# Supplementary material
Source: PubMed Central journal article supplement (PMC3631602)
Supplement: NIHMS446057-supplement-1_si_001.pdf [file NIHMS446057-supplement-1_si_001.pdf]

# **Amphidinolide B: Total Synthesis, Structural Investigation and Biological Evaluation**

Liang Lu,<sup>a</sup> Wei Zhang,<sup>a</sup> Sangkil Nam,<sup>b</sup> David A. Horne,<sup>b</sup> Richard Jove<sup>b</sup> and Rich G. Carter<sup>\*a</sup>

<sup>a</sup> *Department of Chemistry, Oregon State University, Corvallis, OR 97331 and* <sup>b</sup> *Department of Molecular Medicine, Beckman Research Institute, City of Hope, Duarte, CA 91010, USA*

---

**Electronic Supplementary Information: NMR Spectra**

---

## Amphidinolide B: Total Synthesis, Structural Investigation and Biological Evaluation

### Table of Contents

| <b>Compound #</b> | <b>Page Number</b> | <b>Compound #</b> | <b>Page Number</b> | <b>Compound #</b> | <b>Page Number</b> |
|-------------------|--------------------|-------------------|--------------------|-------------------|--------------------|
| 20                | S3                 | 60                | S61                | 100               | S119               |
| 16                | S5                 | SI-13             | S63                | 101               | S121               |
| 23                | S7                 | SI-15             | S65                | 104               | S123               |
| SI-1              | S9                 | SI-16             | S67                | SI-29             | S125               |
| 24                | S11                | SI-17             | S69                | 105               | S127               |
| 28                | S13                | 61                | S71                | SI-130            | S129               |
| 30                | S15                | SI-18             | S73                | 107               | S131               |
| 31                | S17                | 63                | S75                | 109               | S133               |
| 14                | S19                | SI-19             | S77                | SI-31             | S135               |
| 12                | S21                | 64                | S79                | 106               | S137               |
| 37                | S23                | 65                | S81                | SI-32             | S139               |
| SI-4              | S25                | 66                | S83                | 108               | S141               |
| SI-5              | S27                | 67                | S85                | 110               | S143               |
| 13                | S29                | 57                | S87                | 111               | S145               |
| 11                | S31                | SI-21             | S89                | 113               | S147               |
| 48                | S33                | SI-22             | S91                | 112               | S149               |
| 49                | S35                | 82                | S93                | SI-33             | S151               |
| 53                | S37                | SI-24             | S95                | 3                 | S153               |
| 54                | S39                | SI-25             | S97                | SI-35             | S155               |
| SI-13             | S41                | SI-26             | S99                | 114               | S157               |
| 69                | S43                | 81                | S101               | 118               | S159               |
| 70                | S45                | 83                | S103               | SI-36             | S161               |
| 71                | S47                | 93                | S105               | 120               | S163               |
| 72                | S49                | 94                | S107               | 119               | S165               |
| 51                | S51                | 95                | S109               | SI-38             | S167               |
| 75                | S53                | 96                | S111               | 2                 | S169               |
| 76                | S55                | 97                | S113               | SI-40             | S173               |
| 78                | S57                | SI-28             | S115               | 121               | S175               |
| 79                | S59                | 98                | S117               |                   |                    |

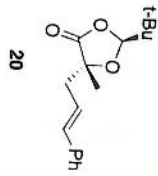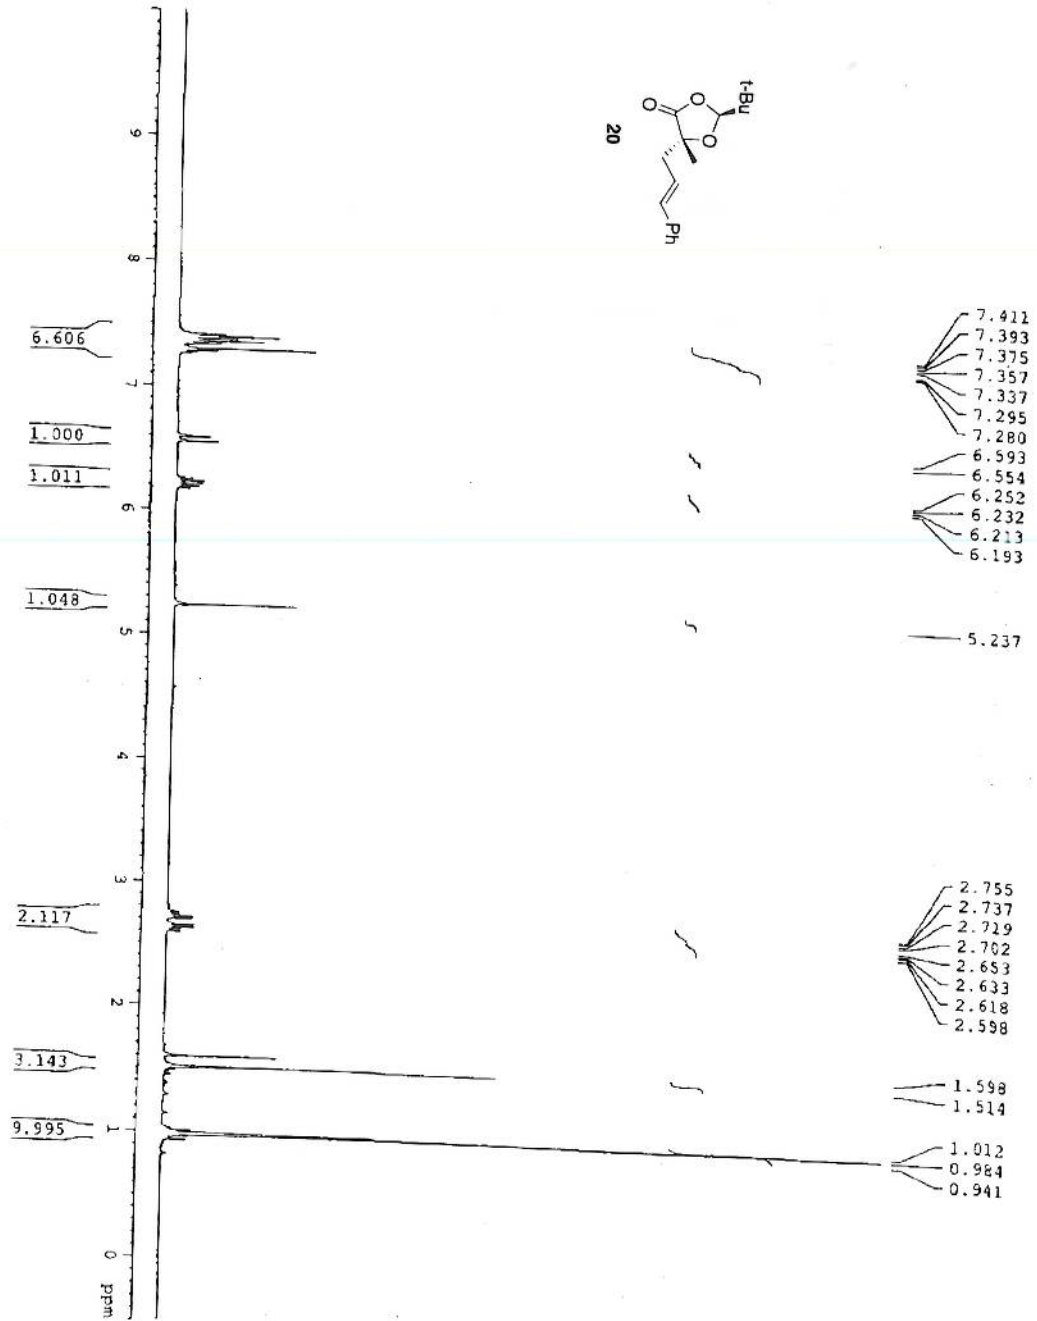

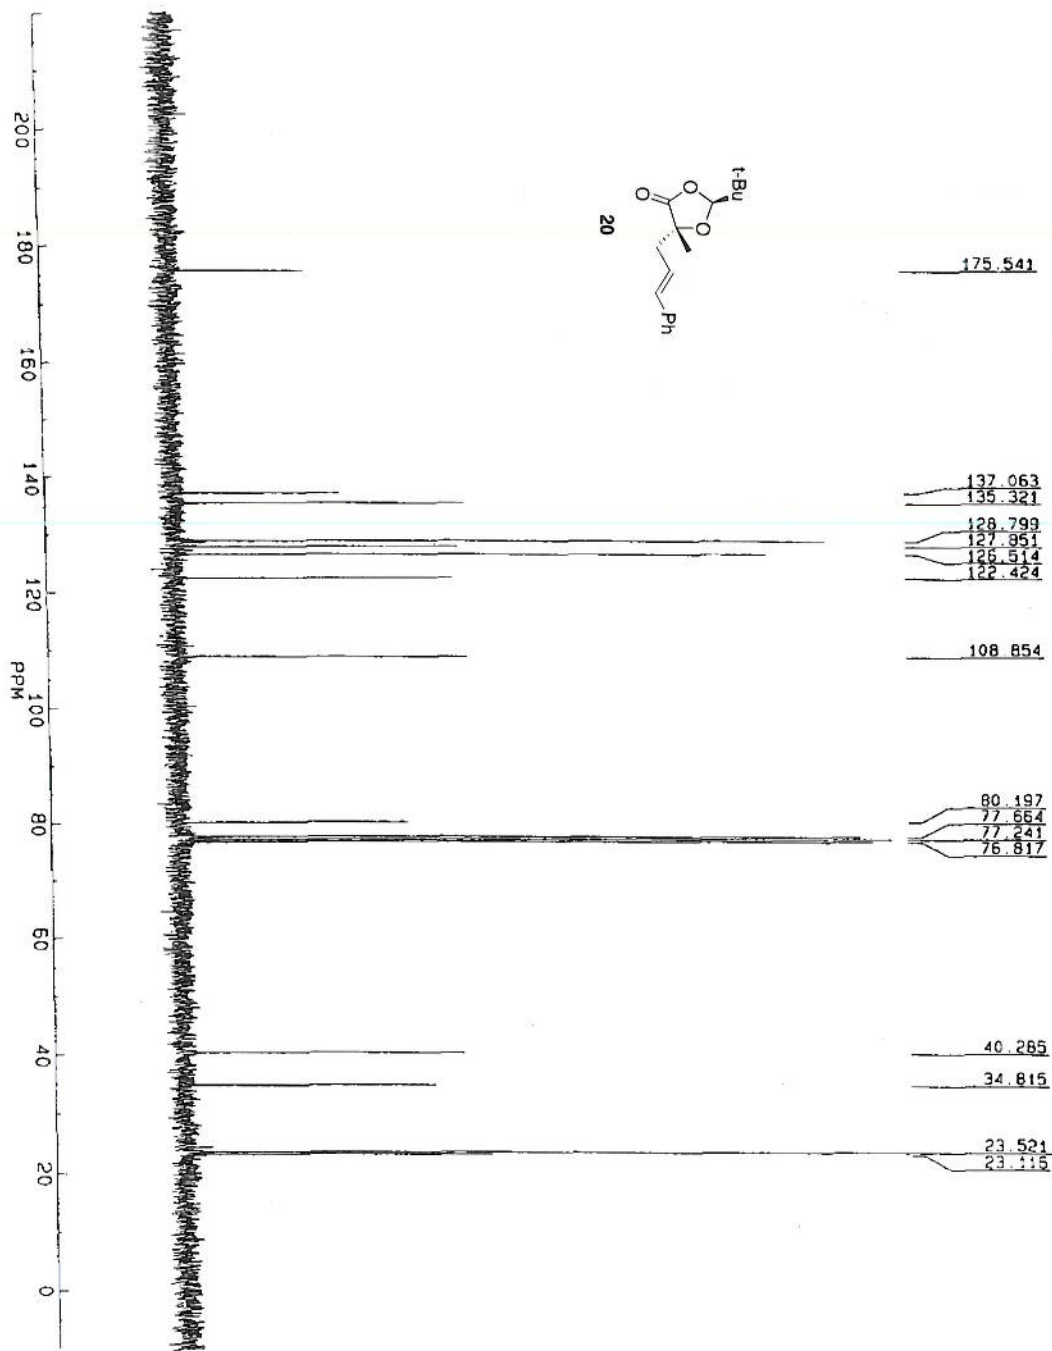

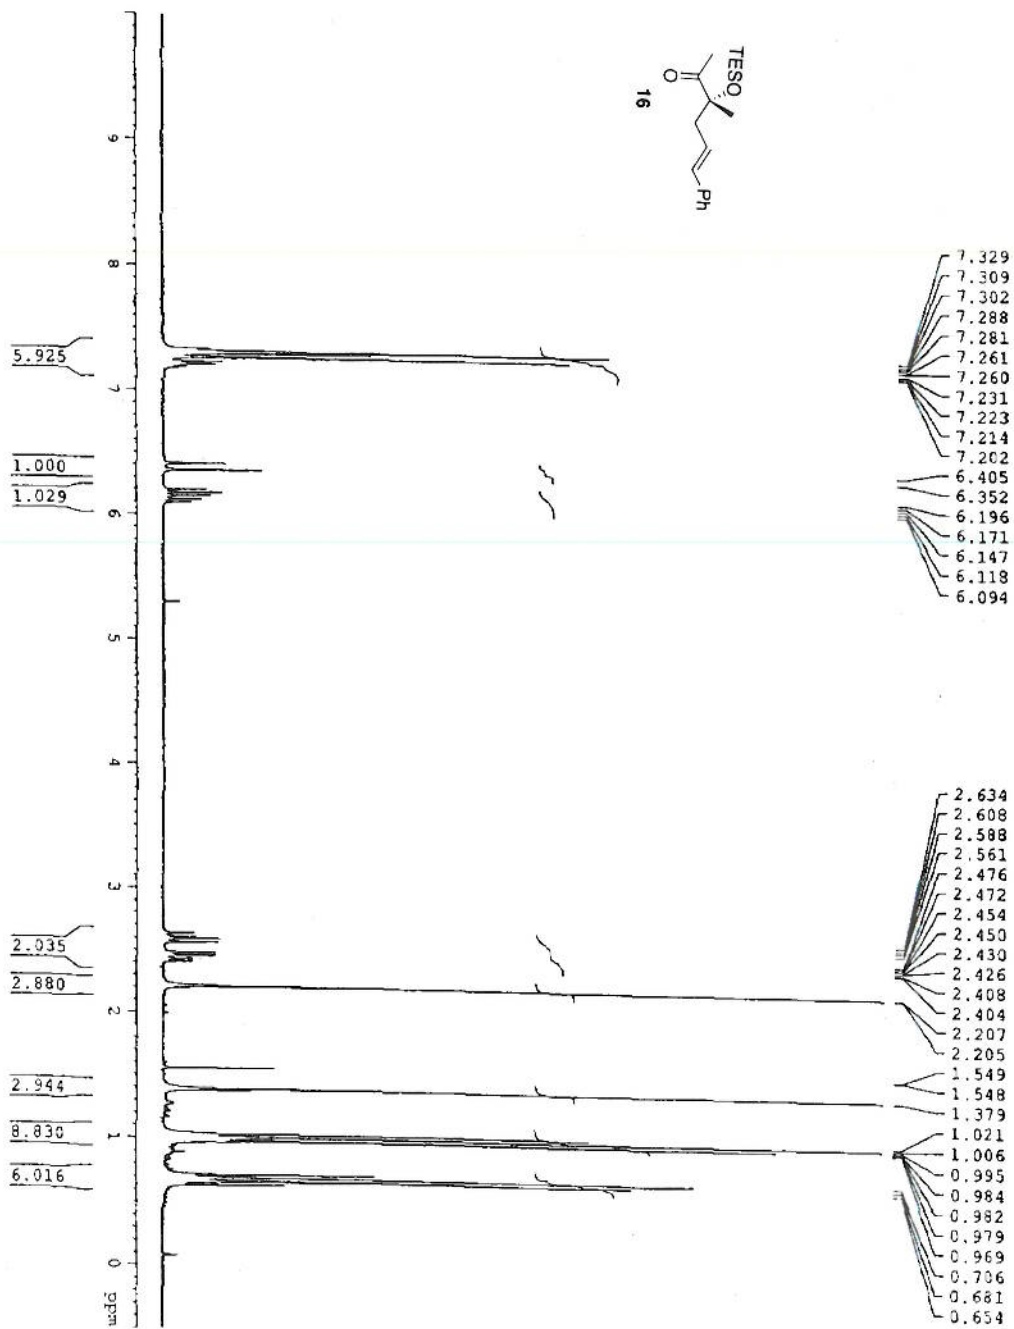

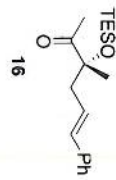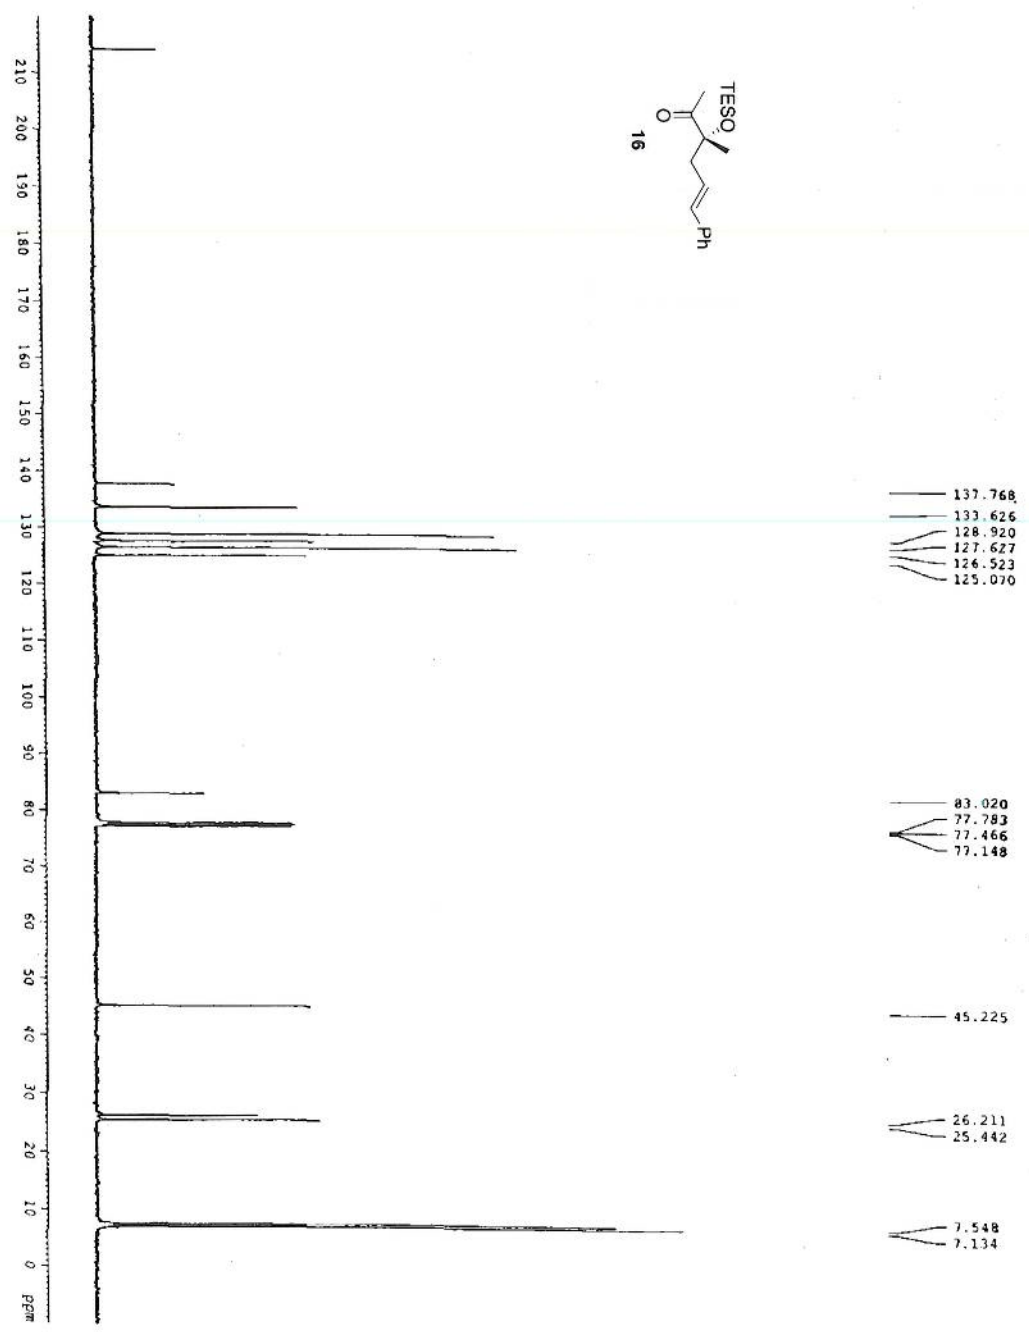

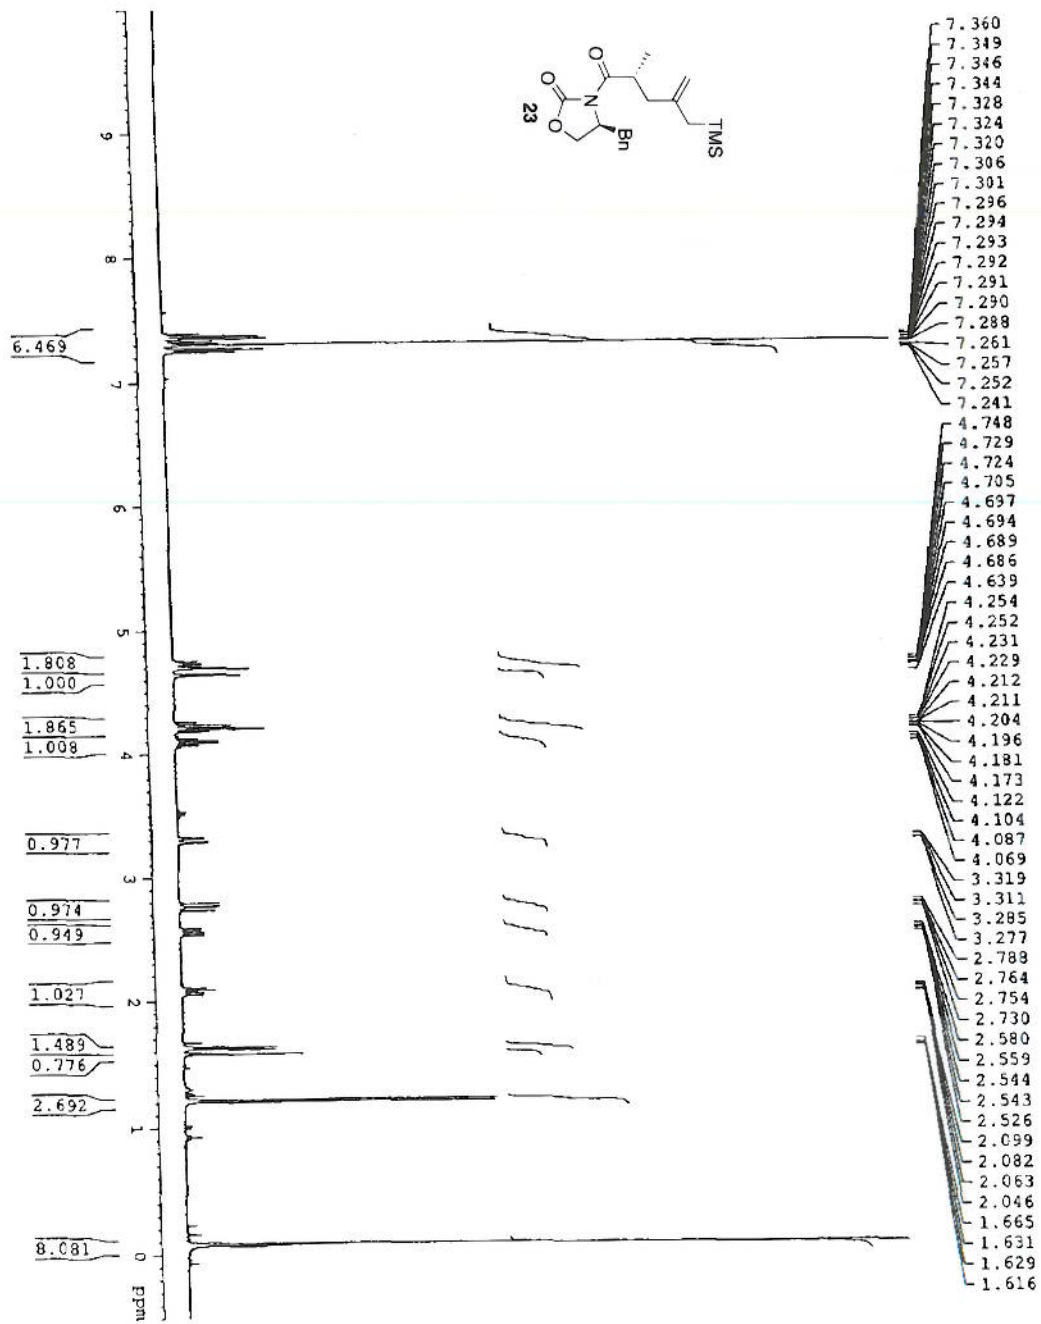

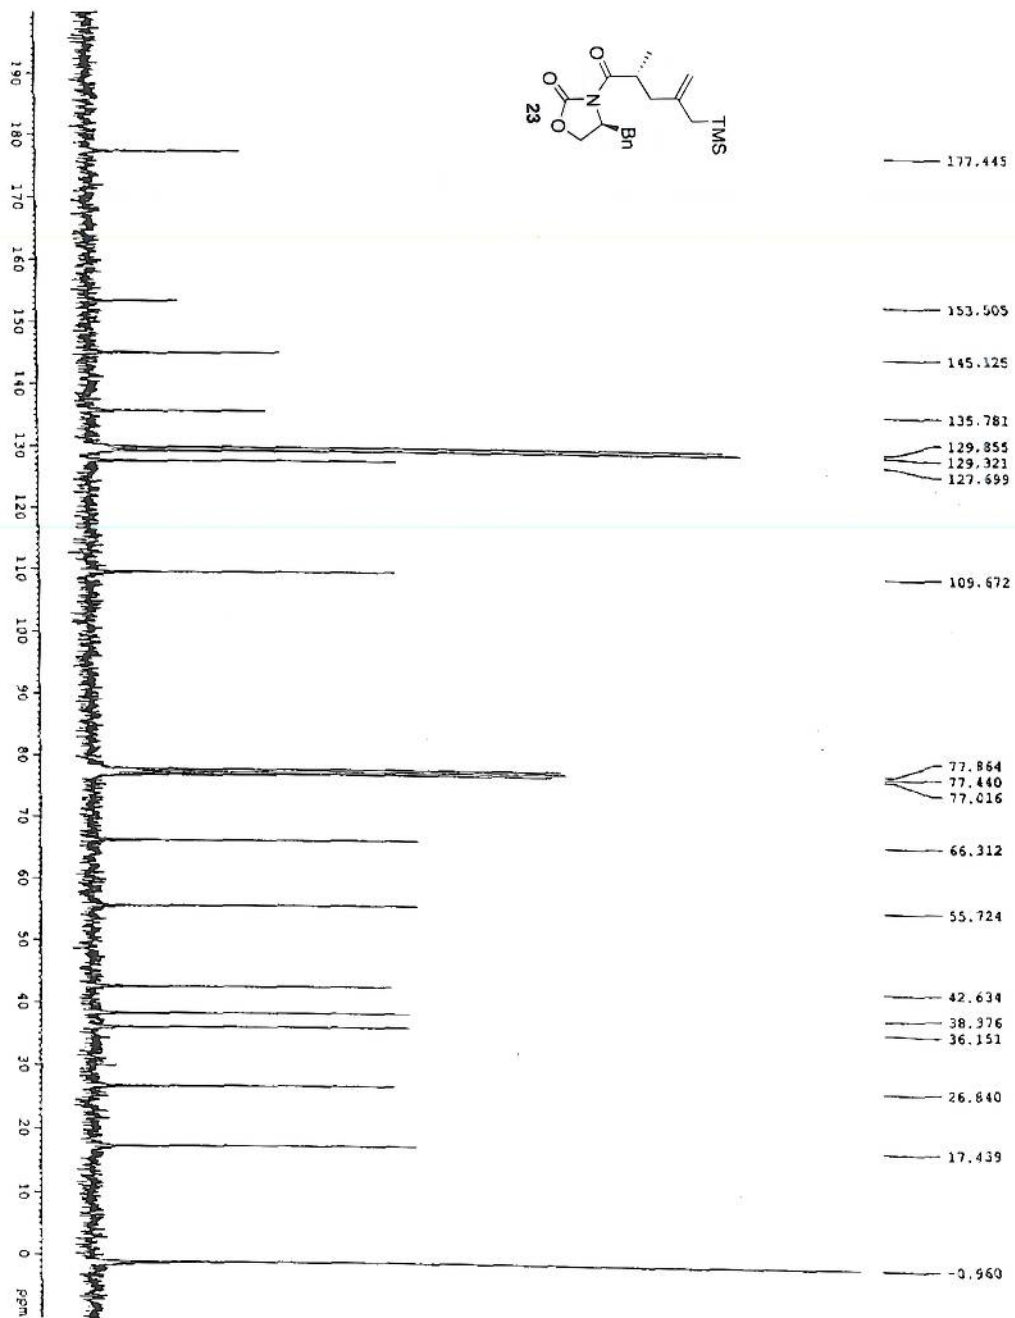



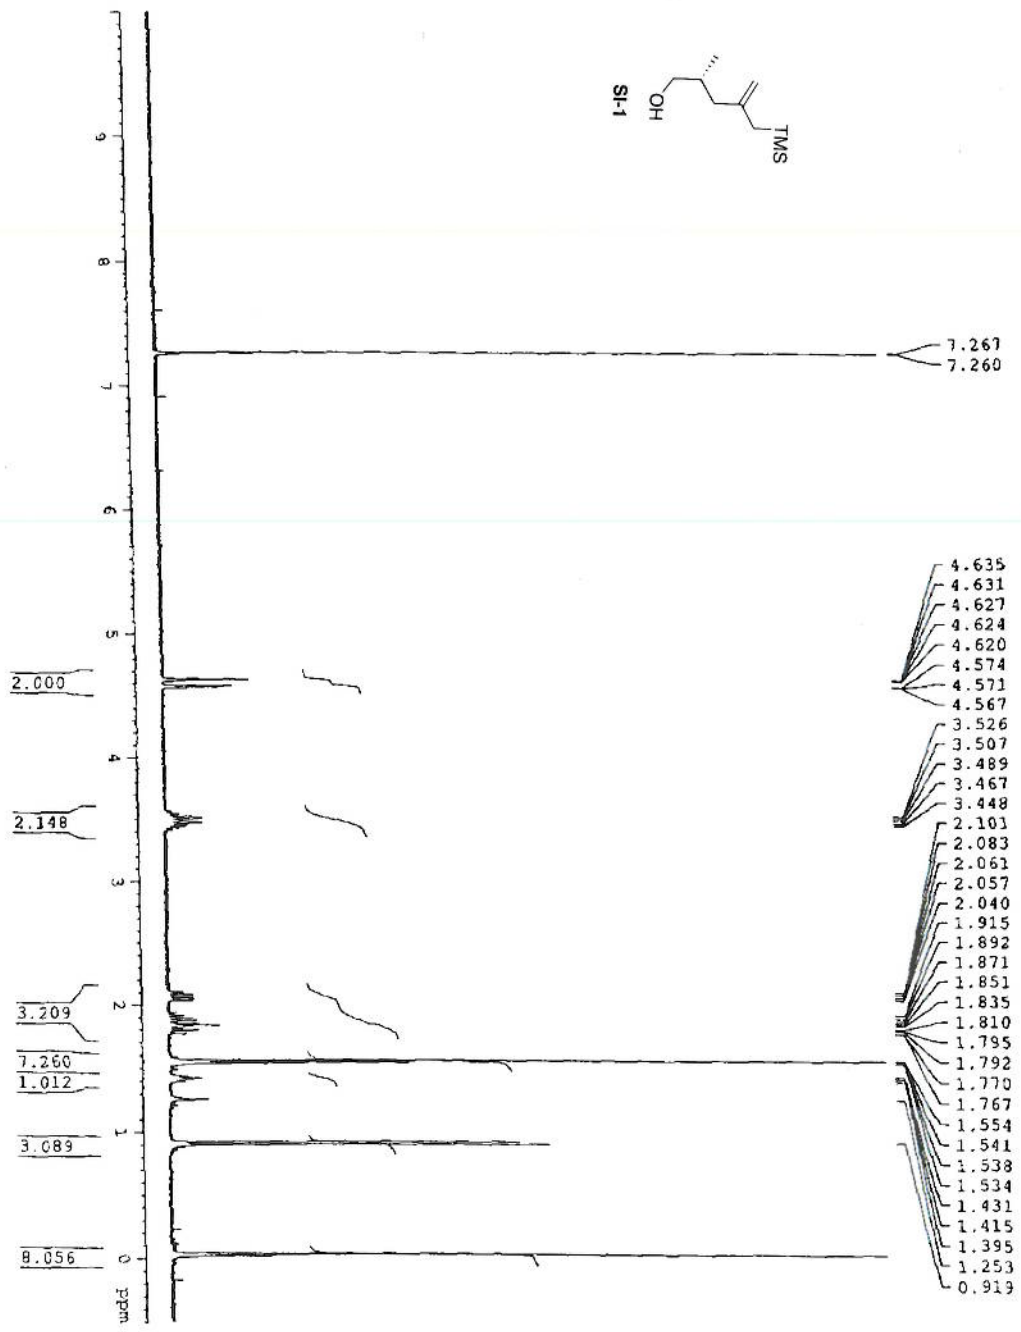

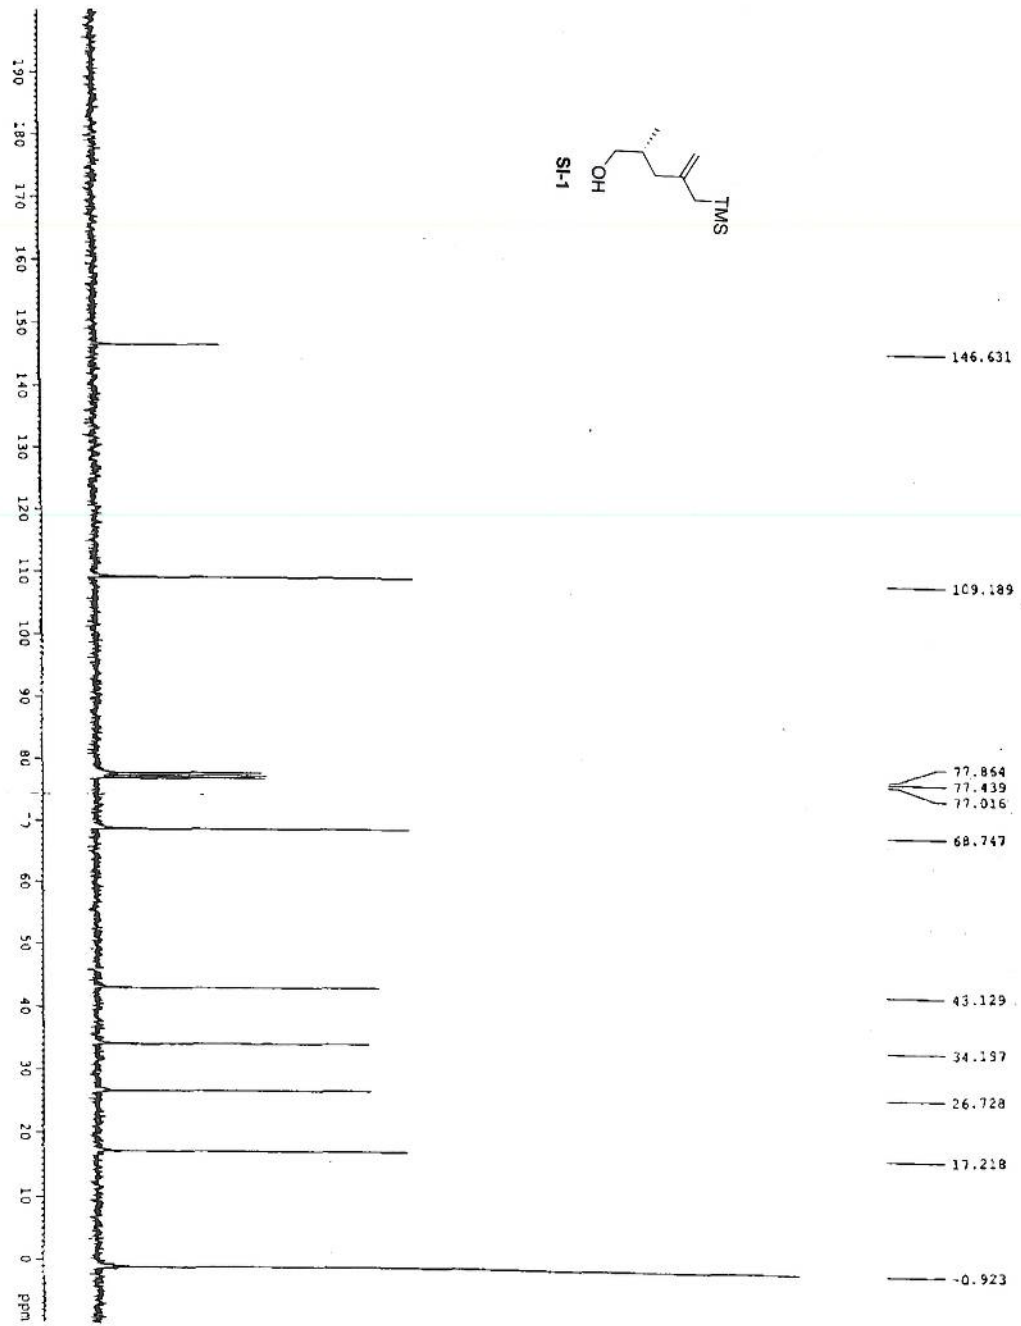

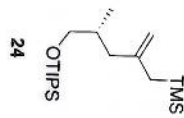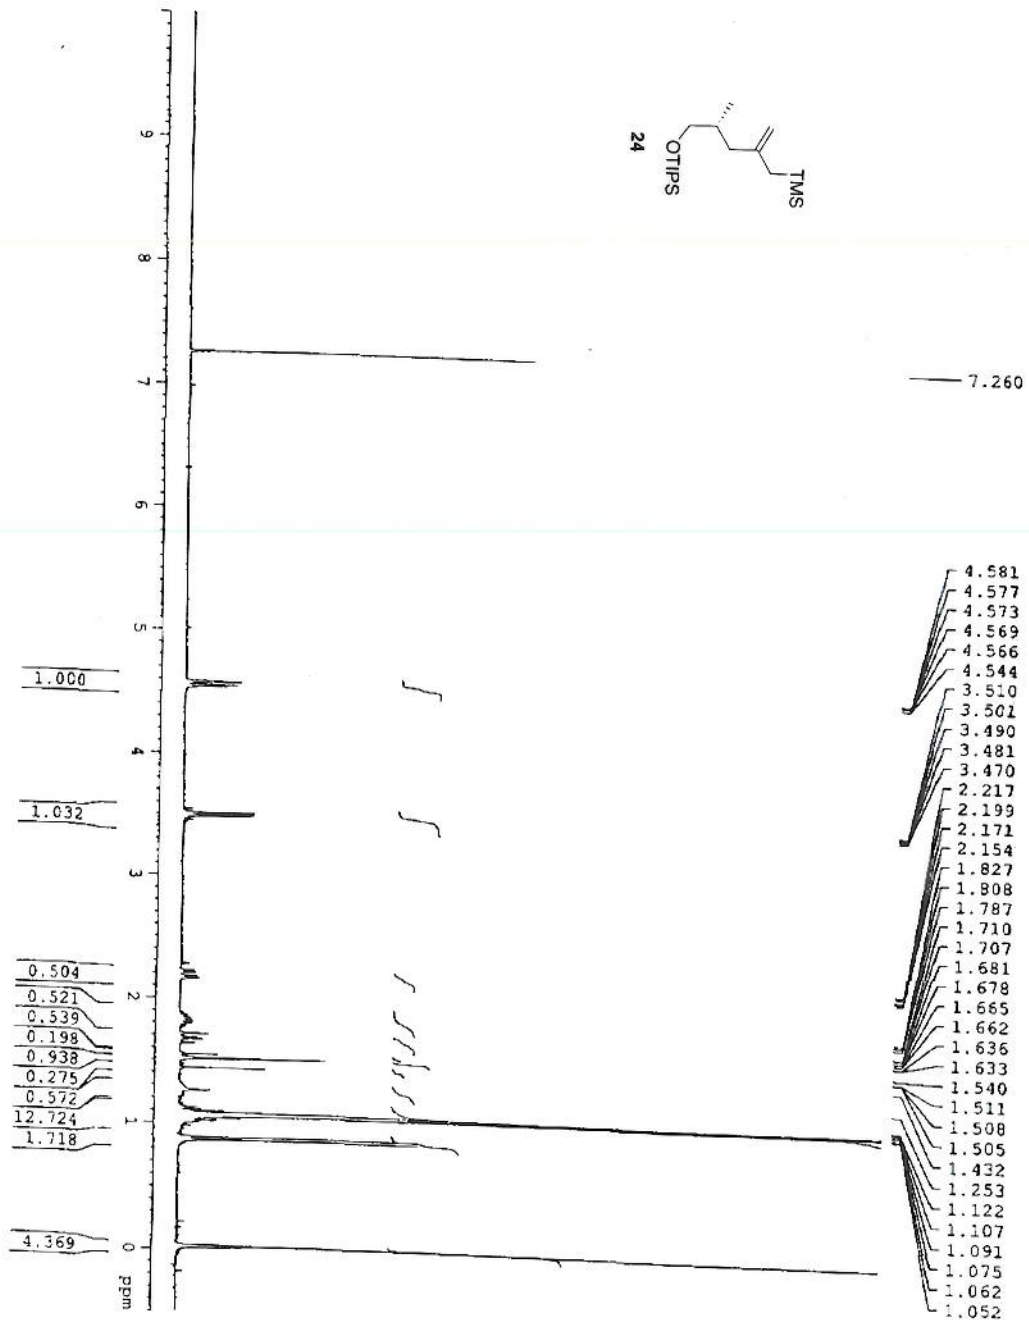

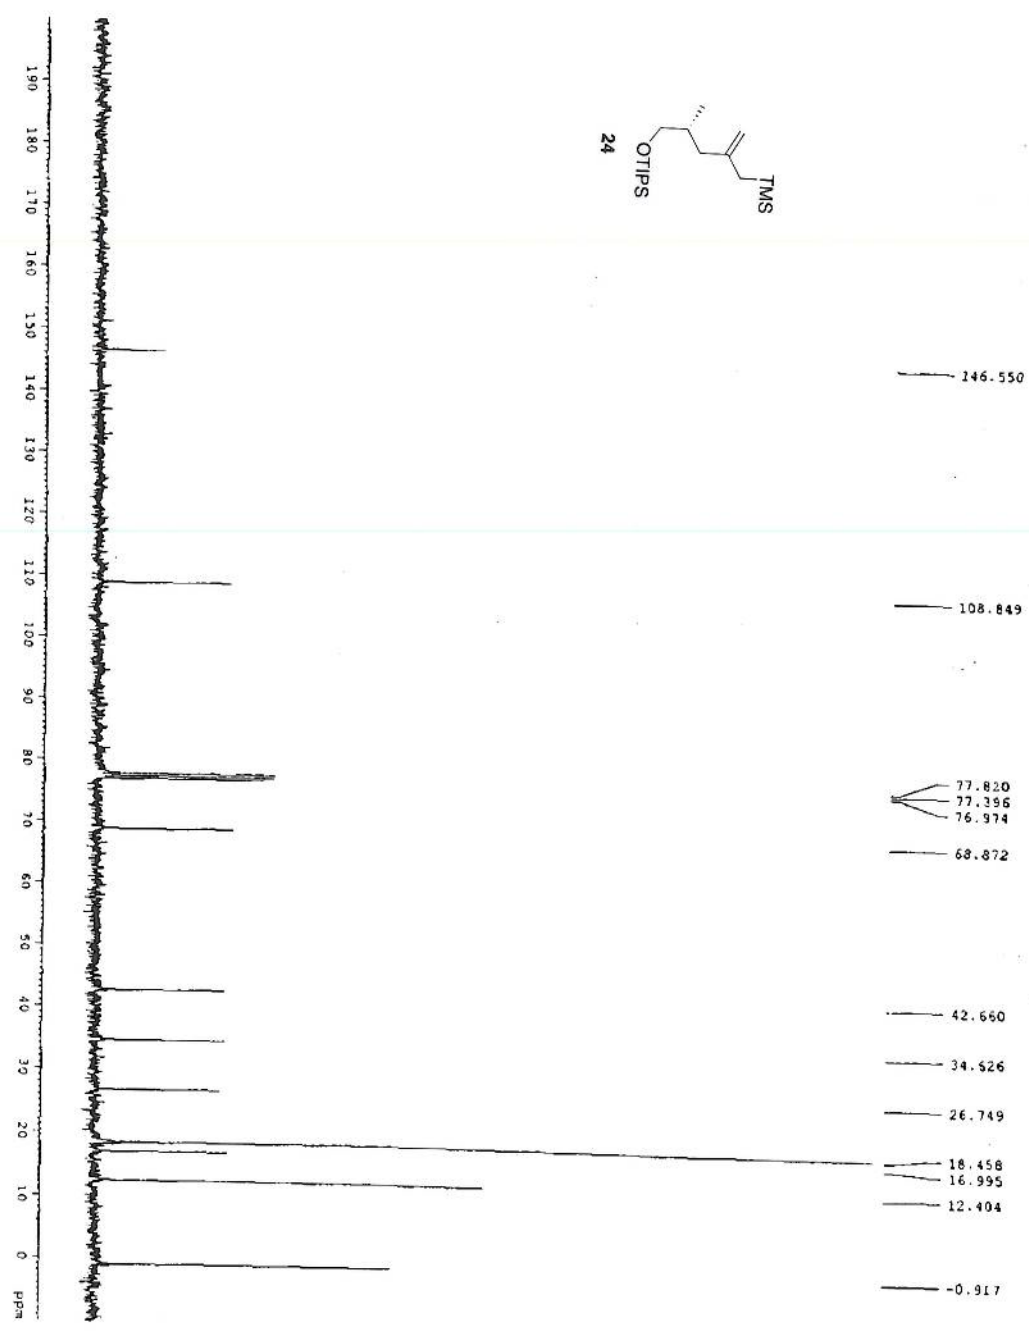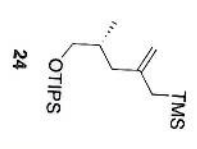

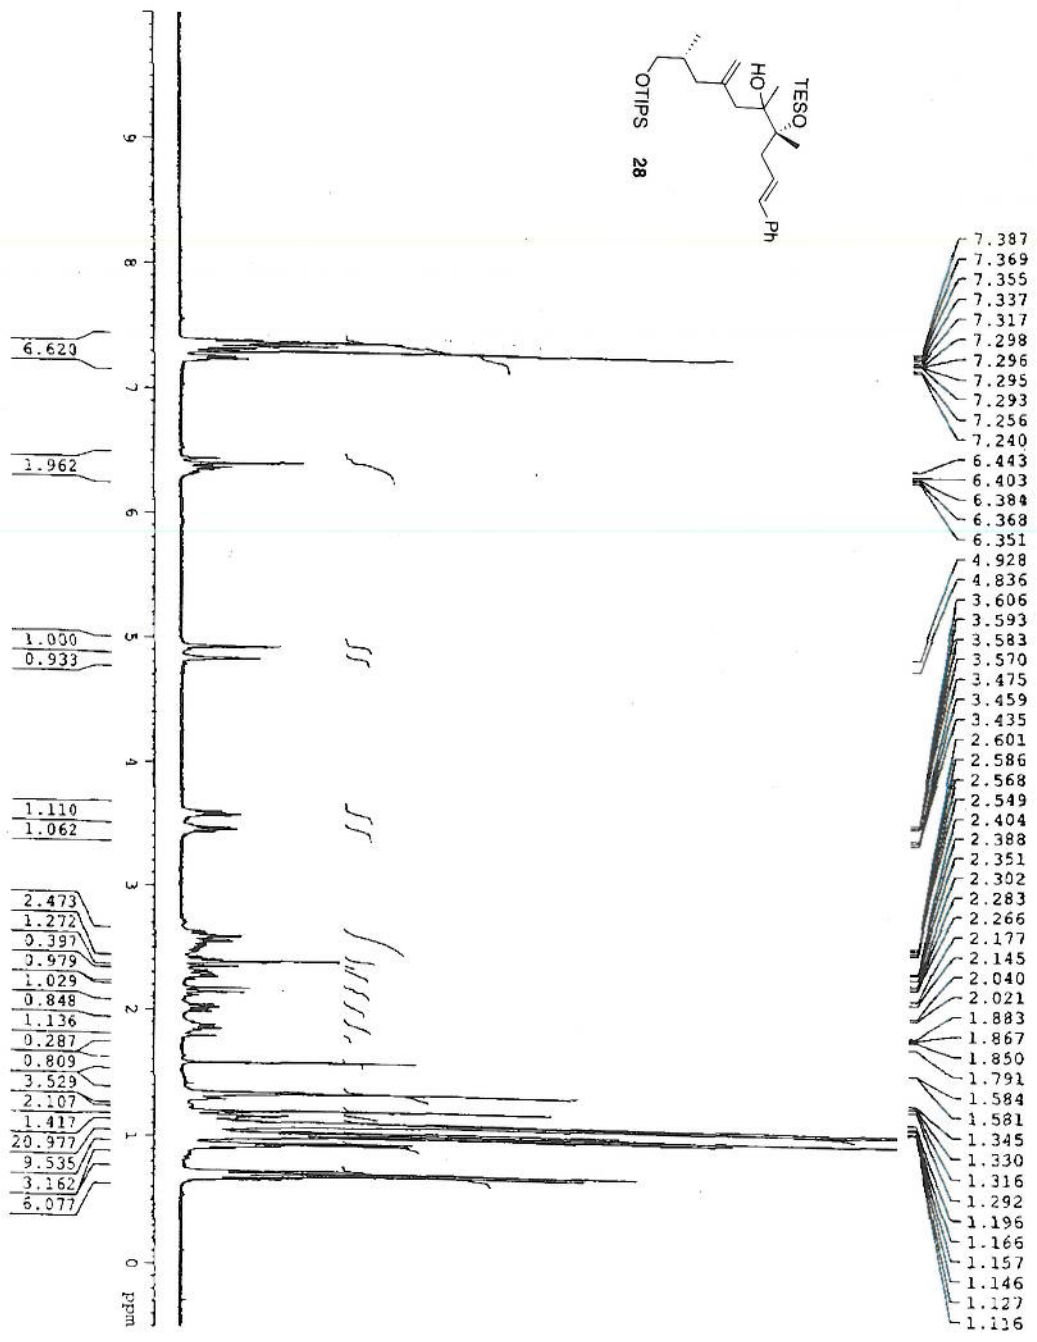

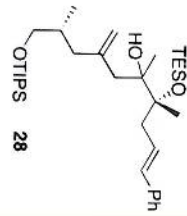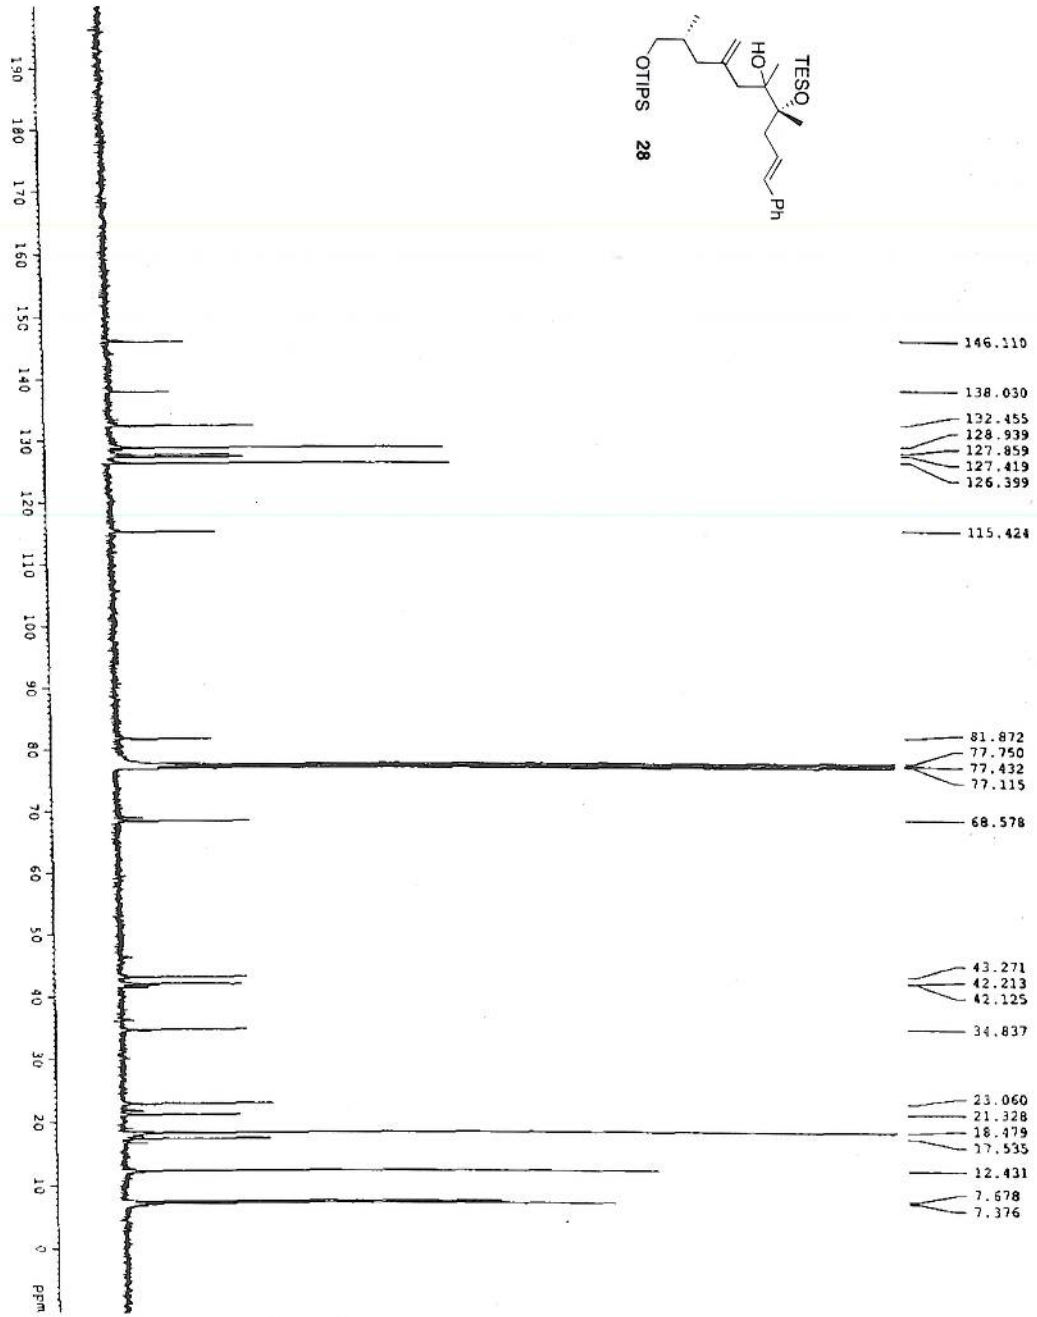

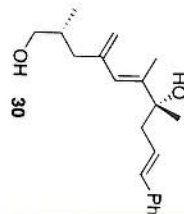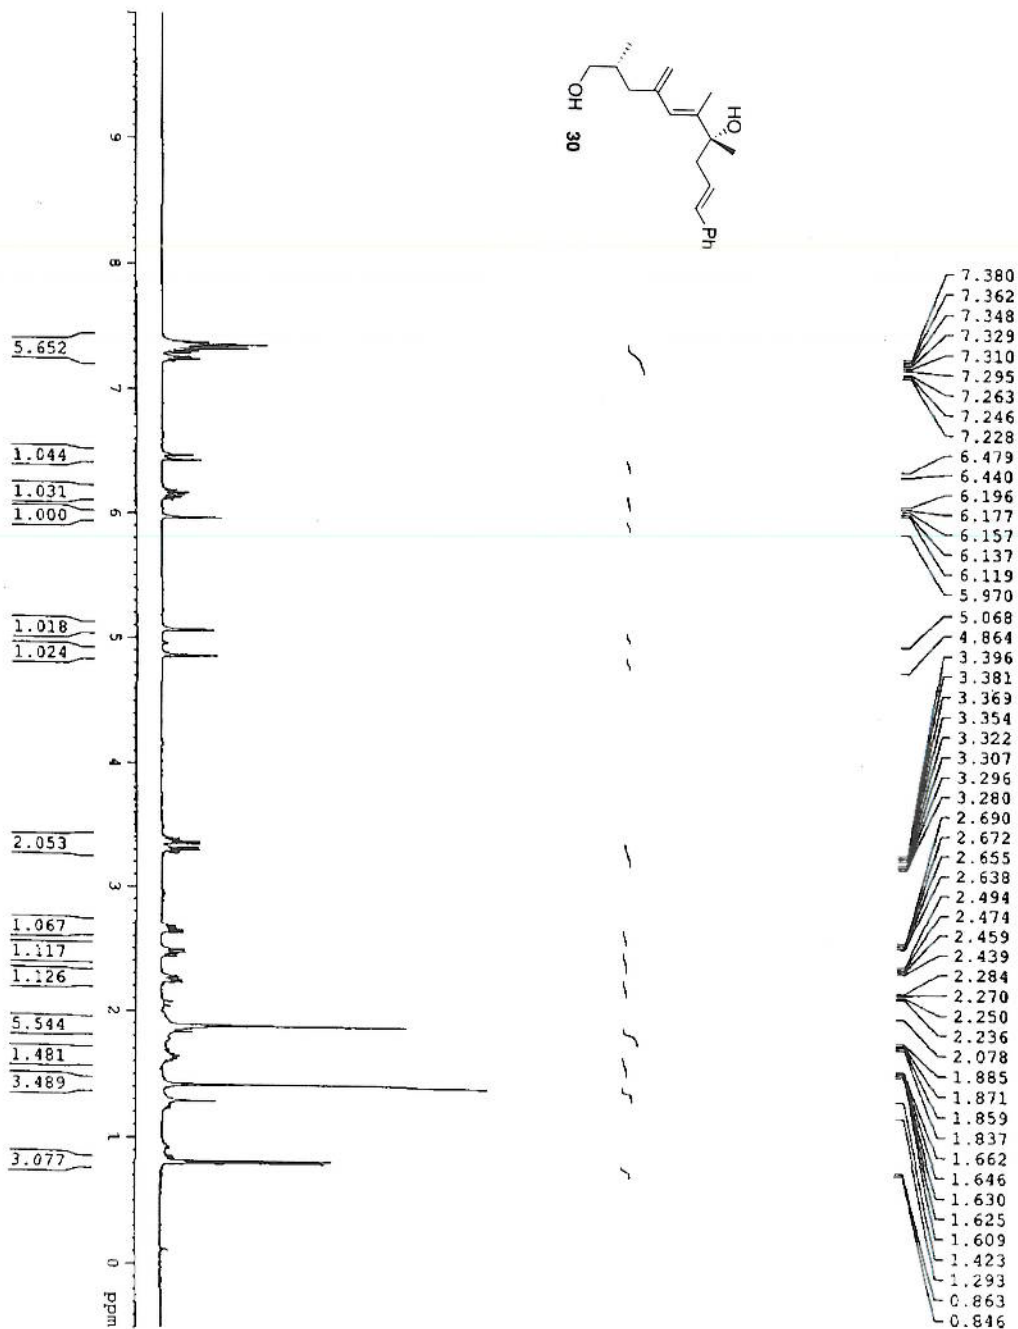

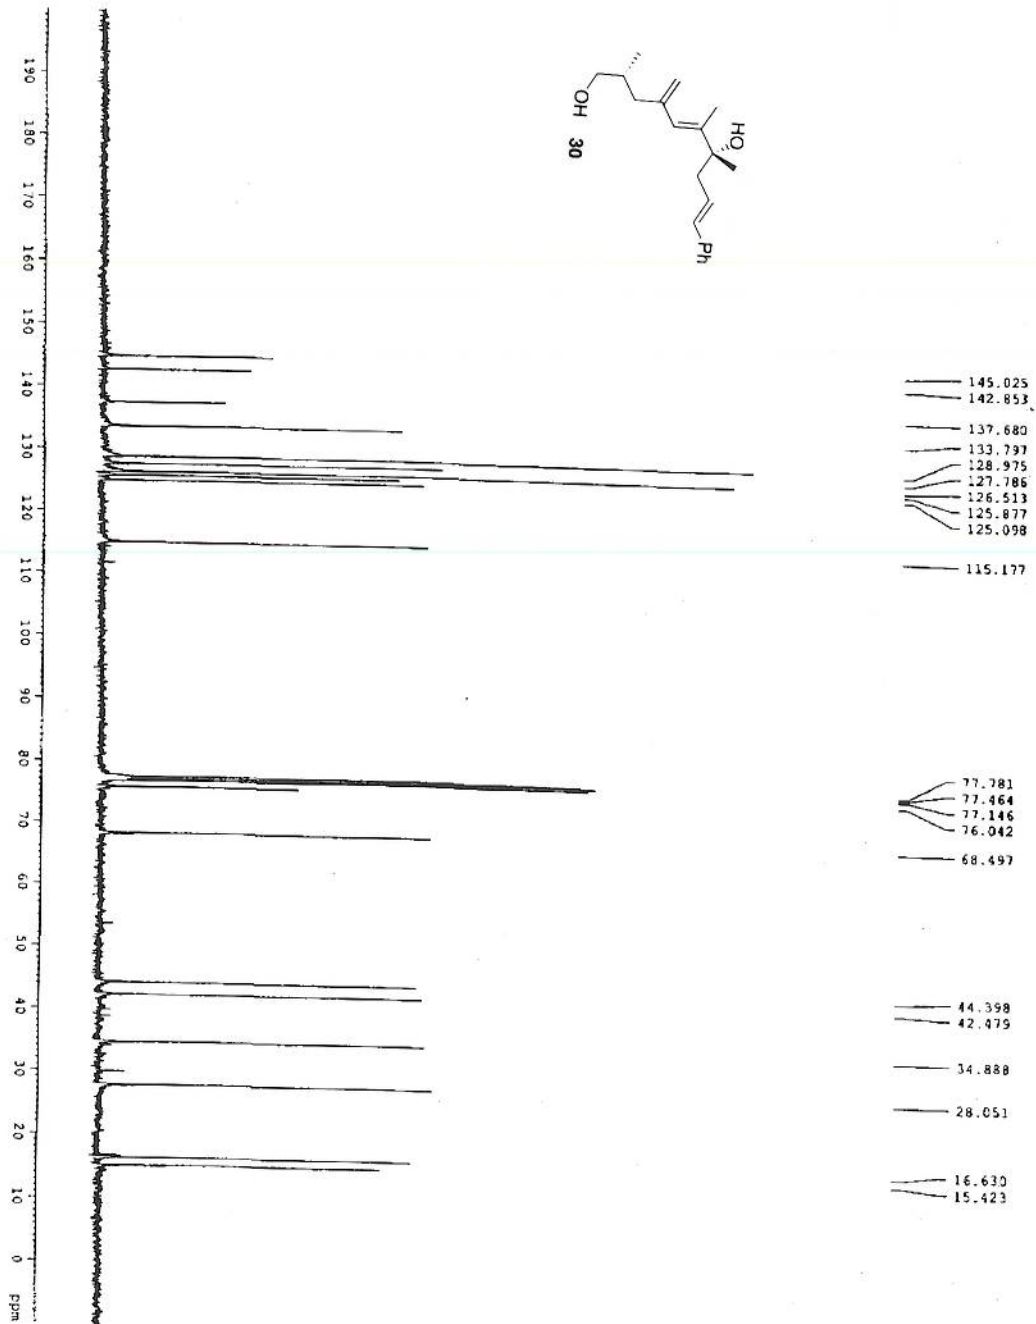



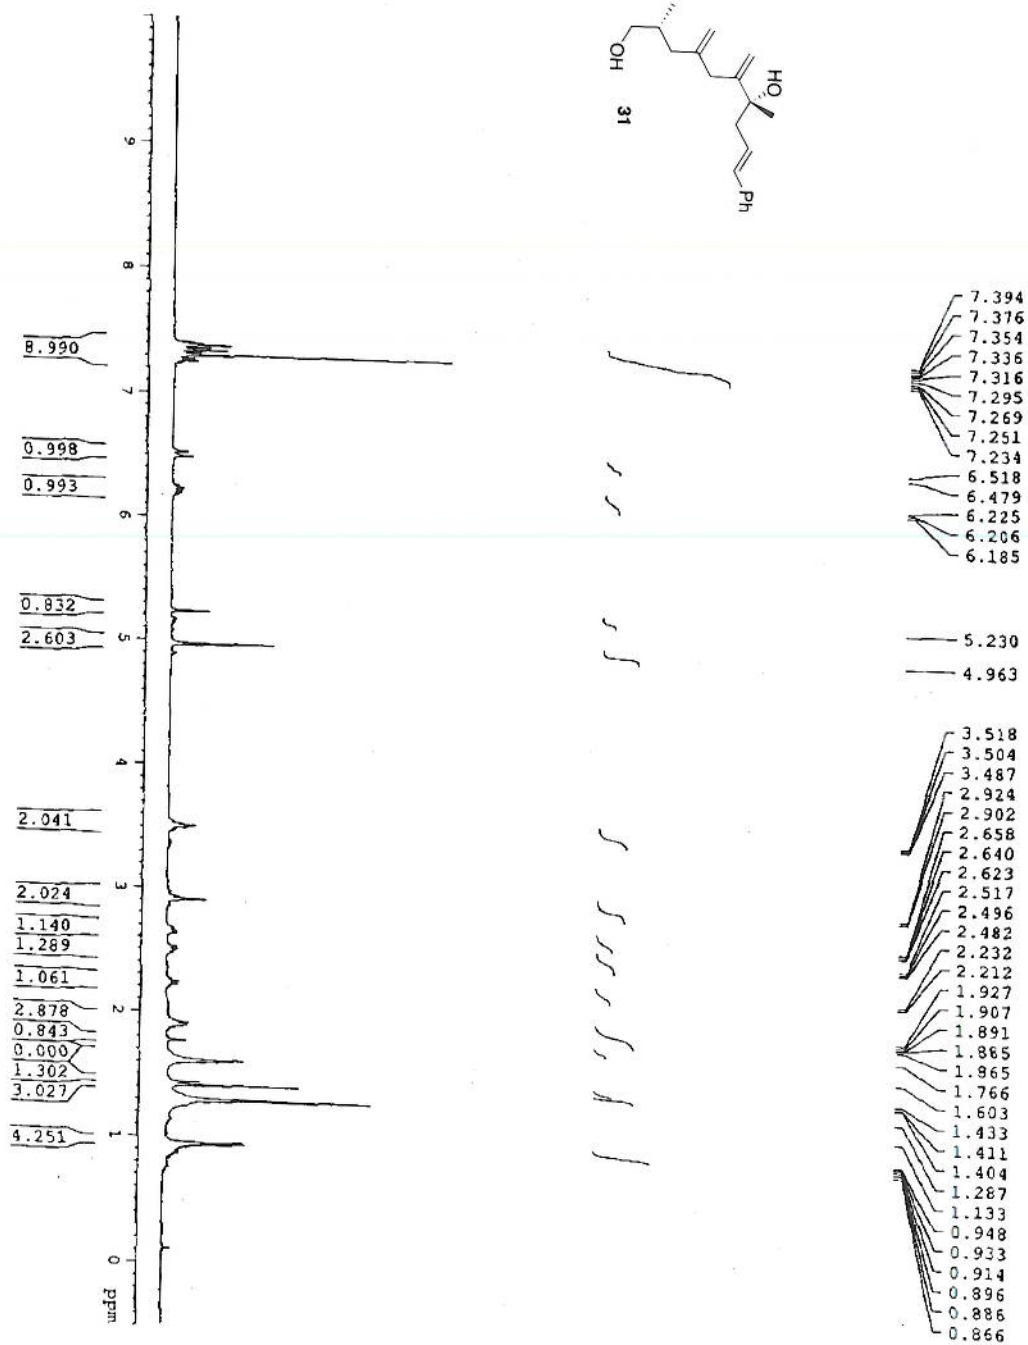

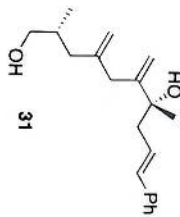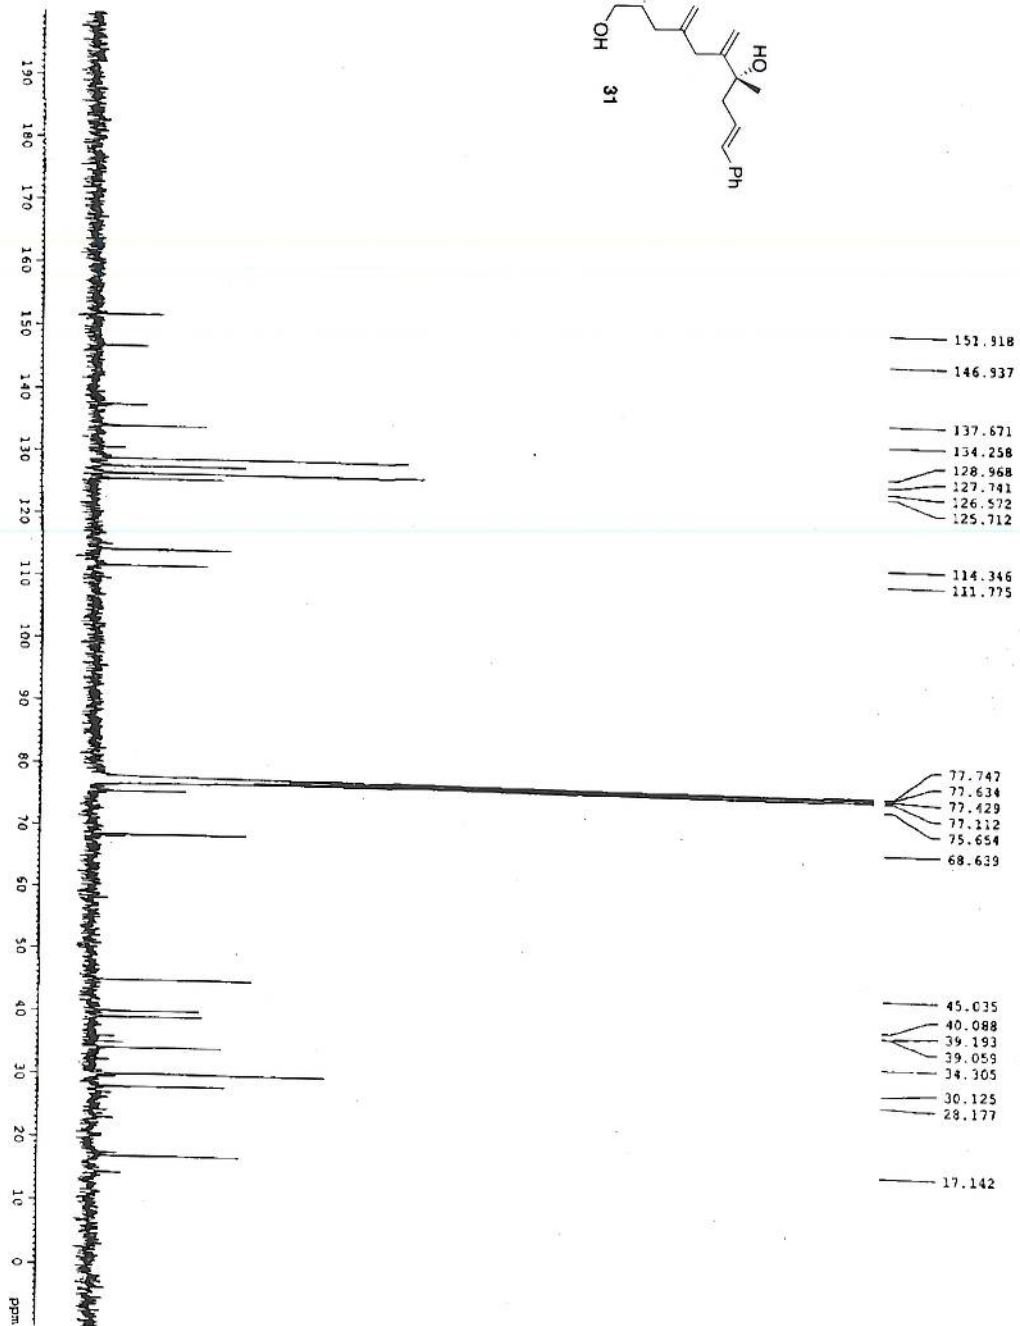

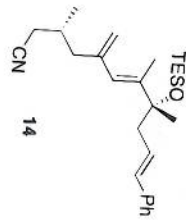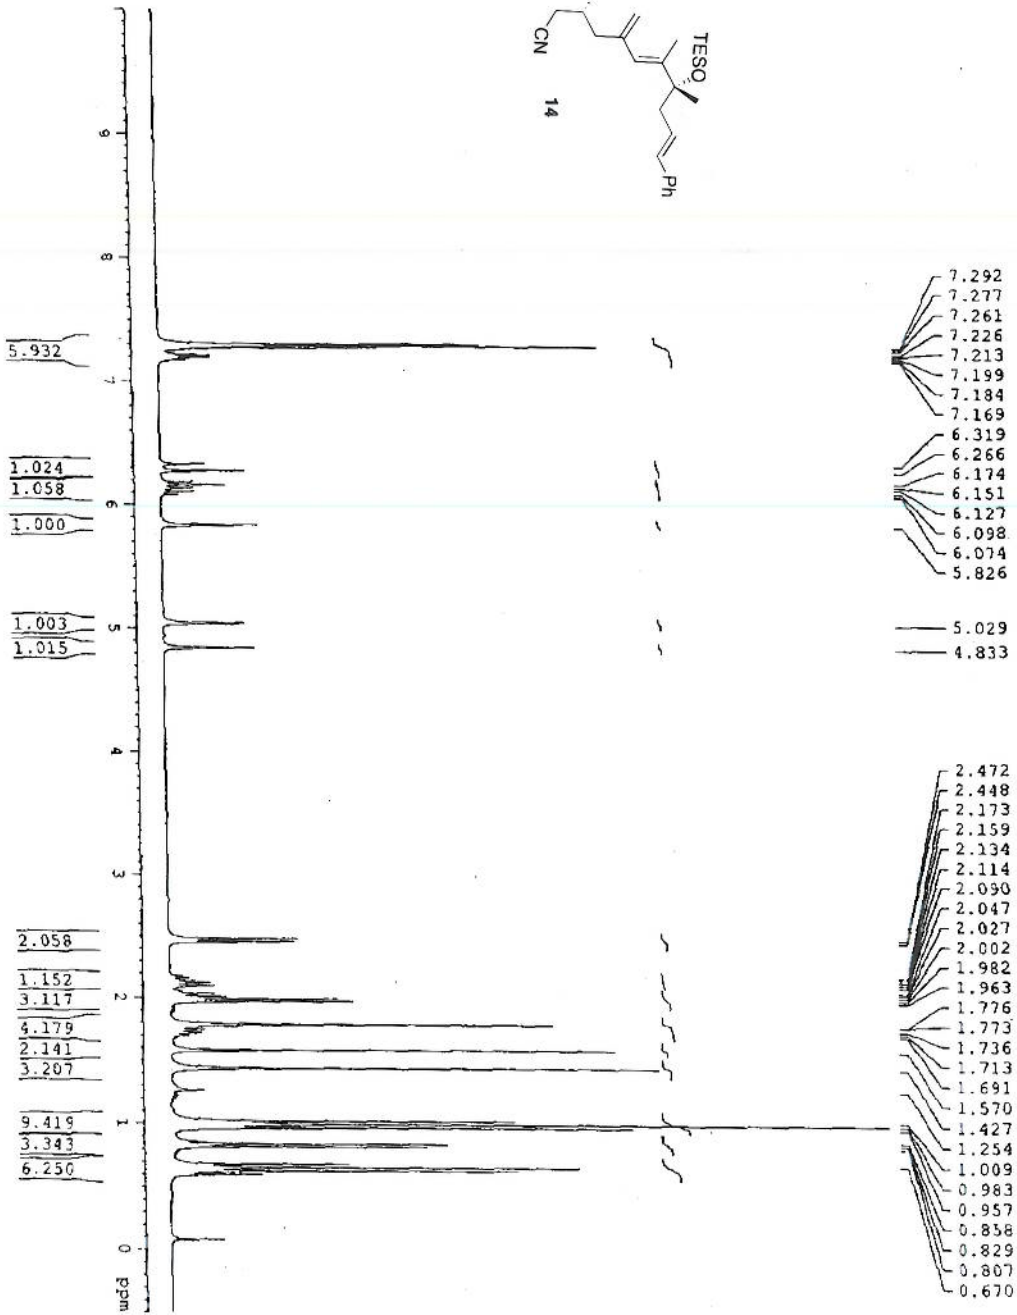

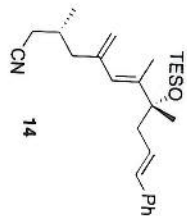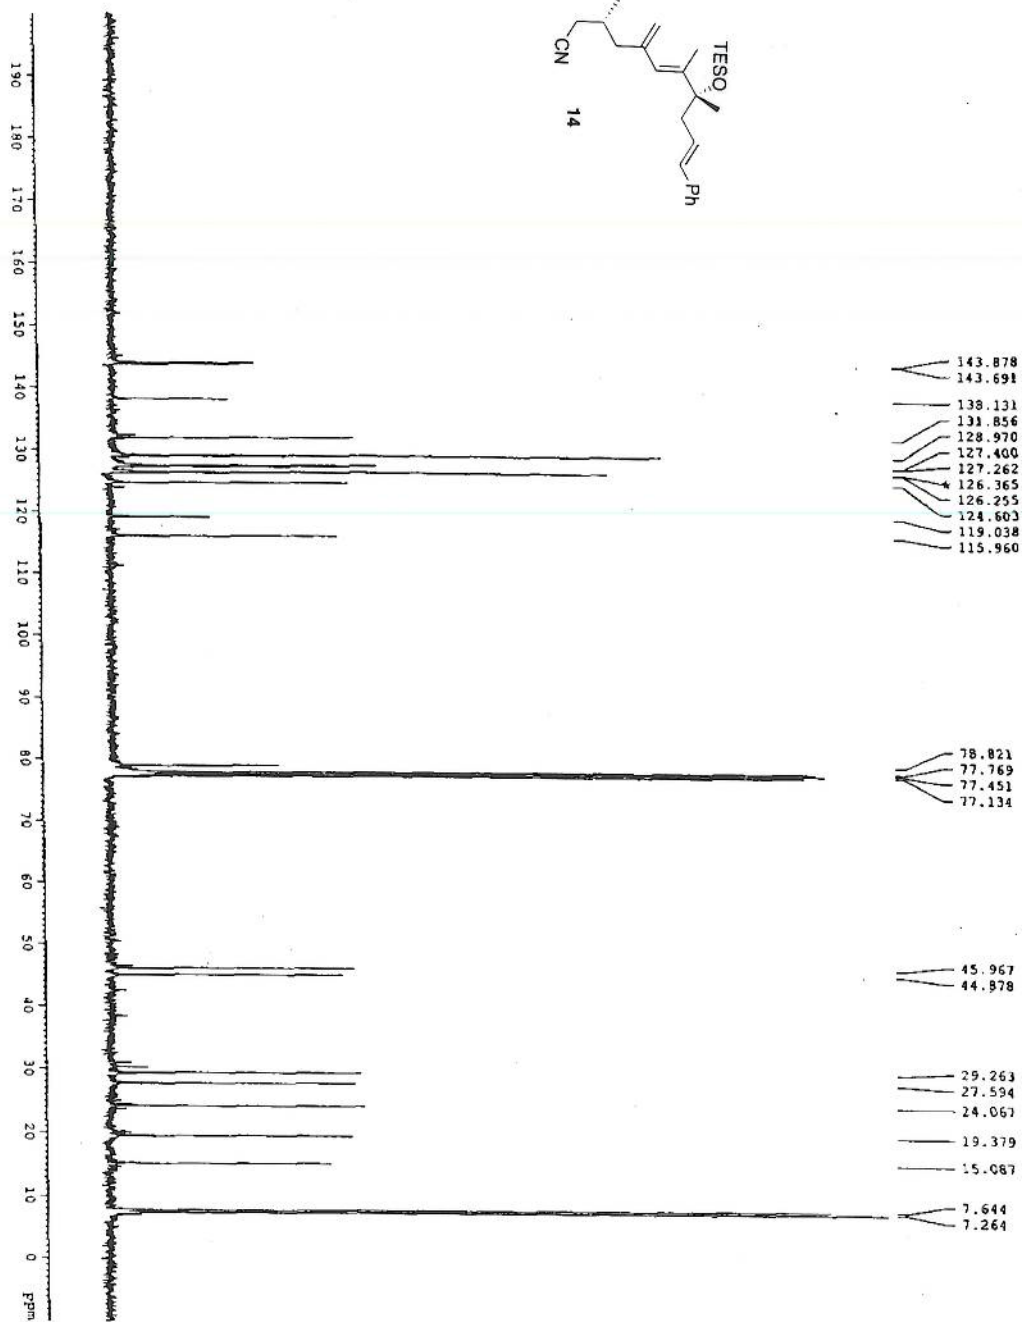

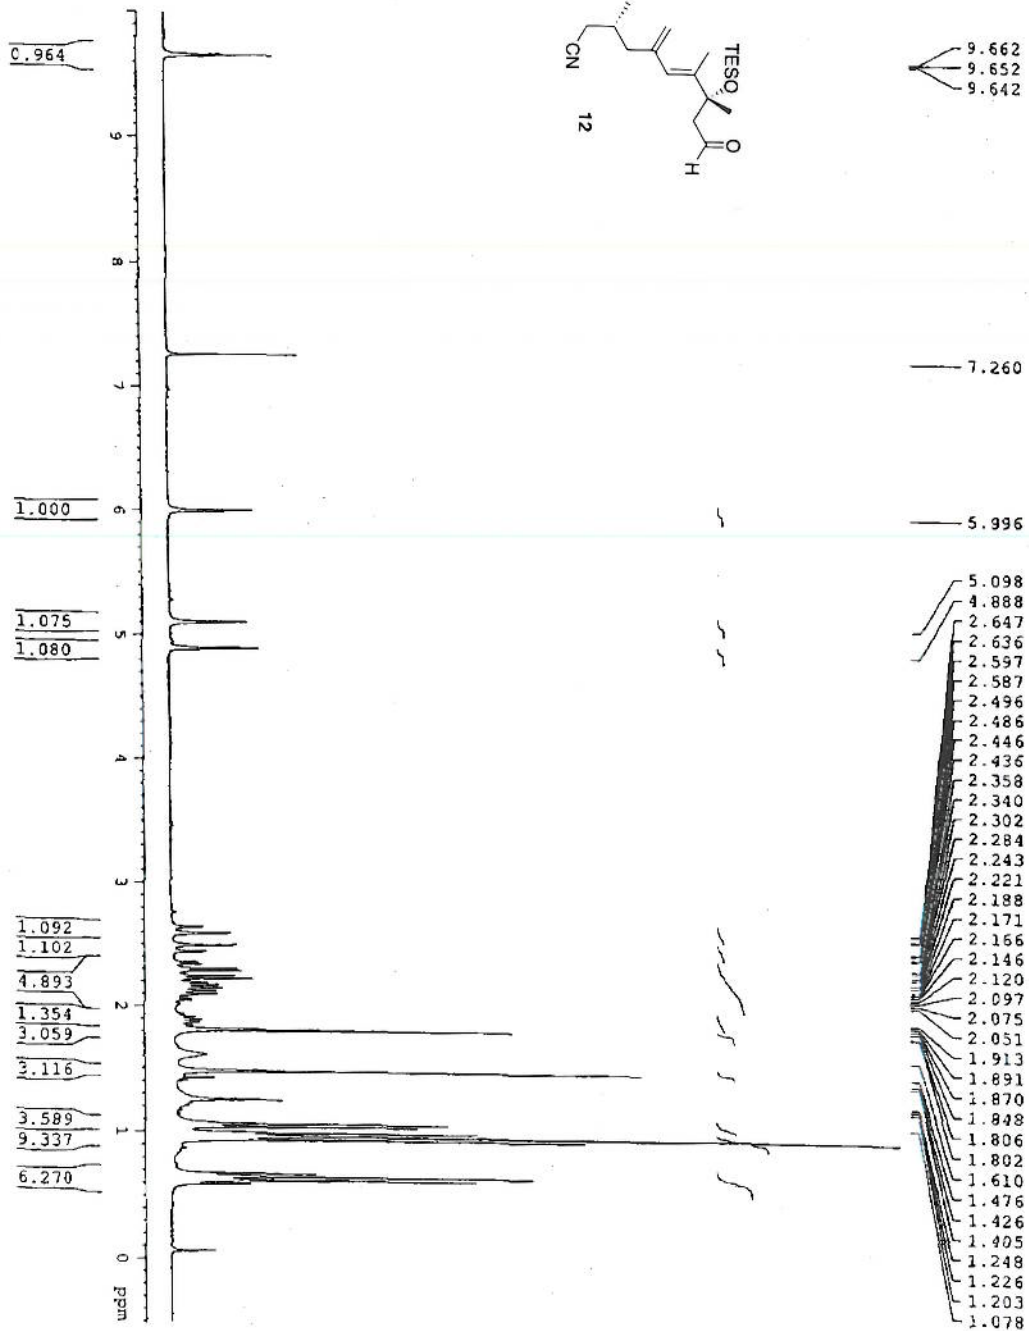

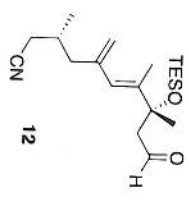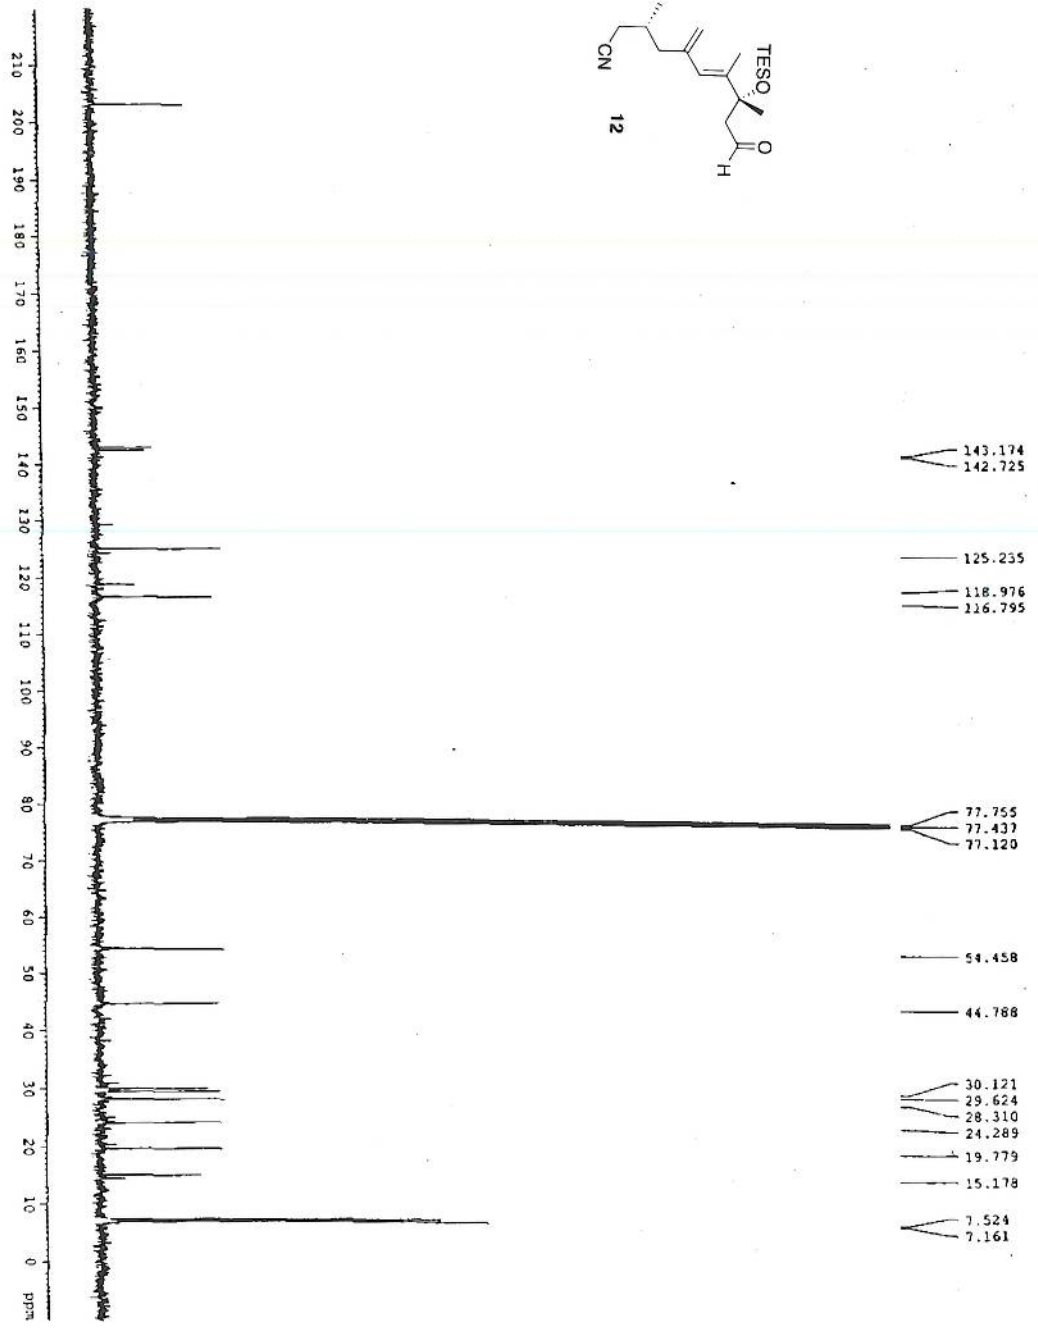

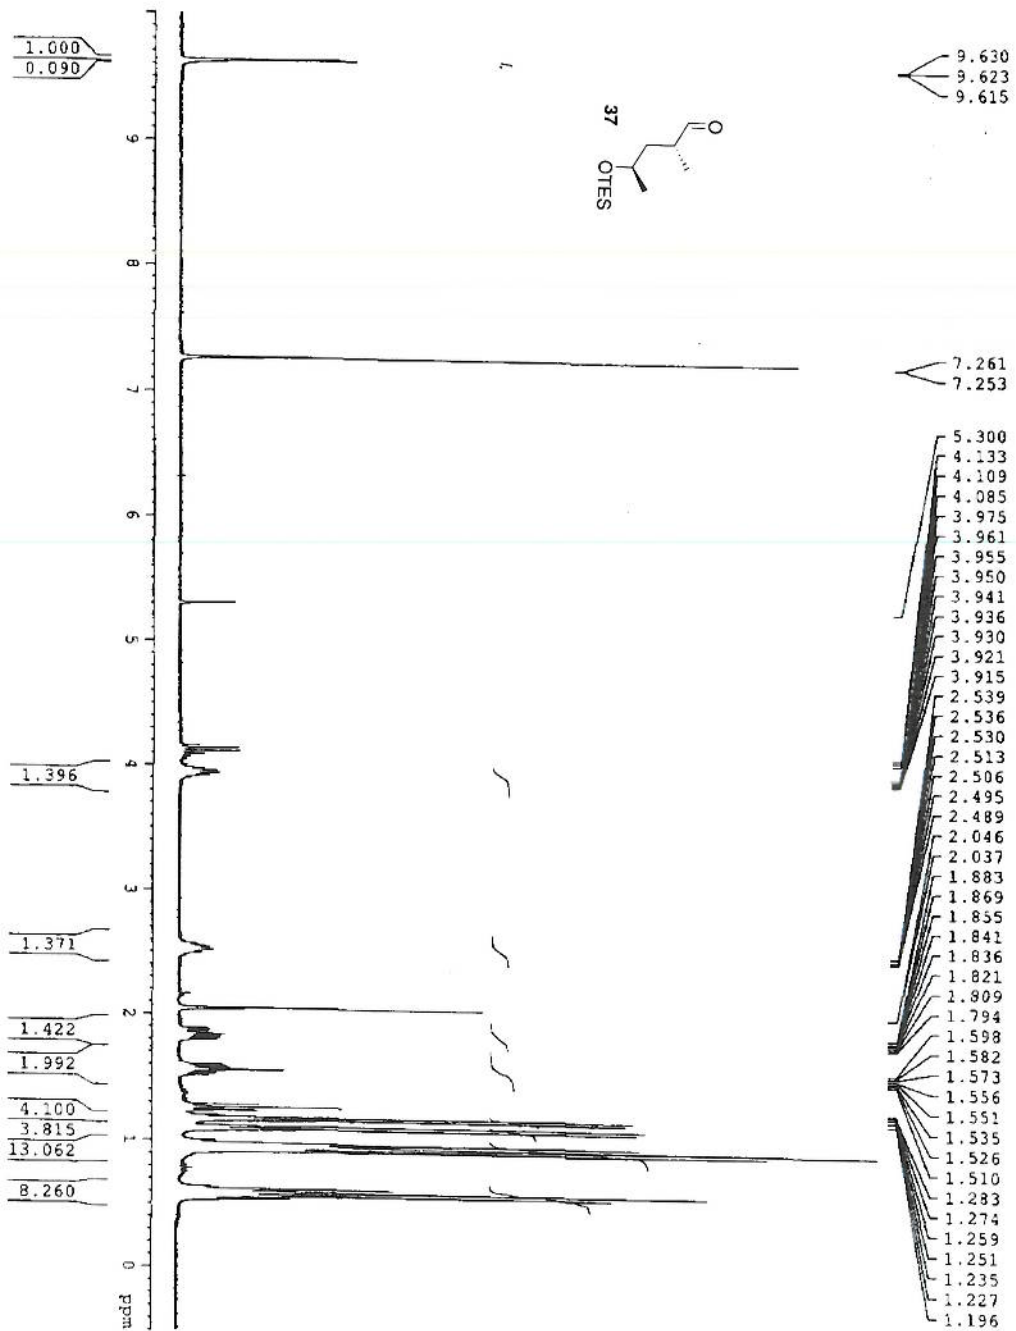

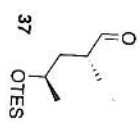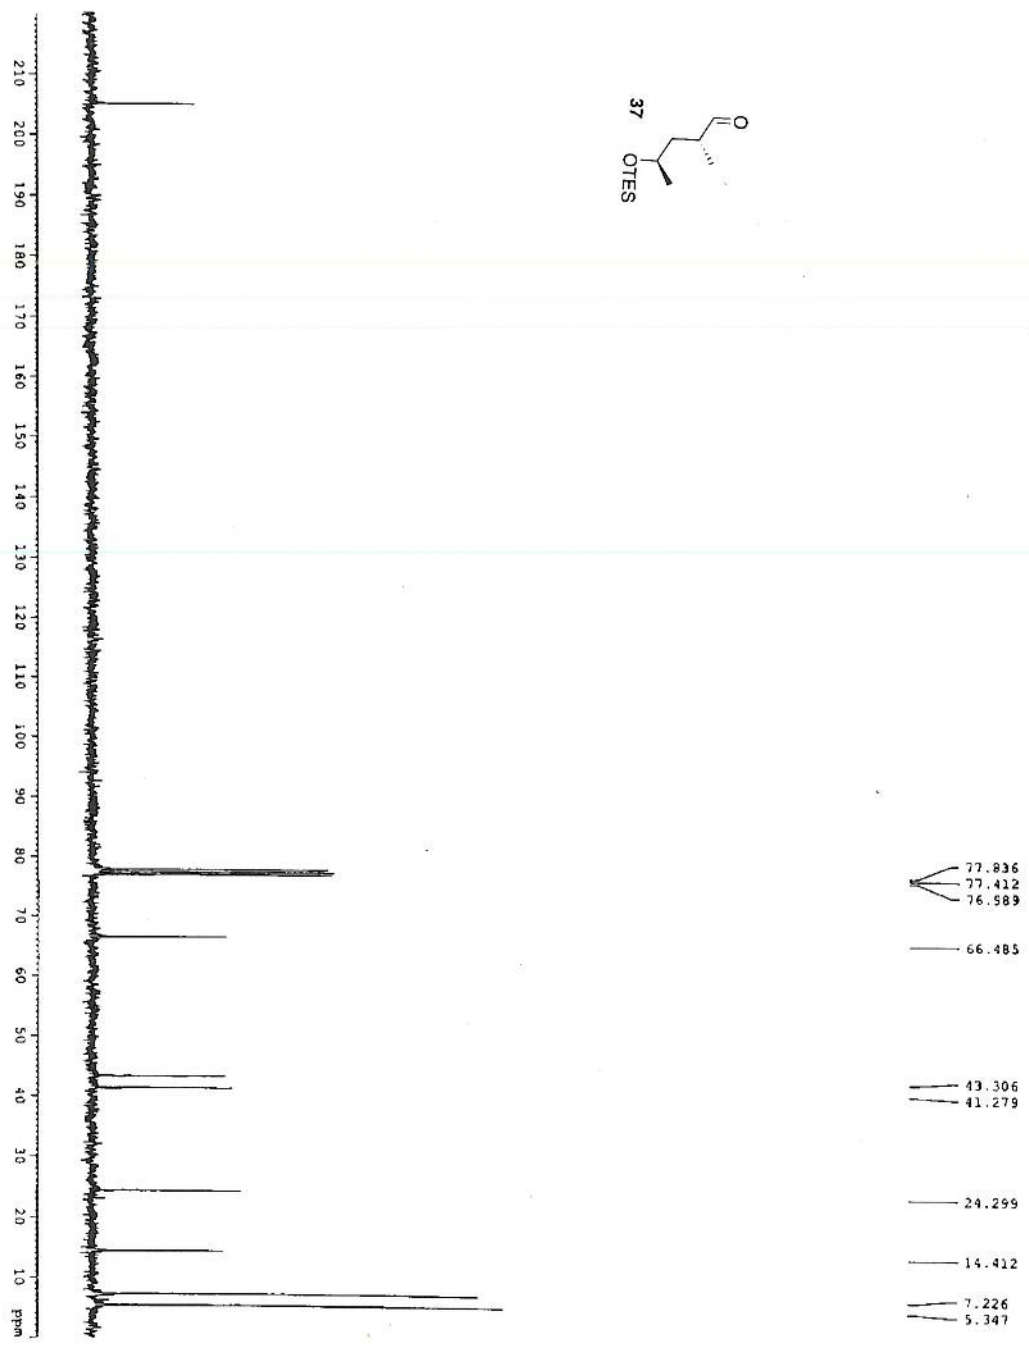



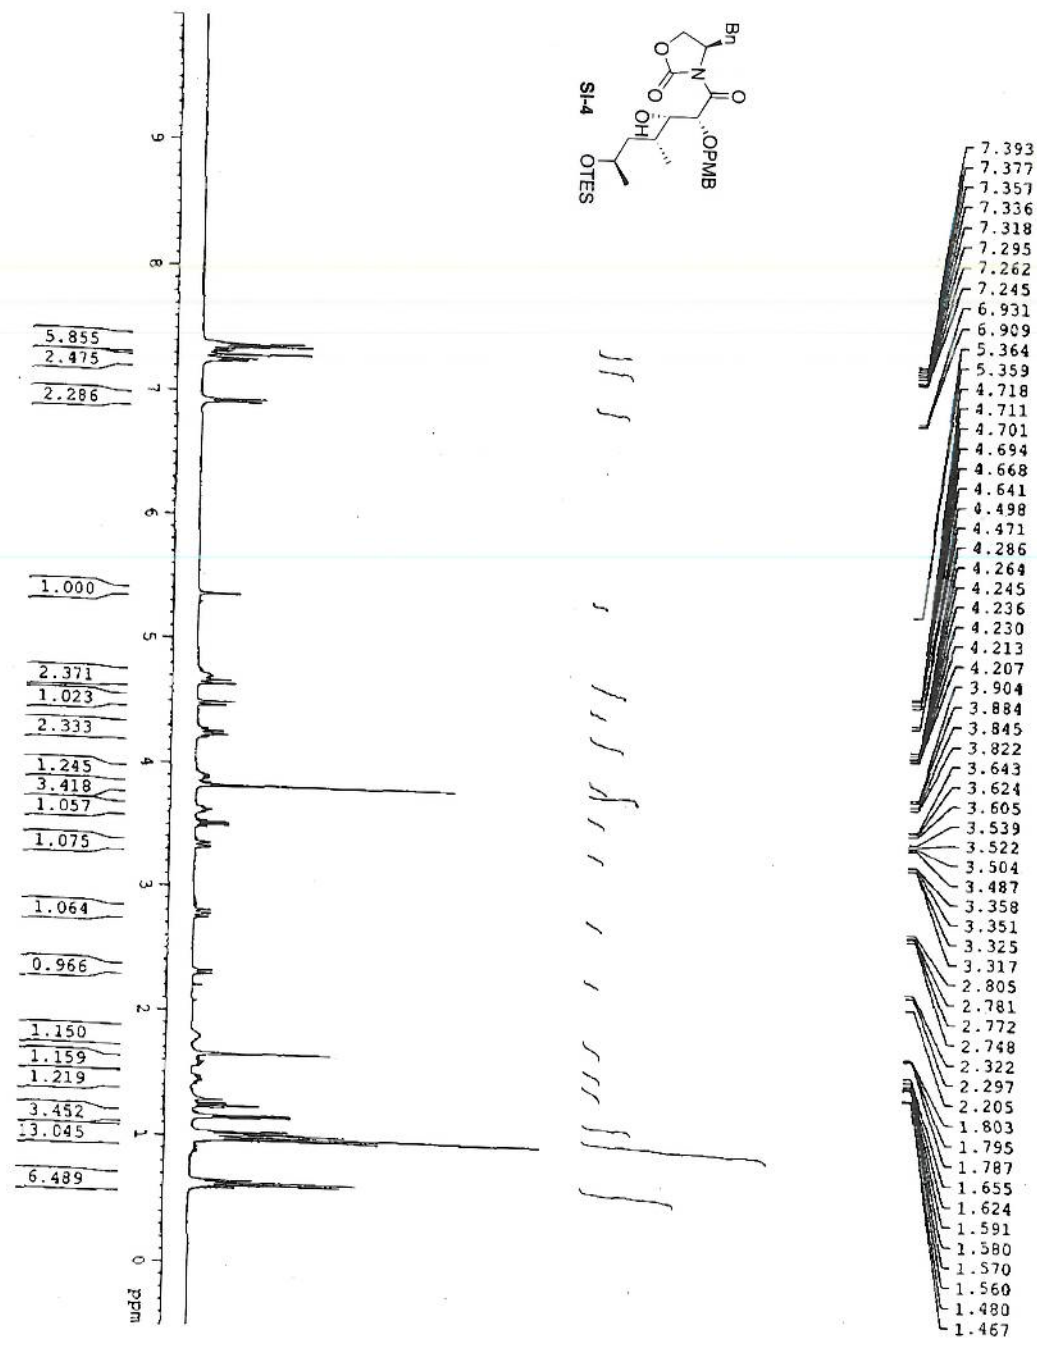

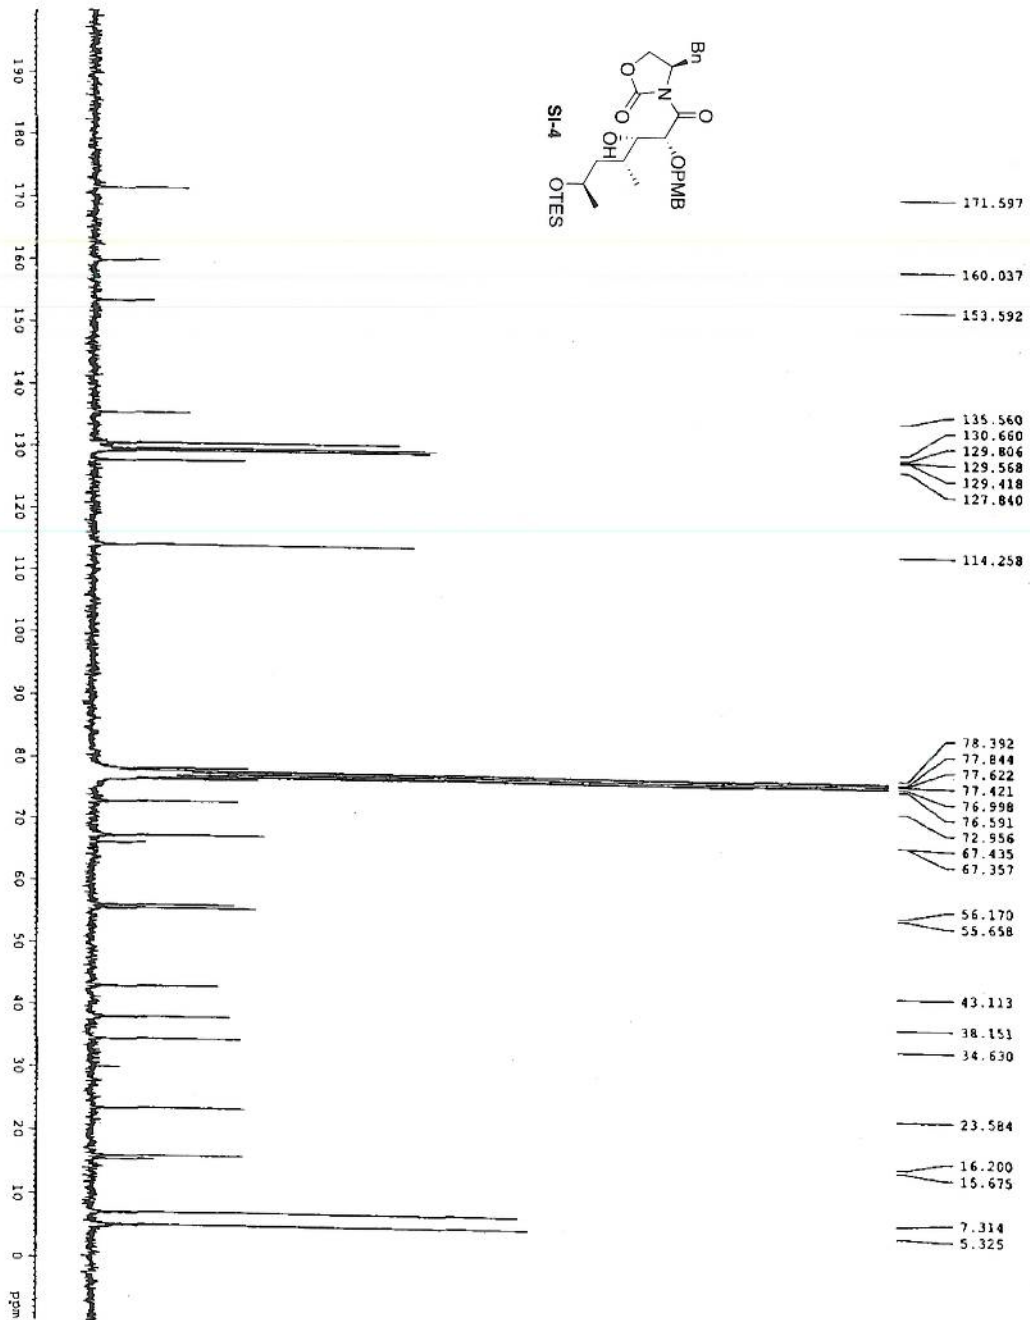

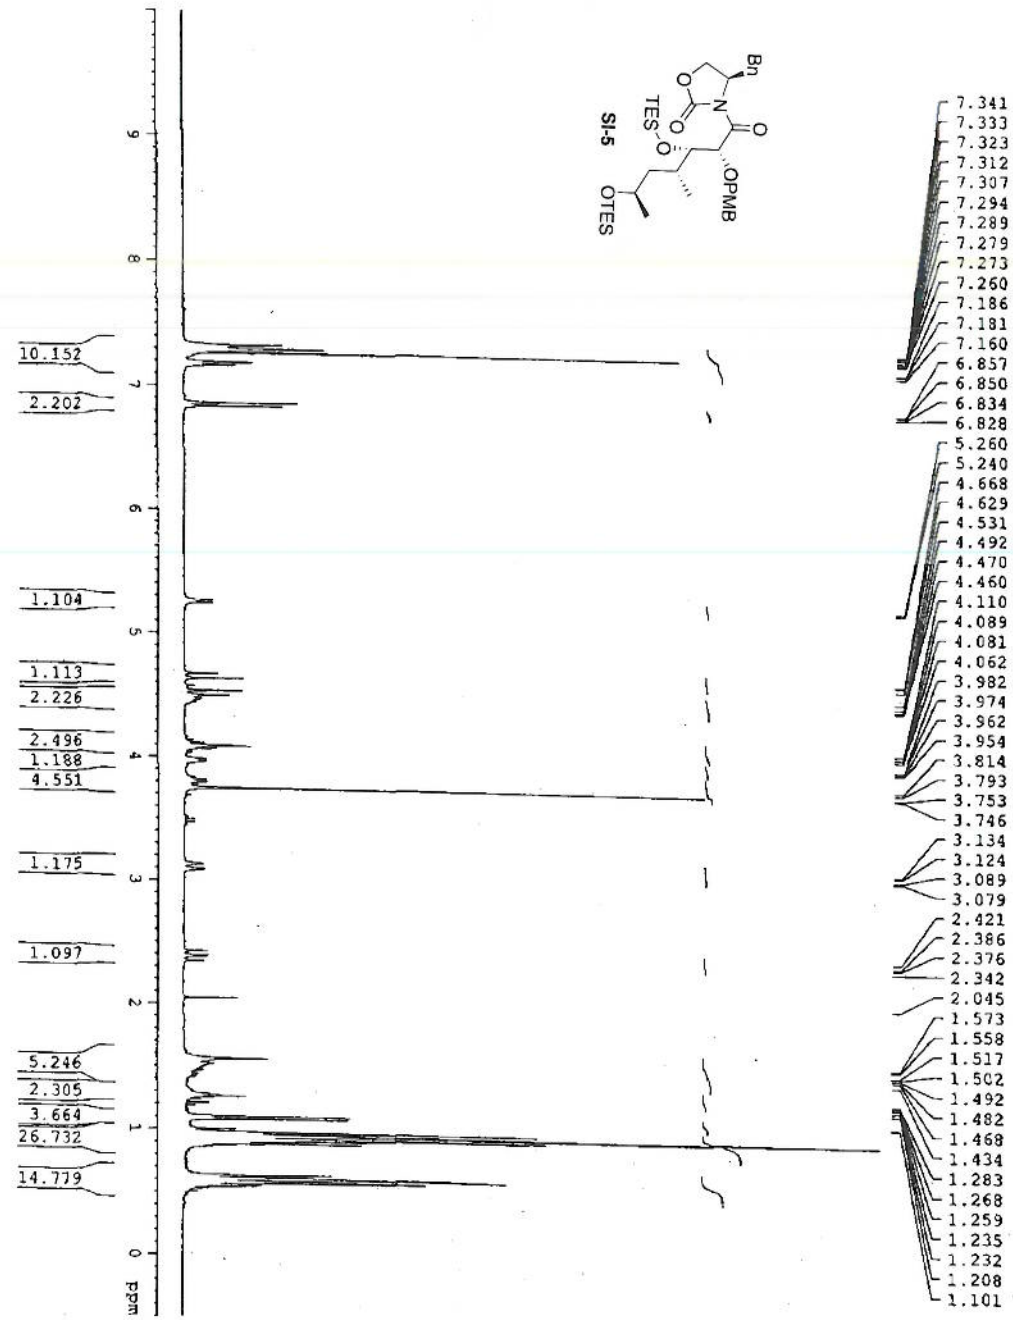

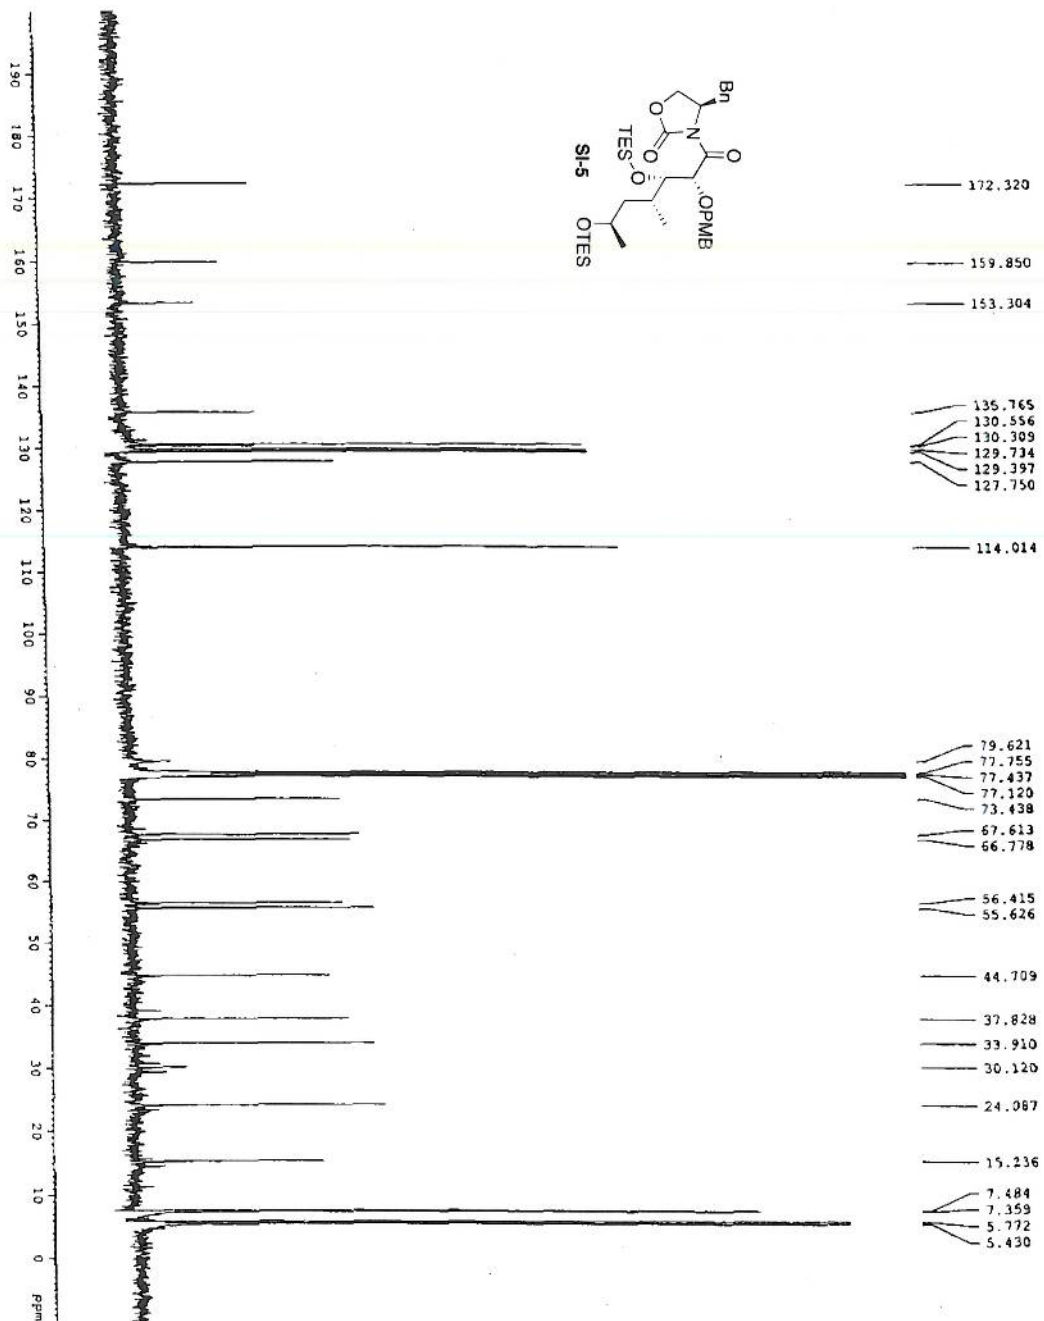

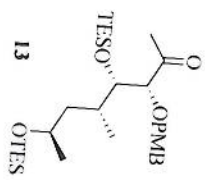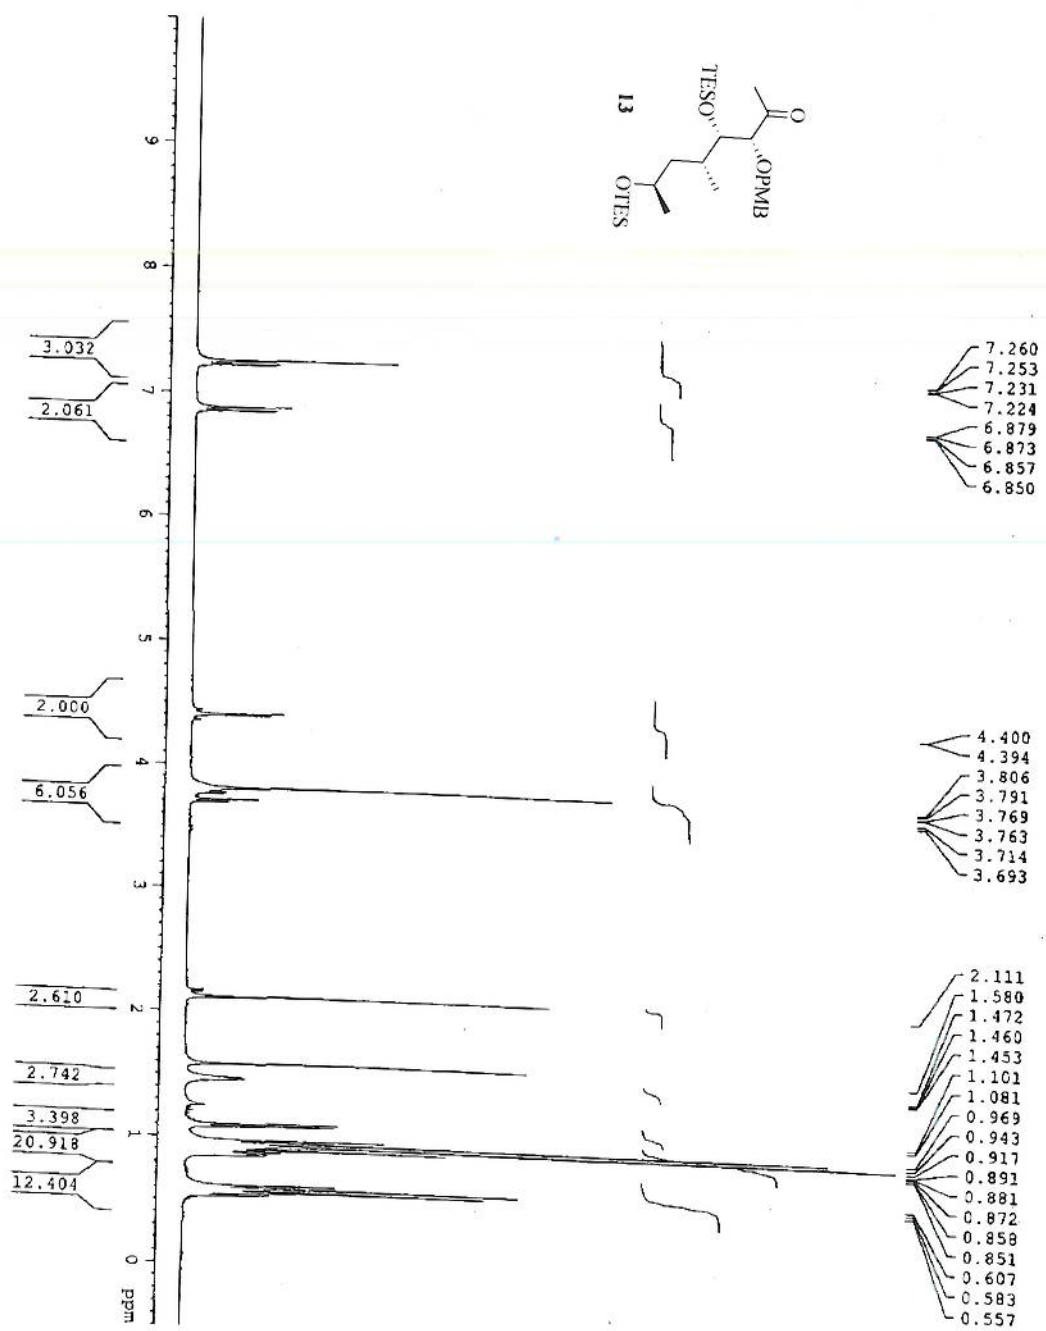

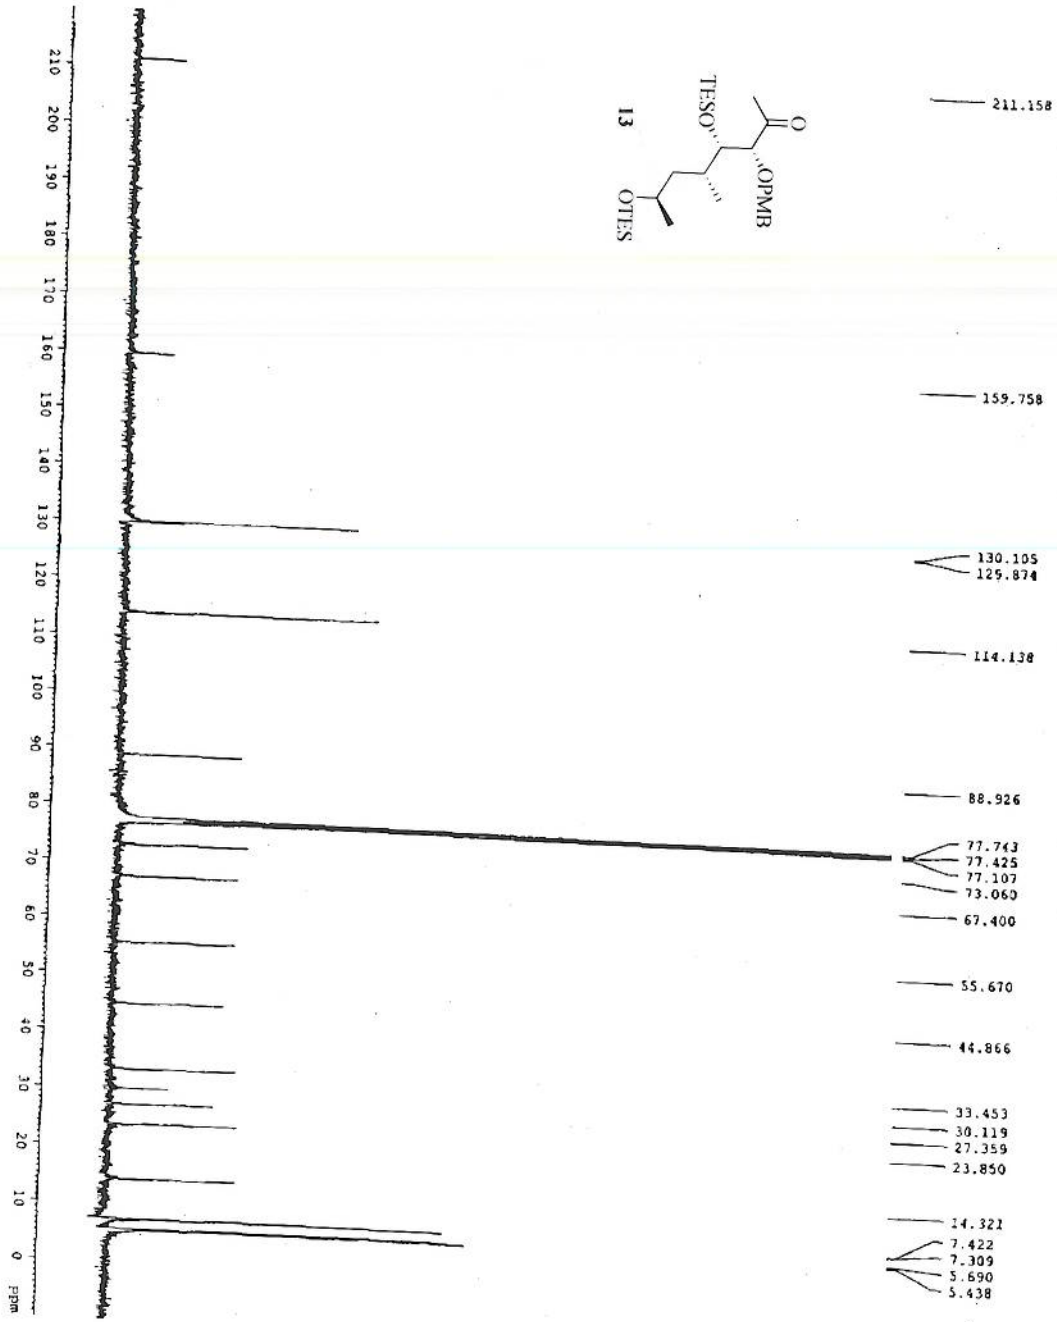

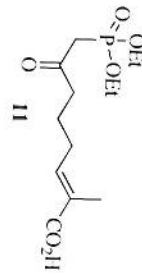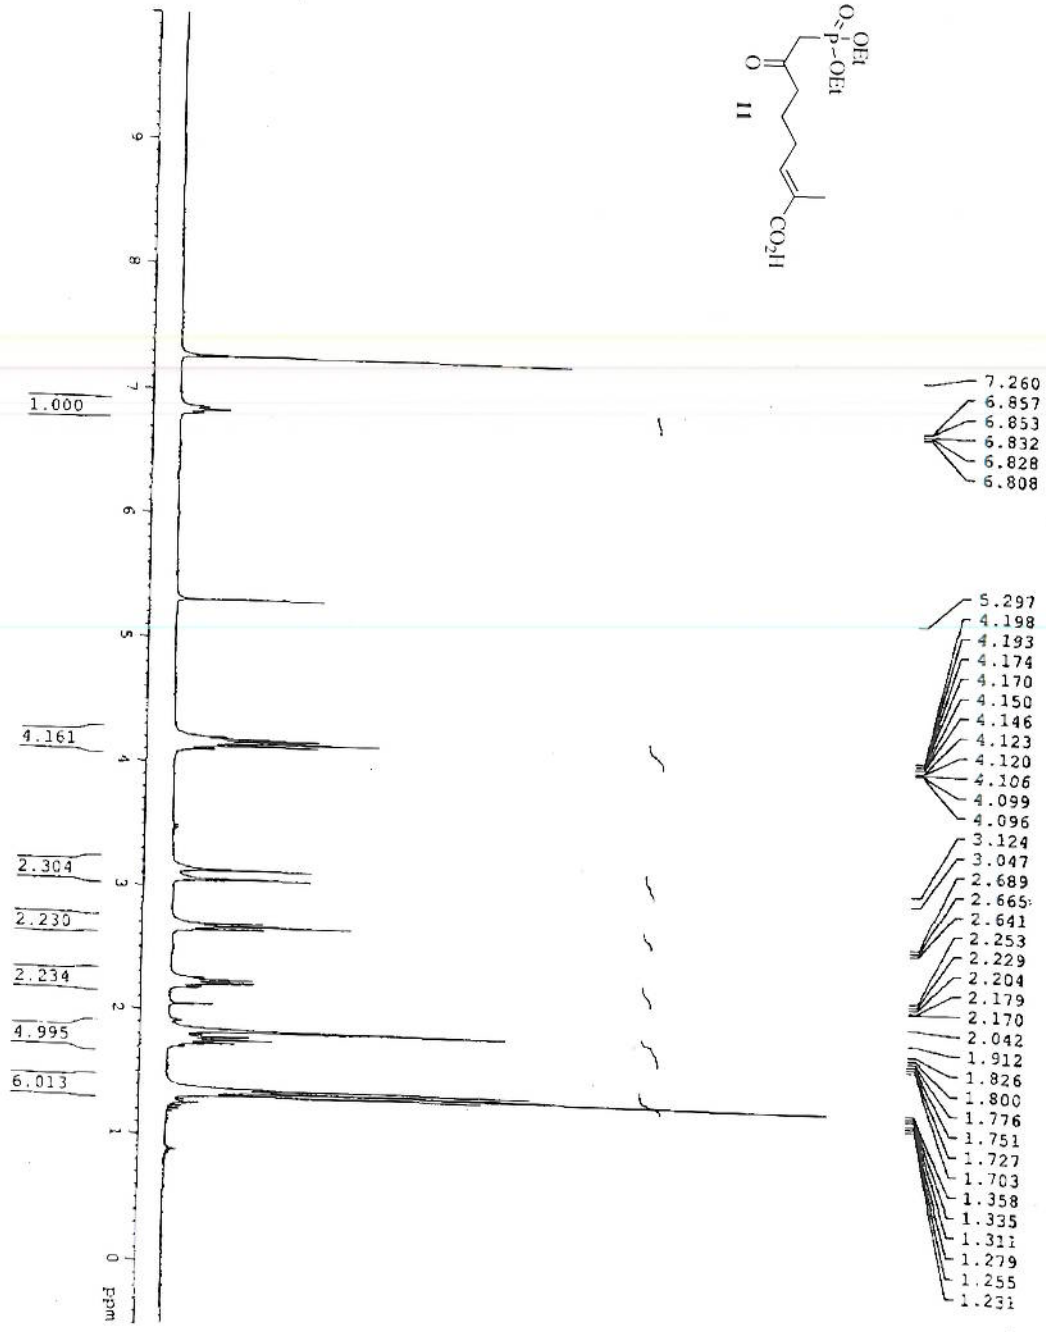

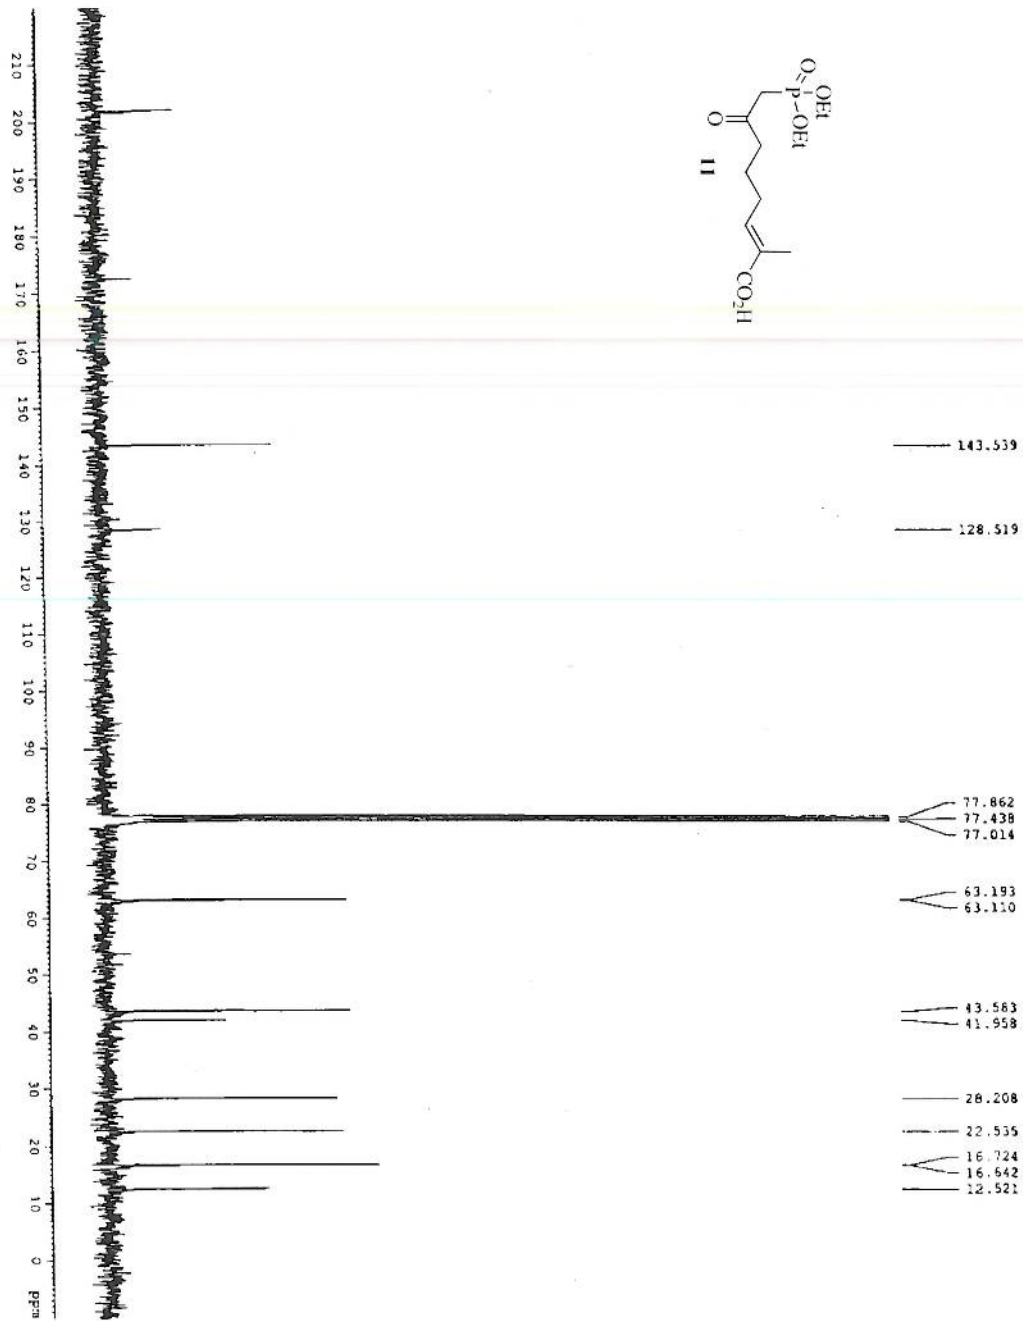



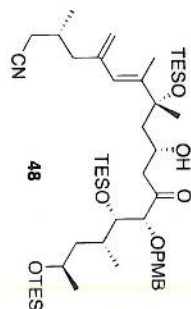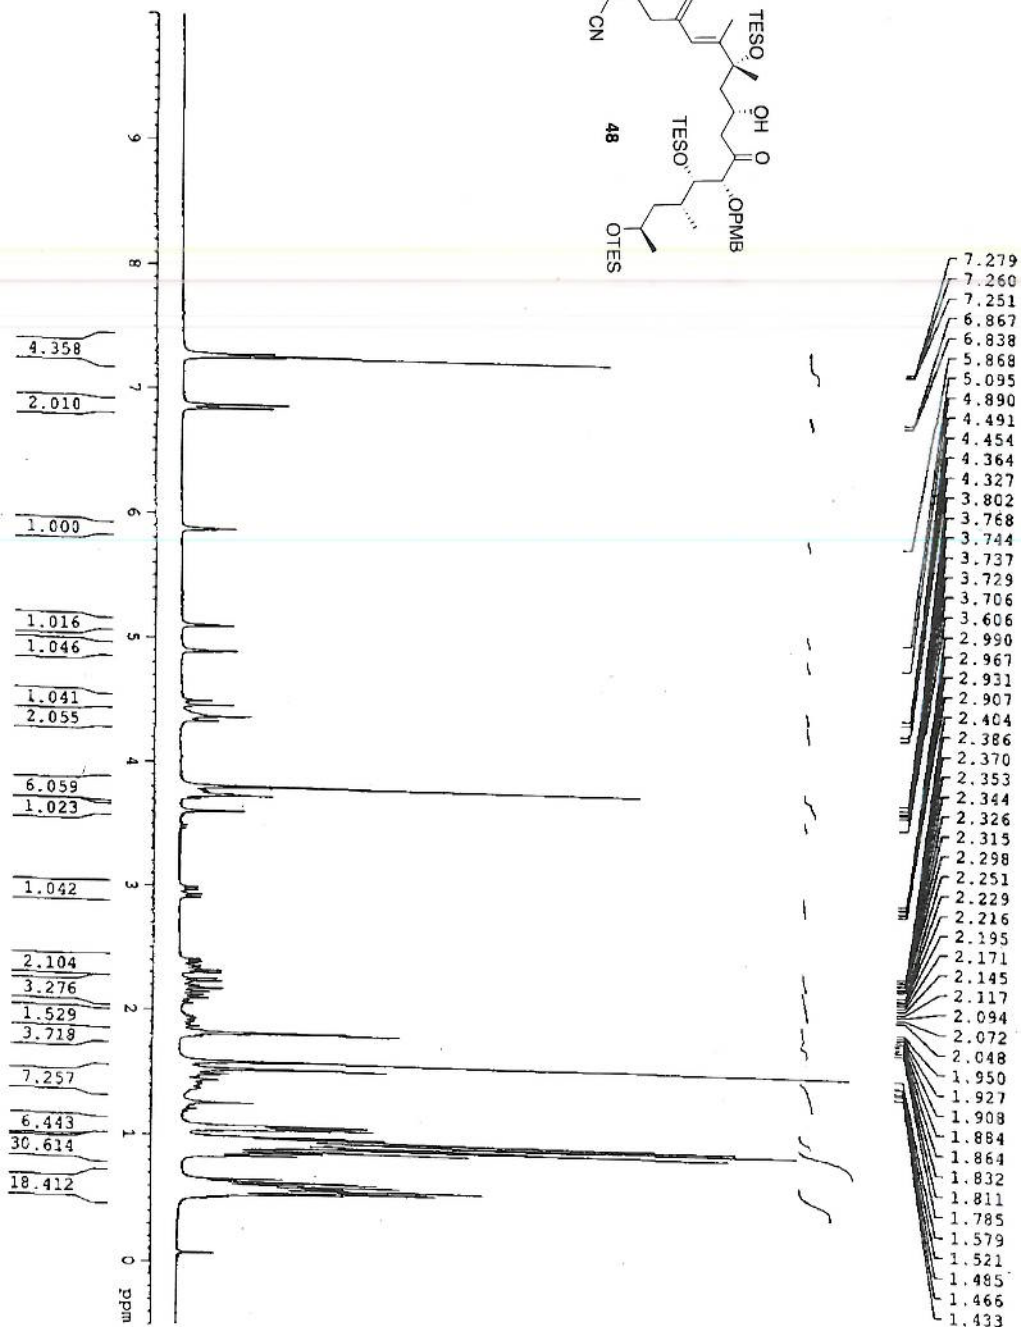

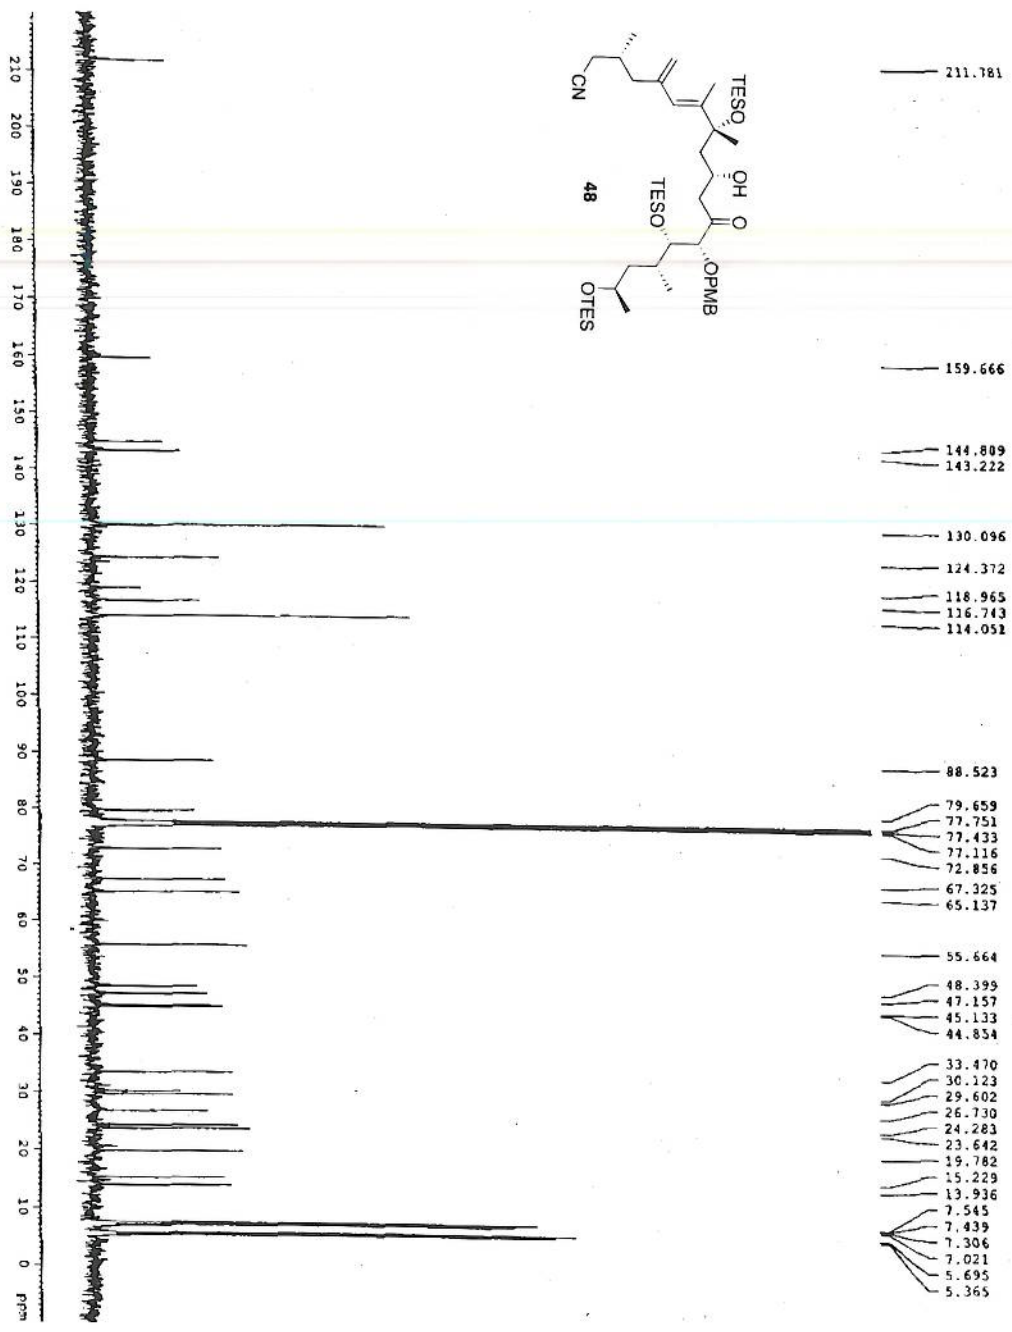

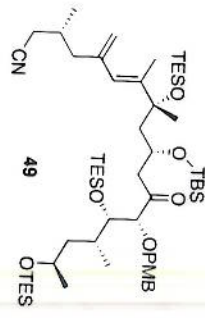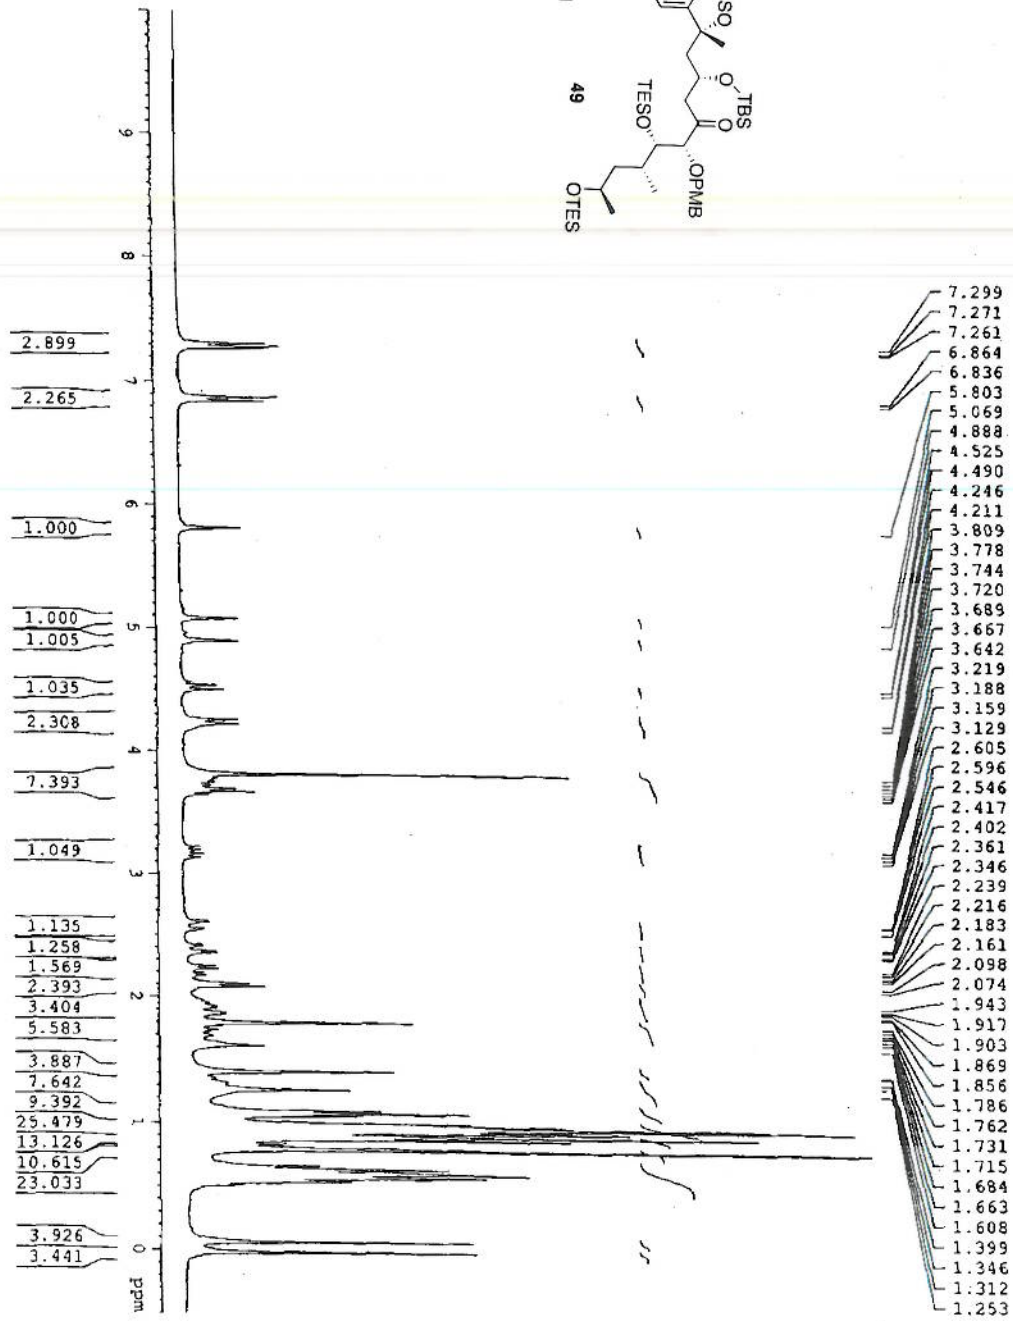

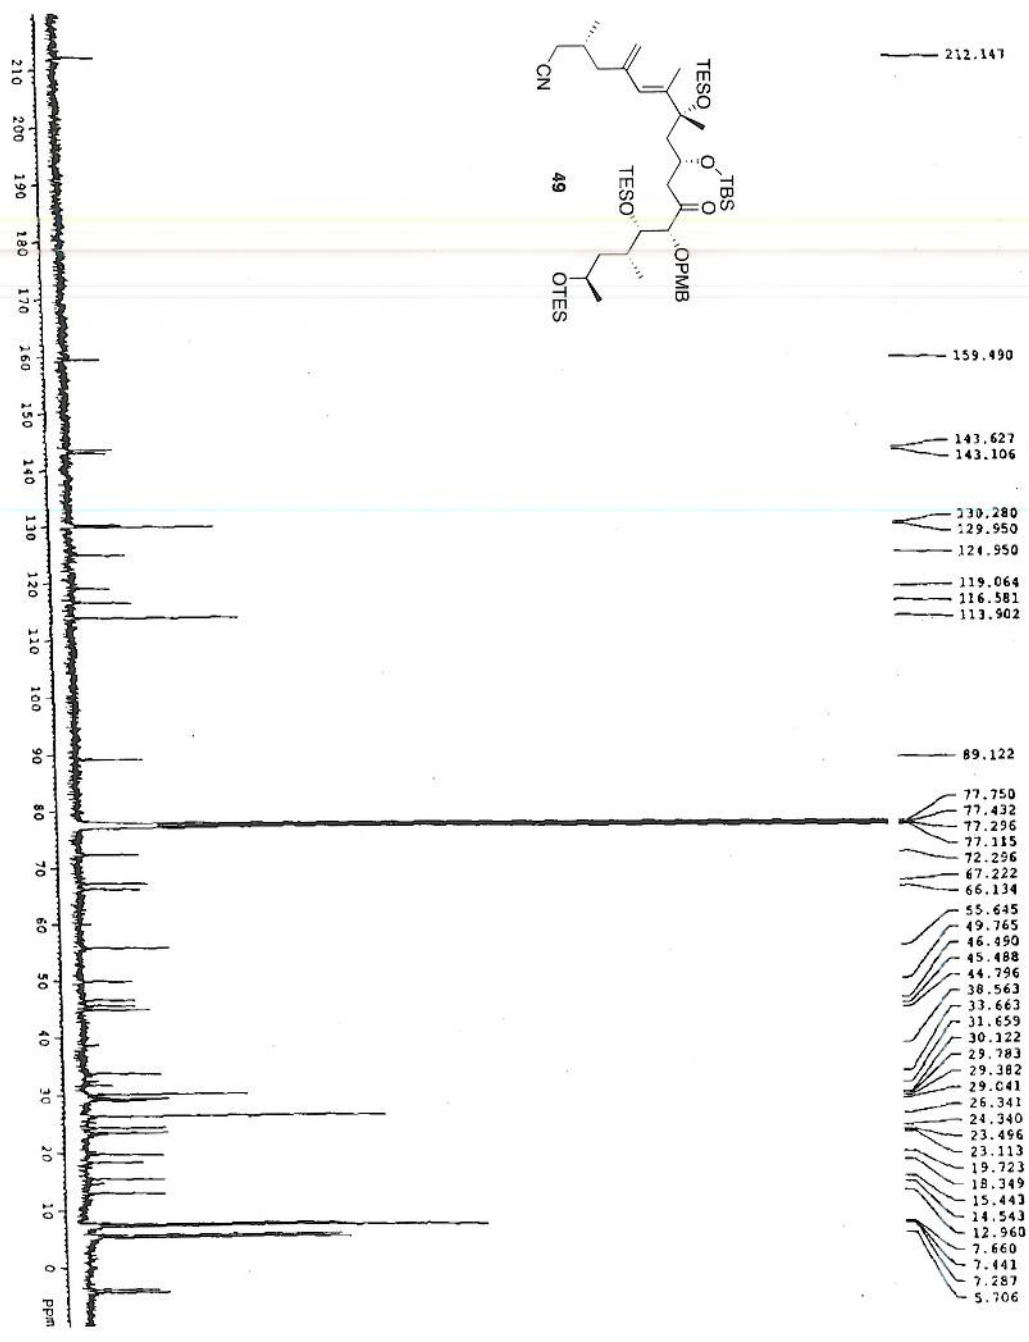

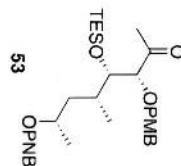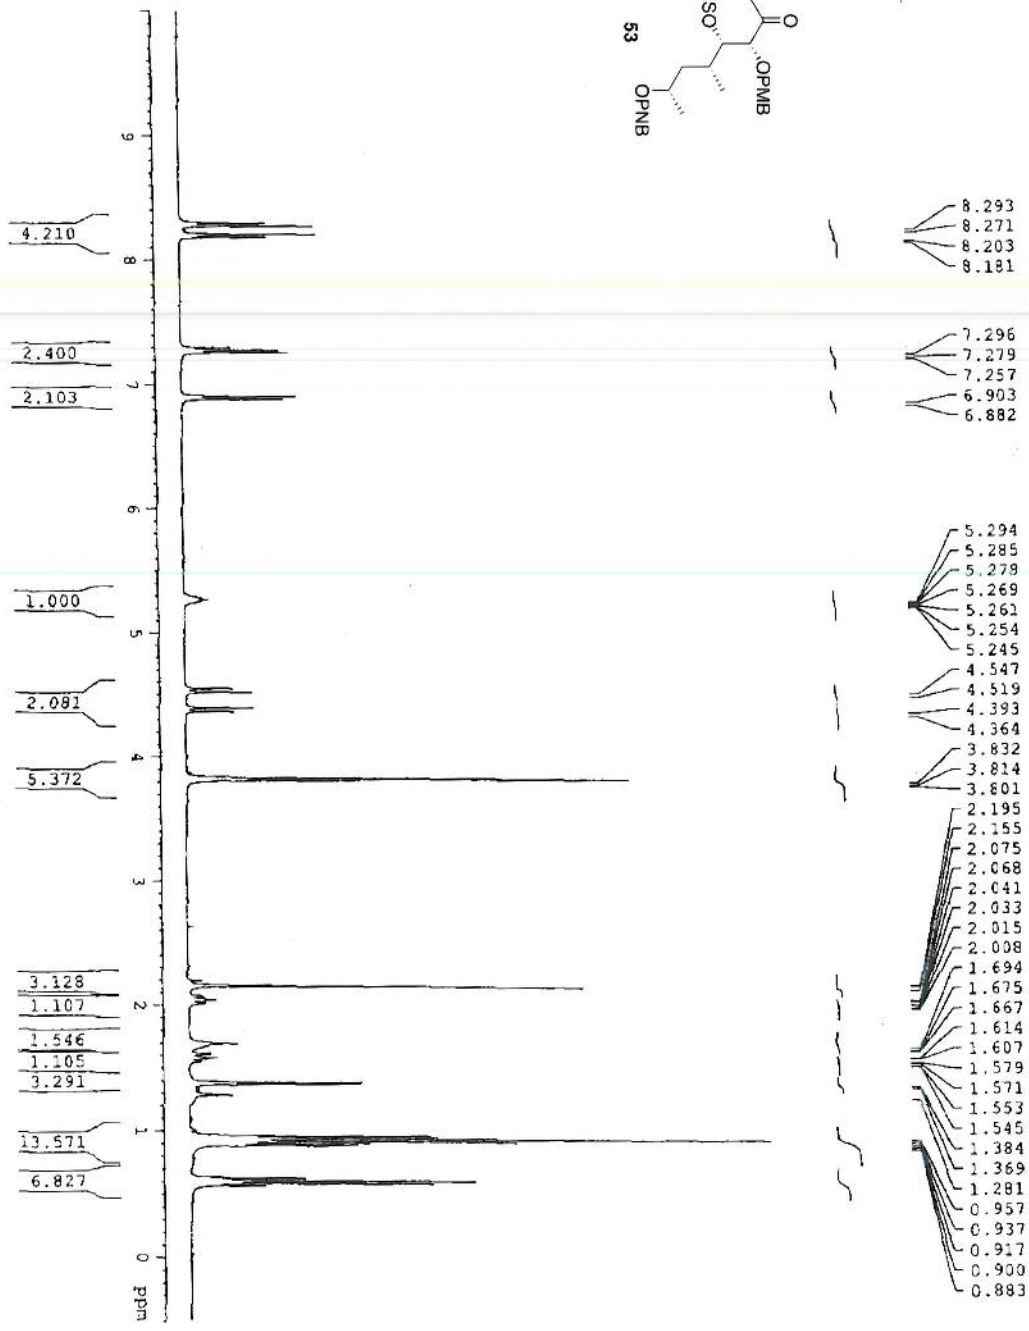





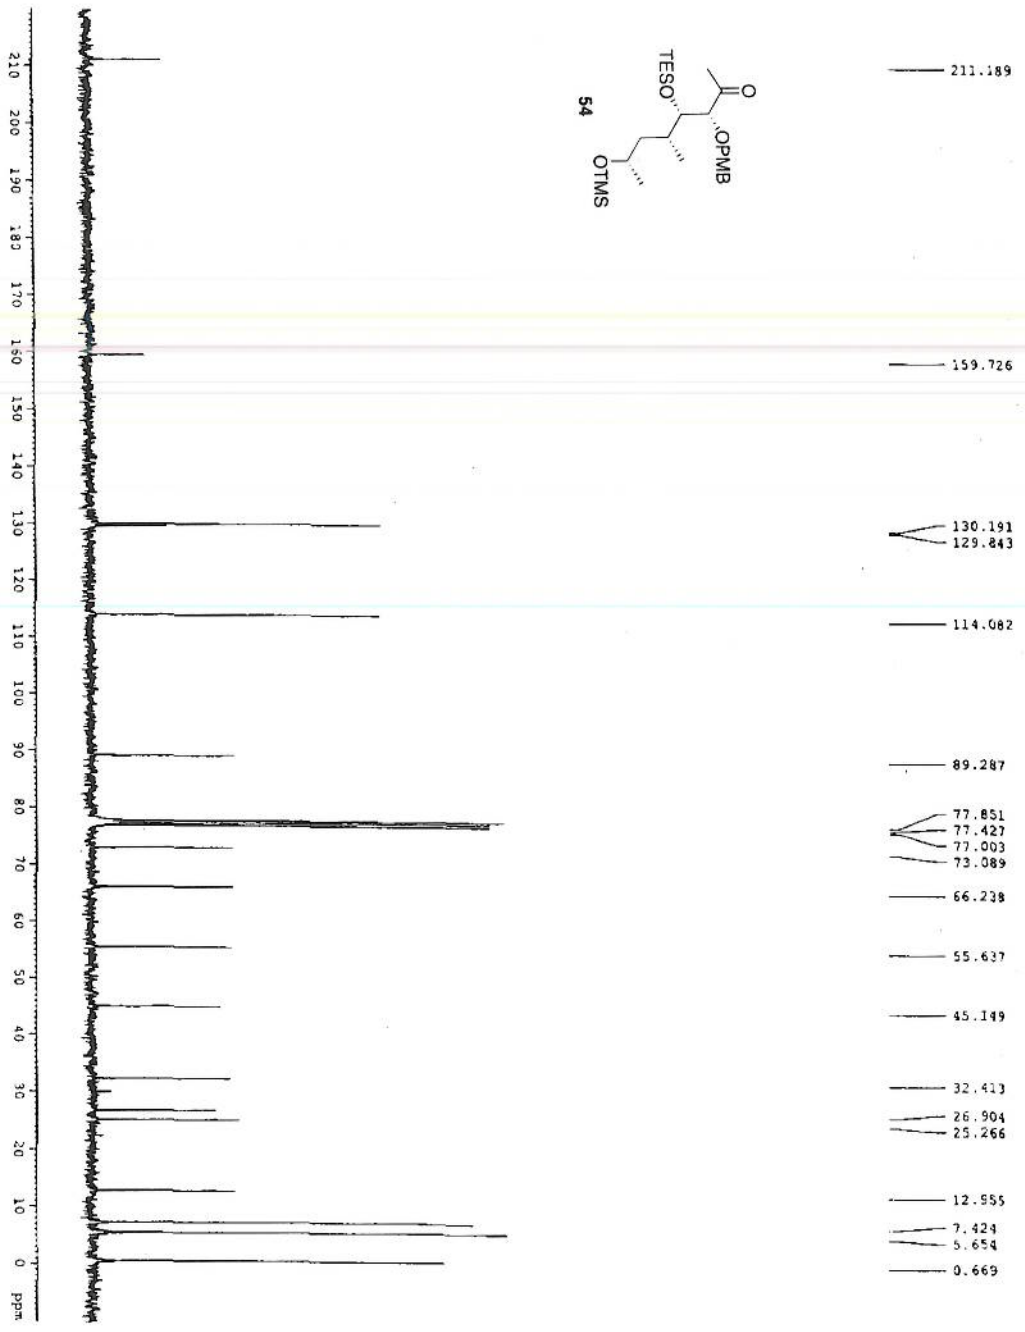



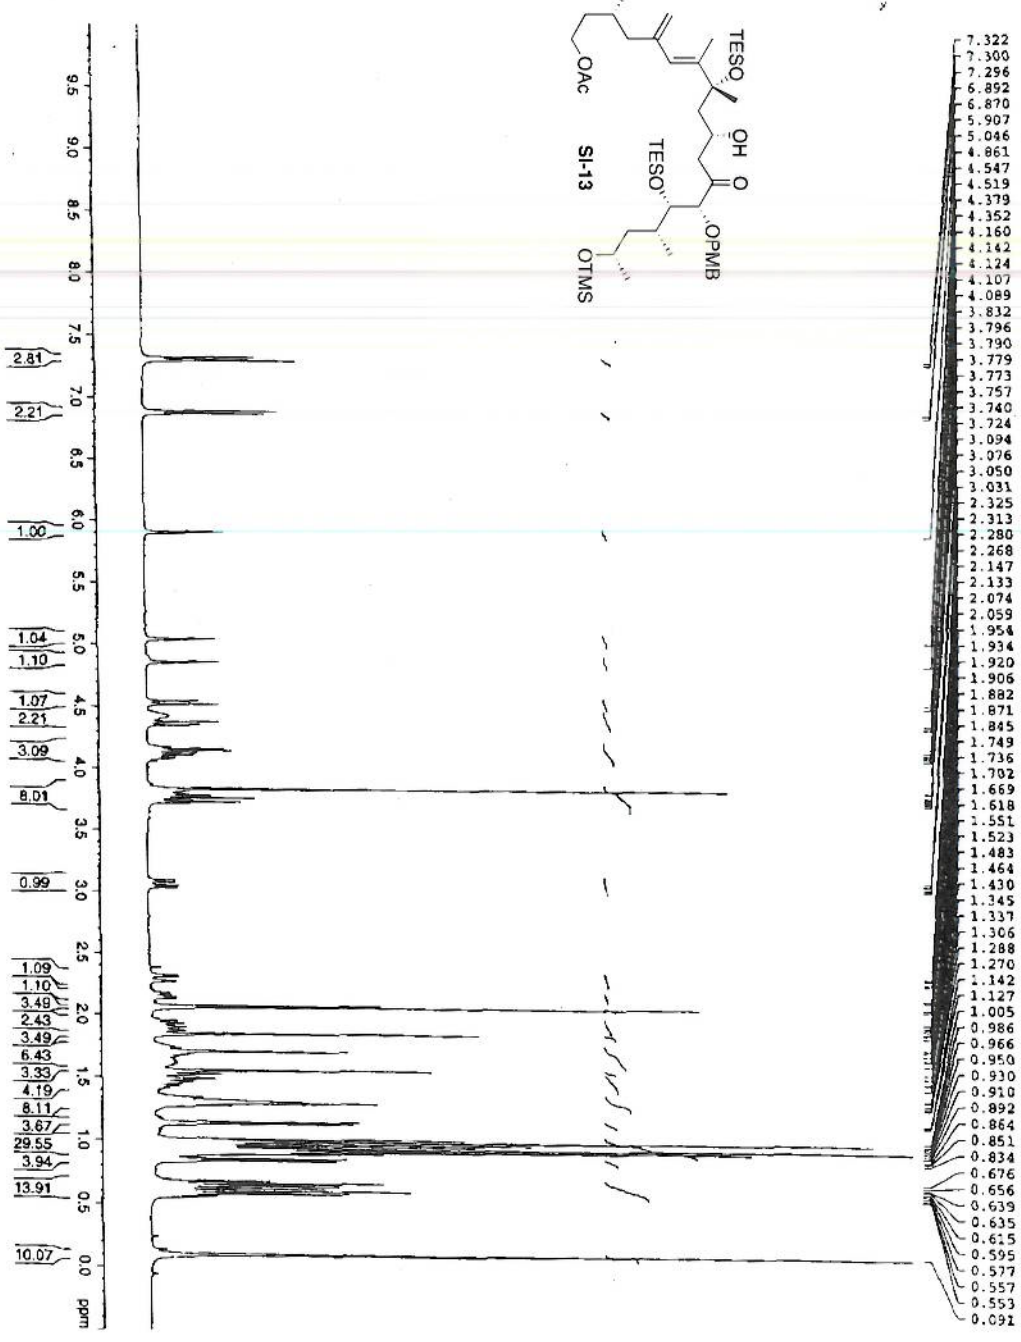

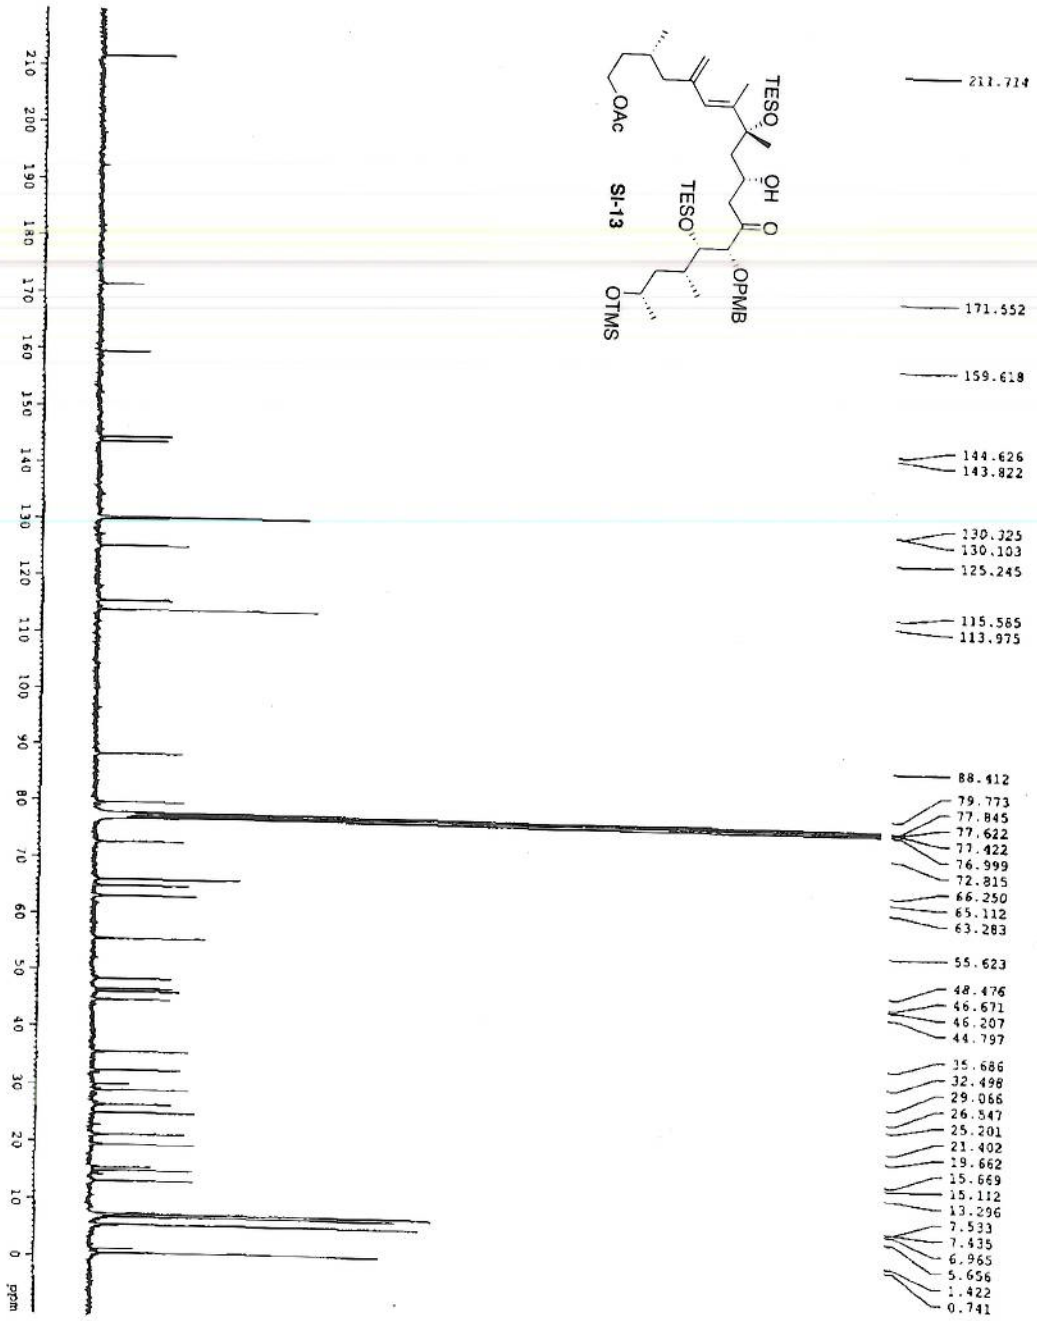

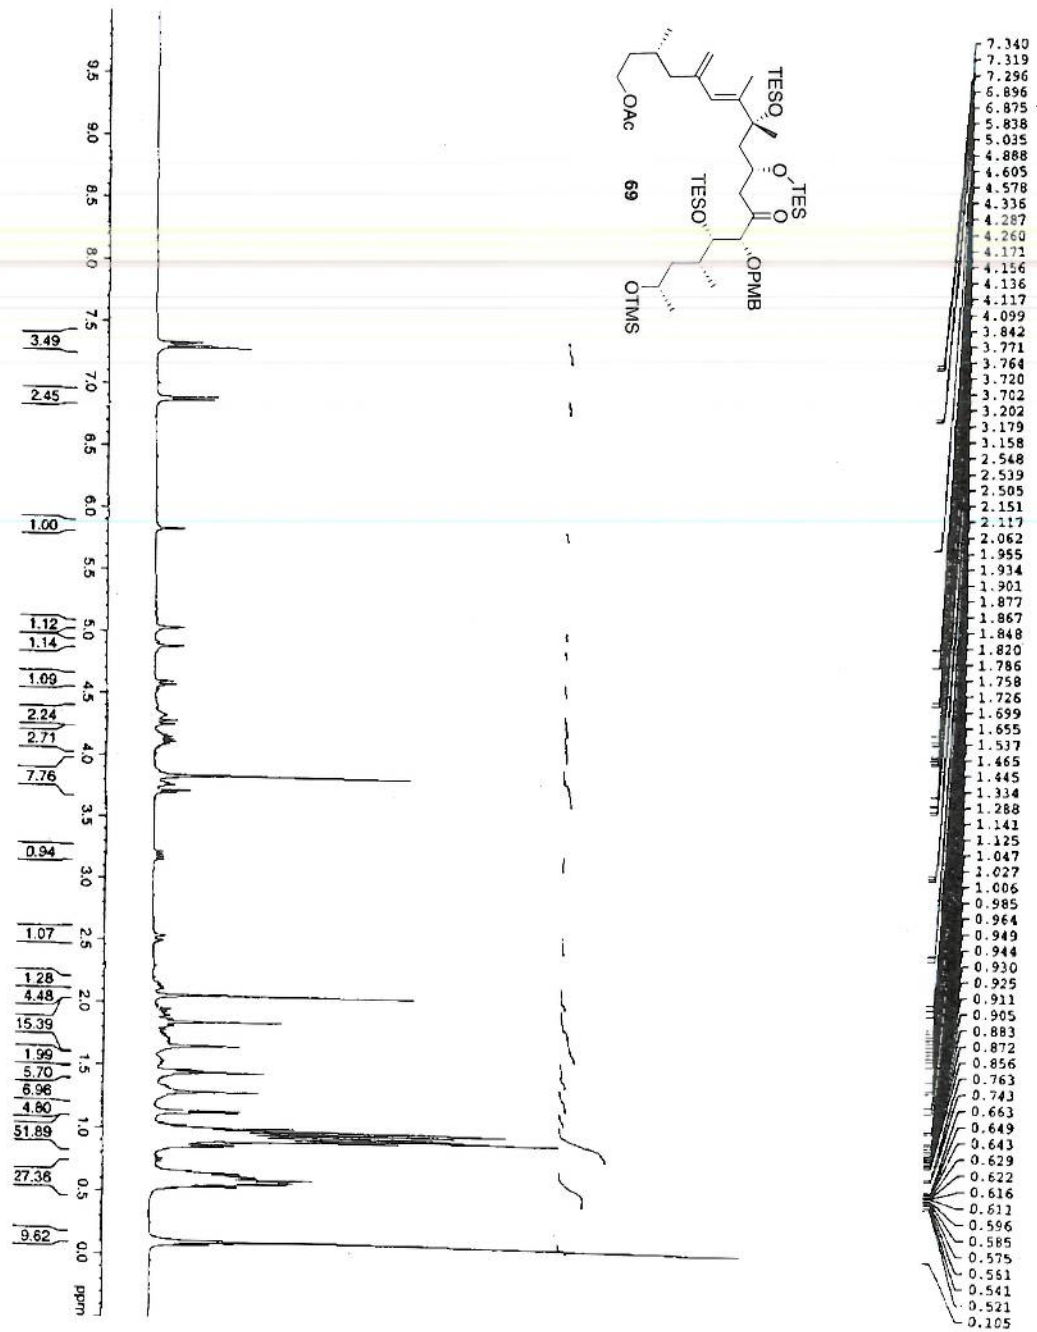

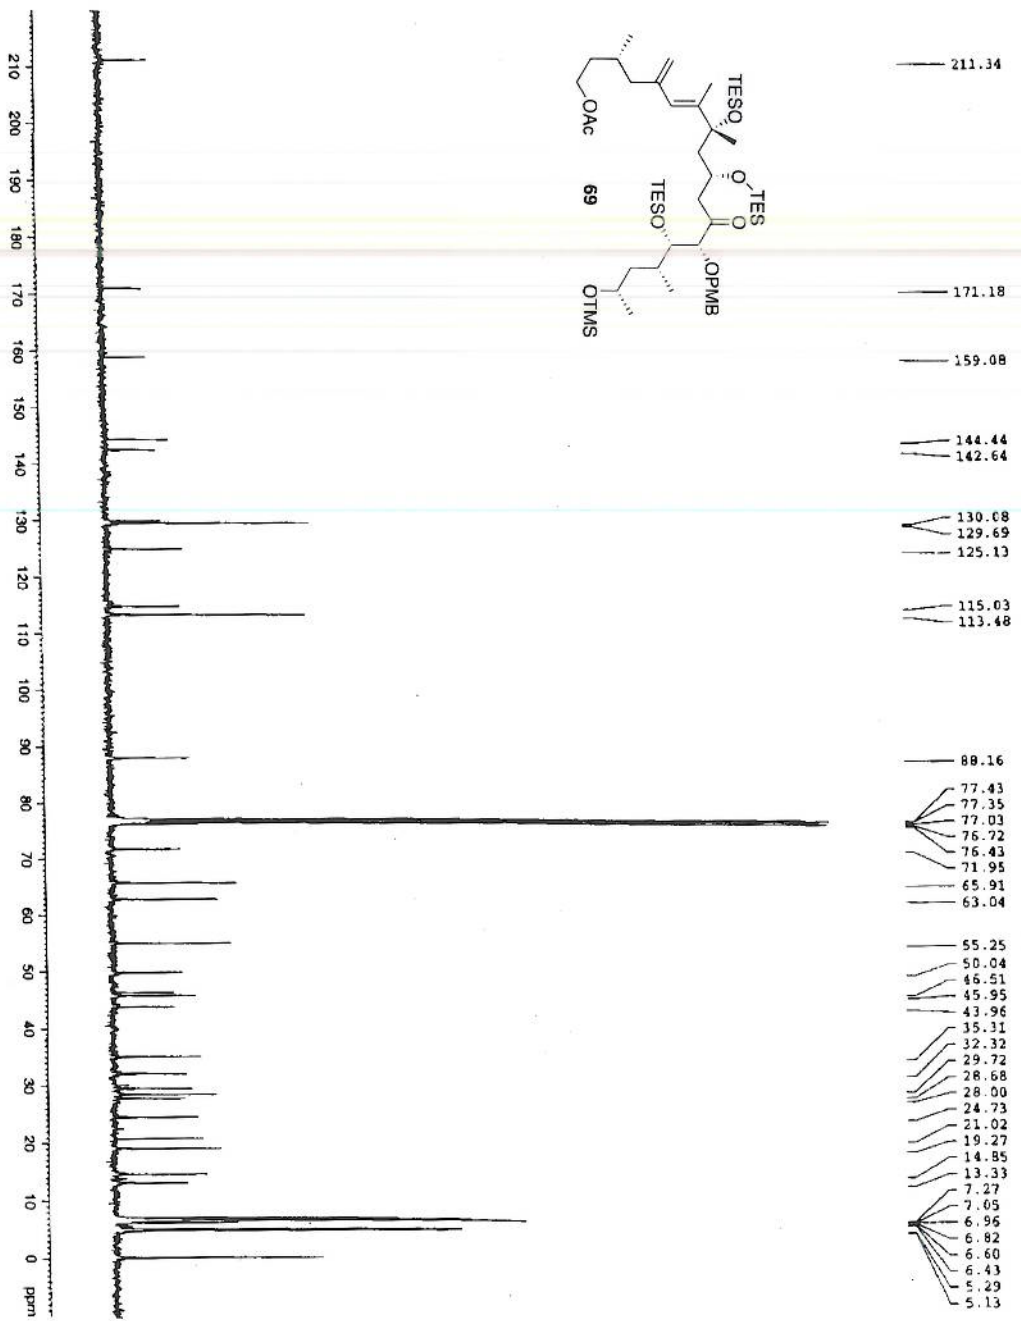

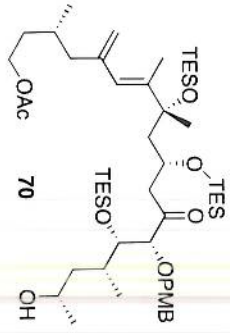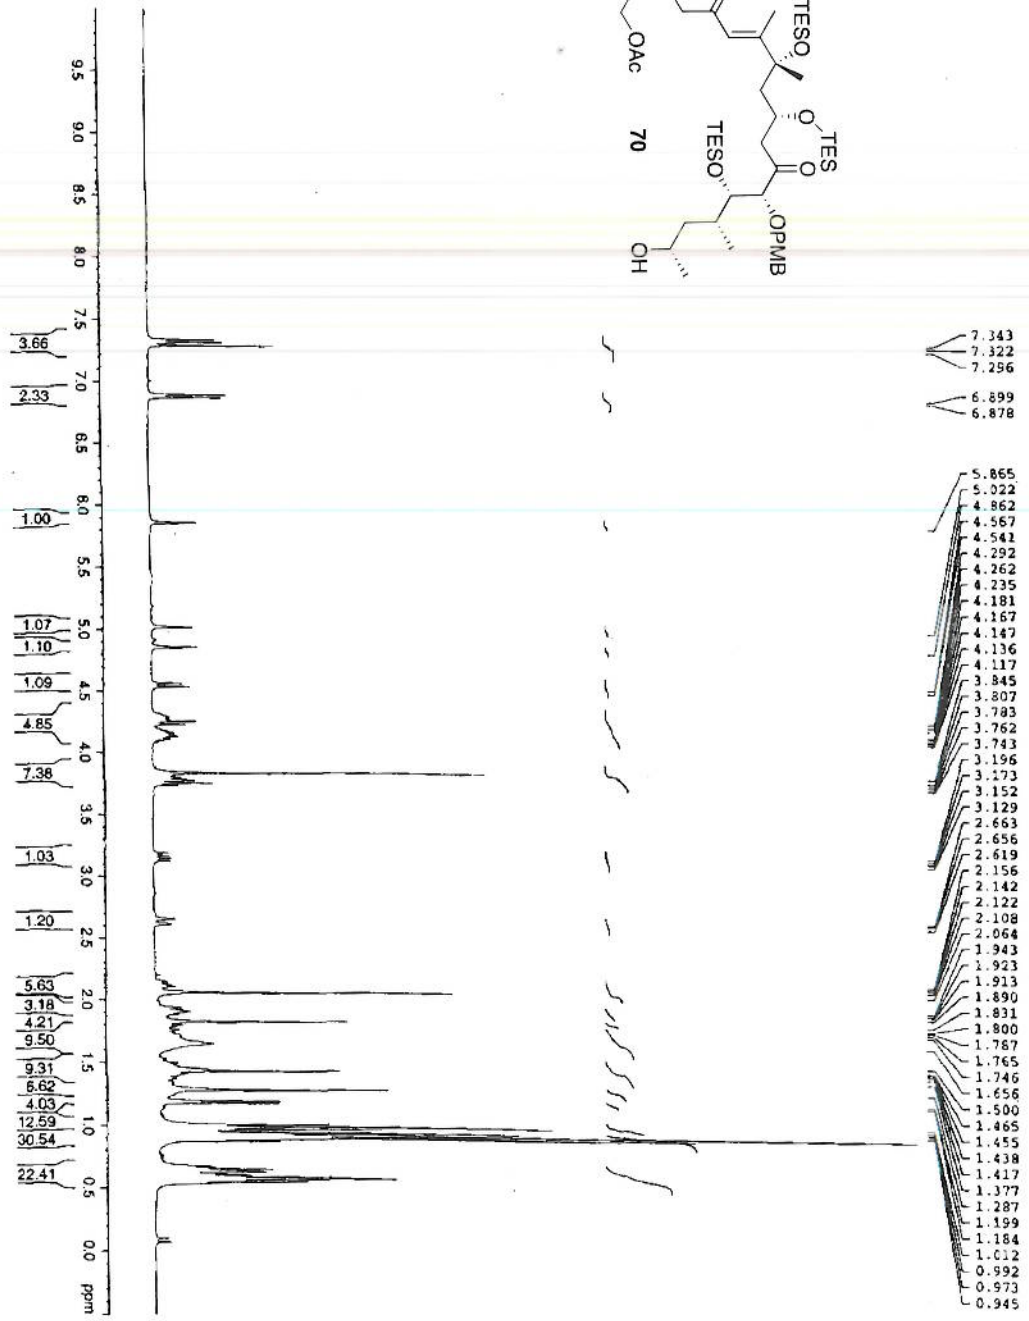

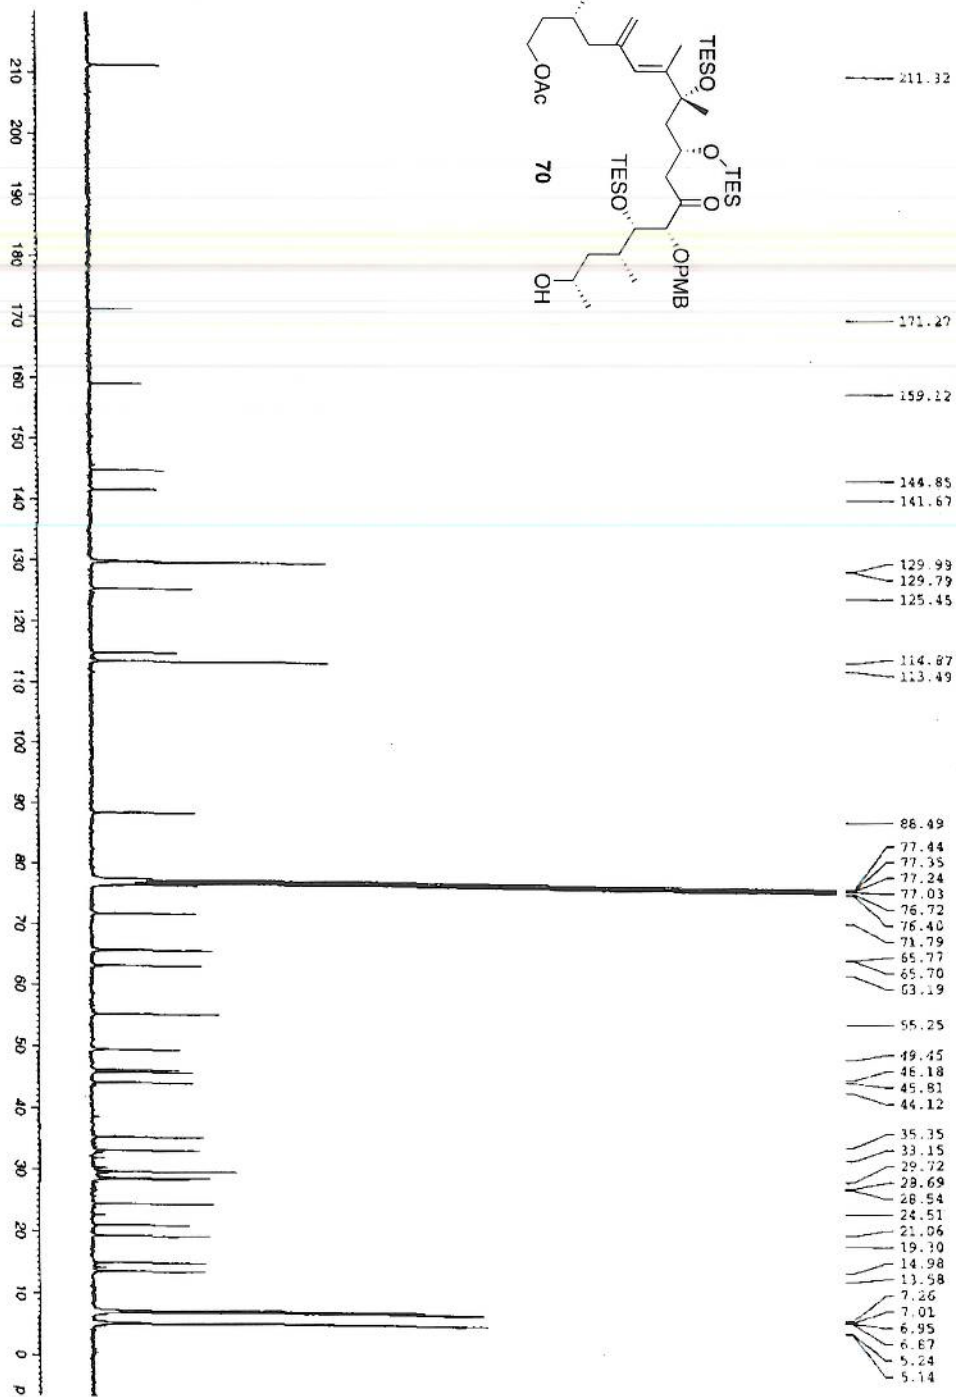

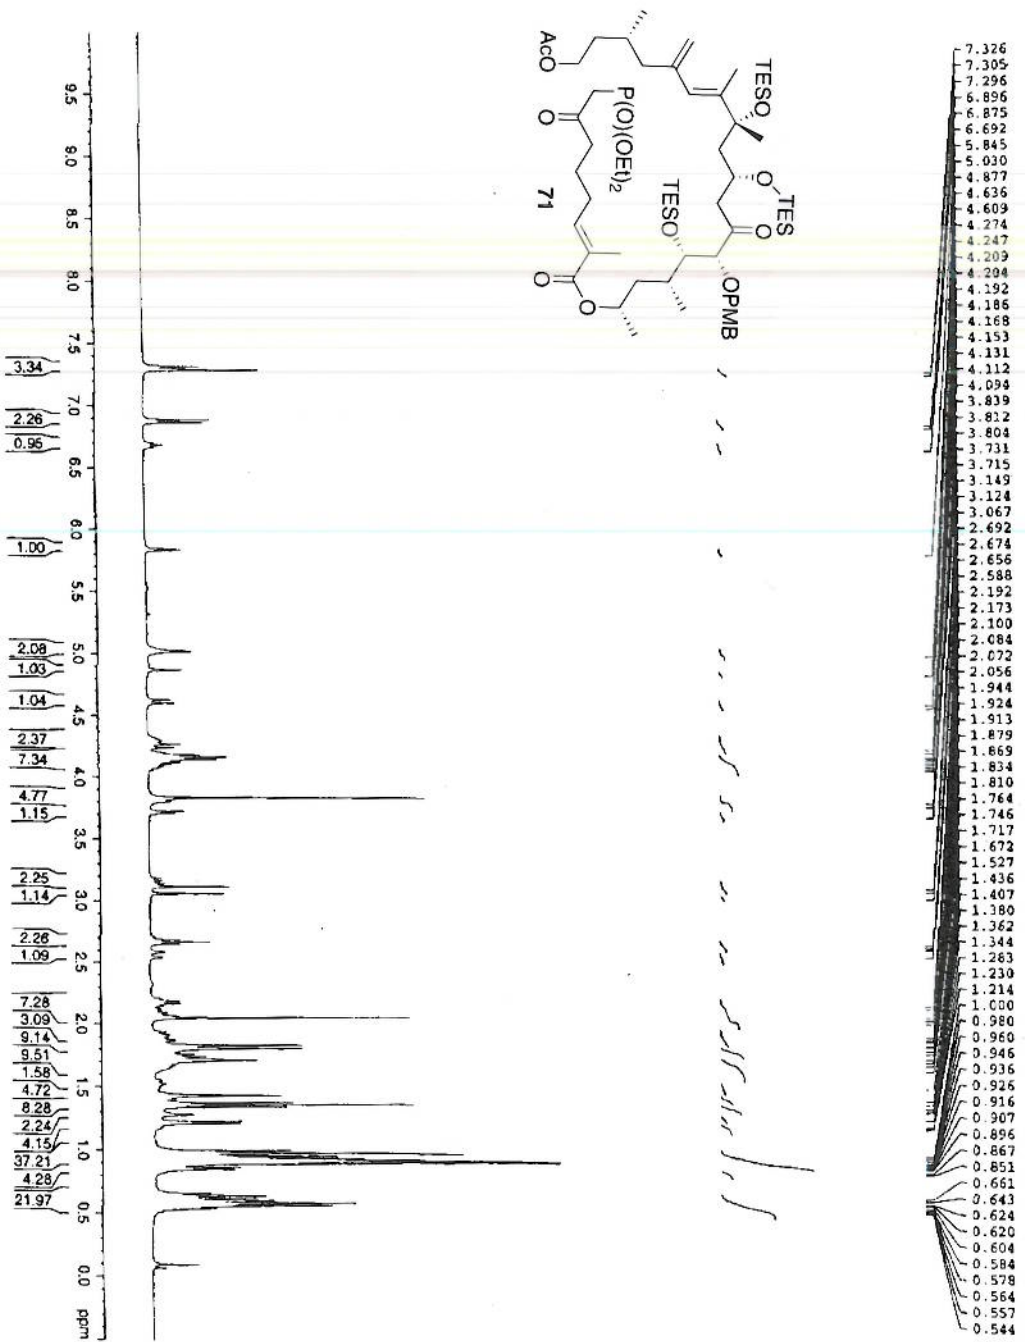

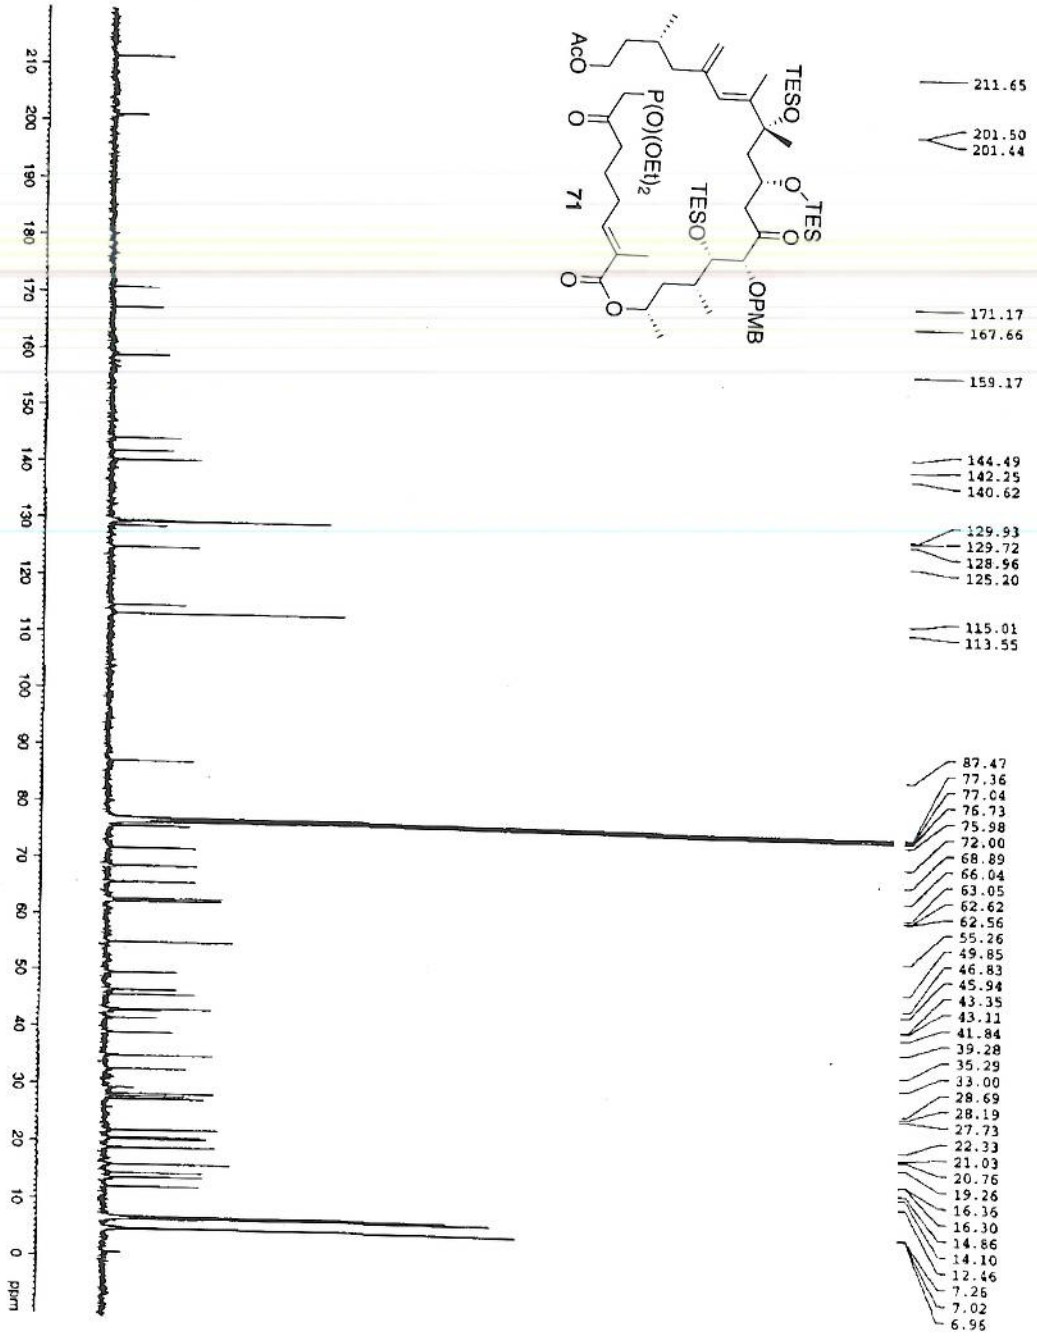



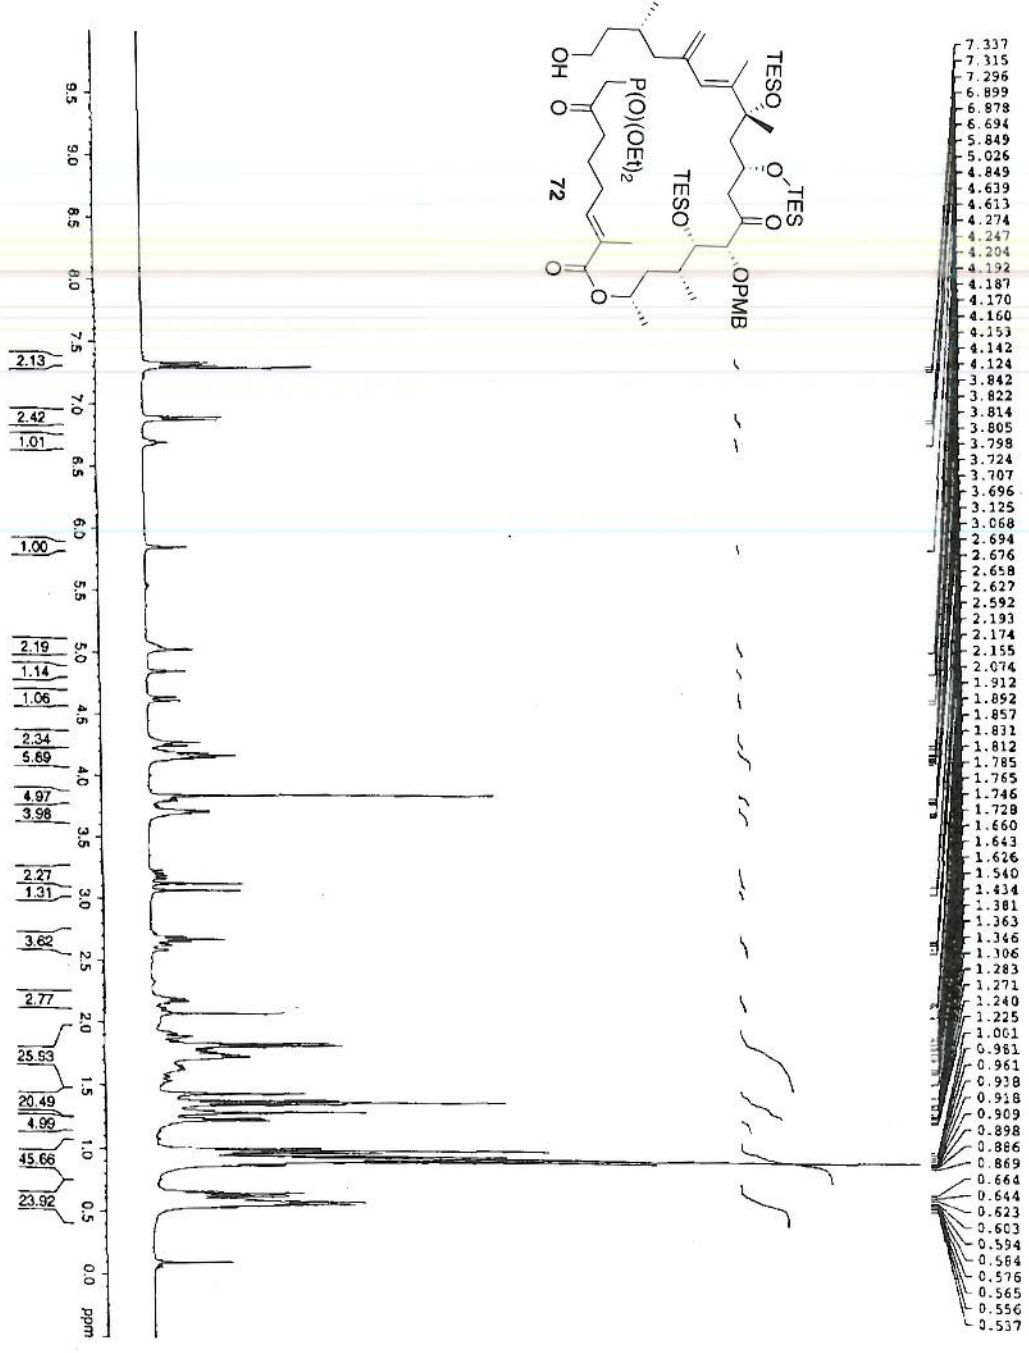

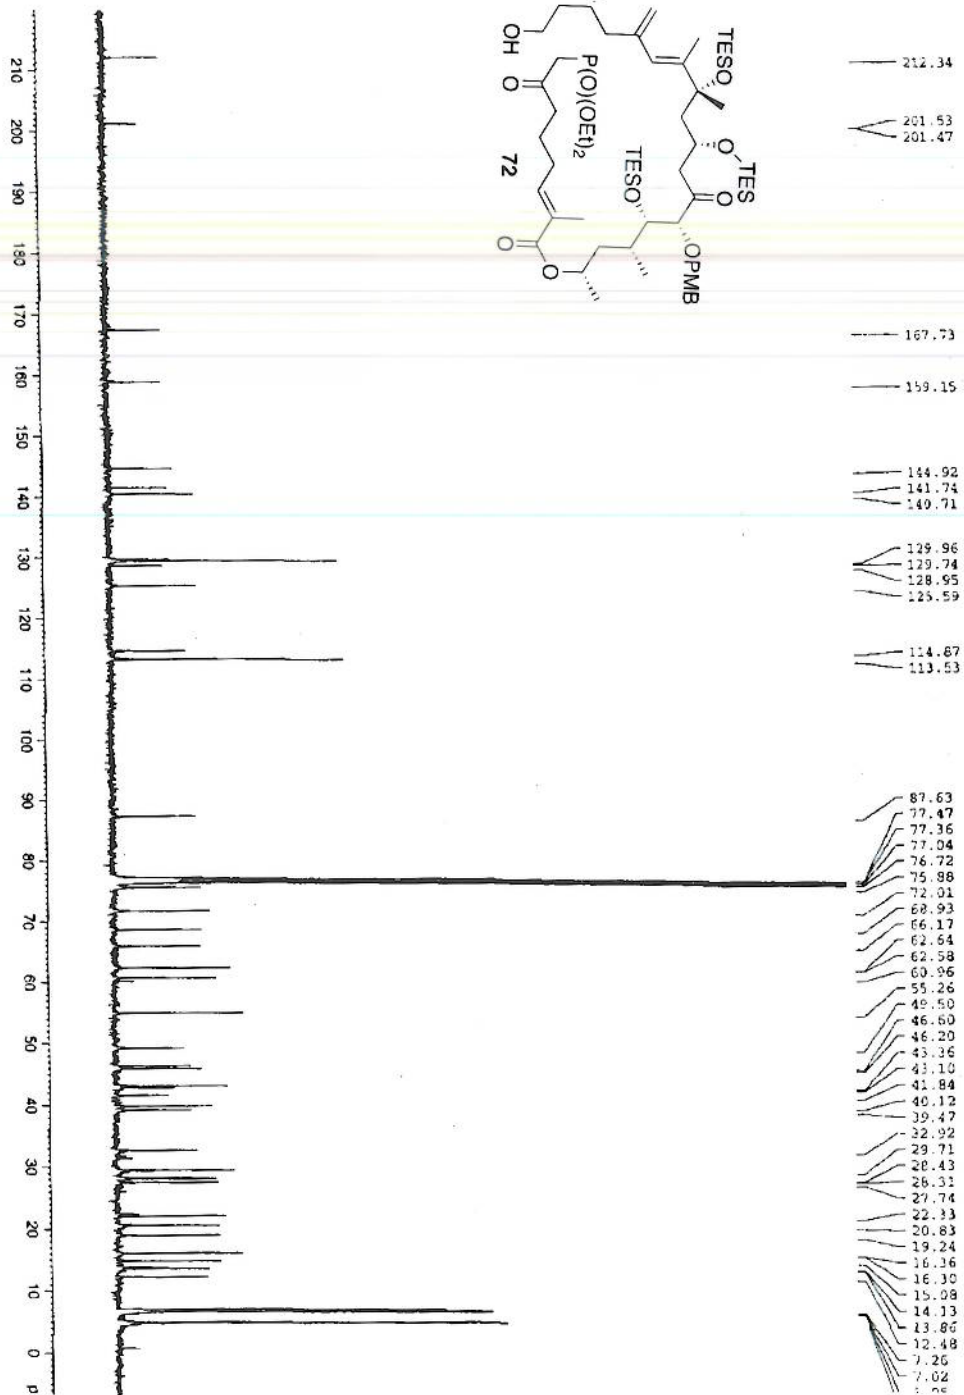

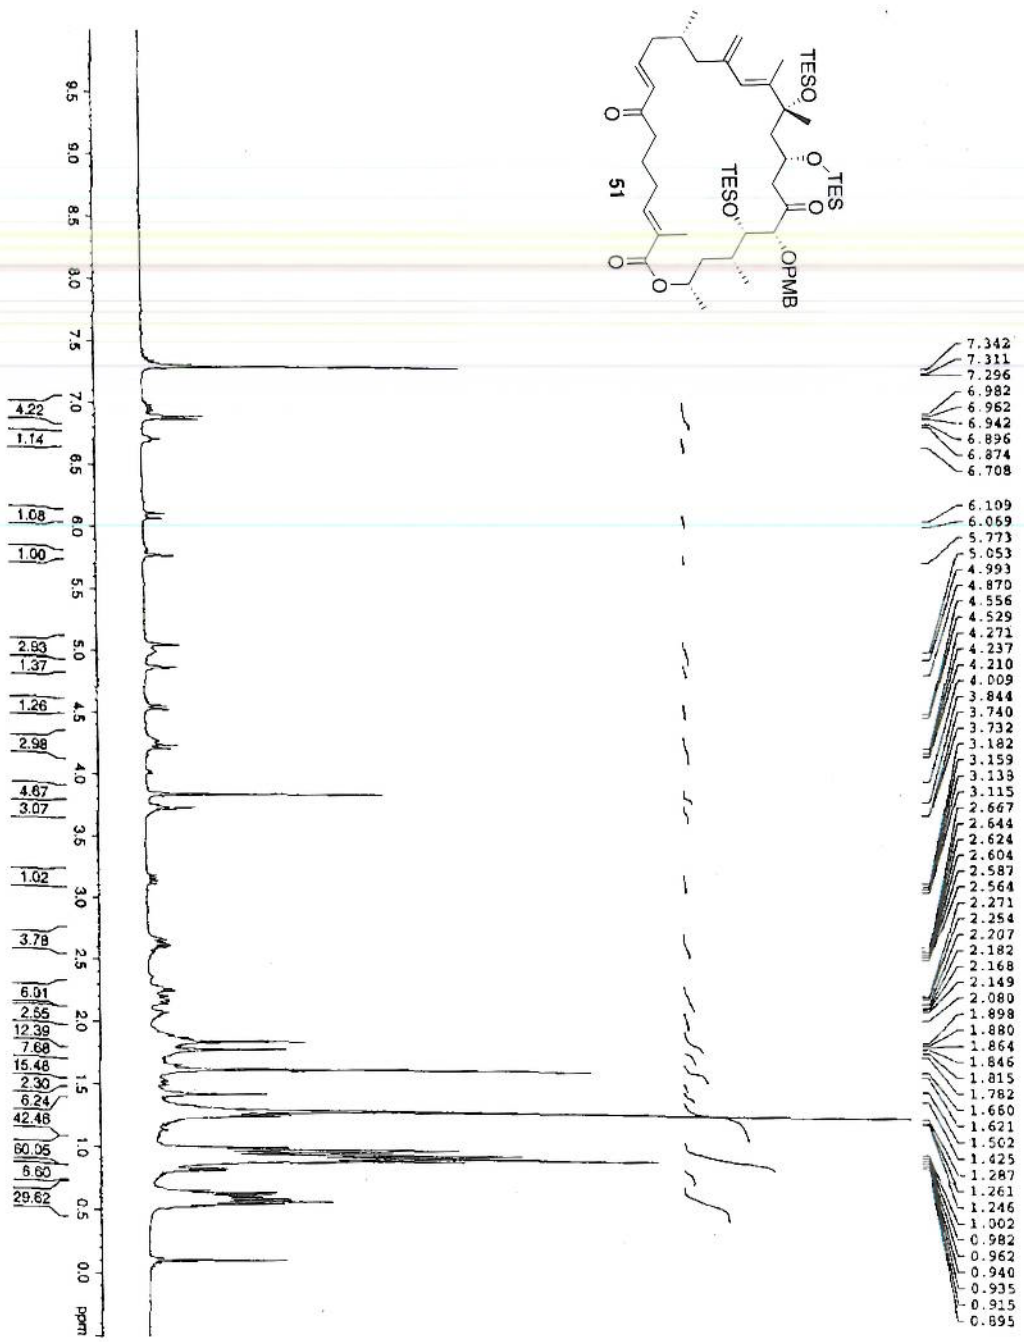

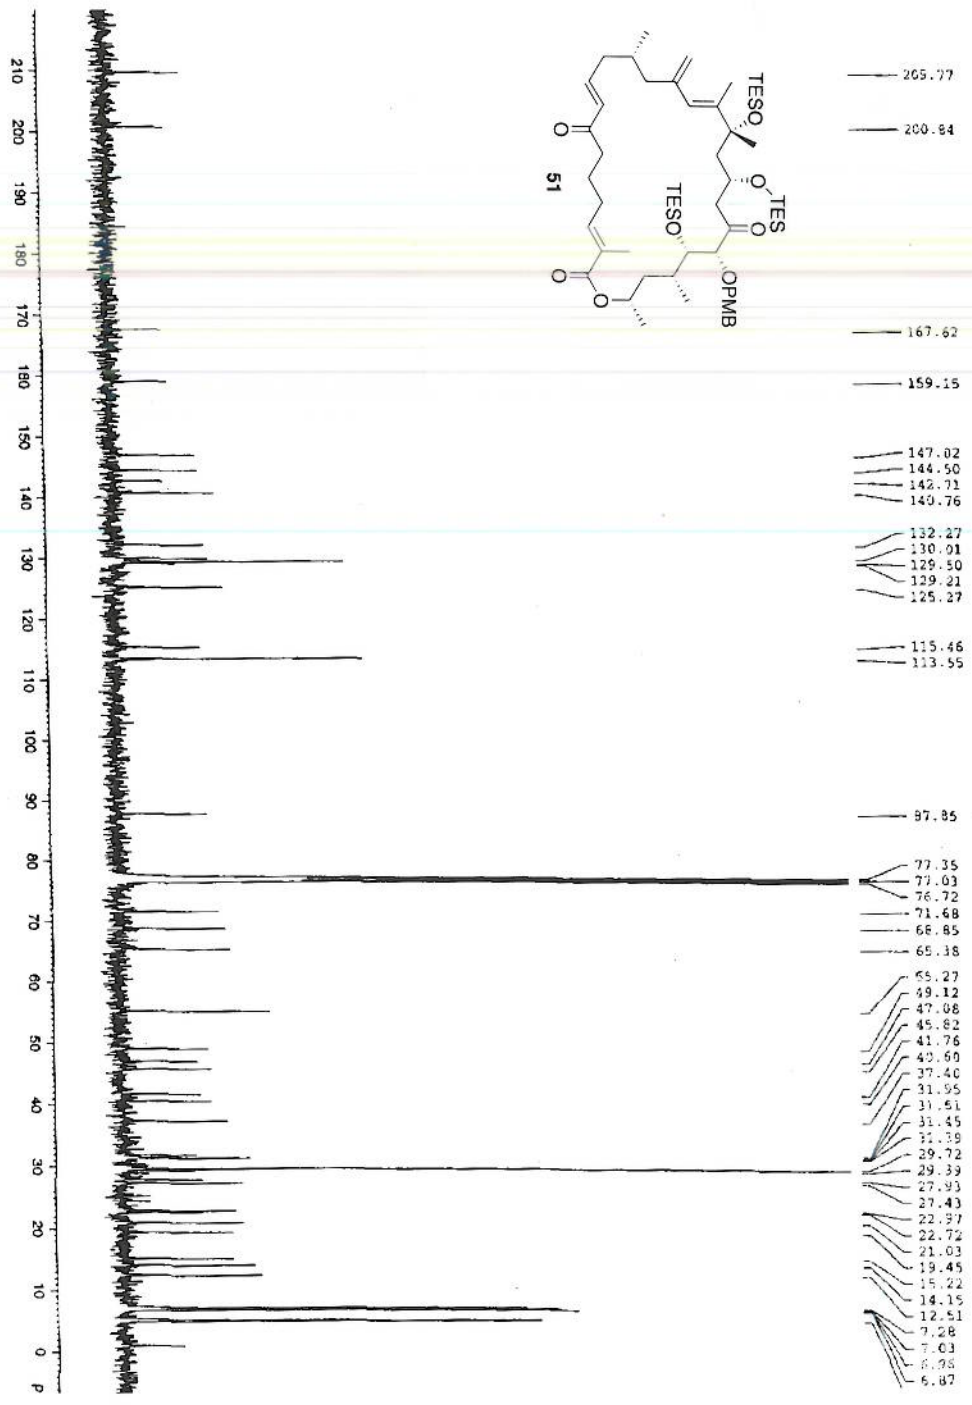

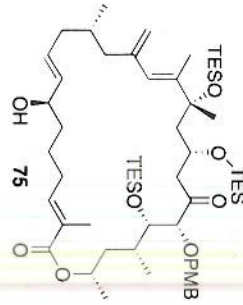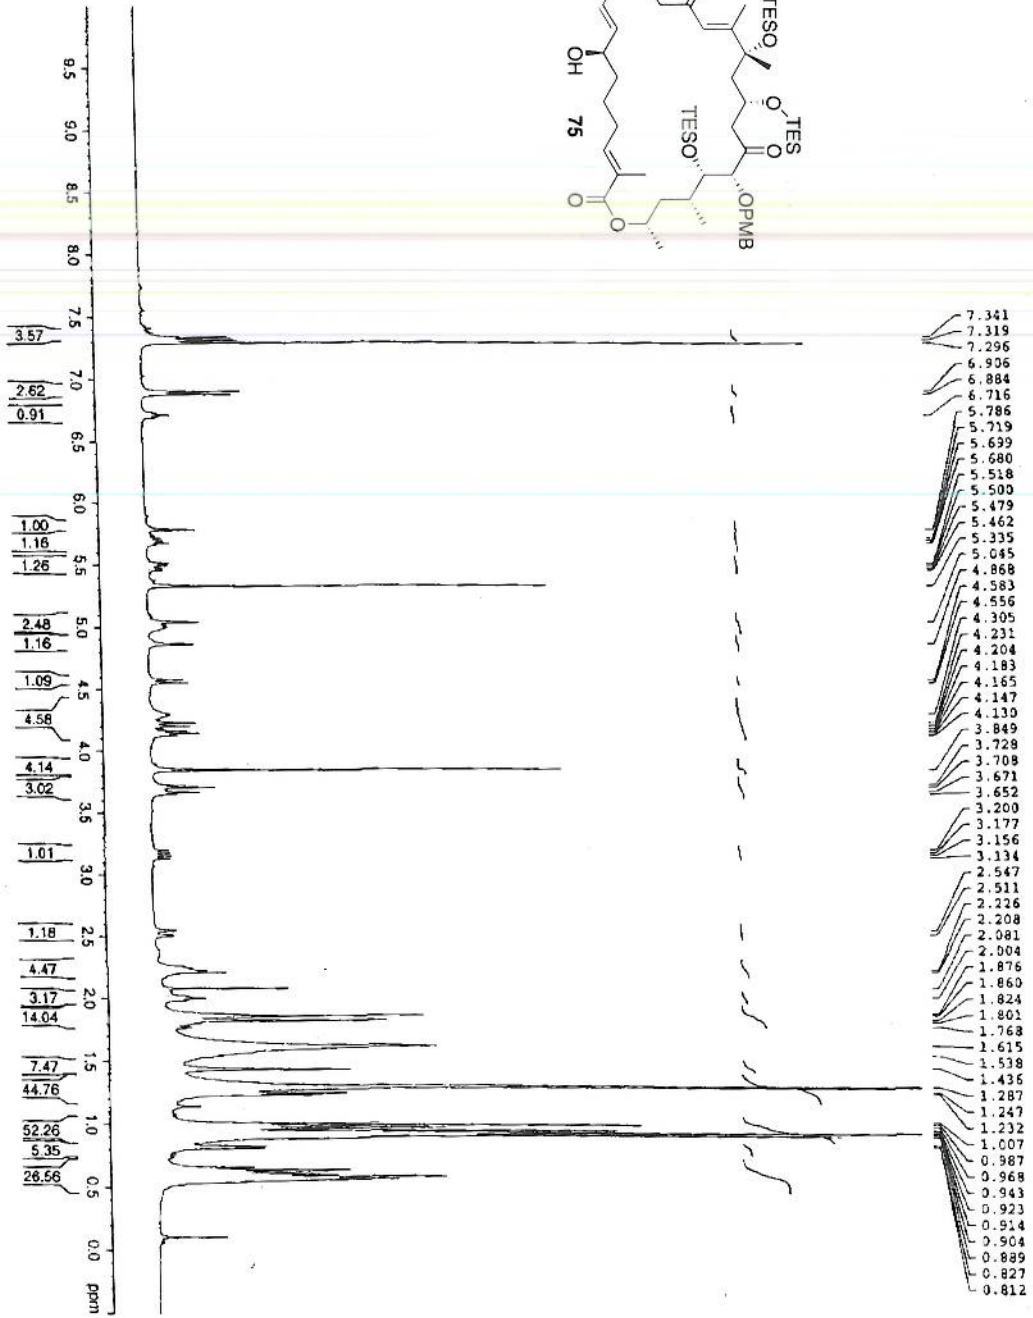

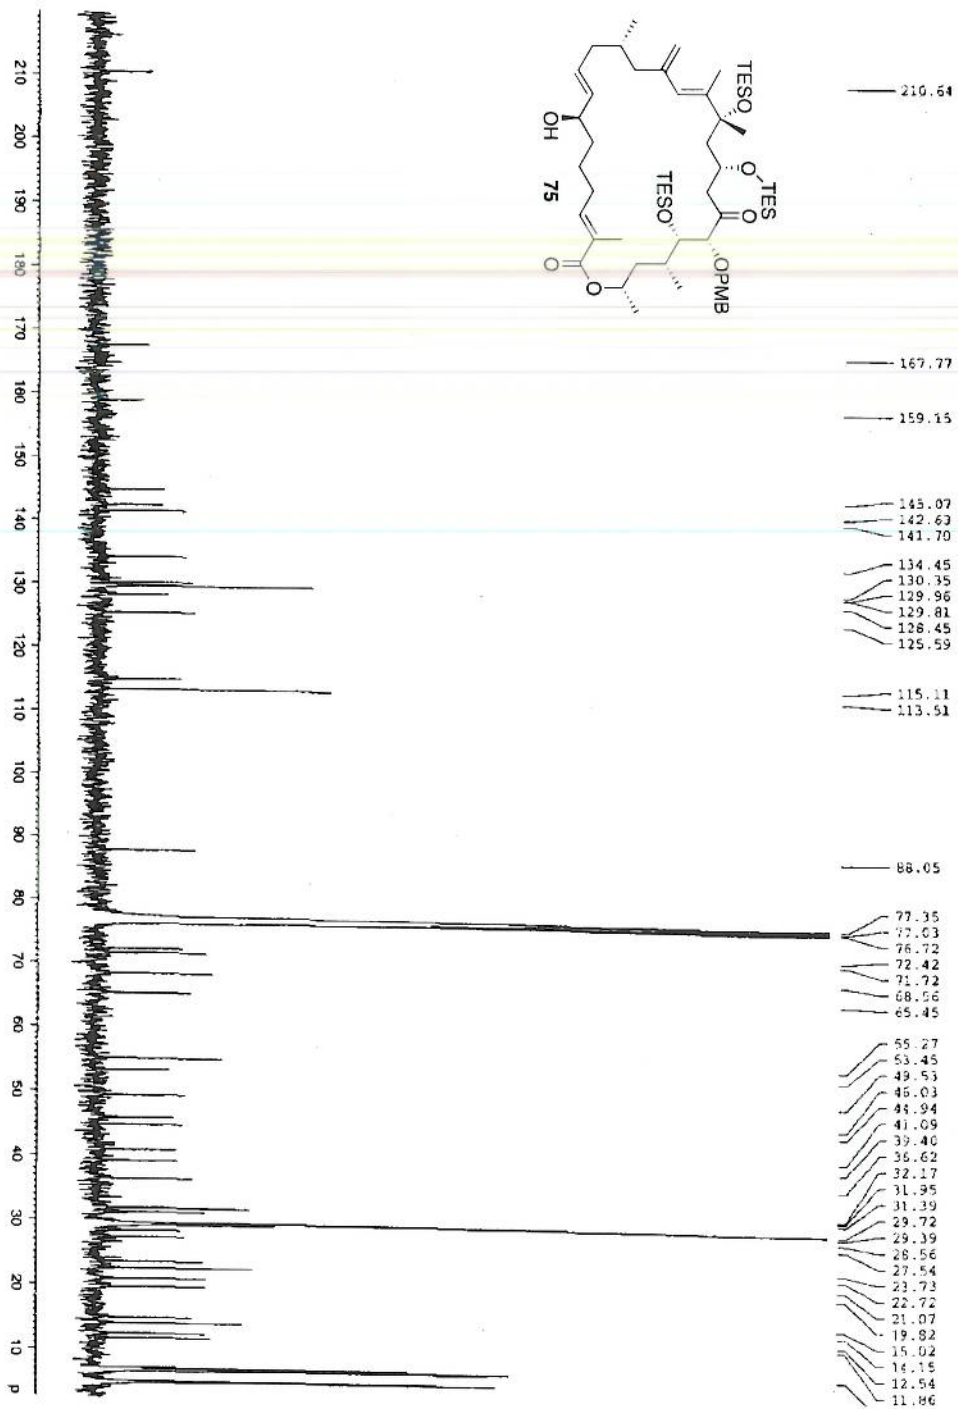

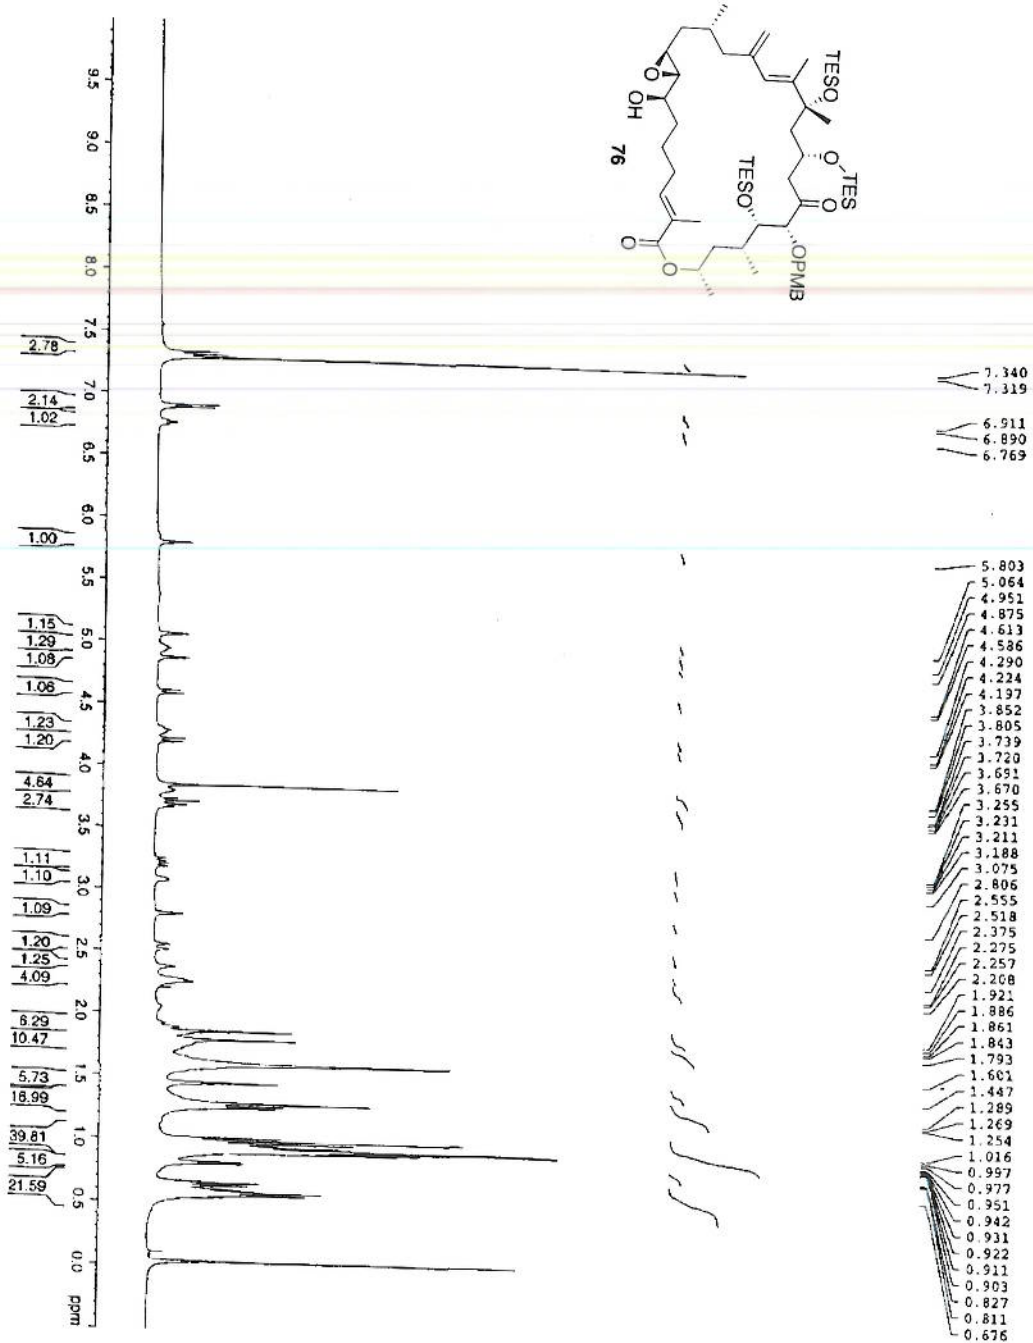

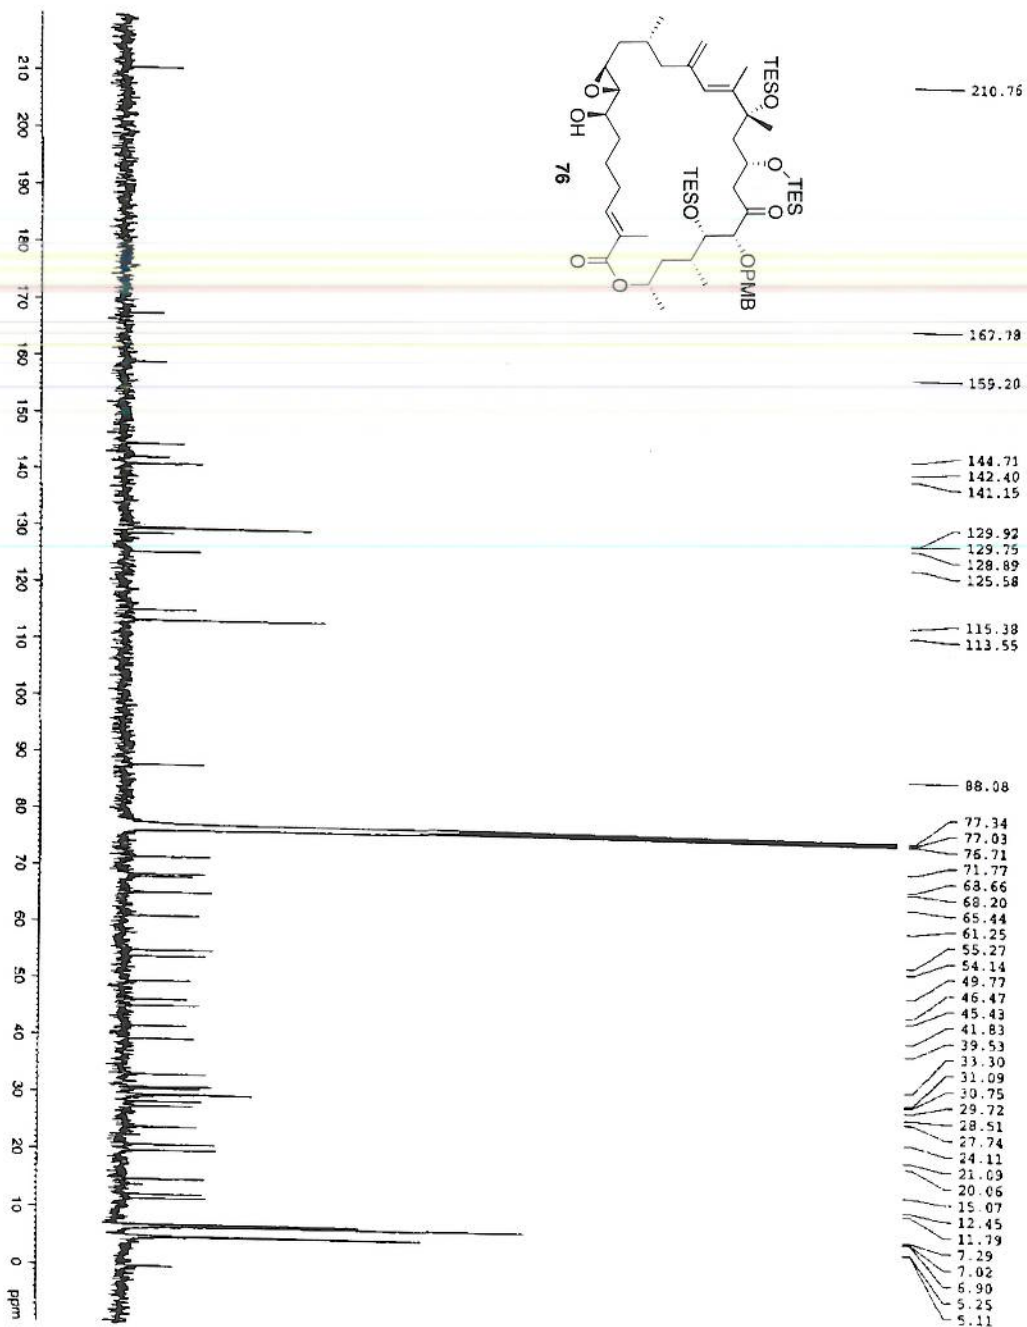



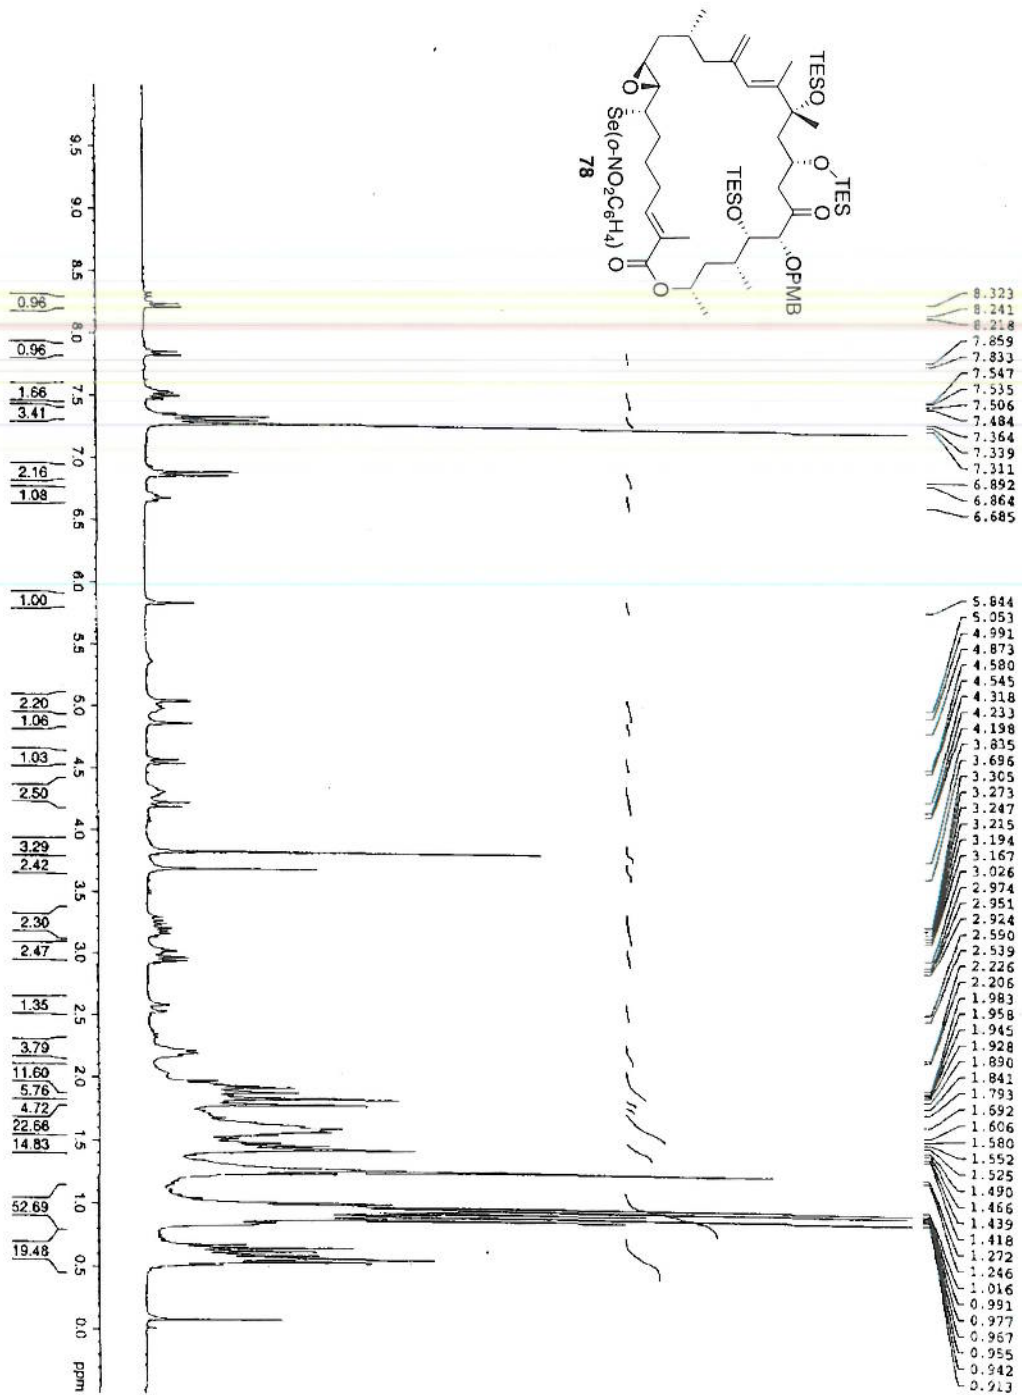

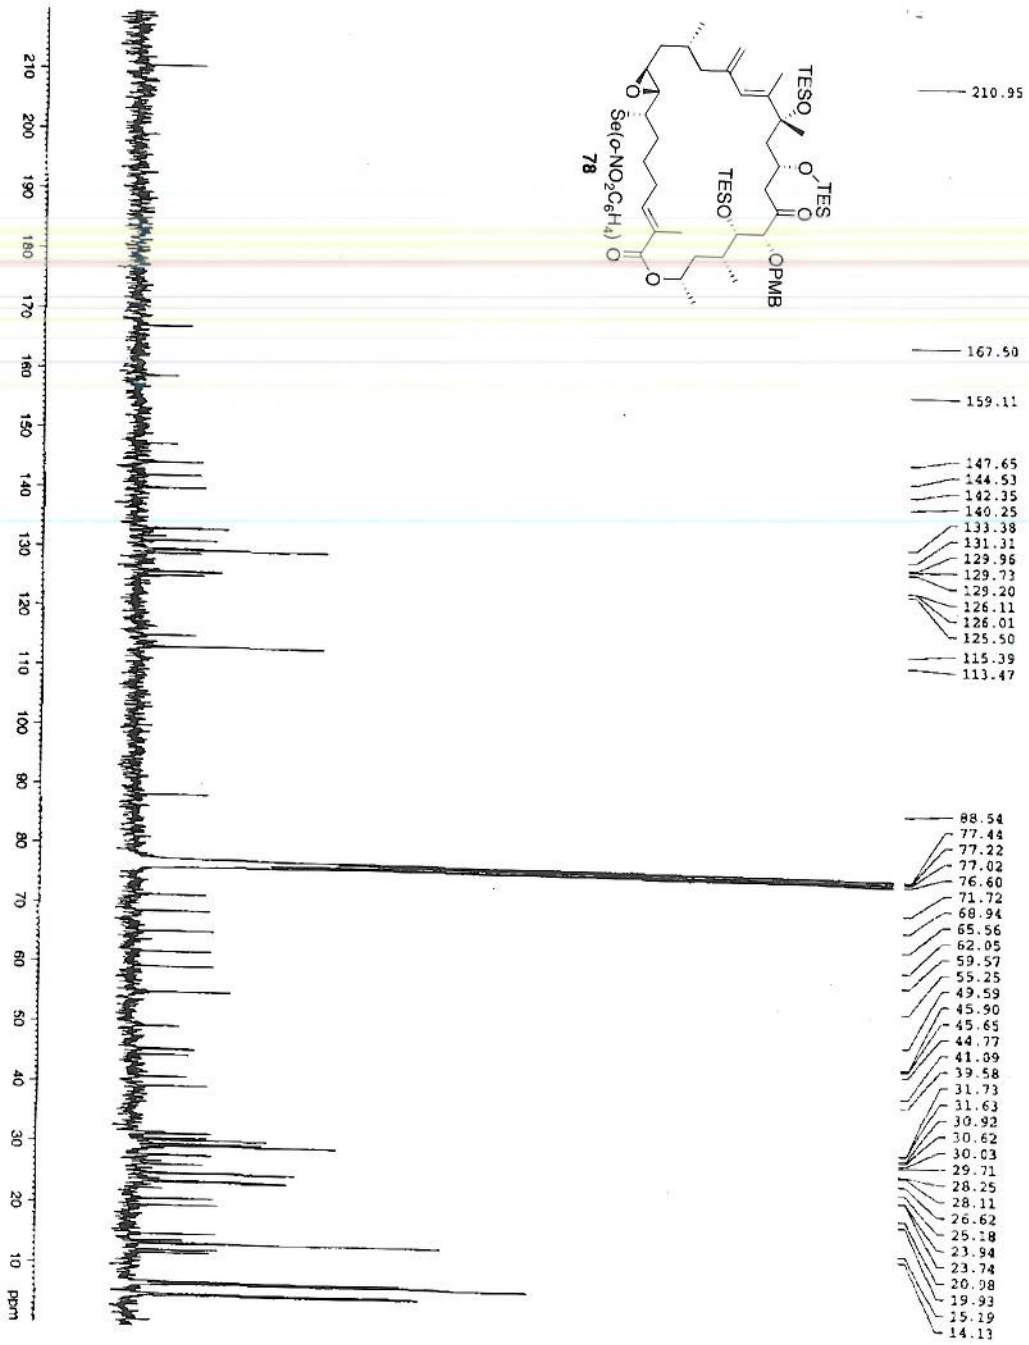

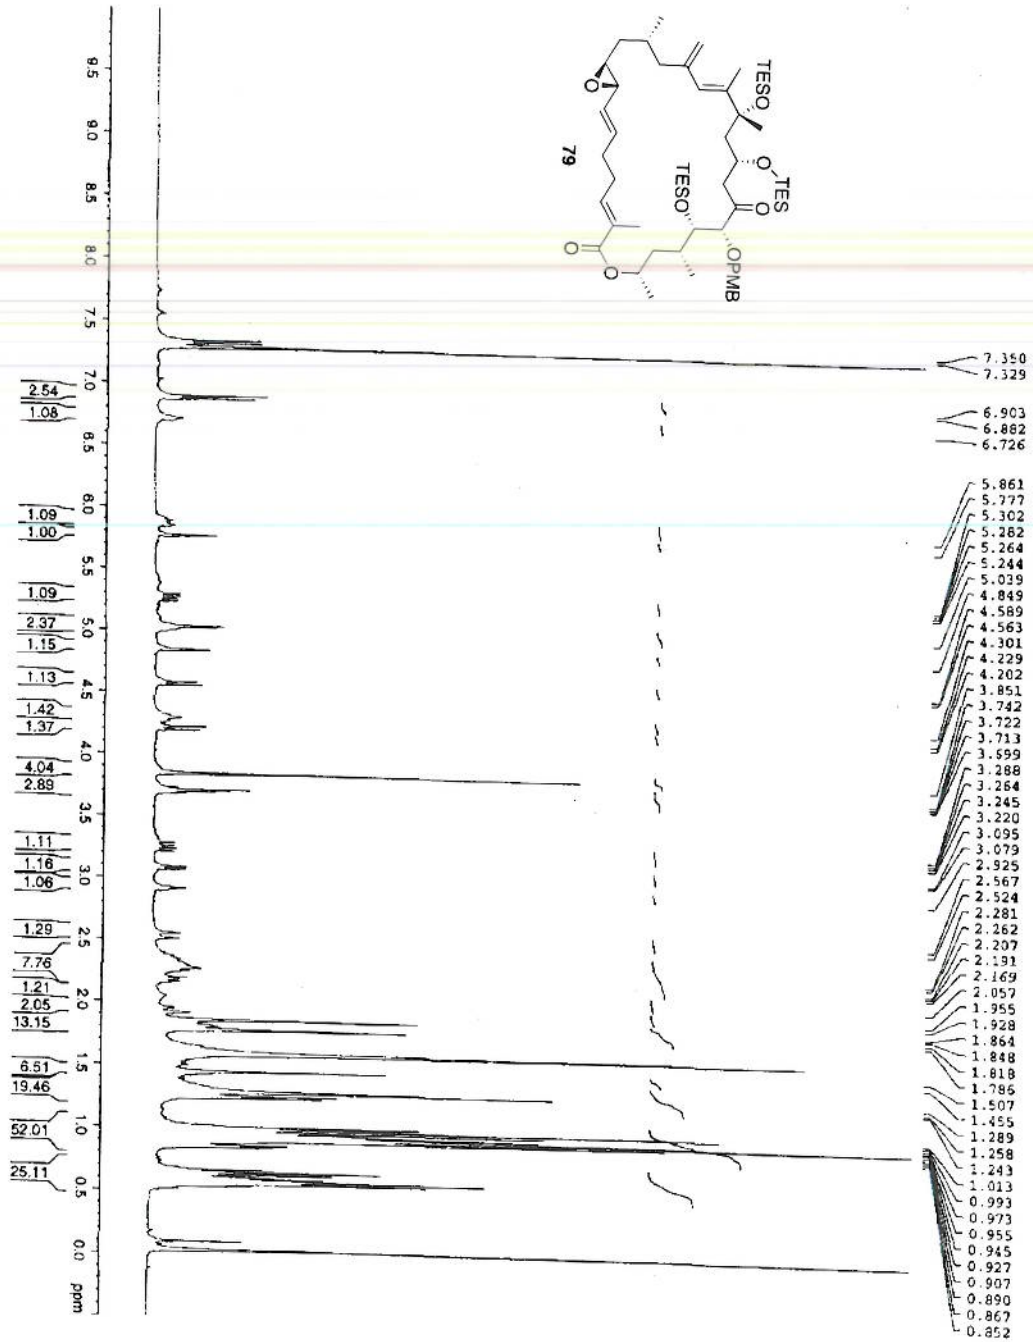

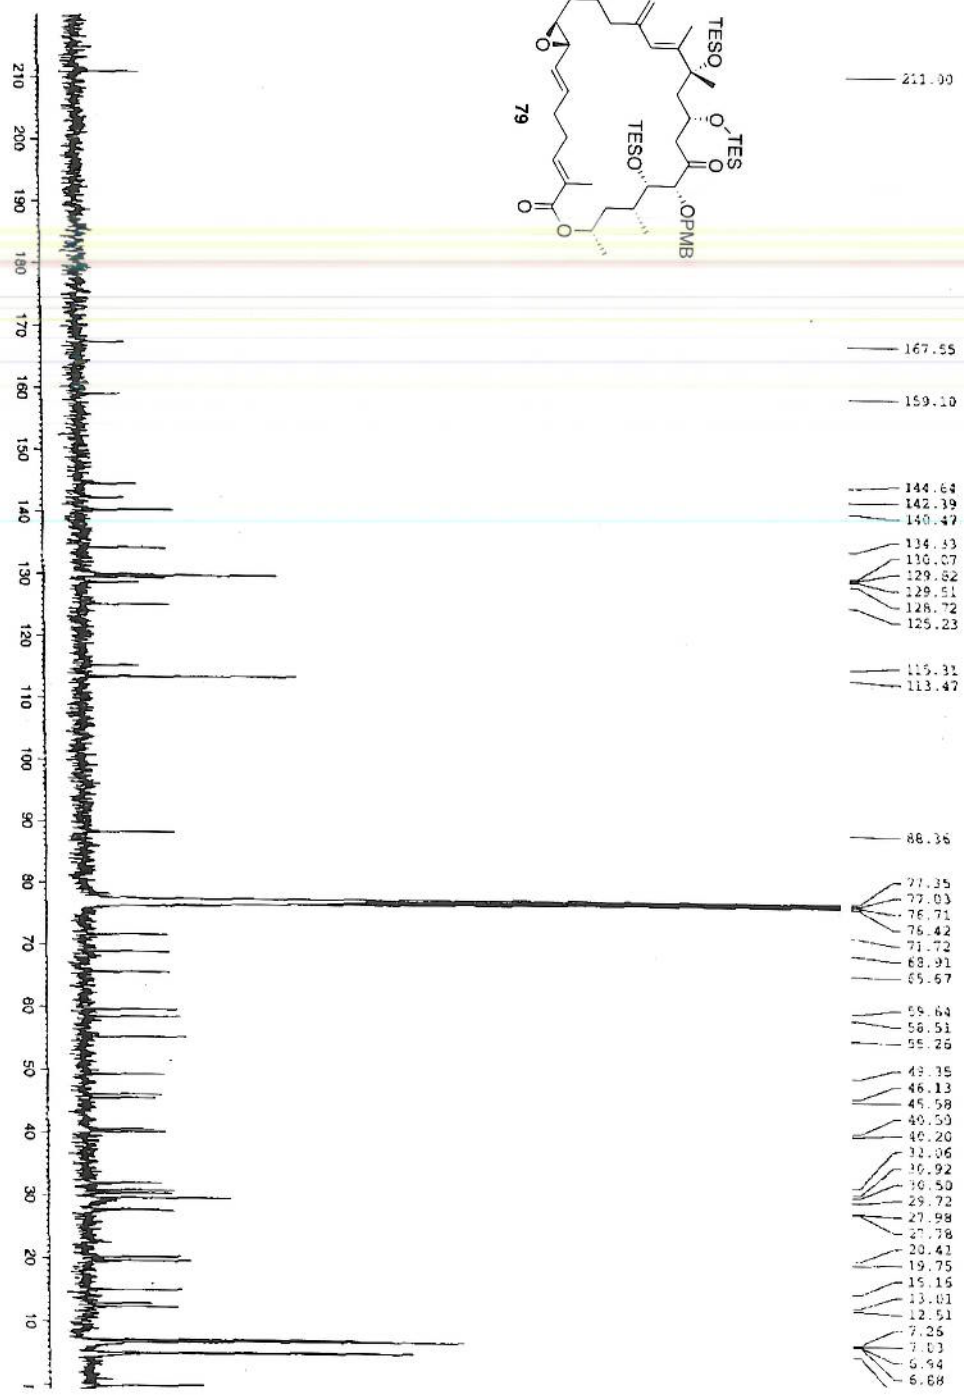

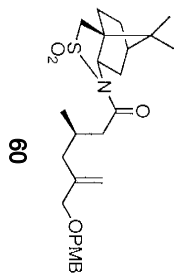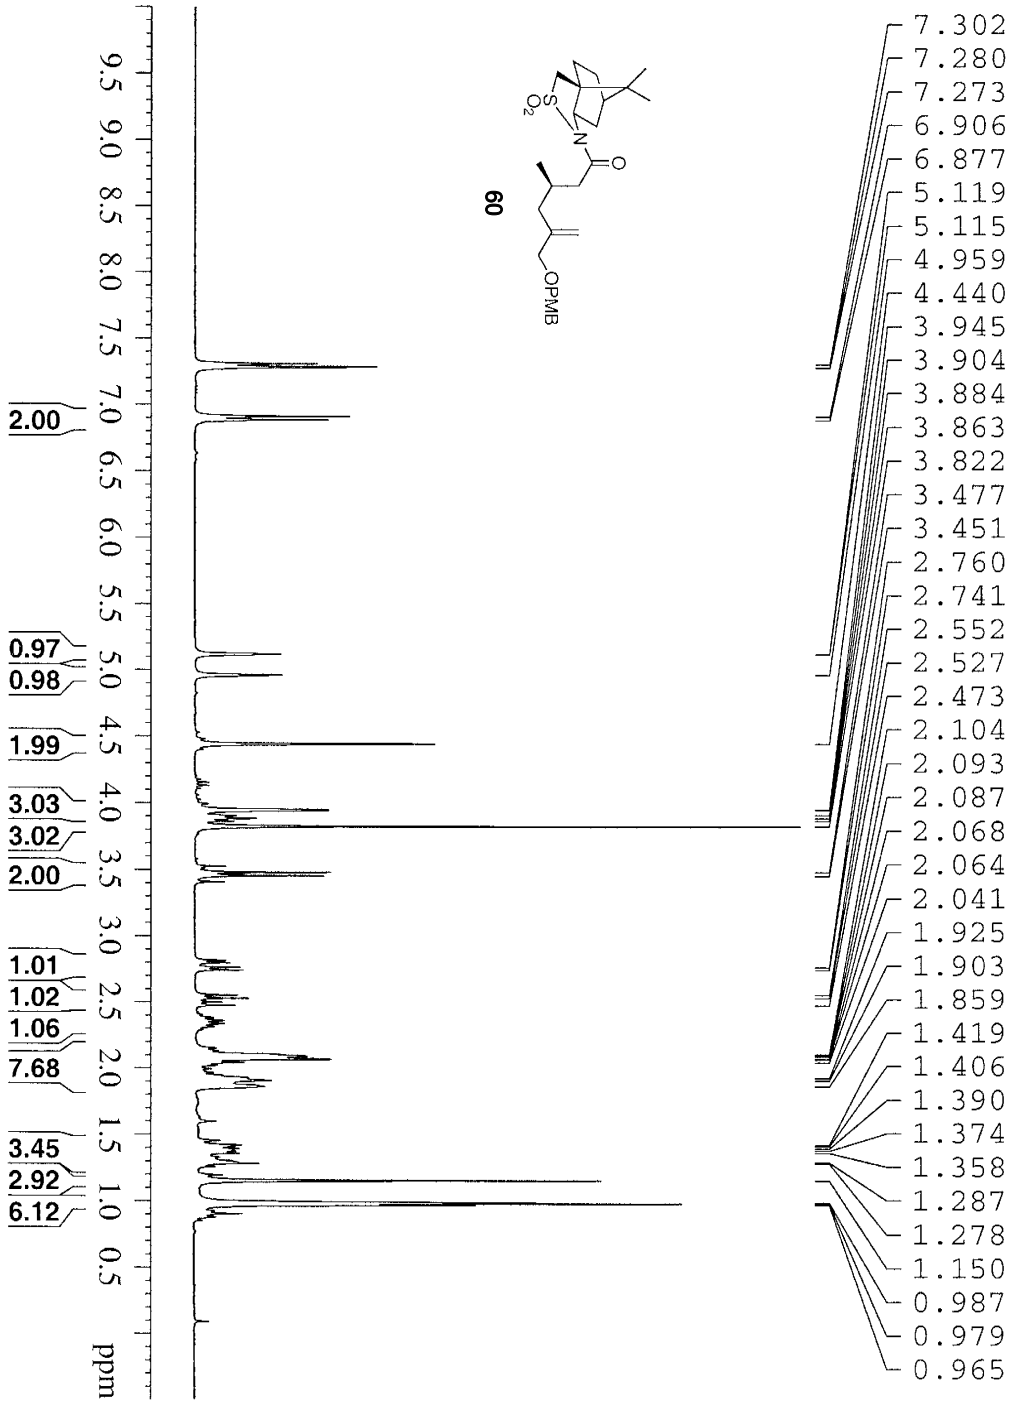

```

Current Data Parameters
Name      amp05-1V-1(01)
EXPNO    1
PROCNO   1
PROG     zgpg
USER      Liang
DU       /h
===== Acquisition Parameters =====
Date_    20060623
Time     23.13
INSTRUM  DPX300
PROBHD   5 mm QNP
PULPROG  zg30
TD        32768
SOLVENT  CDCl3
DS        2
AQ        10.00
RG        327.68
AQ        0.146157 Hz
FIDRES    3.4210291 sec
AQ        104.460 usec
DE        5.00 usec
TE        298.2 K
D1        2.0000000 sec
TD0       1
===== CHANNEL f1 =====
NUC1      1H
P1        9.00 usec
PL        0.00 dB
SFO1      300.1321009 MHz
===== Processing parameters =====
SI        300.1321009 MHz
WDW       0
SSB       0
LB        0.00 Hz
GB        0.00
PC        1.00
  
```

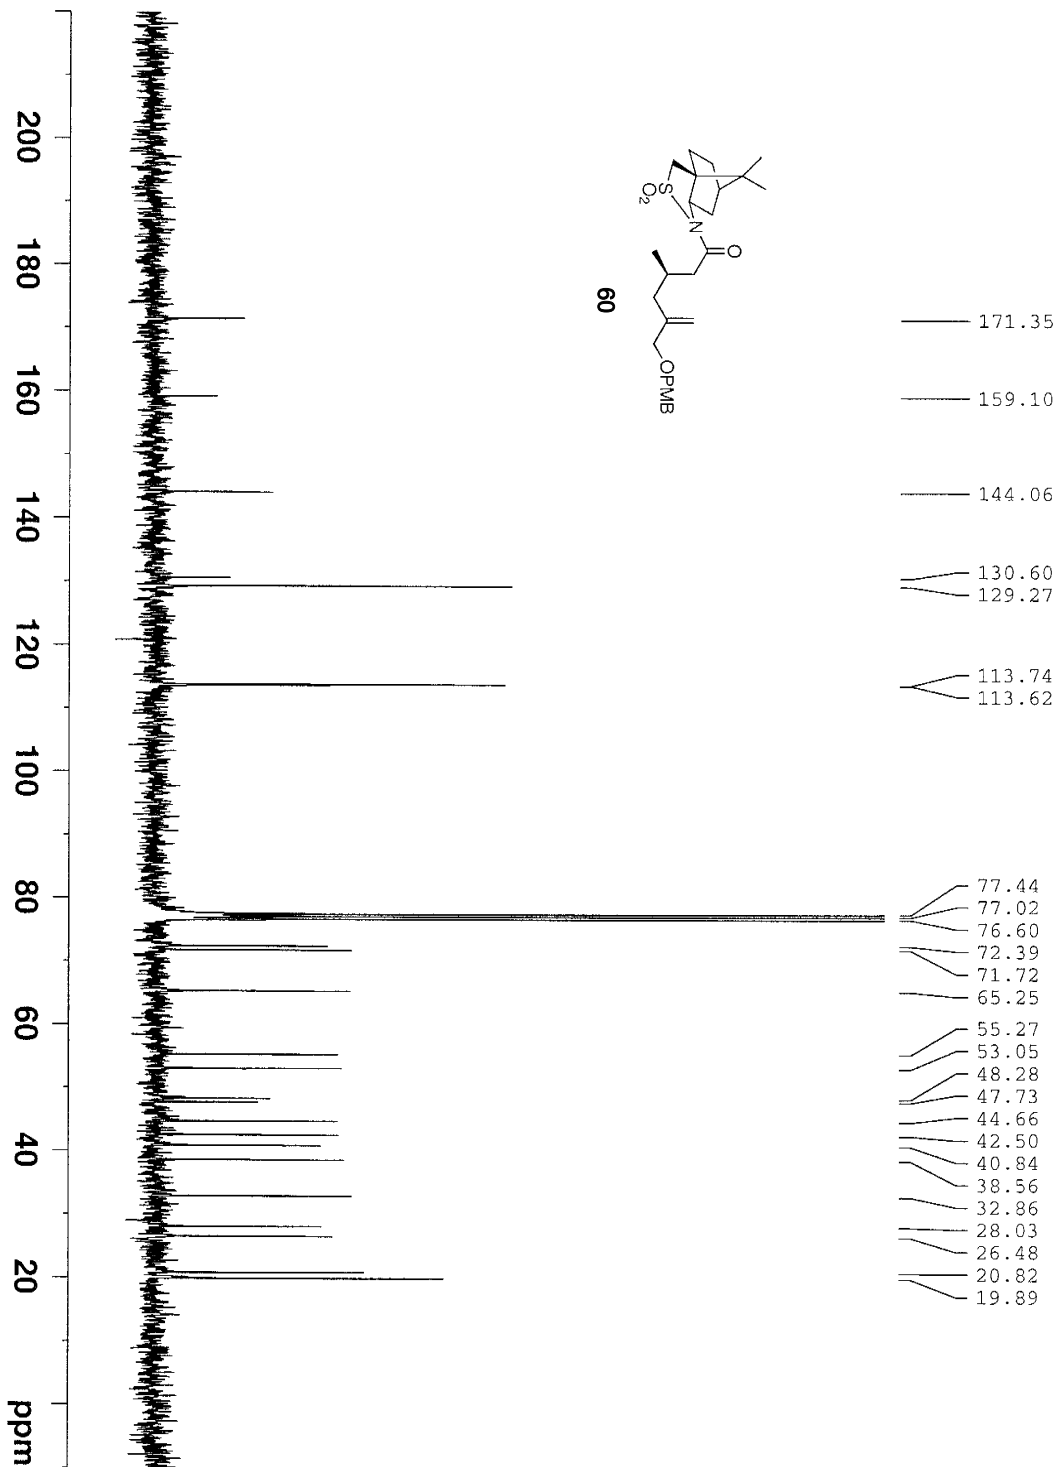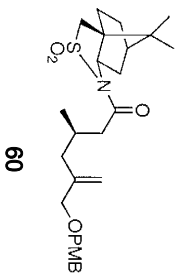

```

Current Data Parameters
NAME: ampd03-IV-1(0623)
EXPNO: 2
PROCNO: 1
DU: /h
USER: /h
F2 - Acquisition Parameters
Date_: 20060623
Time: 23.38
INSTRUM: DPX300
PROBHD: 1H/1
PULPROG: zgpg30
CD: BSS316
SOLVENT: CDCl3
NS: 694
DS: 4
SWH: 18932.194 Hz
FIDRES: 0.2827360 Hz
AQ: 1.7400308 s
RG: 9195.2
DE: 26.350 us
TE: 6.00 us
T1: 2.98.2 K
d11: 0.03000000 s
DELTA: 0.05000000 s
TDO: 1
===== CHANNEL f1 =====
NUC1: 13C
P1: 13.00 us
PL1: 0.00 dB
SFO1: 75.4760505 MHz
===== CHANNEL f2 =====
CPDPRG2: waltz16
NUC2: 1H
PCPD2: 86.00 us
PL2: -3.00 dB
PL12: 17.55 dB
PL13: 17.55 dB
SFO2: 300.1312005 MHz
F2 - Processing parameters
SI: 32768
SF: 75.4677490 MHz
WDW: EM
SSB: 0
LB: 3.00 Hz
GB: 0
PC: 1.40

```

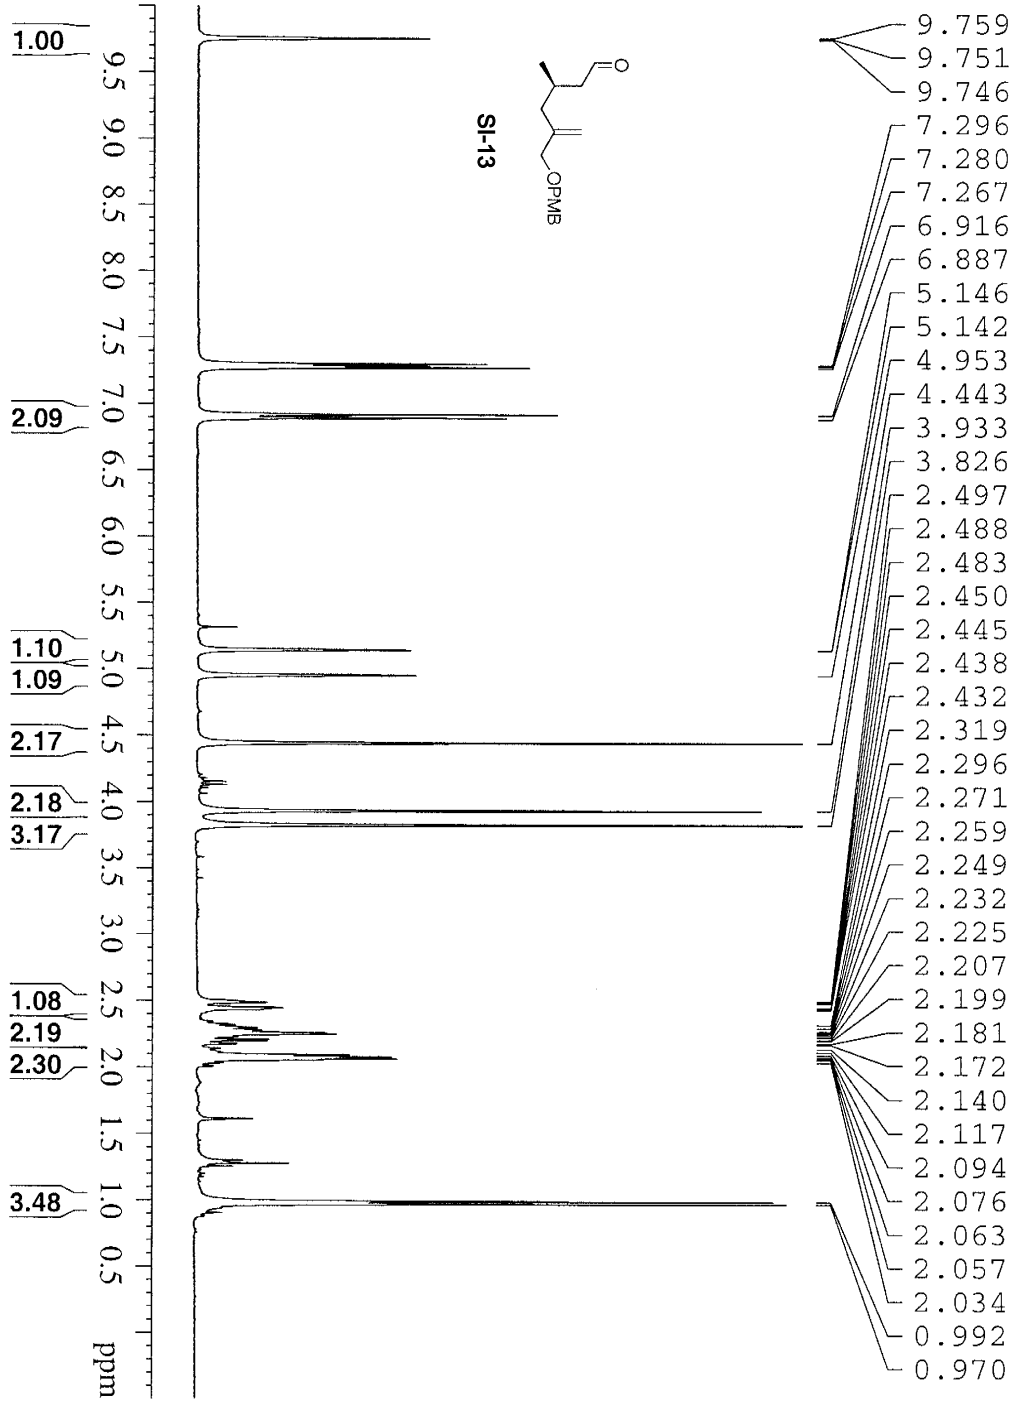

Current Data Parameters  
 NAME: SI-13 (200906)  
 EXNO: 2  
 PROCNO: 1  
 C1: /h  
 USER: liang

F2 - Acquisition Parameters  
 Date\_: 20060629  
 Time: 23:26  
 Name: SI-13  
 P1: 10  
 P2: 10  
 P3: 10  
 P4: 10  
 P5: 10  
 P6: 10  
 P7: 10  
 P8: 10  
 P9: 10  
 P10: 10  
 P11: 10  
 P12: 10  
 P13: 10  
 P14: 10  
 P15: 10  
 P16: 10  
 P17: 10  
 P18: 10  
 P19: 10  
 P20: 10  
 P21: 10  
 P22: 10  
 P23: 10  
 P24: 10  
 P25: 10  
 P26: 10  
 P27: 10  
 P28: 10  
 P29: 10  
 P30: 10  
 P31: 10  
 P32: 10  
 P33: 10  
 P34: 10  
 P35: 10  
 P36: 10  
 P37: 10  
 P38: 10  
 P39: 10  
 P40: 10  
 P41: 10  
 P42: 10  
 P43: 10  
 P44: 10  
 P45: 10  
 P46: 10  
 P47: 10  
 P48: 10  
 P49: 10  
 P50: 10  
 P51: 10  
 P52: 10  
 P53: 10  
 P54: 10  
 P55: 10  
 P56: 10  
 P57: 10  
 P58: 10  
 P59: 10  
 P60: 10  
 P61: 10  
 P62: 10  
 P63: 10  
 P64: 10  
 P65: 10  
 P66: 10  
 P67: 10  
 P68: 10  
 P69: 10  
 P70: 10  
 P71: 10  
 P72: 10  
 P73: 10  
 P74: 10  
 P75: 10  
 P76: 10  
 P77: 10  
 P78: 10  
 P79: 10  
 P80: 10  
 P81: 10  
 P82: 10  
 P83: 10  
 P84: 10  
 P85: 10  
 P86: 10  
 P87: 10  
 P88: 10  
 P89: 10  
 P90: 10  
 P91: 10  
 P92: 10  
 P93: 10  
 P94: 10  
 P95: 10  
 P96: 10  
 P97: 10  
 P98: 10  
 P99: 10  
 P100: 10

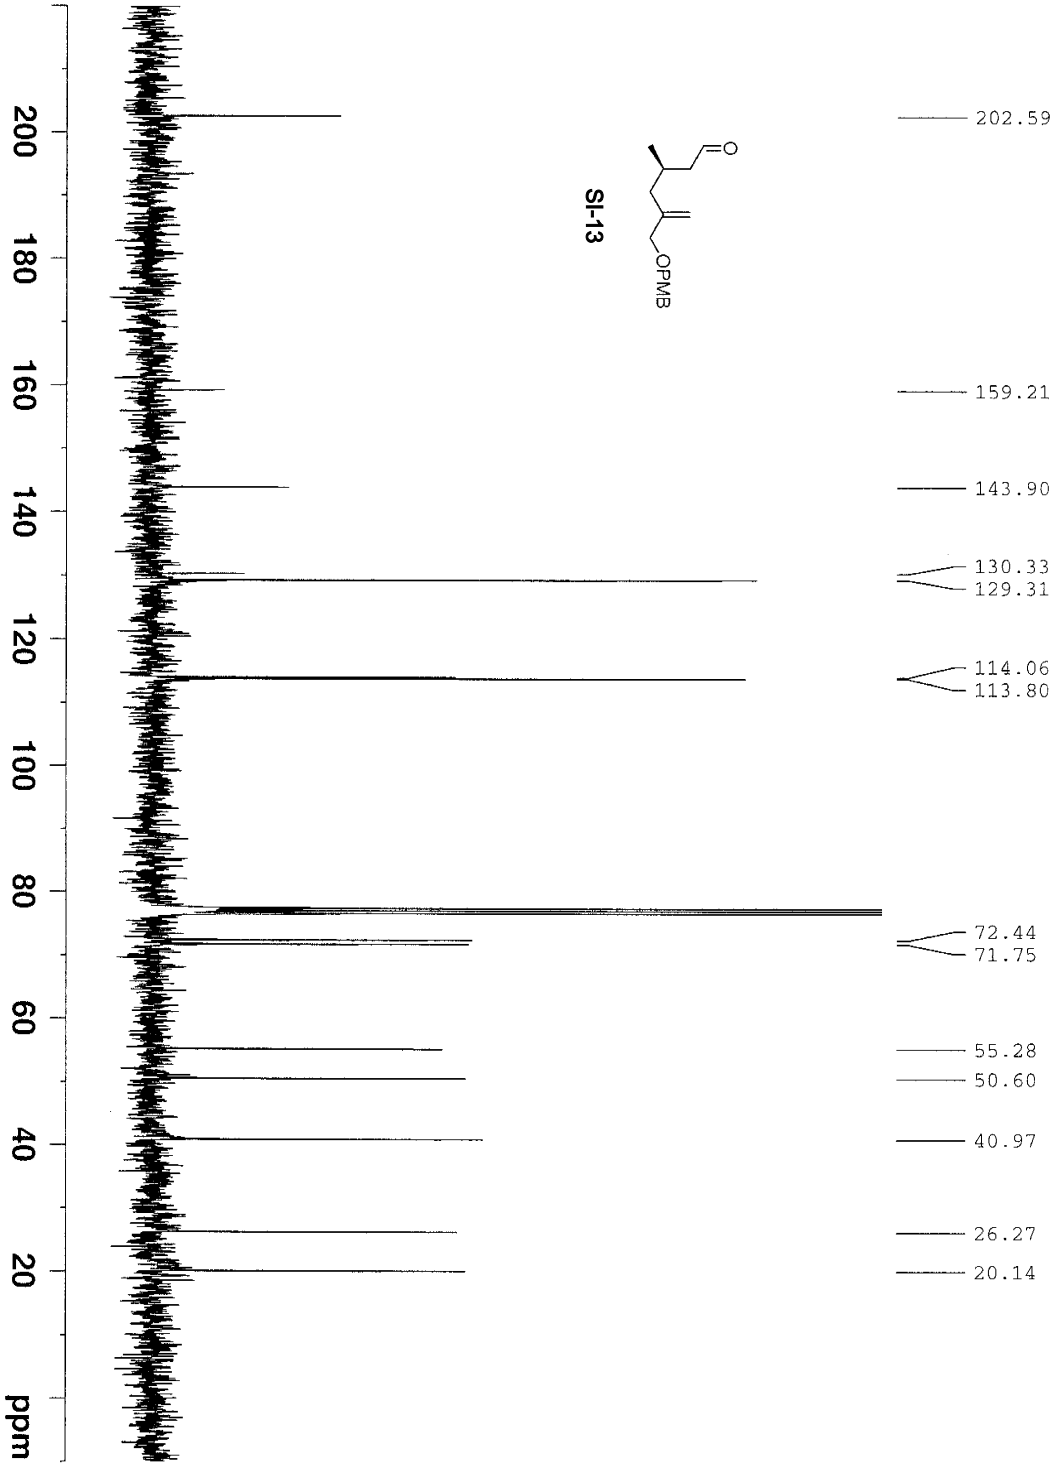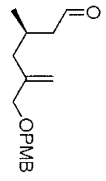

```

Current Data Parameters
NAME      ampdd1-IV-210629c
EXPNO     4
PROCNO    1
DU        /n
USBR      Liang

F2 - Acquisition Parameters
Date_     20060712
Time      9.56
INSTRUM   DPX300
PROBHD    5 mm QNP 1H/1
PULPROG   zgpg30
TD        65536
SOLVENT   CDCl3
NS        372
DS        4
SWH        18832.393 Hz
FIDRES     0.287360 Hz
AQ         1.7400308 sec
RG         9195.2
DW         28.550 usec
DE         6.00 usec
TE         298.2 K
D1         0.15000001 sec
d11        0.03000000 sec
DELTA     0.05000000 sec
TD0        1

===== CHANNEL F1 =====
NUC1       13C
P1         9.10 usec
PL1        -1.80 dB
SFO1       75.4760905 MHz

===== CHANNEL F2 =====
CDEPRG2    waltz16
NUC2       1H
PCPD2      80.00 usec
PL2        -3.00 dB
PL12       17.55 dB
PL13       17.55 dB
SFO2       300.1312005 MHz

F2 - Processing parameters
SI         32768
SF         75.4677490 MHz
WDW        EM
SSB        0
GB         3.00 Hz
CB         0
PC         1.40
  
```



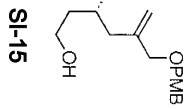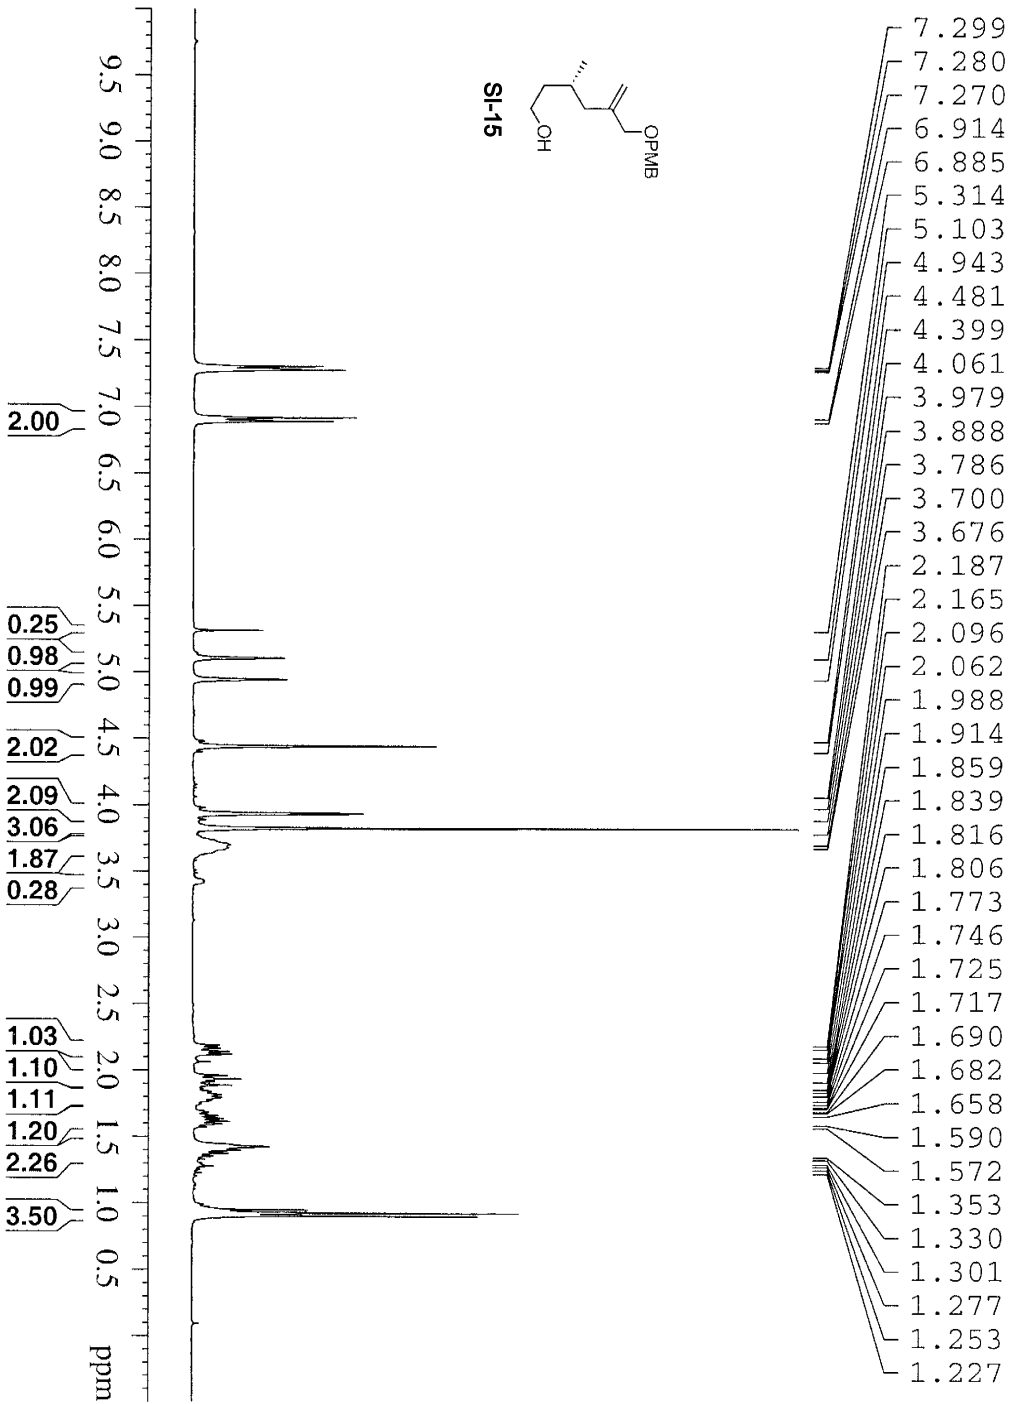

```

===== CHANNEL f1 =====
NUC1: 1H
P1: 3.00 usec
P2: 3.00 usec
SFO1: 300.1321609 MHz

F2 - Processing parameters
SI: 326.68
SF: 300.1330700 MHz
WDW: pw
SSB: 0
LB: 0.00 Hz
GB: 0
PC: 1.00

===== Acquisition Parameters =====
Date_: 20060630
Time: 14.07
INSTRUM: DPX300
PROBHD: 5 mm QNP
PULPROG: zgpg30
TD: 32768
SOLVENT: CDCl3
NS: 12
DS: 2
SWH: 4789.272 Hz
FIDRES: 0.146157 Hz
AQ: 3.4210291 sec
RG: 655.36
AQ1: 194.4600 usec
DE: 5.00 usec
TE: 298.2 K
T1: 2.00000000 sec
T10: 1
  
```

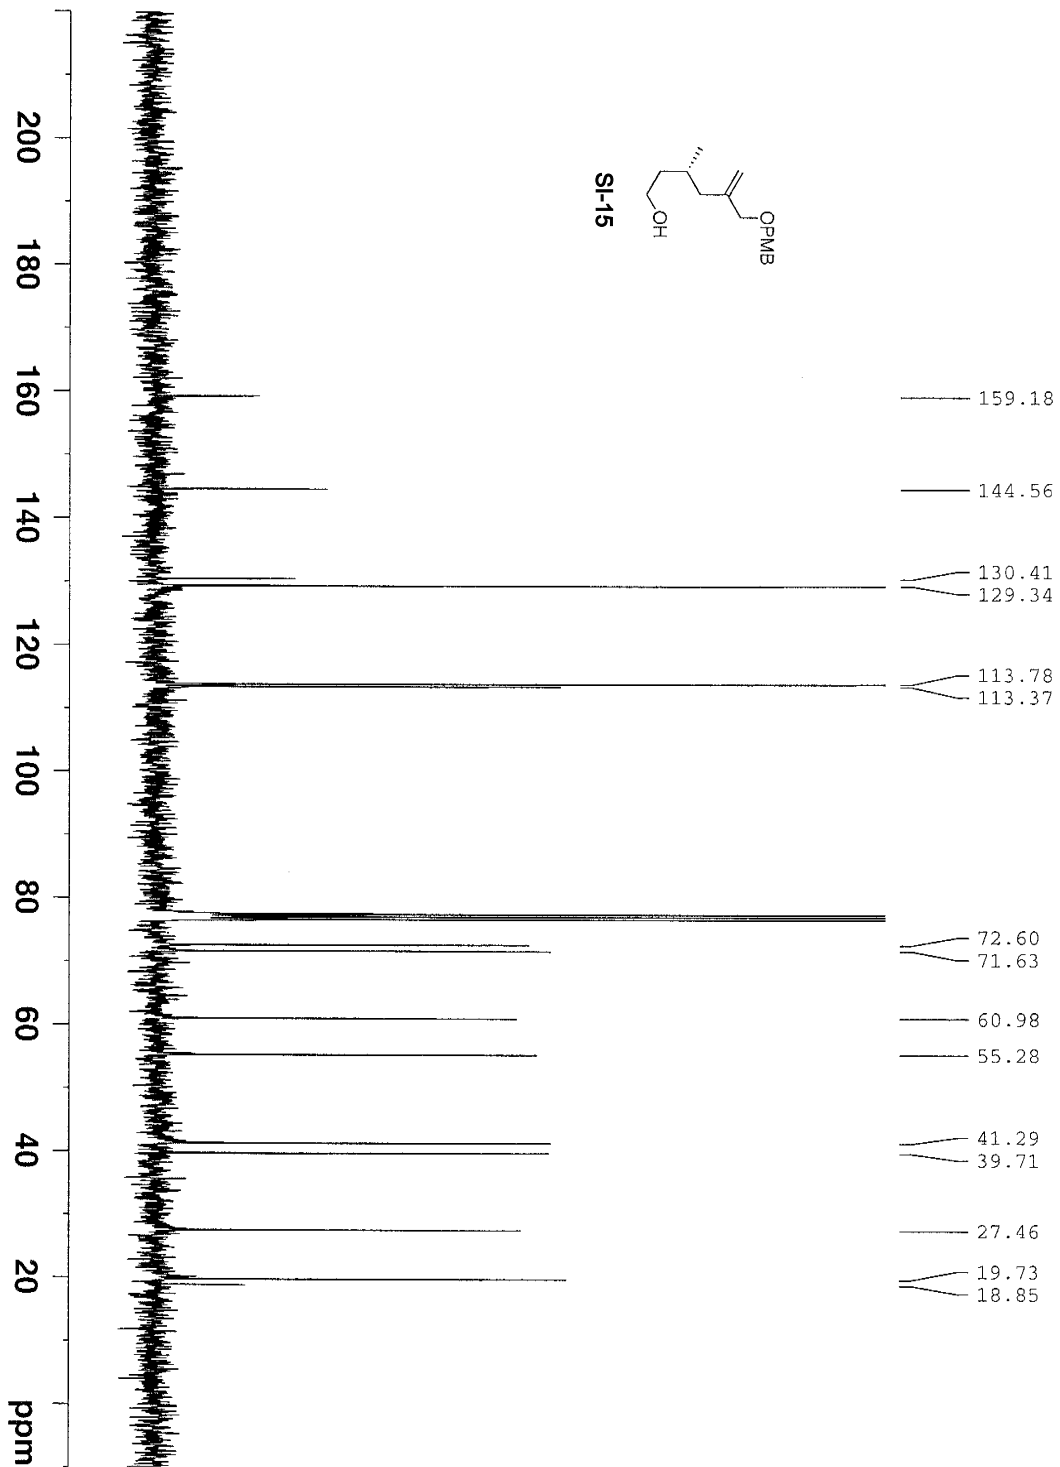

SI-15

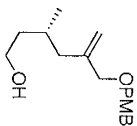

```

Current Data Parameters
NAME      ampdd1-iv-310530
EXPNO     1
PROCNO    1
F2        /h
USER      Liang

F2 - Acquisition Parameters
Date_     20060630
Time      23.00
INSTRUM   DFX100
PROBHD    zppr30
PULPROG   zgpg30
TD         65536
SOLVENT   CDCl3
NS         602
DS         4
SWH        13832.393 Hz
FIDRES     0.287360 Hz
AQ         1.7409308 sec
RG         11585.2
DE         26.550 uS
TE         6.00 uS
TE        298.2 K
D1         0.15000001 sec
d1.1       0.03000000 sec
DELTA     0.05000000 sec
TD0        1

===== CHANNEL f1 =====
NUC1       13C
P1         130
RG1        31.80 uS
RG1        3.00 uS
SFO1       75.4760935 MHz

===== CHANNEL f2 =====
CPDPRG2   waltz16
NUC2       1H
PCPD2      80.00 uS
PL2        -3.00 dB
PL12       17.55 dB
PL13       17.55 dB
SFO2       390.1312005 MHz

F2 - Processing parameters
SI         32768
SF         75.4677492 MHz
WDW        EM
SSS        0
LB         3.00 Hz
GB         0
PC         1.40
  
```

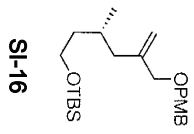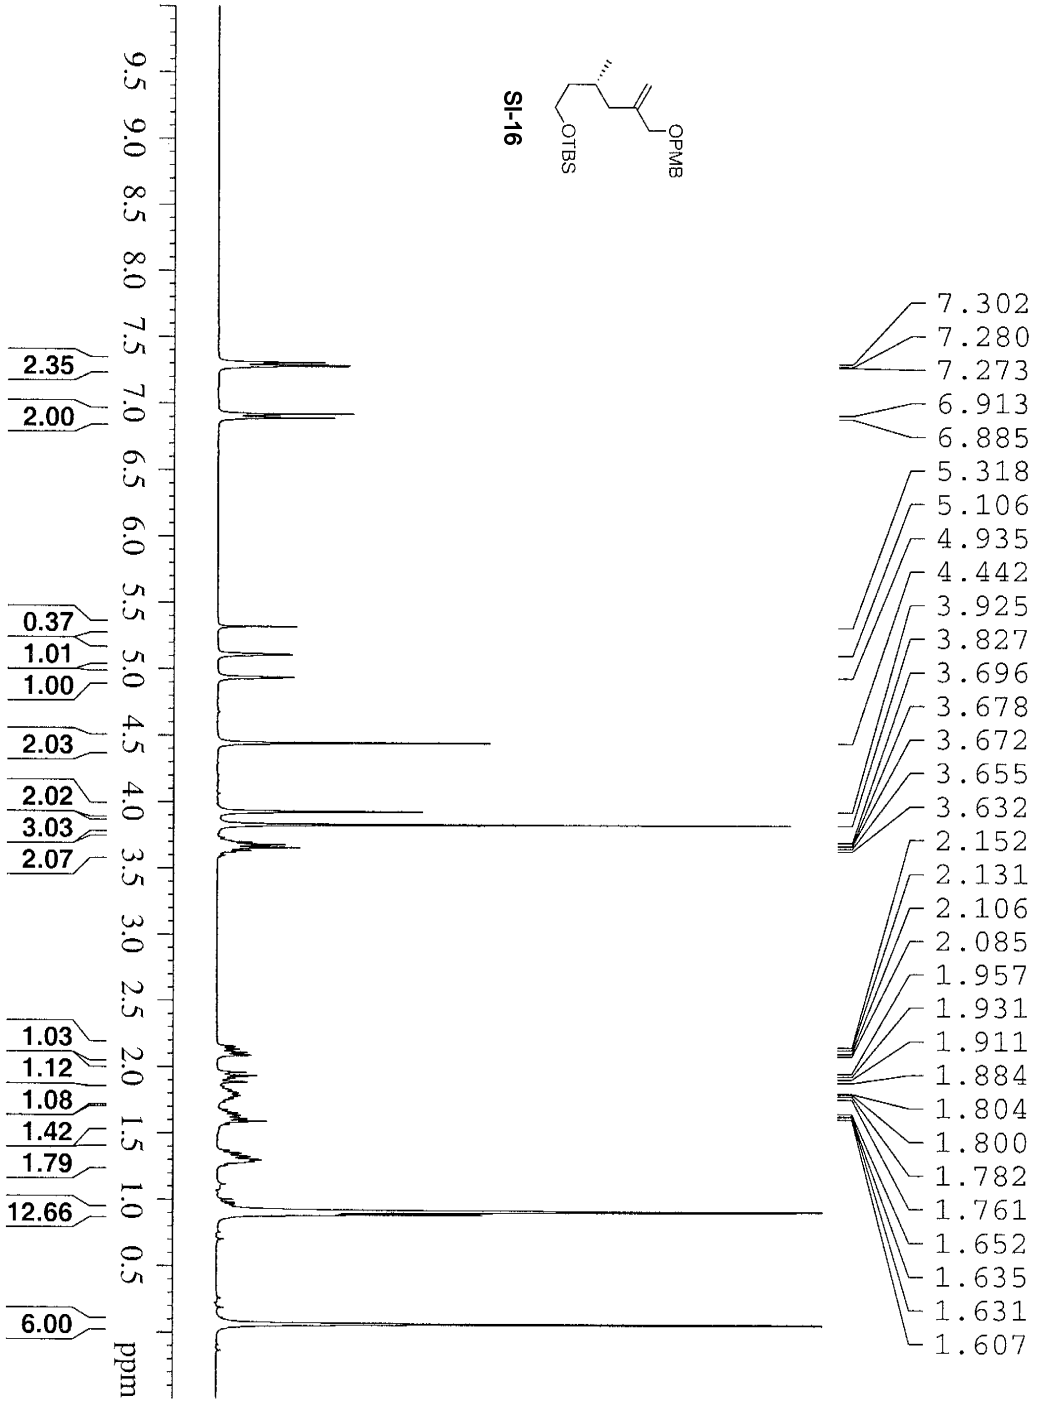

Current Data Parameters  
 NAME ampdls1-iv-4(063006)  
 EXNO 2  
 PROCMO 1  
 SI 2  
 USER Lhsjg

F2 - Acquisition Parameters  
 Date 20060630  
 Time 22:42  
 Name D242  
 PROCMO 5 mm QNP 1H/1  
 PULPROG zg30  
 TD 32768  
 NQ 1  
 SOLVENT CDCl3  
 DS 2  
 SFRS 4789.272 Hz  
 FIDRES 0.146157 Hz  
 AQ 0.020271 sec  
 RQ 0.020271 sec  
 DW 104.460 usec  
 DE 6.00 usec  
 TE 298.2 K  
 TD0 2.0000000 sec

\*\*\*\*\* CHANNEL f1 \*\*\*\*\*  
 NUCL1 1H  
 P1 9.00 usec  
 PL1 -3.00 dB  
 SFO1 300.1321009 MHz

F2 - Processing parameters  
 SI 2  
 SF 300.1300000 MHz  
 WBW no  
 SSB 0  
 GB 0  
 PC 1.00

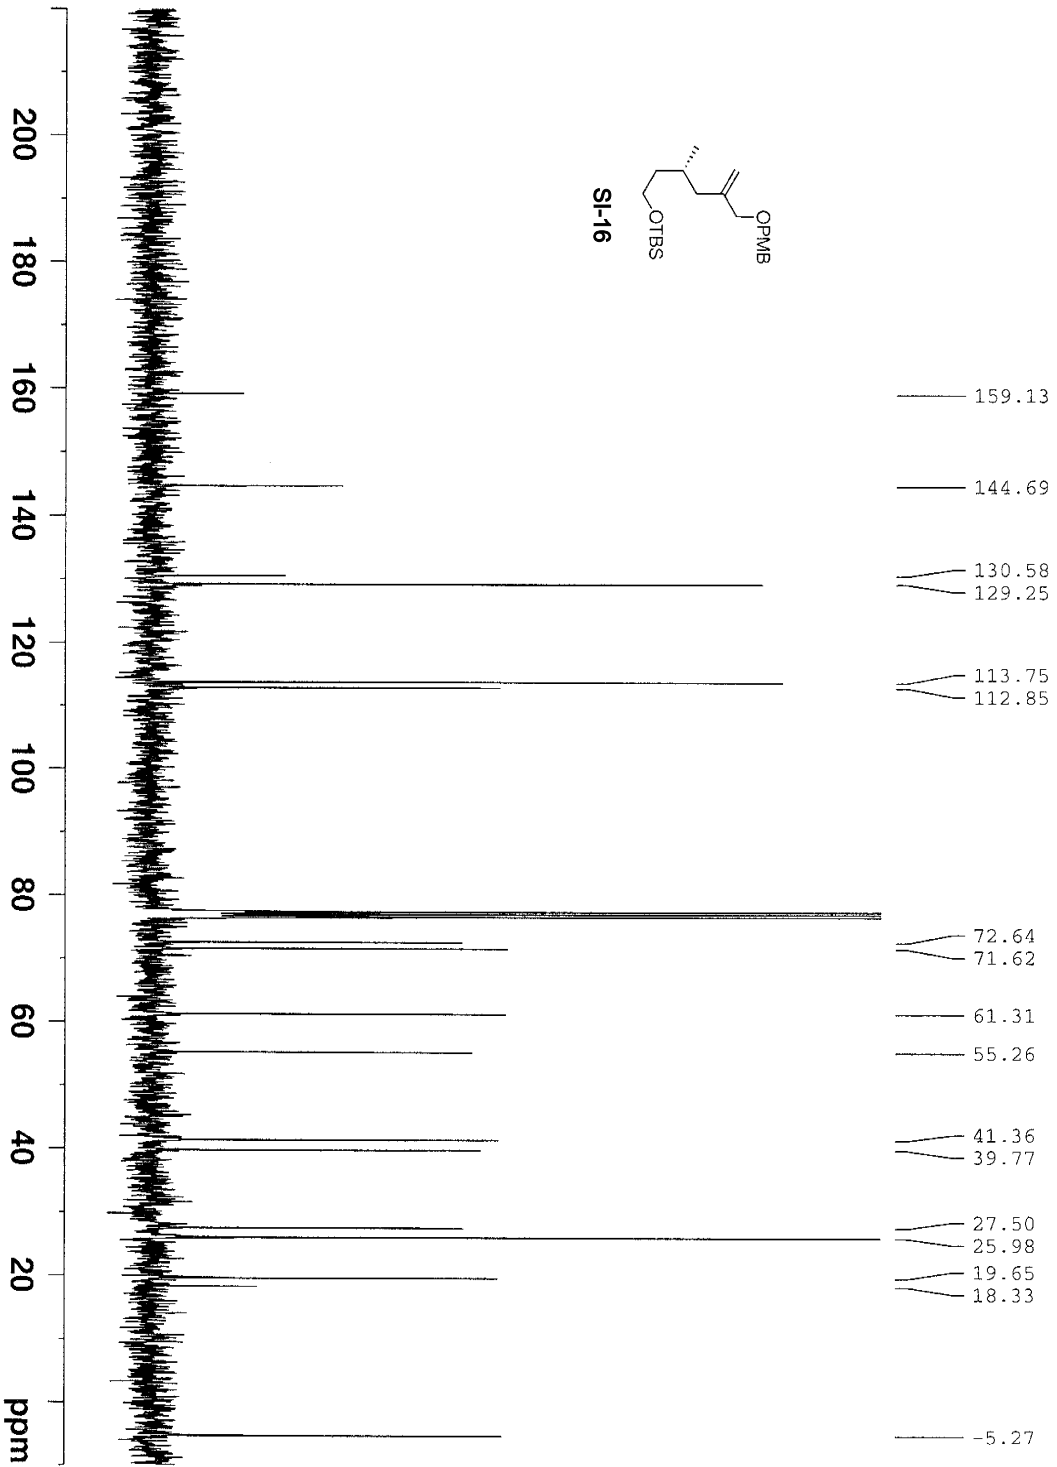

SI-16

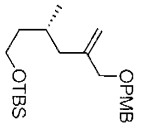

```

Current Data Parameters
NAME ampdd1-IV-410630C
EXPNO 1
PROCNO 1
DT /n
USER L:ang

F2 - Acquisition Parameters
Date_ 20060630
Time 22.31
INSTRUM 5 nm QNP
PROBHD DEX300
PULPROG zgpg30
TD 299330
SOLVENT CDCl3
NS 528
DS 4
SWH 13832.393 Hz
FIDRES 0.287360 Hz
AQ 1.7400308 sec
RG 9195.2
DE 26.556 us
TE 298.2 K
D1 0.15000001 sec
d11 0.03000000 sec
DELTA 0.05000000 sec
TD0 1

===== CHANNEL f1 =====
NUC1 13C
P1 130
PCPD2 8.80 us
P2 1.7400308 sec
SFO1 75.4760505 MHz

===== CHANNEL f2 =====
CPDPRG2 waltz16
NUC2 1H
PCPD2 80.00 us
PL2 -3.00 dB
PL12 17.55 dB
PL13 17.55 dB
SFO2 300.1312005 MHz

F2 - Processing parameters:
SI 32768
SF 75.4677490 MHz
WDW EM
SSB 0
LB 3.00 Hz
GB 0
PC 1.40
  
```

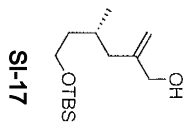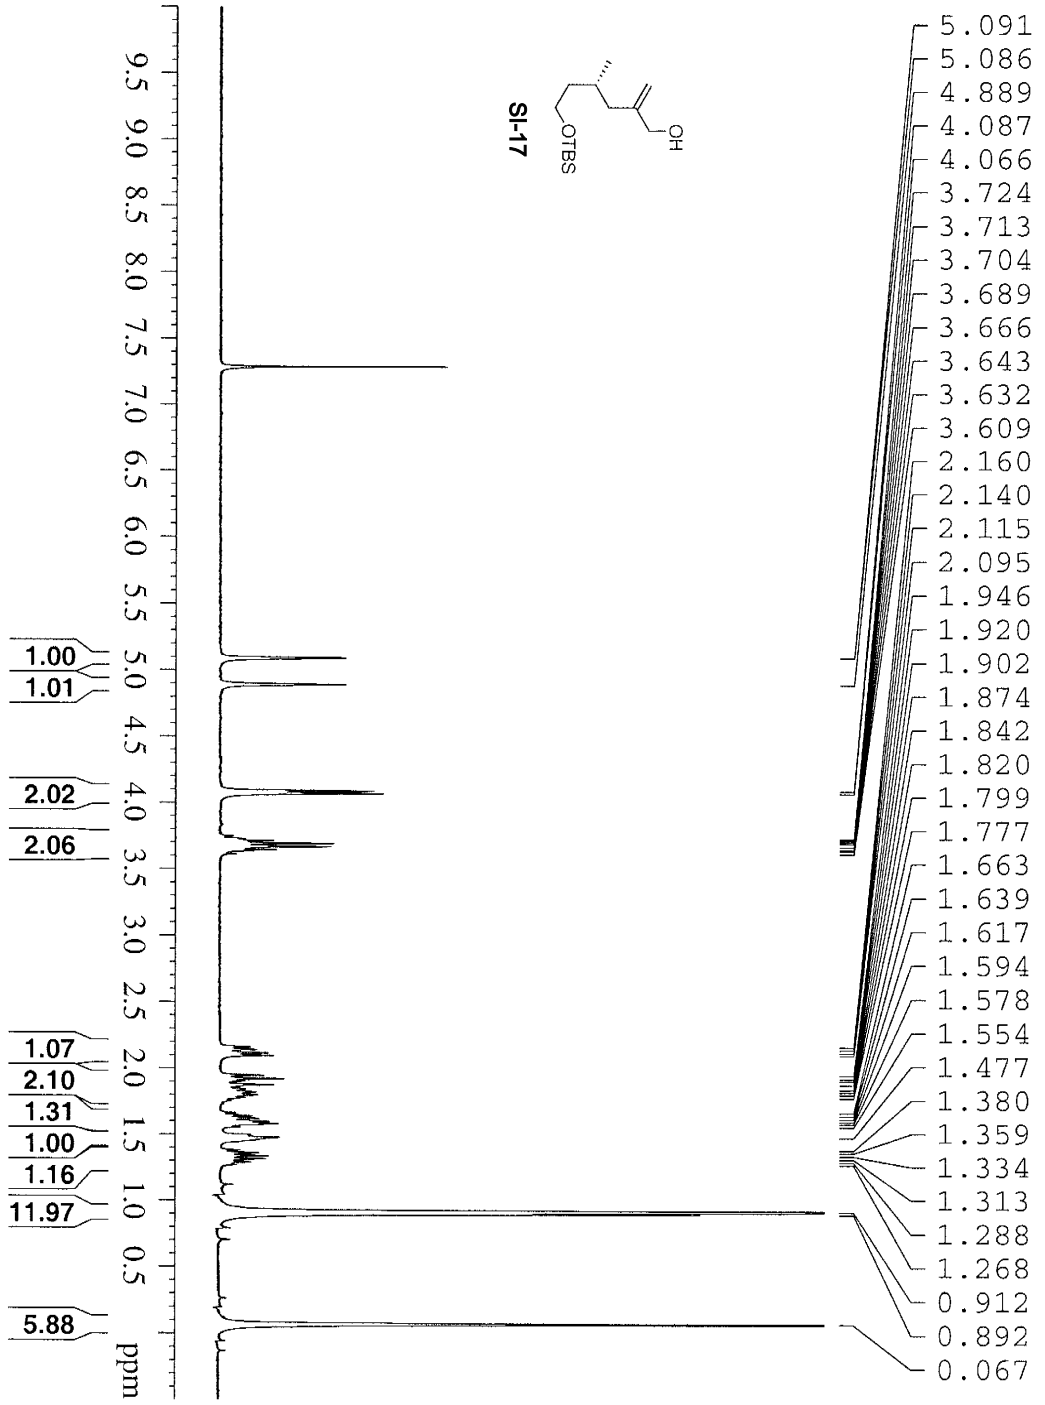

```

Current Data Parameters
Name: SI-17
EXPNO: 1
PROCNO: 1
F2 - Acquisition Parameters
Date_ : 20060801
Time: 14.20
INSTRUM: DSI
PROBHD: 5 mm QNP
PULPROG: zg30
TD: 32768
SOLVENT: CDCl3
NS: 2
DS: 2
SWH: 4789.272 Hz
F1FRES: 0.146157 Hz
AQ: 3.4210291 sec
RG: 104.400 usec
DE: 6.00 usec
TE: 298.2 K
D1: 2.00000000 sec
TDO: 1
===== CHANNEL f1 =====
NUC1: 1H
P1: 9.00 usec
PL1: -3.00 dB
SFO1: 300.1321009 MHz
F2 - Processing parameters
SI: 32768
SF: 300.1321009 MHz
WDW: no
SSB: 0
LB: 0.00 Hz
GB: 0
PC: 1.00
  
```

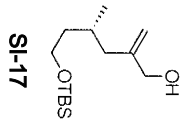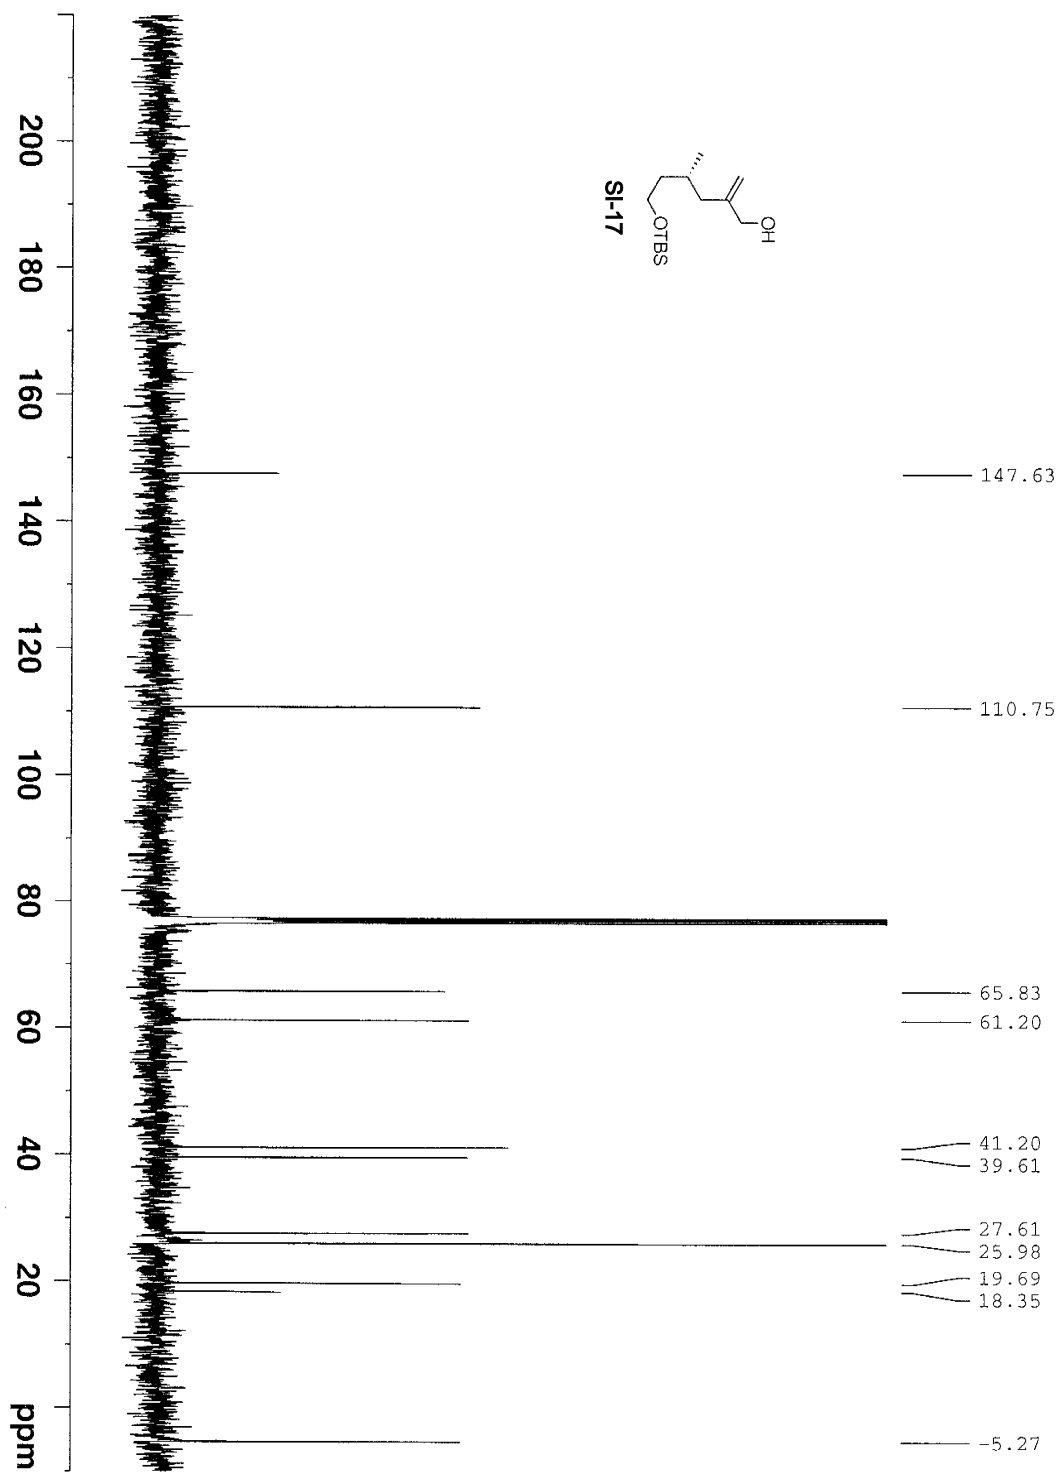

```

Current Data Parameters
NAME      ampdd1-1v-10301k
EXPNO    3
PROCNO   1
F2 - Acquisition Parameters
Date_    20060801
Time     15.39
INSTRUM  DFX400
PROBHD   5 mm BBO BB-1H
PULPROG  zgpg30
TD        65536
SOLVENT  CDCl3
NS        1743
DS        4
SWH       25325.629 Hz
F2 - Processing parameters
SI        32768
SF        100.5825950 MHz
WDW       EM
SSB       0
LB        3.00 Hz
GB        0
PC        1.40

===== CHANNEL f1 =====
NUC1      13C
P1        7.80 us
PL1       -3.00 dB
SFO1      100.5996591 MHz

===== CHANNEL f2 =====
CPDPRG2  waltz16
NUC2      13C
P2        135.00 us
PL2       17.40 dB
SFO2      400.0116000 MHz

===== CHANNEL f3 =====
CPDPRG3  waltz16
NUC3      13C
P3        135.00 us
PL3       17.40 dB
SFO3      400.0116000 MHz
  
```

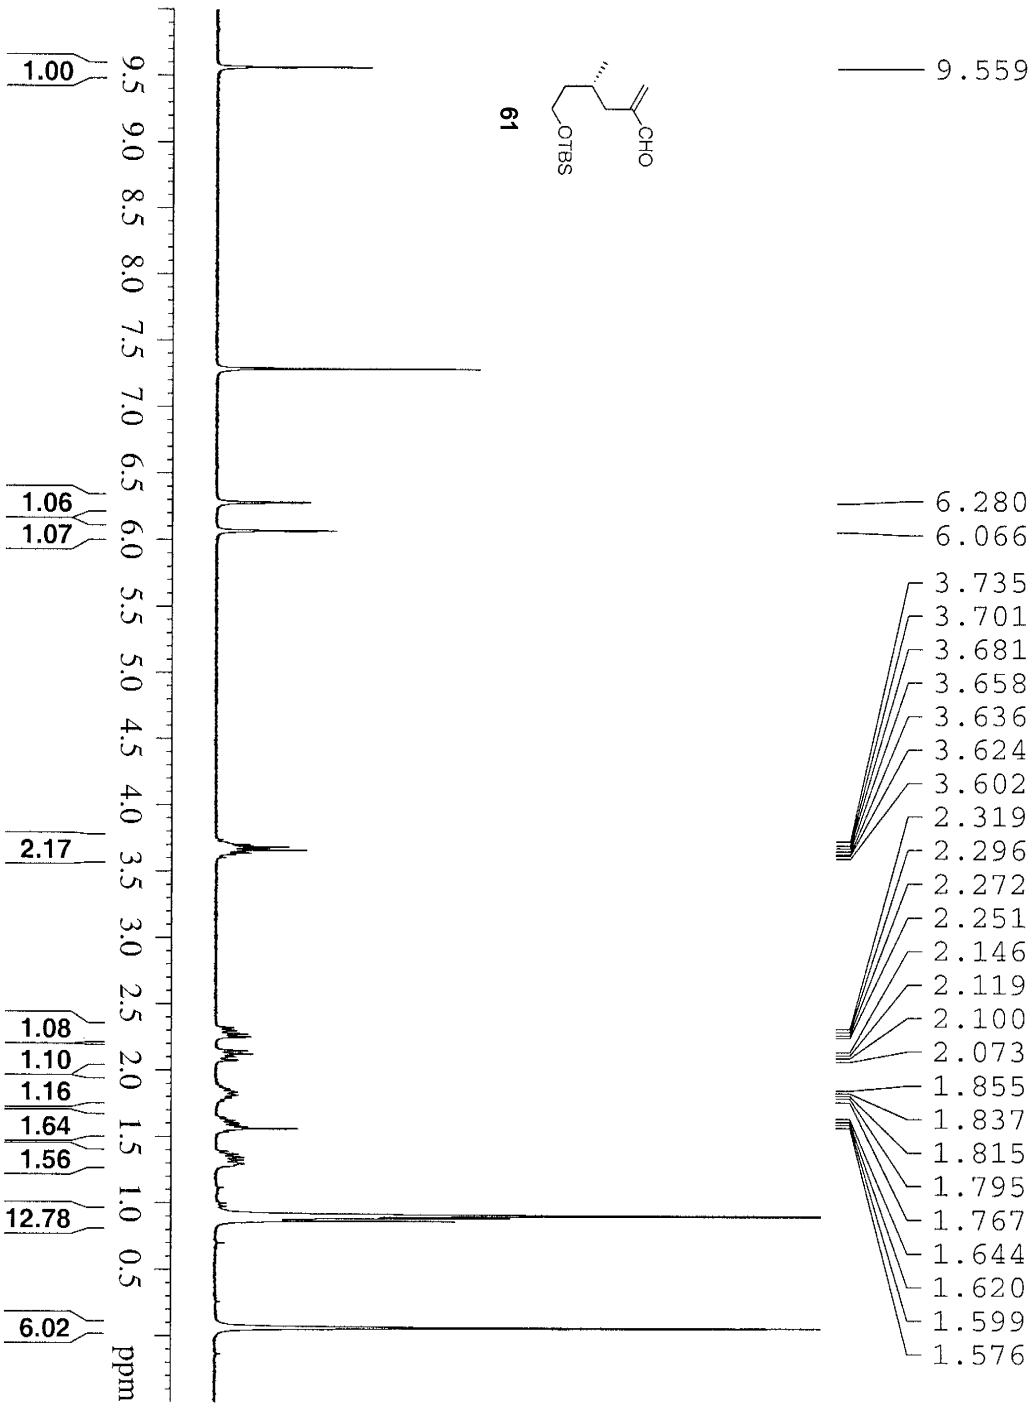

Current Data Parameters  
 Name: mp302-17-8 (612061)  
 EXNO: 1  
 PROCK: 1  
 B1: 1  
 B2: /n  
 USER: Liang

F2 - Acquisition Parameters  
 Date\_: 20060802  
 Time: 18.25  
 Run#: 1  
 F1: 400  
 F2: 100  
 F3: 400  
 F4: 400  
 F5: 400  
 F6: 400  
 F7: 400  
 F8: 400  
 F9: 400  
 F10: 400  
 PULPROG: zgpg30  
 TD: 32768  
 SOLVENT: CDCl3  
 NS: 1  
 DS: 4  
 SWH: 4789.272 Hz  
 FIDRES: 0.146157 Hz  
 AQ: 3.4240291 sec  
 NQ: 1024  
 DW: 104.400 usec  
 DE: 6.00 usec  
 TE: 298.2 K  
 D1: 2.00000000 sec  
 TDO: 1

===== CHANNEL F1 =====  
 NUC1: 1H  
 P1: 9.00 usec  
 PL1: -3.00 dB  
 SFO: 300.1321009 MHz

F2 - Processing parameters  
 SI: 32768  
 SF: 300.1300000 MHz  
 WID: no  
 SSB: 0  
 CB: 0.00 Hz  
 PC: 1.00

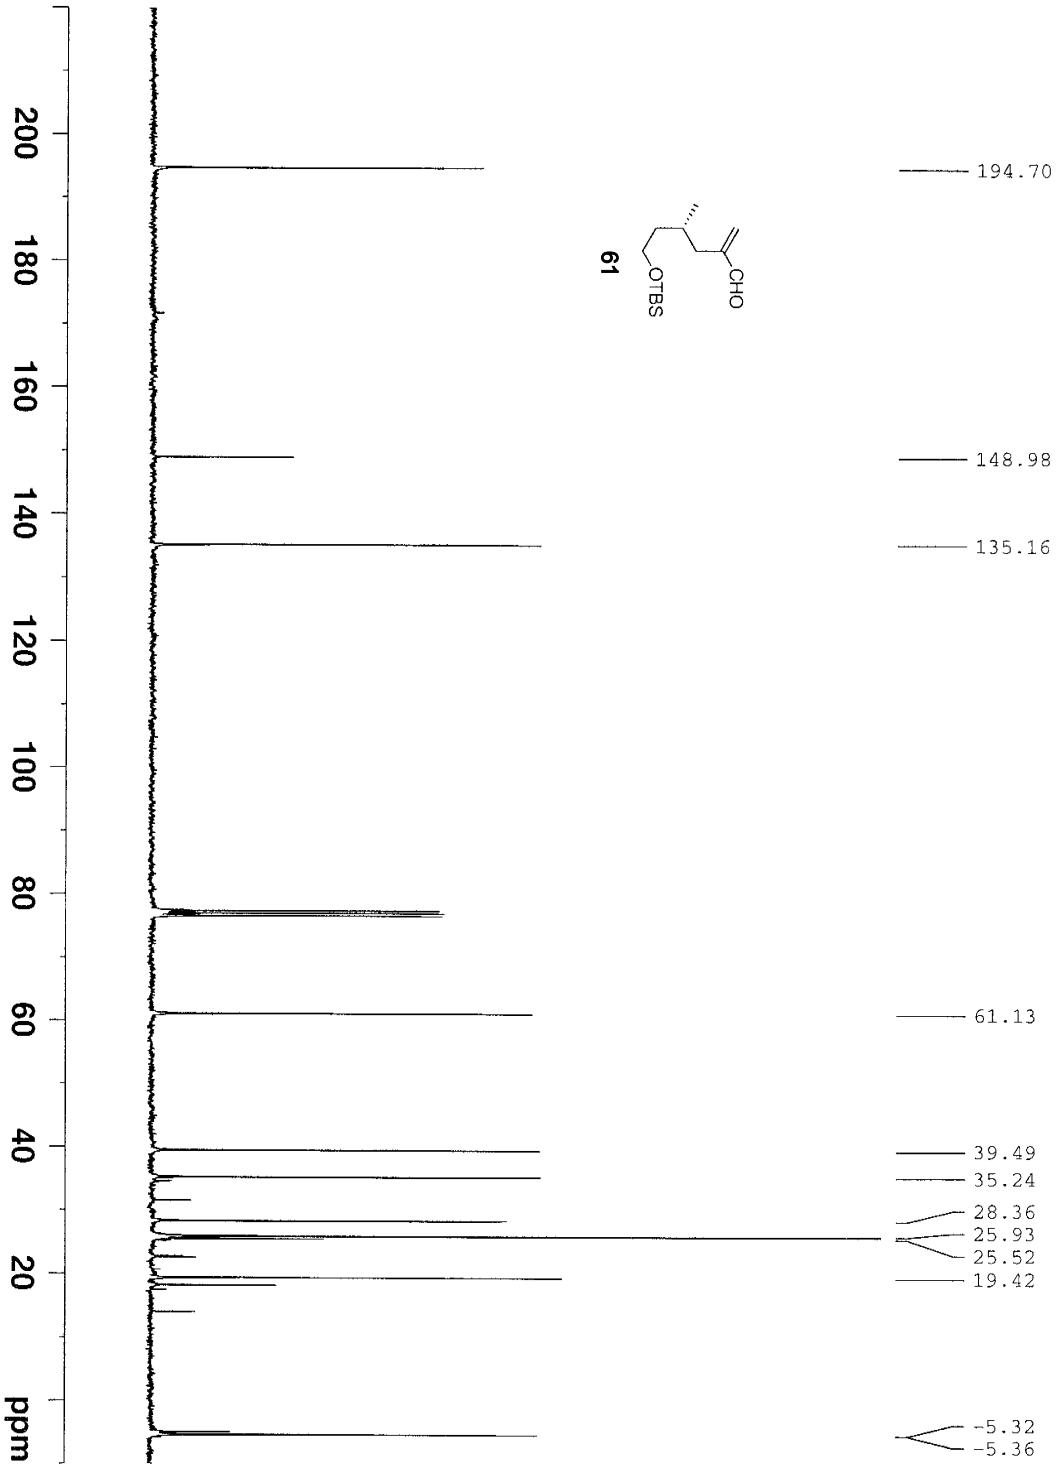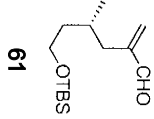

Current Data Parameters  
 NAME: 4q04b1-1V-DMP-topqput107  
 PROCNO: 1  
 F2: Acquisition Parameters  
 Date\_: 20060702  
 TIME: 09:10  
 INSTRUM: DSI300  
 PULPROG: zgpg30  
 PROCNO: 18/1  
 F2: 125.761 MHz  
 C1P15: 125.761 MHz  
 SOLVENT: CDCl3  
 NS: 1850  
 DS: 4  
 SWH: 18832.393 Hz  
 FIDRES: 0.287160 Hz  
 AQ: 1.7400208 sec  
 RG: 327.500  
 DQ: 26.550 usec  
 DE: 6.00 usec  
 TE: 298.2 K  
 T1: 0.15000000 sec  
 T1RHO: 0.05000000 sec  
 DELTA: 0.05000000 sec  
 TDD: 1  
 ===== CHANNEL f1 =====  
 NUC1: 13C 13C  
 P1: 9.00 usec  
 PL1: -1.00 dB  
 SFO: 75.476505 MHz  
 ===== CHANNEL f2 =====  
 CEPRGR2: CHANRR, f2  
 NUC2: 1H 1H  
 P2: 80.18 usec  
 PL2: 19.00 dB  
 F2: 400.146400 MHz  
 E2: 17.55 dB  
 F2: 300.131005 MHz  
 SFO2: 400.146400 MHz  
 F2 - Processing parameters  
 SI: 32768  
 SF: 75.4677486 MHz  
 WDW: EM  
 SSB: 0 Hz  
 GB: 3.00 Hz  
 PC: 1.40



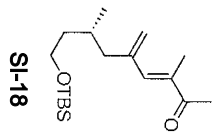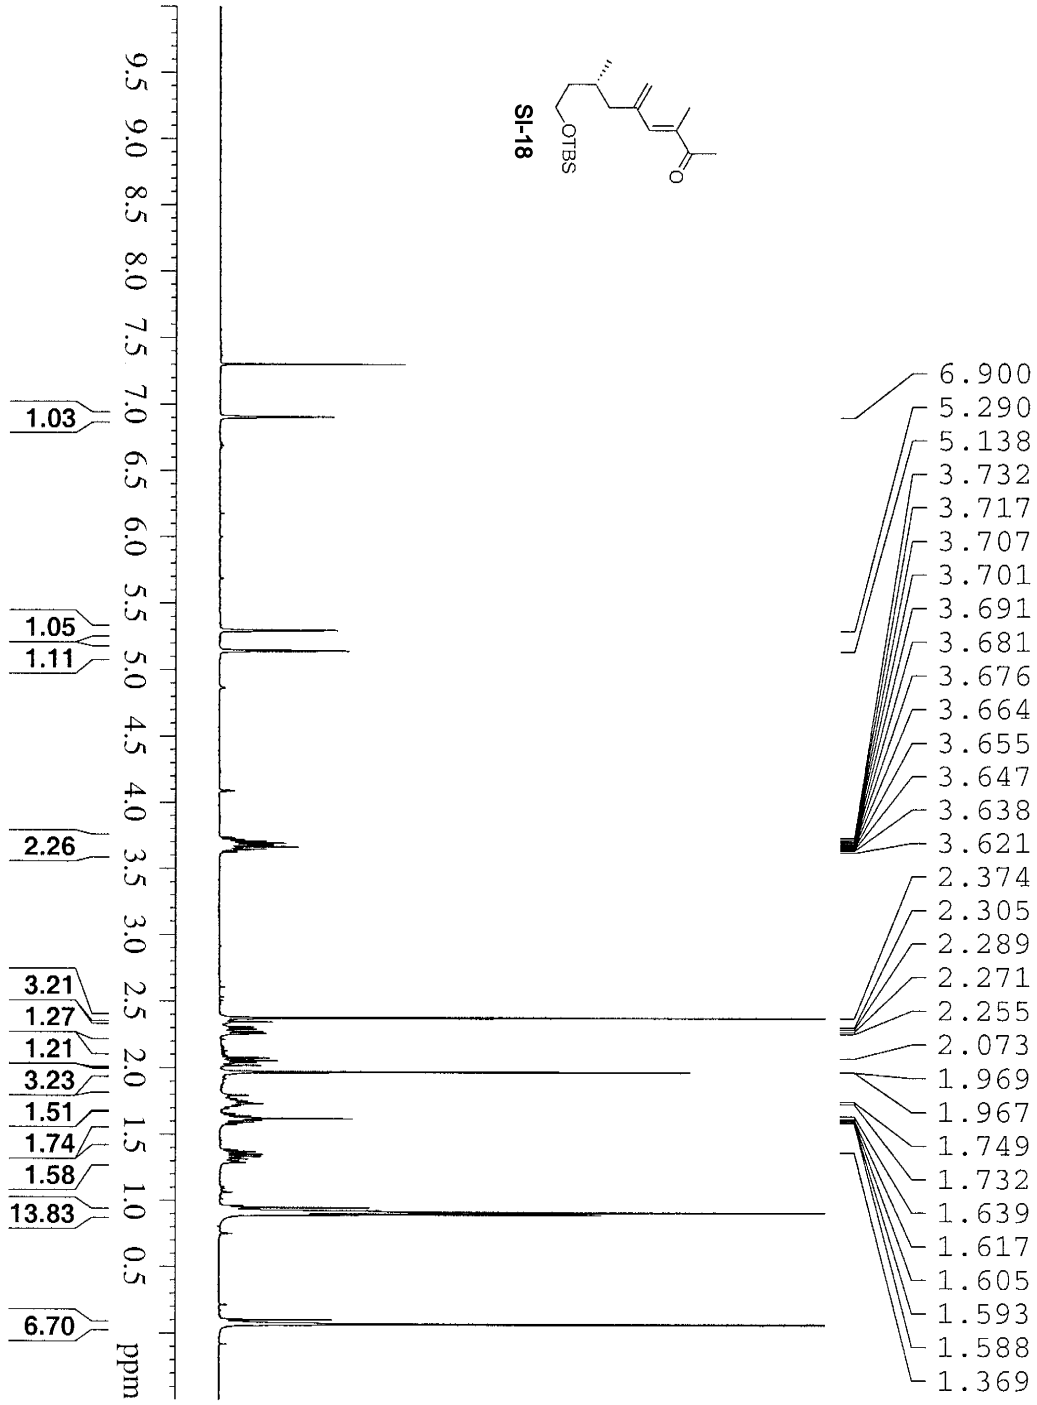

| Chemical Shift (ppm) |
|----------------------|
| 6.900                |
| 5.290                |
| 5.138                |
| 3.732                |
| 3.717                |
| 3.707                |
| 3.701                |
| 3.691                |
| 3.681                |
| 3.676                |
| 3.664                |
| 3.655                |
| 3.647                |
| 3.638                |
| 3.621                |
| 2.374                |
| 2.305                |
| 2.289                |
| 2.271                |
| 2.255                |
| 2.073                |
| 1.969                |
| 1.967                |
| 1.749                |
| 1.732                |
| 1.639                |
| 1.617                |
| 1.605                |
| 1.593                |
| 1.588                |
| 1.369                |

Current Data Parameters  
 Name: amp03-14-1 (091061)  
 EXNO: 1  
 DE: 1  
 DS: /h  
 F2 - Acquisition Parameters  
 Date\_: 20060703  
 Time: 14.18  
 P1: 12.18  
 PRGMR: 5 mm BBO  
 PULPROG: zg30  
 TD: 32768  
 SOLVENT: CDCl3  
 NS: 12  
 DS: 2  
 SWH: 6410.256 Hz  
 FIDRES: 0.195625 Hz  
 AQ: 2.592540 sec  
 RG: 327.68  
 TA: 78.400 usec  
 SFO: 400.128001 MHz  
 TE: 298.2 K  
 T1: 2.00000000 sec  
 T20: 1

\*\*\*\*\* CHANNEL F1 \*\*\*\*\*  
 NUC1: 1H  
 P1: 14.00 usec  
 PL1: 0.00 dB  
 SFO1: 400.128001 MHz

F2 - Processing parameters  
 SI: 32768  
 SF: 400.010000 MHz  
 WDW: no  
 SSB: 0  
 LB: 0.00 Hz  
 GB: 0  
 PC: 1.00

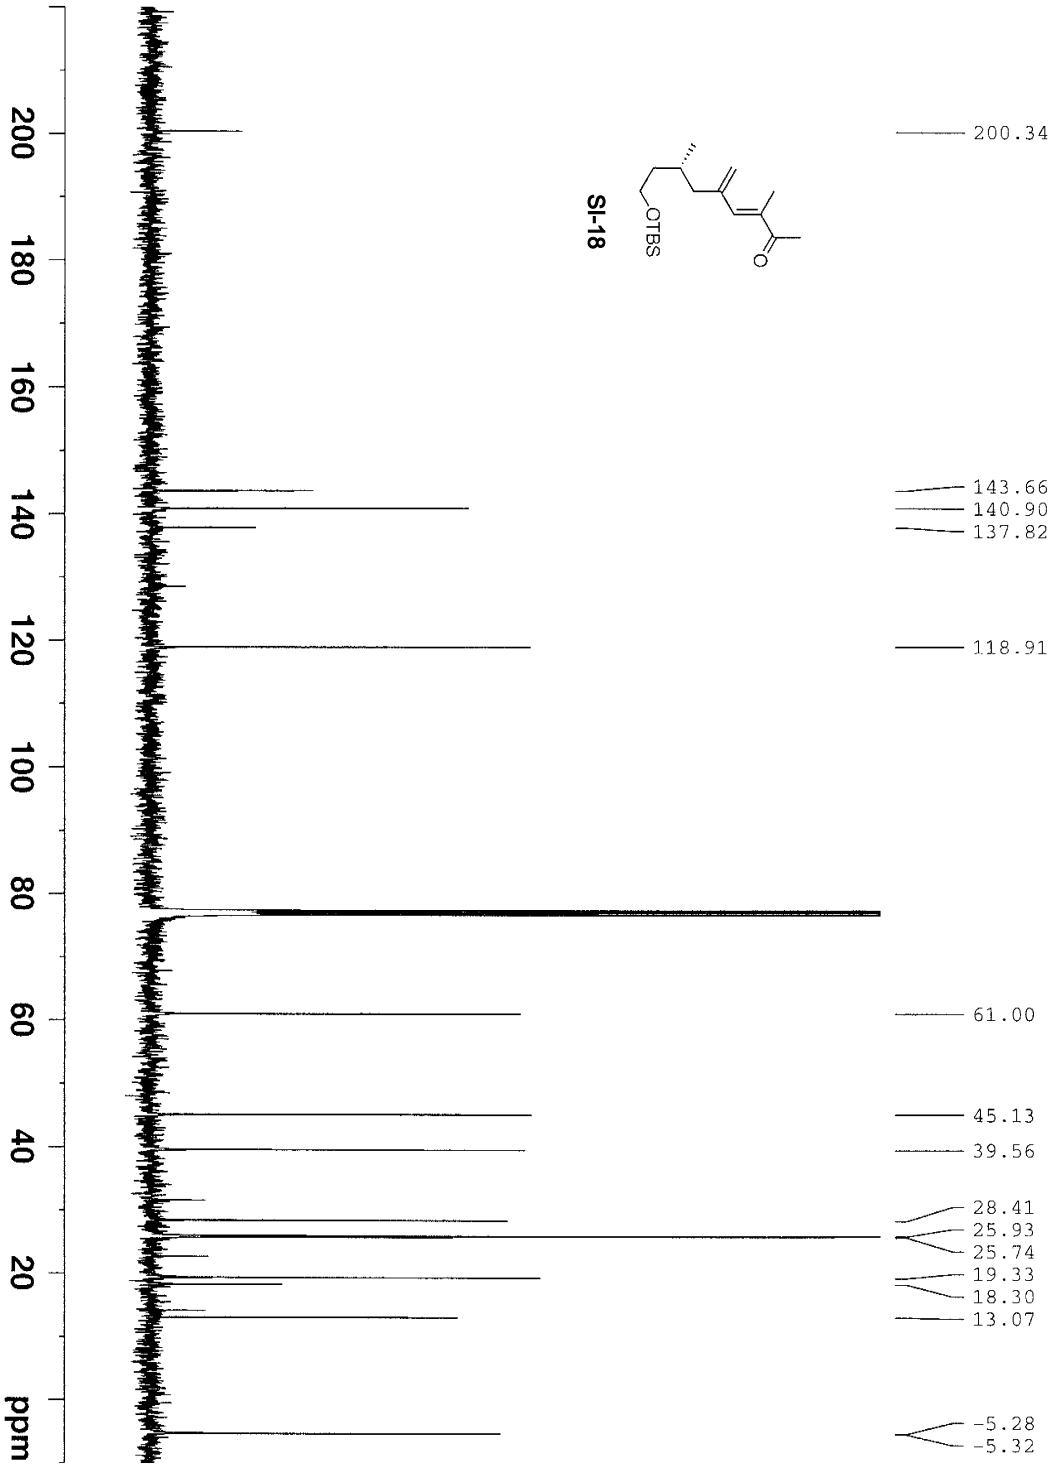

```

Current Data Parameters
NAME      ampdd1-iv-7(0703)
EXPNO    2
PROCNO   1
F2       /n
USER     Liang

F2 - Acquisition Parameters
Date_    20060703
Time     17.50
INSTRUM  DFX400
PROBHD   5 mm BBO BB-1H
PULPROG  zgpg30
TD        65536
SOLVENT  CDCl3
NS        2009
DS        2
SWH       25125.629 Hz
FIDRES    0.183387 Hz
AQ        1.3022164 sec
RG        4597.6
CW        19.900 usec
DE        6.00 usec
TE        298.2 K
D1        0.15000001 sec
d11       0.03000000 sec
DELTA    0.05000000 sec
TD0       1

===== CHANNEL f1 =====
NUC1      13C
P1        7.80 usec
SFO1     100.625591 MHz

===== CHANNEL f2 =====
CPDPRG2  waltz16
NUC2      1H
PCPD2    135.00 usec
P12      17.40 GHz
P13      17.40 GHz
SFO2     400.0156000 MHz

F2 - Processing parameters:
SI        32768
SF        100.625591 MHz
WDW       EM
SSB       0
GB        0
PC        1.40
  
```





alcohol

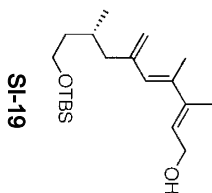

|       |
|-------|
| 5.988 |
| 5.833 |
| 5.818 |
| 5.800 |
| 5.097 |
| 5.095 |
| 5.092 |
| 4.886 |
| 4.372 |
| 4.356 |
| 3.723 |
| 3.709 |
| 3.705 |
| 3.698 |
| 3.691 |
| 3.683 |
| 3.679 |
| 3.673 |
| 3.665 |
| 3.656 |
| 3.648 |
| 3.638 |
| 3.630 |
| 3.613 |
| 2.216 |
| 2.201 |
| 2.183 |
| 2.167 |
| 2.008 |
| 2.006 |
| 1.987 |
| 1.967 |
| 1.954 |
| 1.933 |
| 1.882 |
| 1.743 |
| 1.721 |
| 1.710 |
| 1.694 |
| 1.649 |
| 1.637 |
| 1.632 |
| 1.619 |
| 1.616 |
| 1.598 |
| 1.585 |
| 1.580 |
| 1.567 |
| 1.457 |
| 1.433 |
| 1.377 |

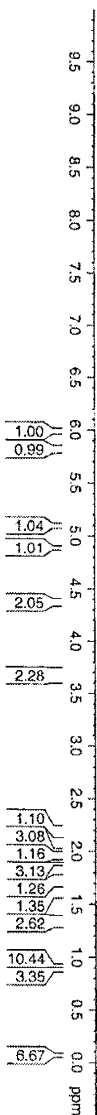

```

Current Data Parameters
NAME          SI-19 (071706)
EXPNO        1
PROCNO       1
PROCNAME     /
USER         Liang

F2 - Acquisition Parameters
-----
Date_         20070717
Time         16.25
INSTRUM      spect
PROBHD       5 mm BBO BB30
PULPROG      zgpg30
TD           32768
SOLVENT      CDCl3
DS           2
SWH          6410.256 Hz
FIDRES       0.158625 Hz
AQ           2.525812 sec
RG           312
AQ           78.000 usec
RG           286.2 usec
TE           298.2 K
DE           2.0000000 sec
D1           1

===== CHANNEL f1 =====
NUC1          1H
P1           14.00 usec
PL1          0.00 dB
SFO1         400.0128001 MHz

F2 - Processing parameters
-----
SI           400.0100000 MHz
SF          400.0128001 MHz
WDW         EM
SSB         0
LB          0.00 Hz
GB          0
PC          1.00
  
```

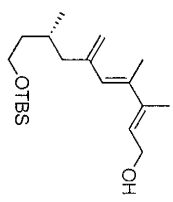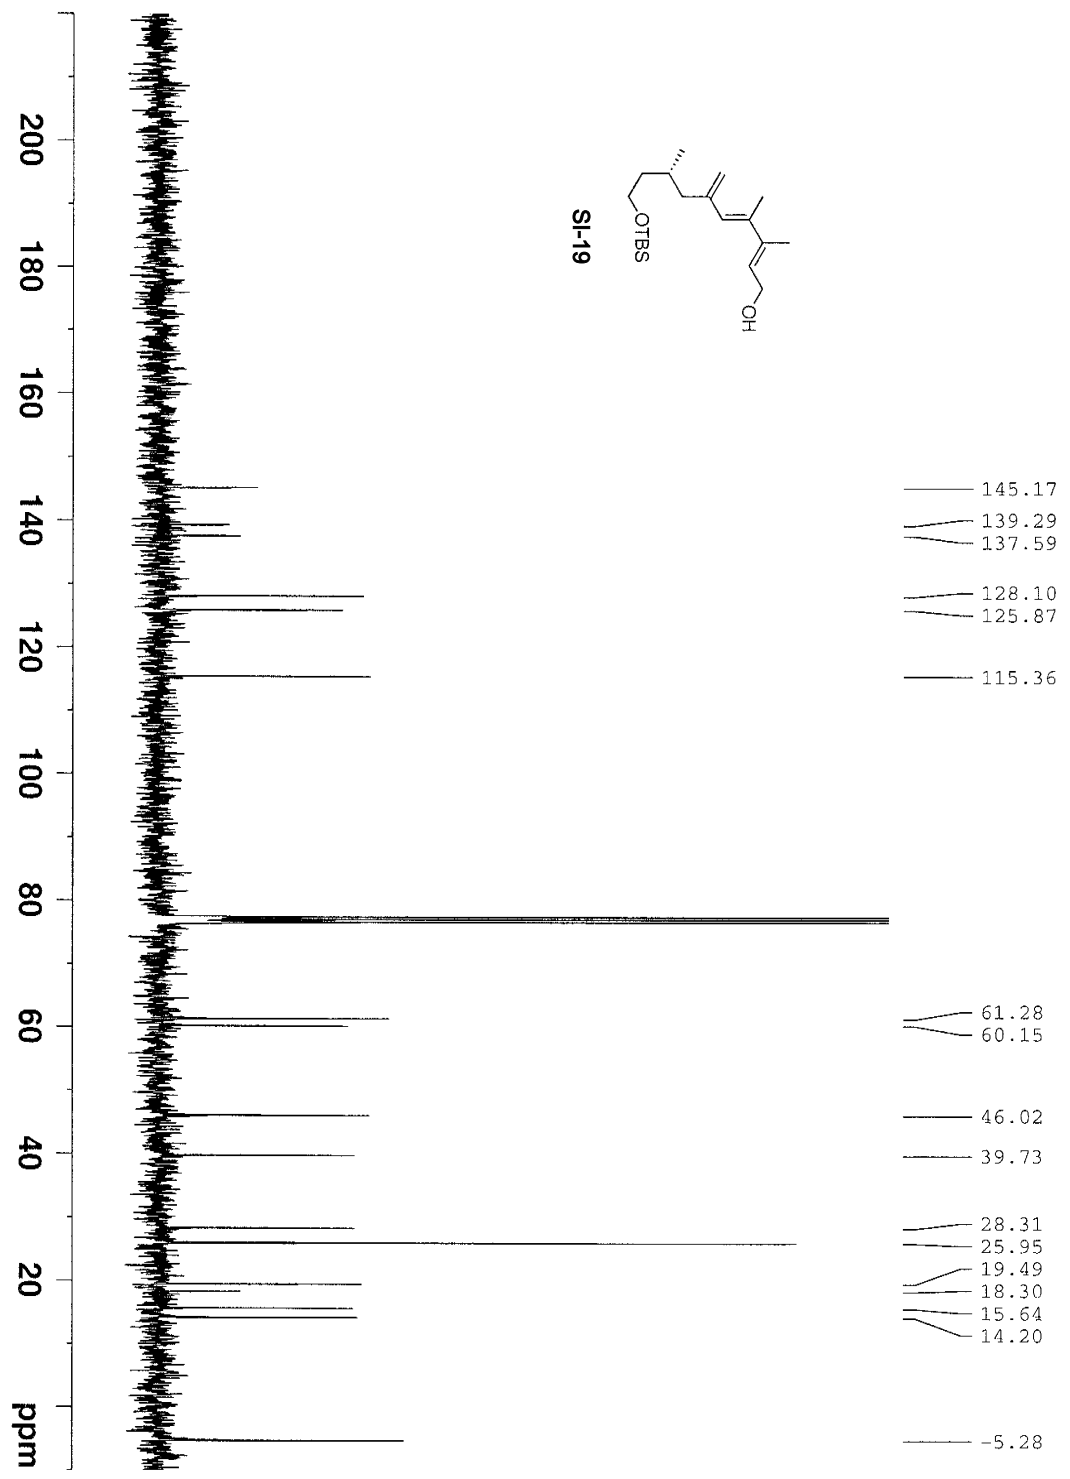

- 145.17
- 139.29
- 137.59
- 128.10
- 125.87
- 115.36
- 61.28
- 60.15
- 46.02
- 39.73
- 28.31
- 25.95
- 19.49
- 18.30
- 15.64
- 14.20
- 5.28

```

Current Data Parameters
NAME ampdb1-1v-910808
EXPNO 2
PROCNO 1
DU /h
USER Liang

F2 - Acquisition Parameters
Date_ 20060808
Time 12.31
INSTRUM 5 mm QNP 1H/1
PROBHD zgpg30
PULPROG zgpg30
TD 65536
SOLVENT CDCl3
NS 492
DS 4
SWH 18832.393 Hz
FIDRES 0.287766 Hz
AQ 1.7440308 s
RG 10321.3
DM 26.550 uS
DE 6.00 uS
TE 298.2 K
D1 0.15000001 s
d11 0.03000000 s
DELTA 0.05000000 s
TDO 1

===== CHANNEL f1 =====
NUC1 13C
P1 8.00 uS
PL1 -3.00 dB
SFO1 75.476505 MHz

===== CHANNEL f2 =====
CPDPRG2 waltz16
NUC2 1H
PCPD2 80.00 uS
PL2 -3.00 dB
PL12 17.55 dB
PL13 17.55 dB
SFO2 300.1312005 MHz

F2 - Processing parameters
SI 32768
SF 75.4677490 MHz
WDW EM
SSB 0
LB 3.00 Hz
GB 0
PC 1.40
  
```

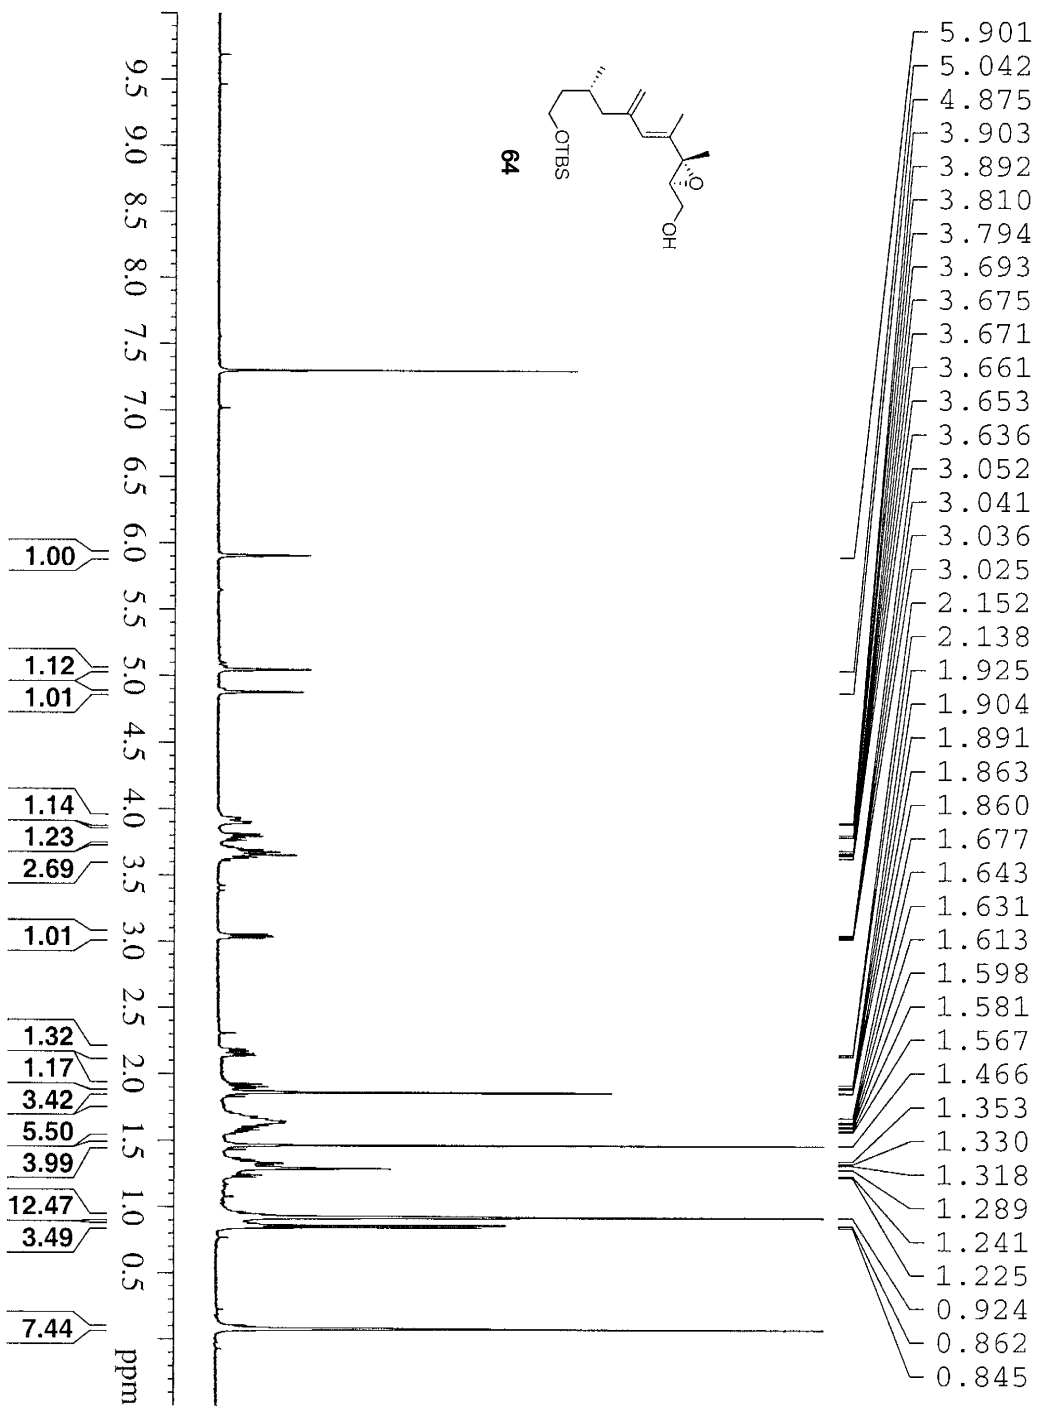

```

Current Data Parameters
EXPNO          1
PROCNO         1
F2 - Acquisition Parameters
Date_          20080719
Time           17.34
INSTRUM       DRK400
PROBHD        5 mm BBO 5mm1H
PULPROG       zgpg30
TD             32768
SOLVENT       CDCl3
NS            32
DS            2
SWH           6410.256 Hz
FIDRES       0.1966265 Hz
AQ           2.1559540 sec
RG           78.010
BR           6.00 usec
DE           238.2 K
TE           300.2 K
D1           2.00000000 sec
TD0          1
===== CHANNEL f1 =====
NUC1          1H
P1           14.70 usec
PL1          0.00 dB
SFO1         400.0128001 MHz
F2 - Processing parameters
SI           32768
SF           400.0100000 MHz
WDW          EM
SSB          0
LB           0.00 Hz
GB           0
PC           1.00
  
```

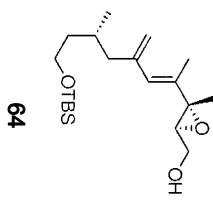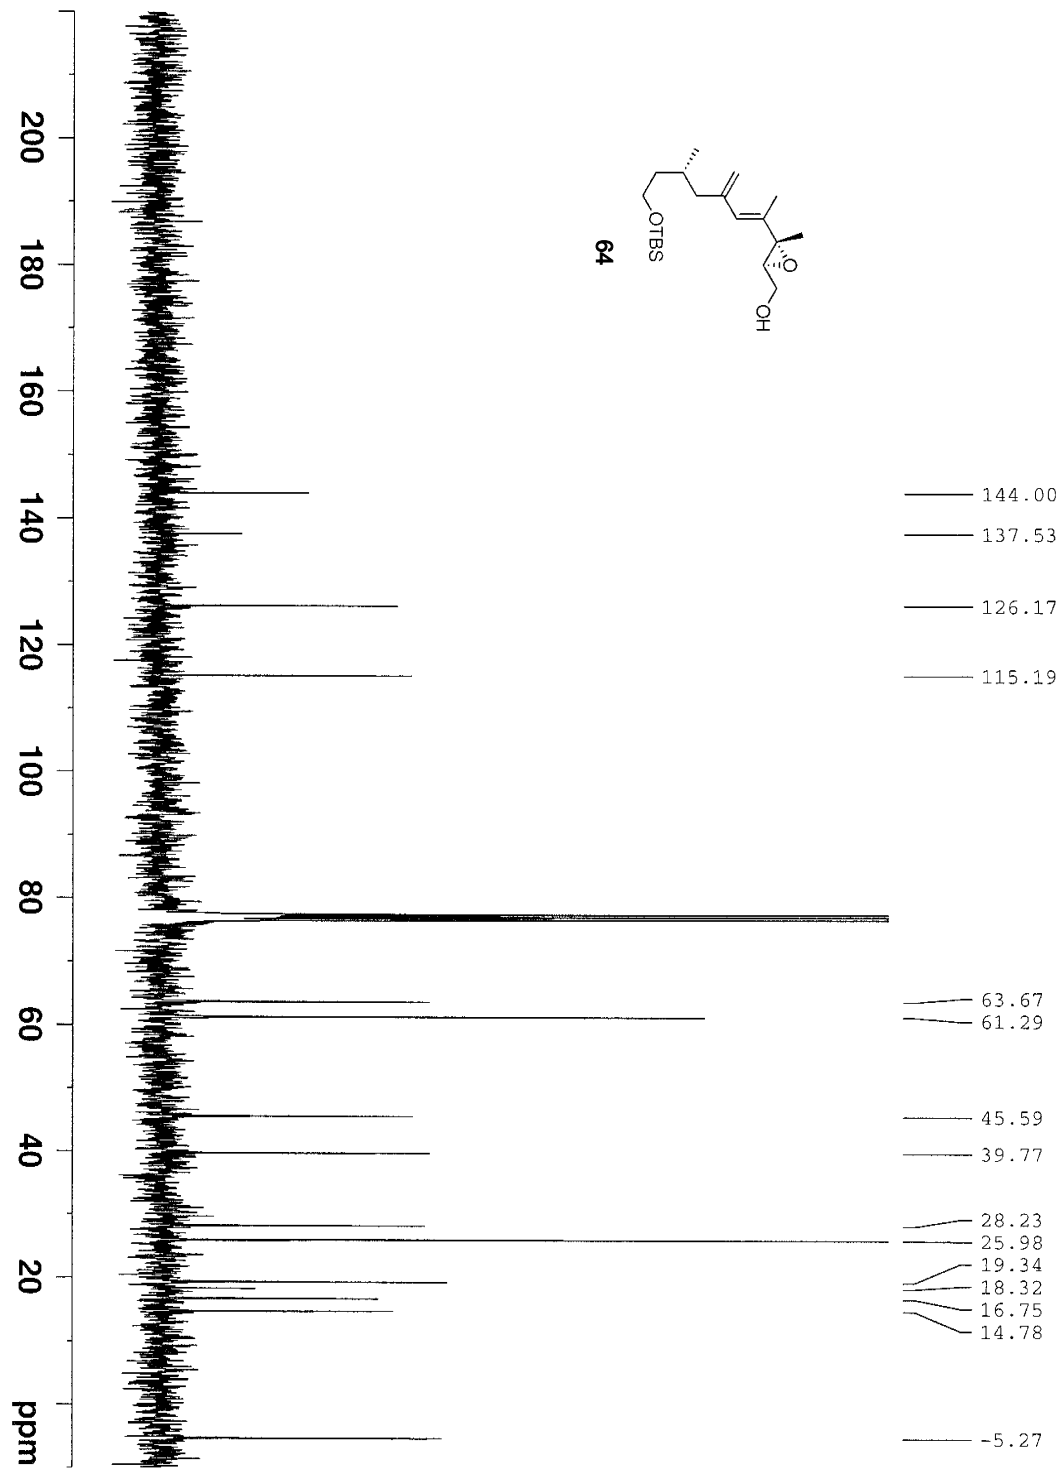

```

Current Data Parameters
NAME      angphd1-1v-11-21071
EXPNO    2
PROCNO   1
SOLVENT  /n
USER     L:ang
===== Acquisition Parameters
Date_    20060711
Time     17.50
INSTRUM  DEK300
PROBHD   5 mm QNP 1H/1
PULPROG  zgpg30
TD        65536
SOLVENT  CDCl3
NS        1074
DS        4
SWH       18832.393 Hz
FIDRES    0.287360 Hz
AQ         9195.2
RG         26.550 use
DE         6.00 use
TE         298.2 K
===== Processing parameters
SI         32768
SF         75.4677490 MHz
WDW        EM
SSB        0
LB         3.00 Hz
GB         0
PC         1.40
===== CHANNEL f1 =====
NUC1       13C
P1         8.88 use
PL1        -3.00 dB
SFO1       75.4760503 MHz
===== CHANNEL f2 =====
CHPRG2    waltz16
NUC2       1H
PCPD2     80.00 use
PL2        -3.00 dB
PL12      17.55 dB
PL13      17.55 dB
SFO2       300.1312005 MHz
===== Processing parameters
SI         32768
SF         75.4677490 MHz
WDW        EM
SSB        0
LB         3.00 Hz
GB         0
PC         1.40
  
```





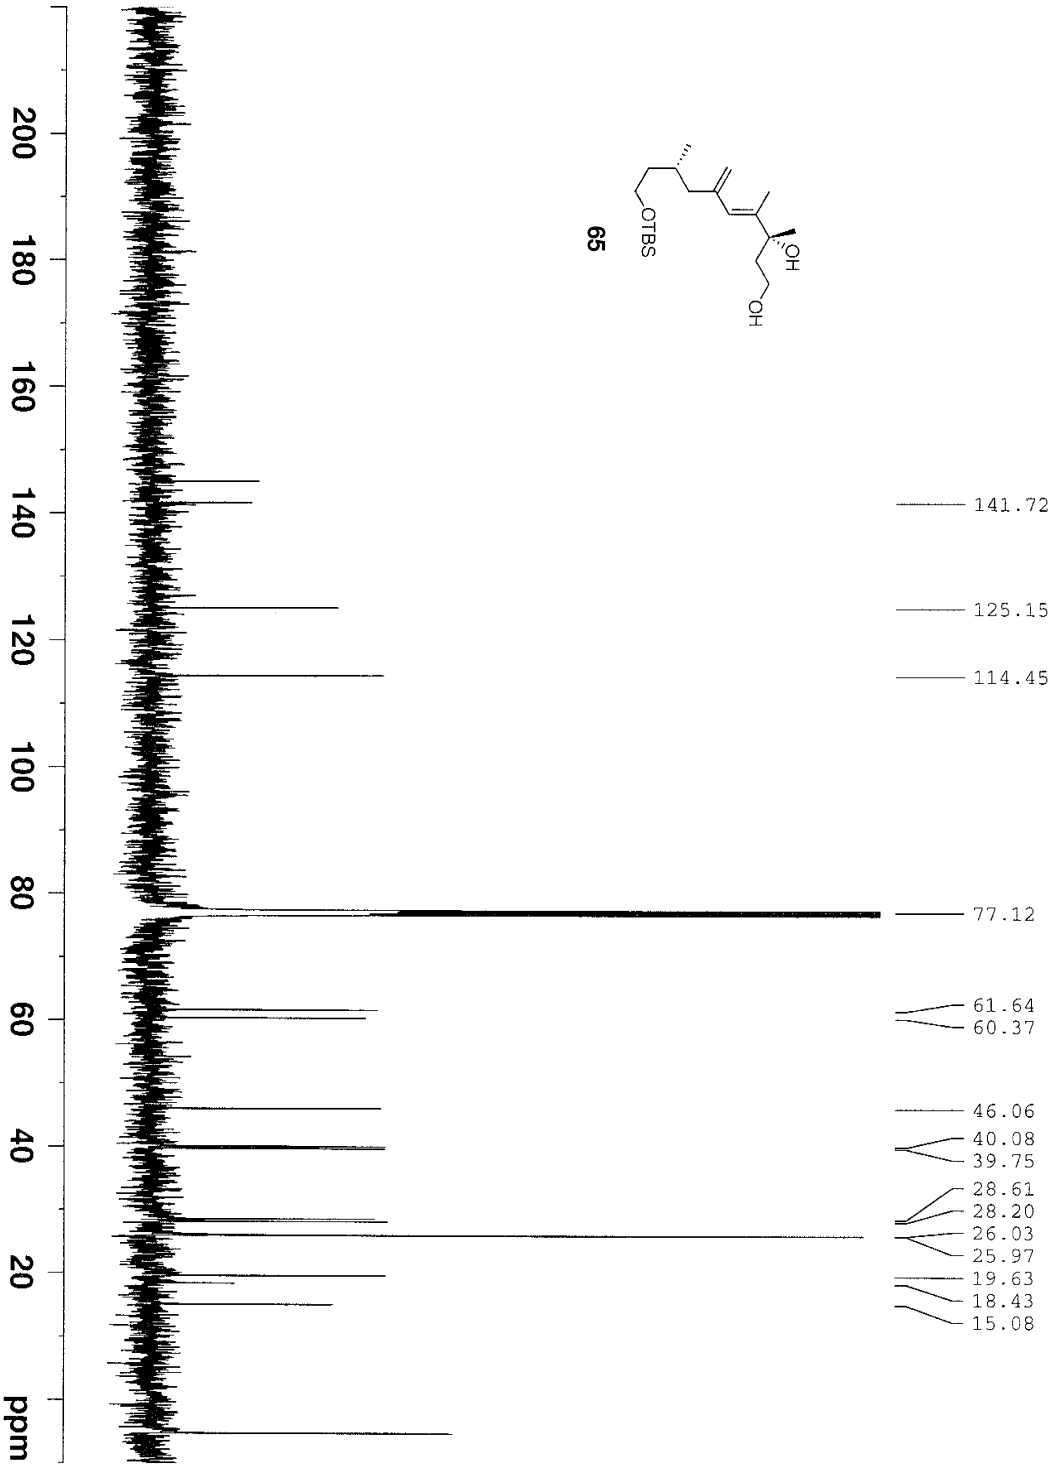

- 141.72
- 125.15
- 114.45
- 77.12
- 61.64
- 60.37
- 46.06
- 40.08
- 39.75
- 28.61
- 28.20
- 26.03
- 25.97
- 19.63
- 18.43
- 15.08

Current Data Parameters  
 NAME ampdb1-IV-11-diol(072)  
 EXPNO 4  
 PROCNO 1  
 F2 - Acquisition Parameters  
 Date\_ 2006/7/20  
 Time 11:00:00  
 INSTRUM DSI400  
 PRCBHD 5 mm HHD BB-1H  
 PULPROG zgpg30  
 TD 65536  
 F2 - Processing Parameters  
 SI 32768  
 SF 100.626390 MHz  
 MDW 0  
 SSB 0  
 LB 3.00 Hz  
 GB 0  
 PC 1.40

===== CHANNEL f1 =====  
 NUC1 13C  
 P1 7.50 usec  
 PL1 -3.00 dB  
 SFO1 100.626391 MHz  
 ===== CHANNEL f2 =====  
 CPDPRG2 waltz16  
 NUC2 1H  
 PCPD2 135.00 usec  
 F2 17.40 dB  
 F2 17.40 dB  
 F2 17.40 dB  
 SFO2 400.0116000 MHz

===== CHANNEL f3 =====  
 NUC3 13C  
 P1 7.50 usec  
 PL1 -3.00 dB  
 SFO1 100.626391 MHz

===== CHANNEL f4 =====  
 NUC4 1H  
 P1 7.50 usec  
 PL1 -3.00 dB  
 SFO1 400.0116000 MHz

===== CHANNEL f5 =====  
 NUC5 13C  
 P1 7.50 usec  
 PL1 -3.00 dB  
 SFO1 100.626391 MHz

===== CHANNEL f6 =====  
 NUC6 1H  
 P1 7.50 usec  
 PL1 -3.00 dB  
 SFO1 400.0116000 MHz

===== CHANNEL f7 =====  
 NUC7 13C  
 P1 7.50 usec  
 PL1 -3.00 dB  
 SFO1 100.626391 MHz

===== CHANNEL f8 =====  
 NUC8 1H  
 P1 7.50 usec  
 PL1 -3.00 dB  
 SFO1 400.0116000 MHz

===== CHANNEL f9 =====  
 NUC9 13C  
 P1 7.50 usec  
 PL1 -3.00 dB  
 SFO1 100.626391 MHz

===== CHANNEL f10 =====  
 NUC10 1H  
 P1 7.50 usec  
 PL1 -3.00 dB  
 SFO1 400.0116000 MHz

===== CHANNEL f11 =====  
 NUC11 13C  
 P1 7.50 usec  
 PL1 -3.00 dB  
 SFO1 100.626391 MHz

===== CHANNEL f12 =====  
 NUC12 1H  
 P1 7.50 usec  
 PL1 -3.00 dB  
 SFO1 400.0116000 MHz

===== CHANNEL f13 =====  
 NUC13 13C  
 P1 7.50 usec  
 PL1 -3.00 dB  
 SFO1 100.626391 MHz

===== CHANNEL f14 =====  
 NUC14 1H  
 P1 7.50 usec  
 PL1 -3.00 dB  
 SFO1 400.0116000 MHz

===== CHANNEL f15 =====  
 NUC15 13C  
 P1 7.50 usec  
 PL1 -3.00 dB  
 SFO1 100.626391 MHz

===== CHANNEL f16 =====  
 NUC16 1H  
 P1 7.50 usec  
 PL1 -3.00 dB  
 SFO1 400.0116000 MHz

===== CHANNEL f17 =====  
 NUC17 13C  
 P1 7.50 usec  
 PL1 -3.00 dB  
 SFO1 100.626391 MHz

===== CHANNEL f18 =====  
 NUC18 1H  
 P1 7.50 usec  
 PL1 -3.00 dB  
 SFO1 400.0116000 MHz

===== CHANNEL f19 =====  
 NUC19 13C  
 P1 7.50 usec  
 PL1 -3.00 dB  
 SFO1 100.626391 MHz

===== CHANNEL f20 =====  
 NUC20 1H  
 P1 7.50 usec  
 PL1 -3.00 dB  
 SFO1 400.0116000 MHz

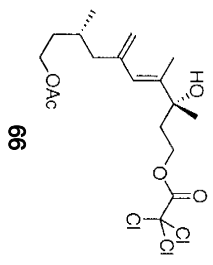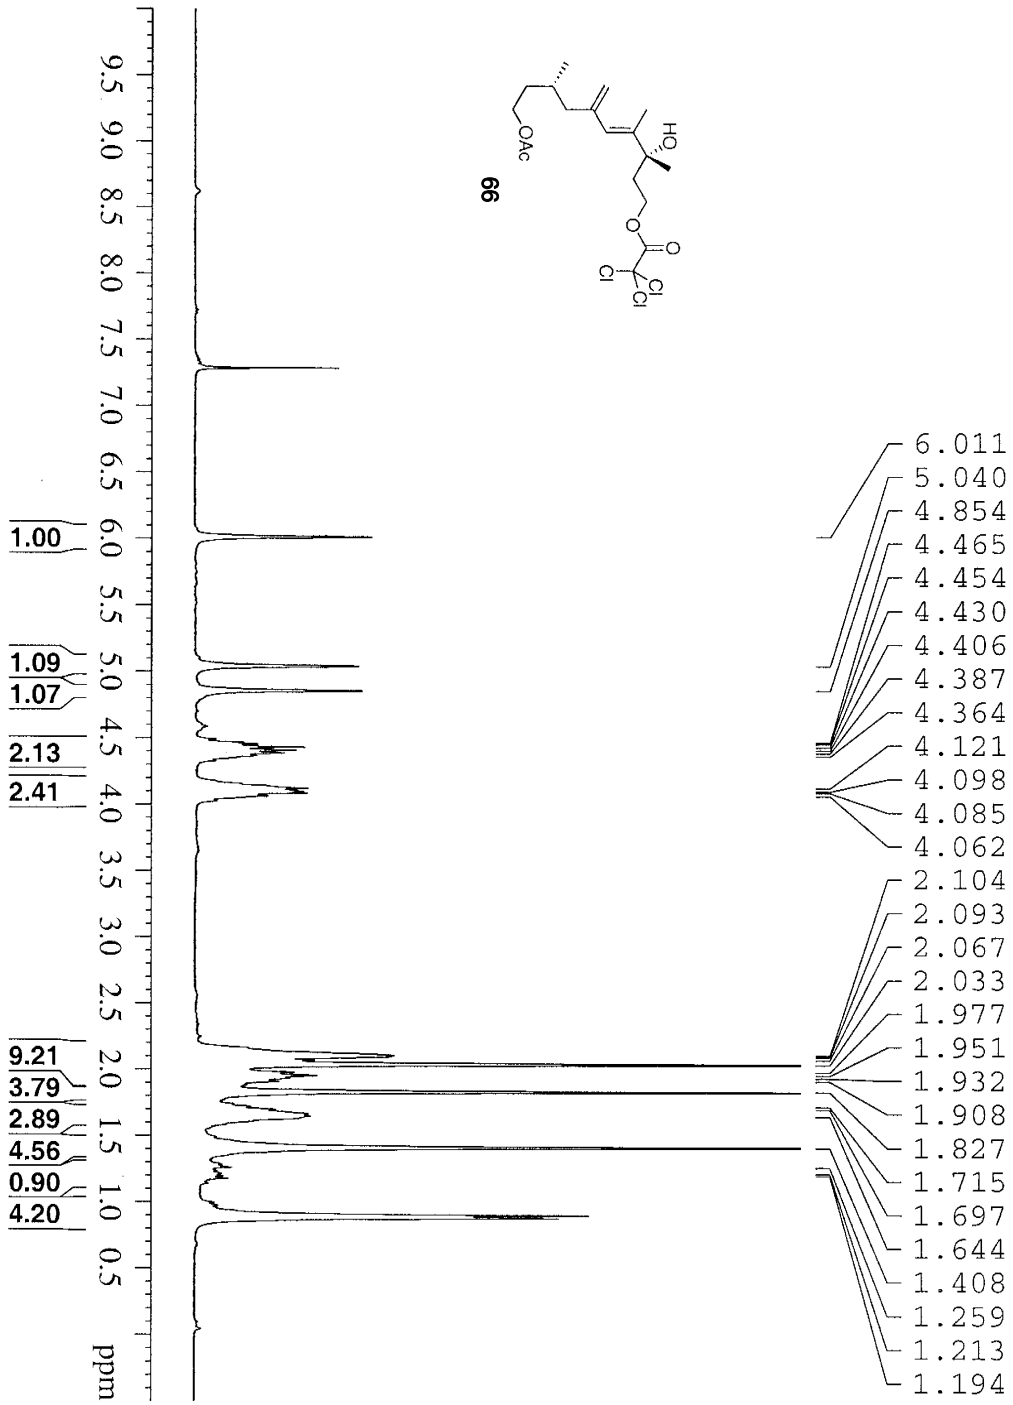

Current Data Parameters  
 Name: 7-79-2  
 EXNO: 1  
 PROCNO: 1  
 IN: /h  
 USER: Liang

F2 - Acquisition Parameters  
 Date\_: 20080205  
 Time: 10.23  
 Operator: JYK/LL  
 PROBHD: 5 mm QNP  
 PULPROG: zgpg30  
 TD: 32768  
 SOLVENT: CDCl3  
 DS: 12  
 SWH: 4789.272 Hz  
 FIDRES: 0.146157 Hz  
 AQ: 3.4210291 sec  
 EQ: 104.400 usec  
 DE: 6.00 usec  
 TE: 298.2 K  
 D1: 2.00000000 sec  
 D10: 1

===== CHANNEL f1 =====  
 NUC1: 1H  
 P1: 9.00 usec  
 PL1: -1.00 dB  
 SFO1: 300.132009 MHz

F2 - Processing parameters  
 SI: 300.132009 MHz  
 WDW: no  
 SSB: 0  
 LB: 0.00 Hz  
 GB: 0  
 PC: 1.00

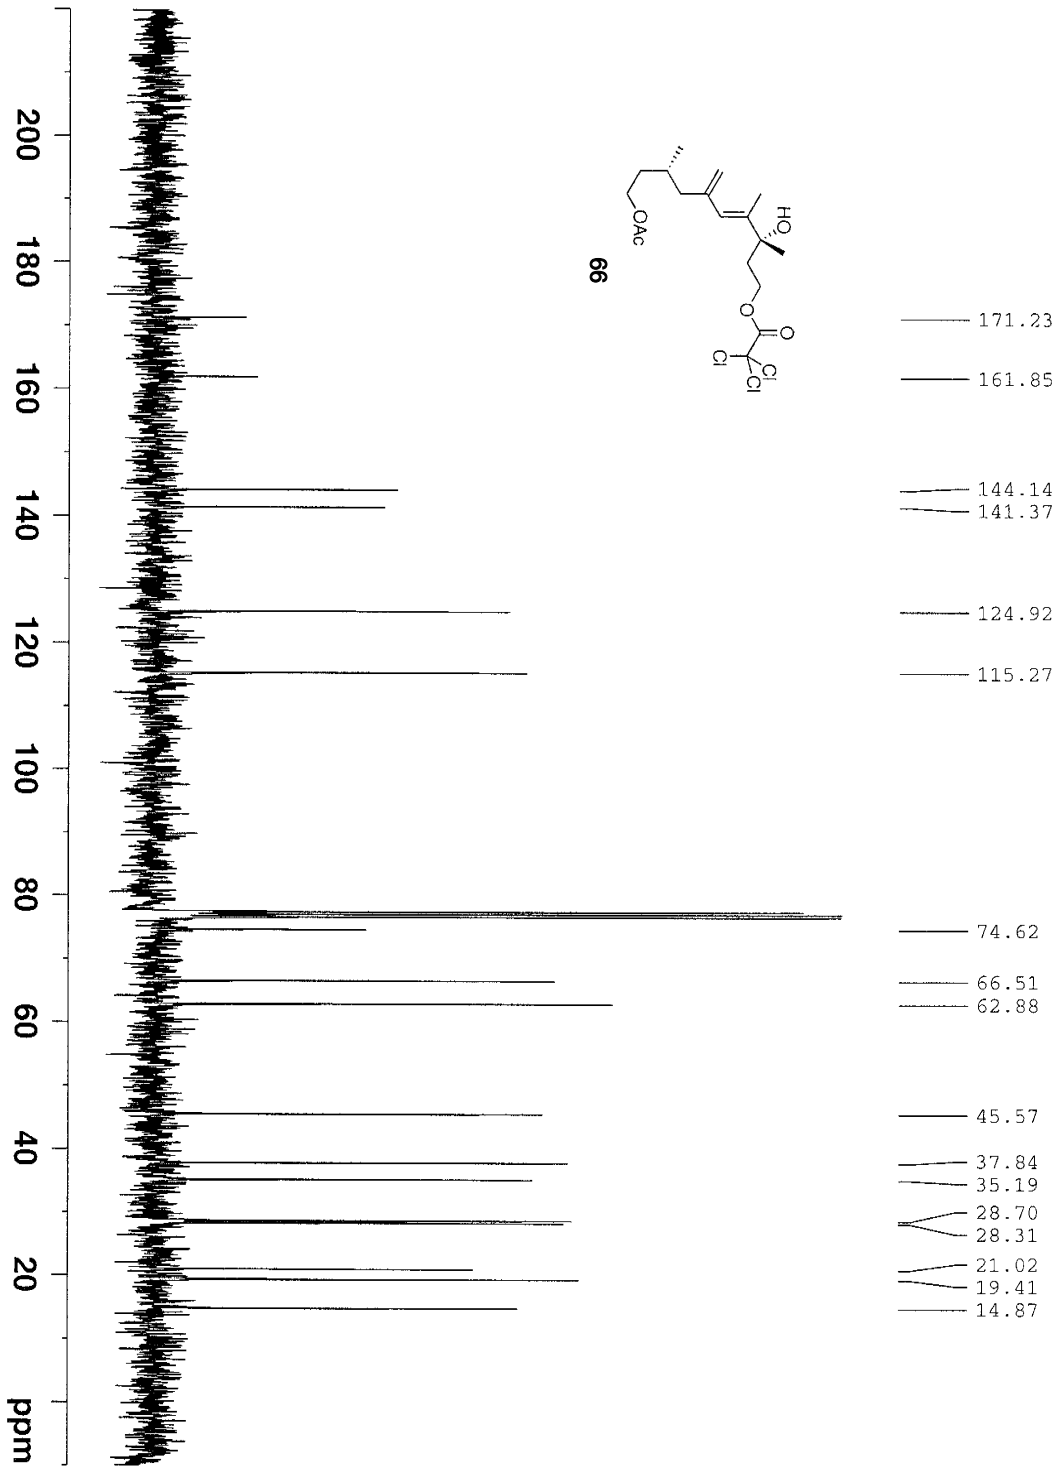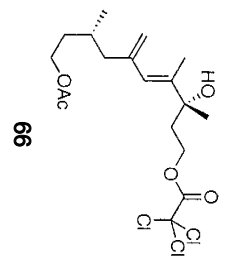

- 171.23
- 161.85
- 144.14
- 141.37
- 124.92
- 115.27
- 74.62
- 66.51
- 62.88
- 45.57
- 37.84
- 35.19
- 28.70
- 28.31
- 21.02
- 19.41
- 14.87

Current Data Parameters  
 NAME 7-75-2  
 EXPMO 3  
 PROCNO 1  
 EX /n  
 USER Liang

F2 - Acquisition Parameters  
 Date\_ 20080205  
 Time 10.26  
 INSTRUM DPX300  
 PROBHD 5 mm QNP 1H/1  
 PULPROG zgpg30  
 TD 65536  
 SOLVENT CDCl3  
 NS 136  
 DS 4  
 SH 18812.284 Hz  
 FIDRES 0.287160 Hz  
 AQ 1.7400308 sec  
 RG 9195.2  
 DM 25.550 us  
 DE 6.00 us  
 TE 298.2 K  
 D1 0.15000001 sec  
 d11 0.03000000 sec  
 DELTA 0.05000000 sec  
 TD0 1

==== CHANNEL f1 =====  
 NUCl 13C  
 P1 8.86 us  
 PL1 -3.00 dB  
 SF01 75.476505 MHz

==== CHANNEL f2 =====  
 CDPORG2 waterz16  
 NUC2 1H  
 PCPD2 80.00 us  
 P22 -3.00 dB  
 P112 17.55 dB  
 P113 17.55 dB  
 SF02 300.1312005 MHz

F2 - Processing parameters:  
 S1 32768  
 SF 75.4677490 MHz  
 WDW EM  
 SSB 0  
 LB 3.00 Hz  
 GB 0  
 PC 1.40

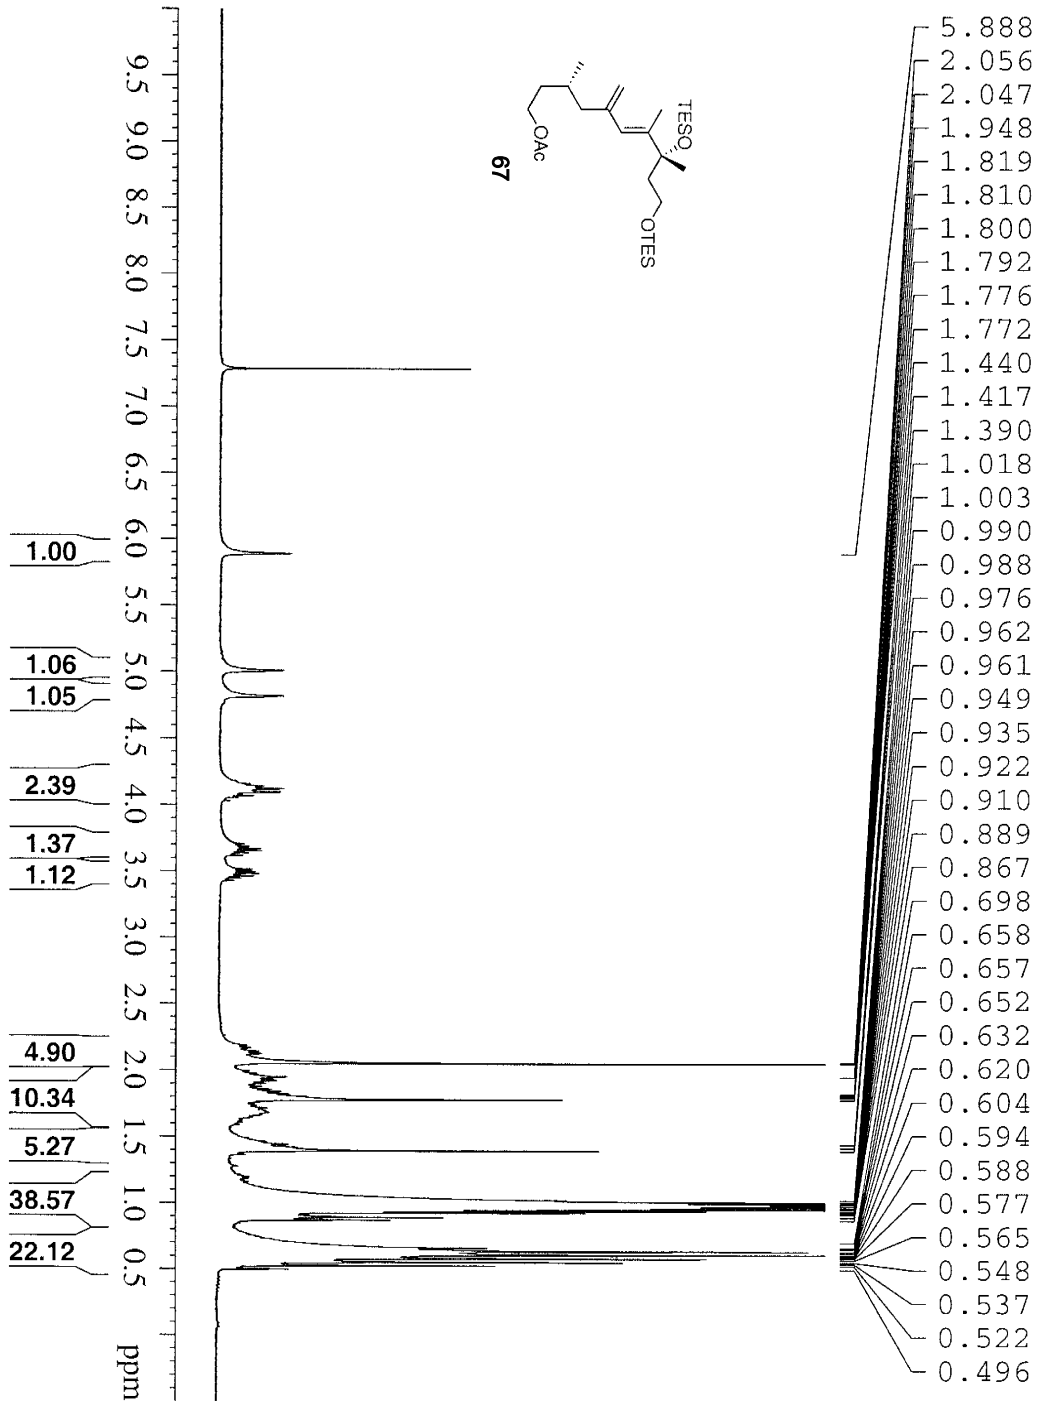

Current Data Parameters  
 Name: 7-18-1  
 EXPNO: 1  
 PROCNO: 1  
 DU: 1  
 USER: /n  
 Listing

F2 - Acquisition Parameters  
 Date\_: 20080214  
 Time: 15:26  
 INSTRUM: DPX100  
 PULPROG: zgpg30  
 TD: 32768  
 SOLVENT: CDCl3  
 DS: 2  
 SSB: 4789.272 Hz  
 FIDRES: 0.146157 Hz  
 AQ: 3.4210291 sec  
 RG: 104.400  
 DE: 5.00 usec  
 TE: 298.2 K  
 D1: 2.00000000 sec  
 TDO: 1

\*\*\*\*\* CHANNEL f1 \*\*\*\*\*  
 NUCL1: 1H  
 P1: 0.00 usec  
 PL1: -3.00 dB  
 SFO1: 300.1321009 MHz

F2 - Processing parameters  
 SI: 300.130000 MHz  
 SF: 300.130000 MHz  
 KW: 0  
 SSB: 0  
 LB: 0.00 Hz  
 GB: 0  
 PC: 1.00

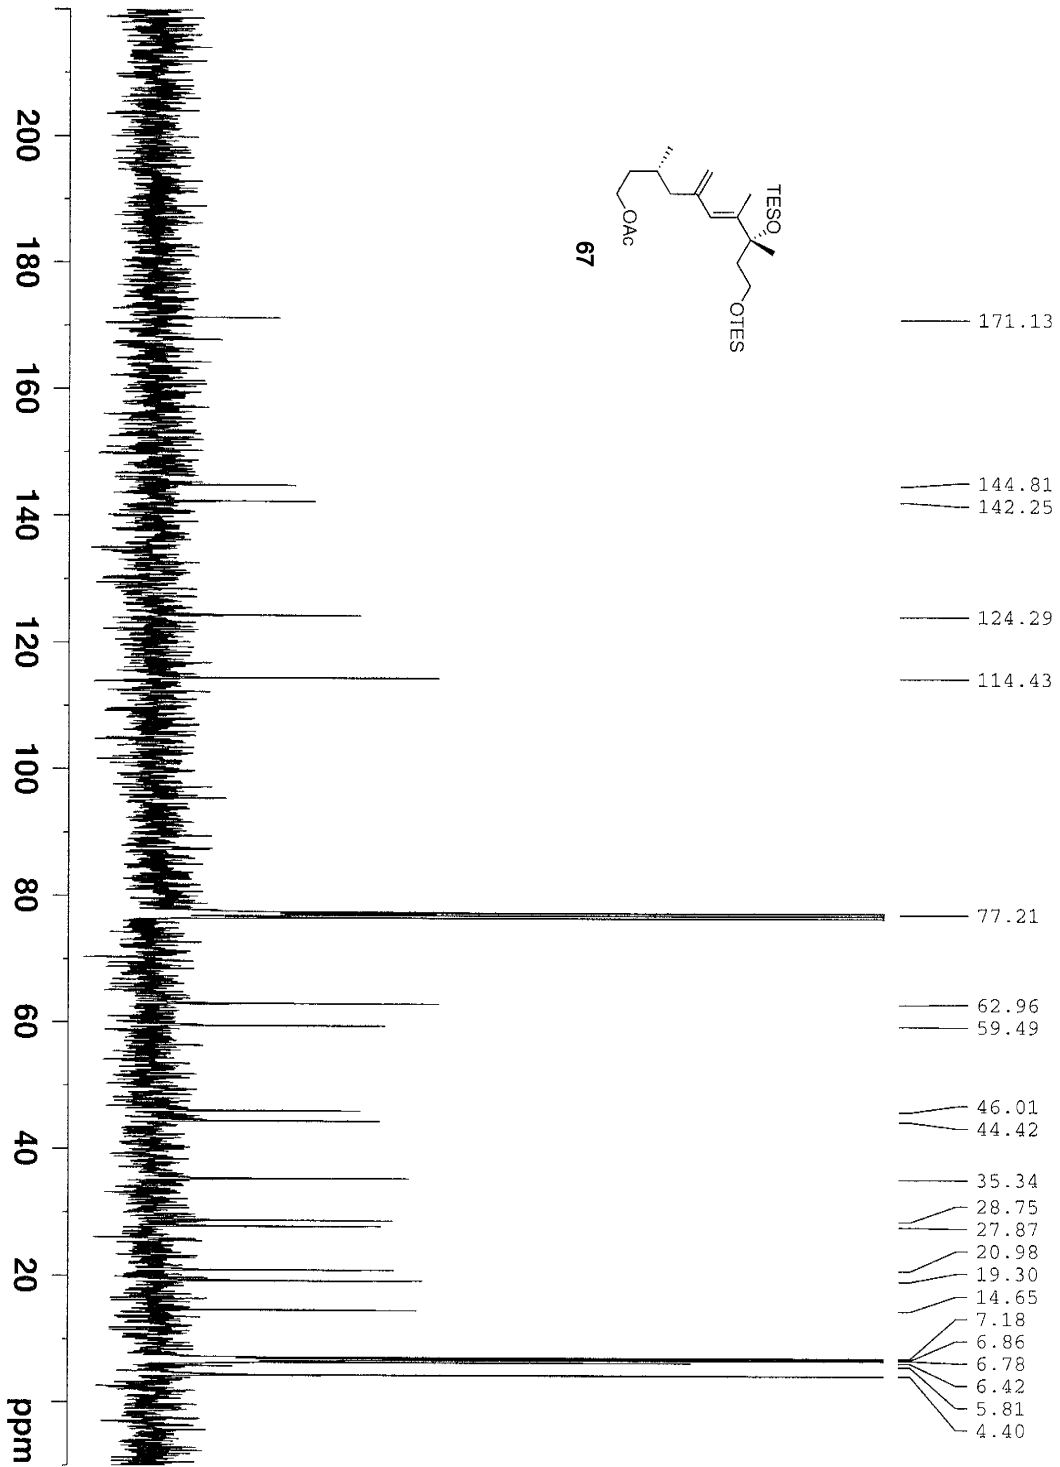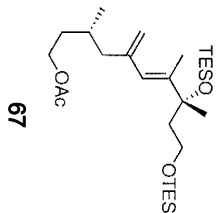

```

Current Data Parameters
NAME          7-76-2
EXPNO        1
PROCNO       1
DU           /n
C/SR          Liang

F2 - Acquisition Parameters
Date_        20080214
Time         15.30
INSTRUM     DFX300
PROBHD      1H/1
PULPROG     zgpg30
TD          65536
SOLVENT     CDCl3
NS          189
DS          4
SWH         19812.194 Hz
FIDRES     0.287360 Hz
AQ         1.7400308 sec
RG         9195.2
CW         26.550 us
DE         6.00 us
TE         298.2 K
D1         0.15000001 sec
d11        0.03000000 sec
DELTA      0.05000000 sec
TD0        1

===== CHANNEL f1 =====
NUC1        13C
P1         8.80 us
PL1        -3.00 dB
SFO1       75.4760905 MHz

===== CHANNEL f2 =====
CDDPRG2     waltz16
NUC2        1H
PCPD2       80.00 us
PL2         -3.00 dB
PL12        17.55 dB
PL13        17.55 dB
SFO2       300.1312005 MHz

F2 - Processing parameters
SI          32768
SF         75.4677490 MHz
WDW         EM
SSB         0
LB          3.00 Hz
GB          0
PC          1.40
  
```

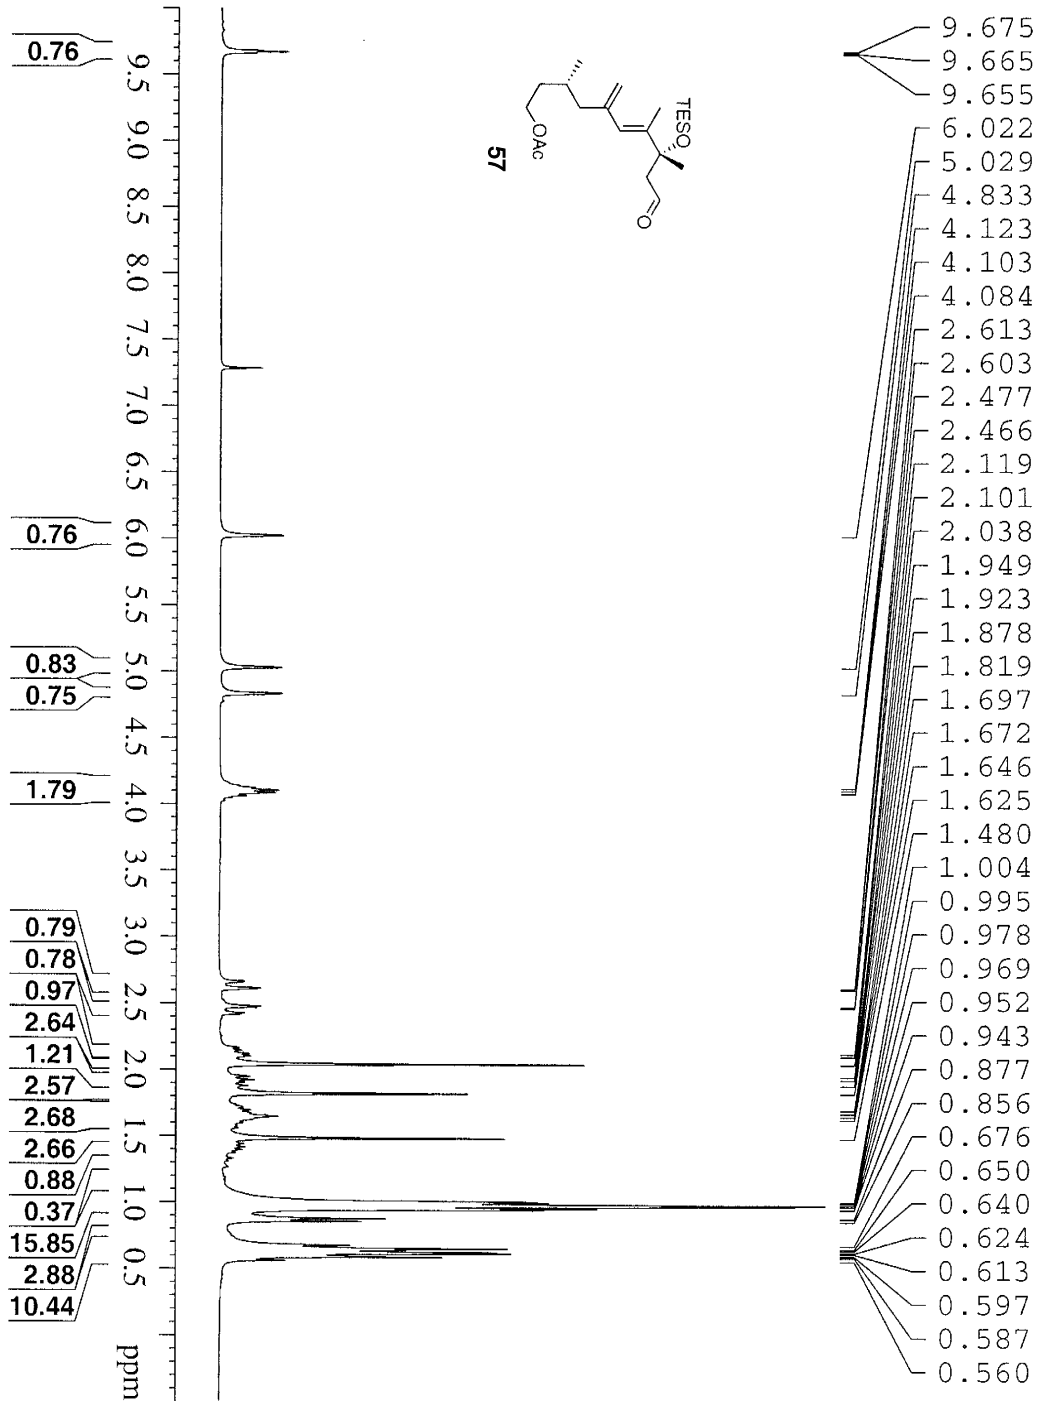

Current Data Parameters  
 EXPNO 1  
 PROCNO 1  
 F2 - Acquisition Parameters  
 Date\_ 20080216  
 Time 15:08  
 INSTRUM spect  
 PULPROG zgpg30  
 TD 32768  
 SOLVENT CDCl3  
 DS 2  
 SWH 4789.272 Hz  
 FIDRES 0.146157 Hz  
 AQ 3.4210291 sec  
 IZ1 104.420 usec  
 DE 6.90 usec  
 TE 299.2 K  
 D1 2.00000000 sec  
 TDO 1

\*\*\*\*\* CHANNEL f1 \*\*\*\*\*  
 NUC1 1H  
 P1 8.00 usec  
 PL 0.00 dB  
 SFO1 300.131009 MHz

F2 - Processing parameters  
 SI 32768  
 SF 300.131009 MHz  
 WDW EM  
 SSB 0  
 LB 0.30 Hz  
 GB 0  
 PC 1.00

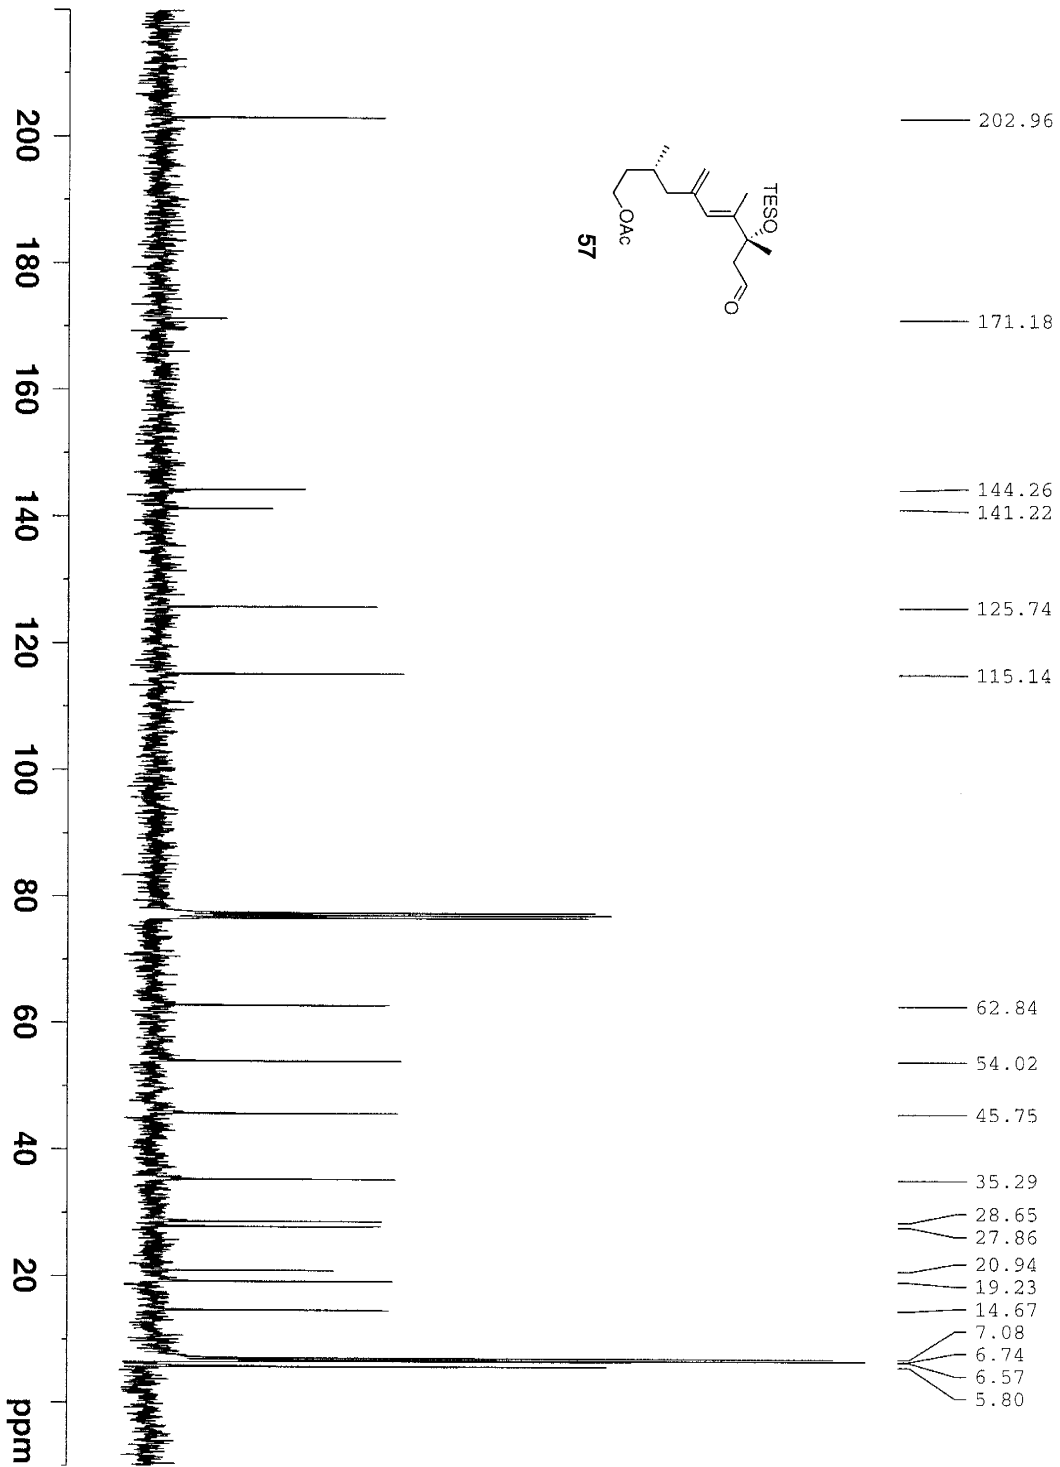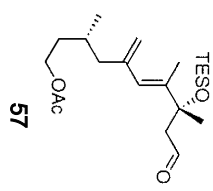

```

Current Data Parameters
NAME          7-31
EXPNO         1
PROCNO        1
DU             /n
CUSER
===== CHANNEL F1 =====
NUC1          13C
P1            8.80 us
P2            3.00 us
PULS          75.4760505 W
SFO1
===== CHANNEL F2 =====
COPPRPG2     waltz16
NUC2          1H
PCPD2        80.00 us
PL2          -3.00 dB
PL12         17.55 dB
PL13         17.55 dB
SFO2         300.312605 MHz
F2 - Processing Parameters
SI           32768
SF           75.4677490 MHz
WDW          EM
SSS          0
LB           3.00 Hz
GB           0
PC           1.40

F2 - Acquisition Parameters
Date_        20080216
Time         15.23
INSTRUM      DPX300
PROBHD       5 mm QNP 1H/1
PULPROG      zgpg30
TD            65536
SOLVENT      CDCl3
NS            188
DS            4
SWH           18922.343 Hz
FIDRES       0.261366 Hz
AQ            1.7460398 s
RG            9.95 2
DE            26.550 us
TE           298.2 K
D1            0.15000001 s
d11           0.03000000 s
DELTA        0.05000000 s
TDO          1
  
```









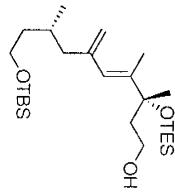

SI-22

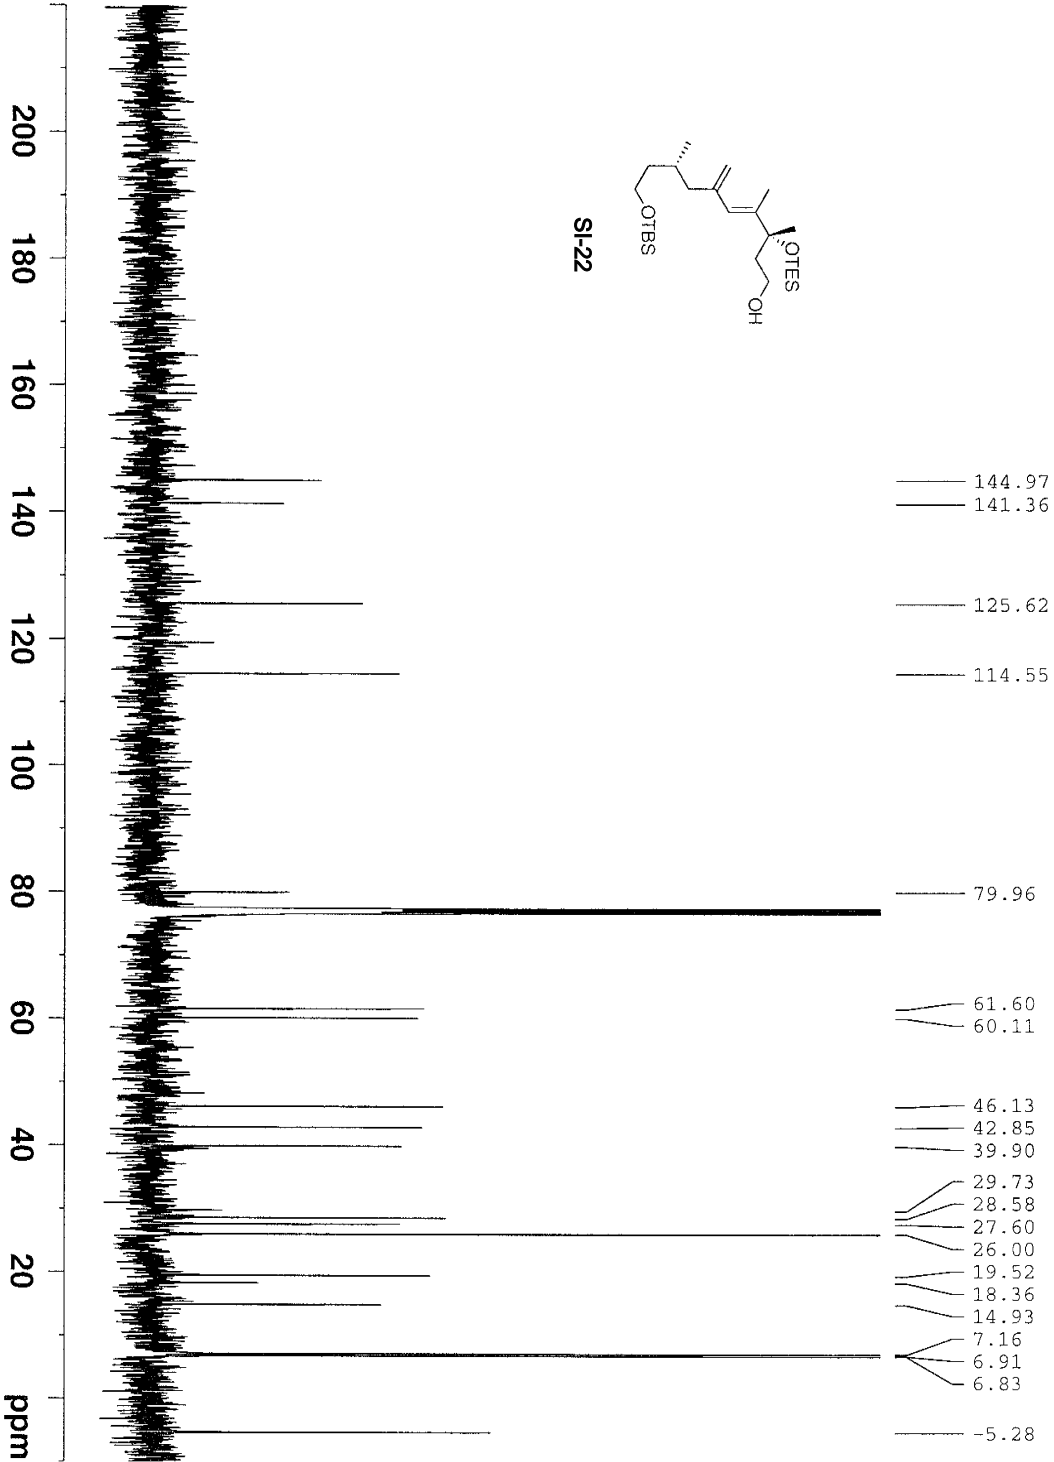

```

Current Data Parameters
NAME ampddj-1v-1510914
EXPNO 1
PROCNO 5
DU /c
USER L:ang

F2 - Acquisition Parameters
Date_ 20060914
Time 21.48
INSTRUM DPX400
PROBHD 5 mm BBO BB-1H
PULPROG zgpg30
TD 65536
SOLVENT 2450
DS 4
SS 2
SWH 25125.629 Hz
FIDRES 0.361387 Hz
AQ 1.3042164 sec
RG 6502
DW 19.900 usec
DE 6.00 usec
TE 298.2 K
D1 0.15000001 sec
d11 0.03000000 sec
DELTA 0.05000000 sec
TD0 1

===== CHANNEL f1 =====
NUC1 13C
P1 7.80 usec
PL1 -2.50 dB
SFO1 100.591691 MHz

===== CHANNEL f2 =====
CDDPRG2 waltz16
NUC2 1H
PCPD2 135.00 usec
PL2 17.40 dB
PL12 17.40 dB
PL13 17.40 dB
SFO2 400.0116000 MHz

F2 - Processing parameters
S- 32768
SF 100.5825950 MHz
WDW EM
SSB 0
LB 3.00 Hz
GB 0
PC 1.40
  
```

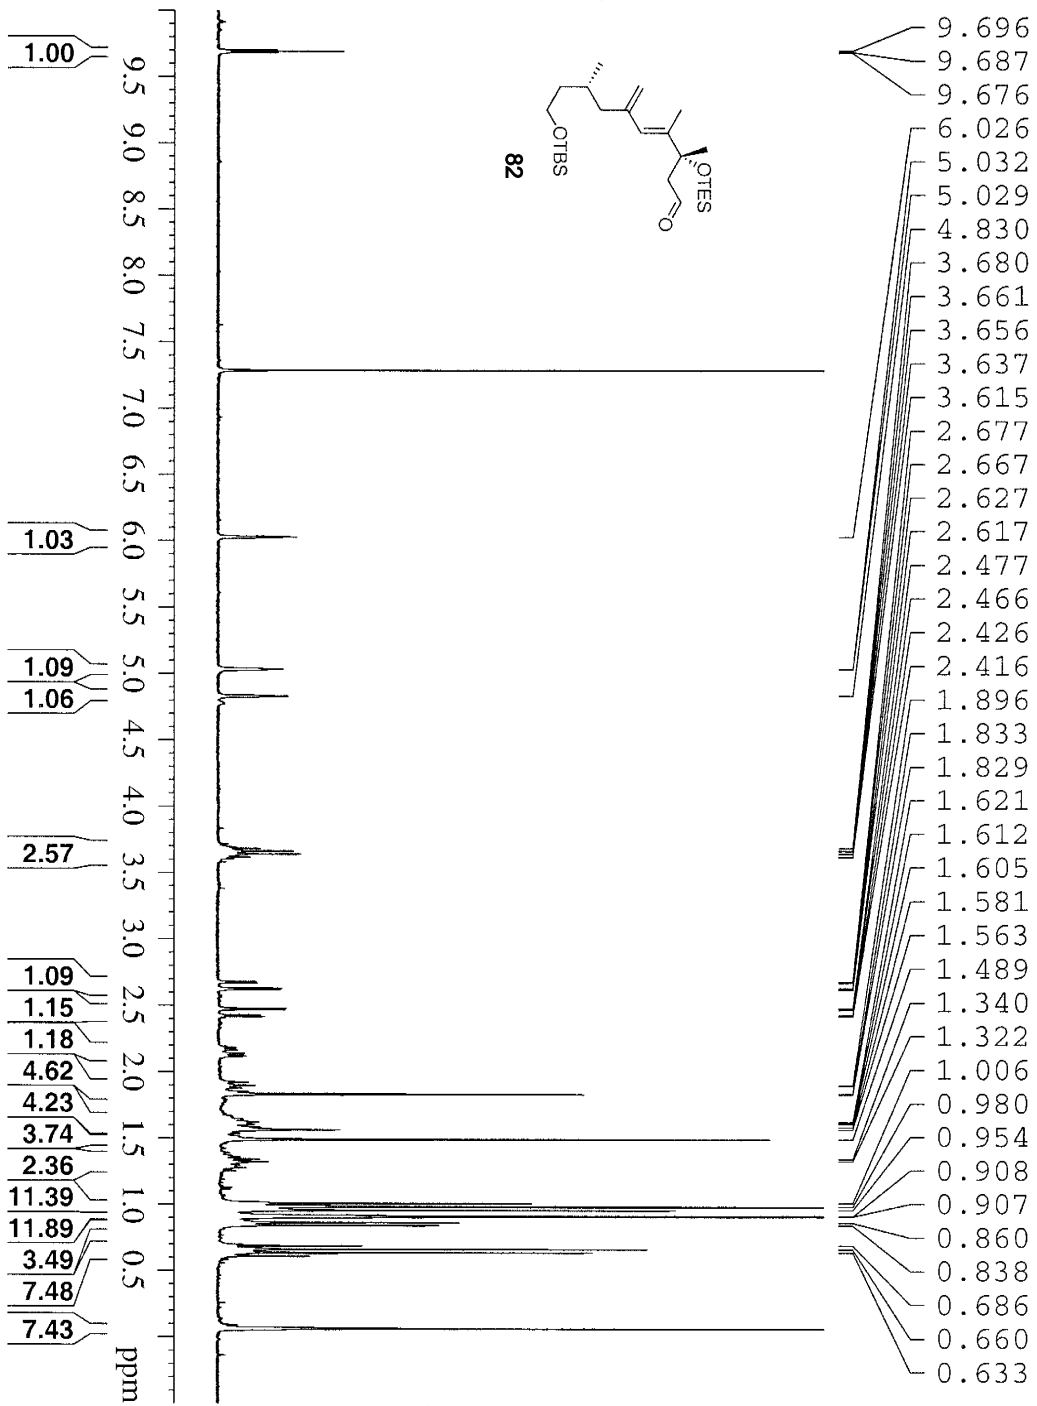

```

Current Data Parameters
NAME      emp02-19-14 (1)
EXNO      1
PROCNO    1
DS         /n
USER       Liang

F2 - Acquisition Parameters
Date_     20060915
Time      15.03
INSTRUM   DPX300
PROBHD    5 mm QNP
PULPROG   zgpg30
TD         65536
SOLVENT   CDCl3
NS         32
DS         2
SFO1       300.1321009 MHz
SFO2       75.2618250 MHz
FIDRES    0.146157 Hz
AQ         3.4210291 sec
RG         104.400 usec
DE         6.00 usec
TE         298.2 K
D1         2.00000000 sec
TD0        1

***** CHANNEL f1 *****
NUC1       1H
P1         9.00 usec
PL1        0.00 dB
SFO1       300.1321009 MHz

F2 - Processing parameters
SI         32768
SF         300.130000 MHz
WDW        EM
SSB        0
LB         0.00 Hz
GB         0
PC         1.00
  
```

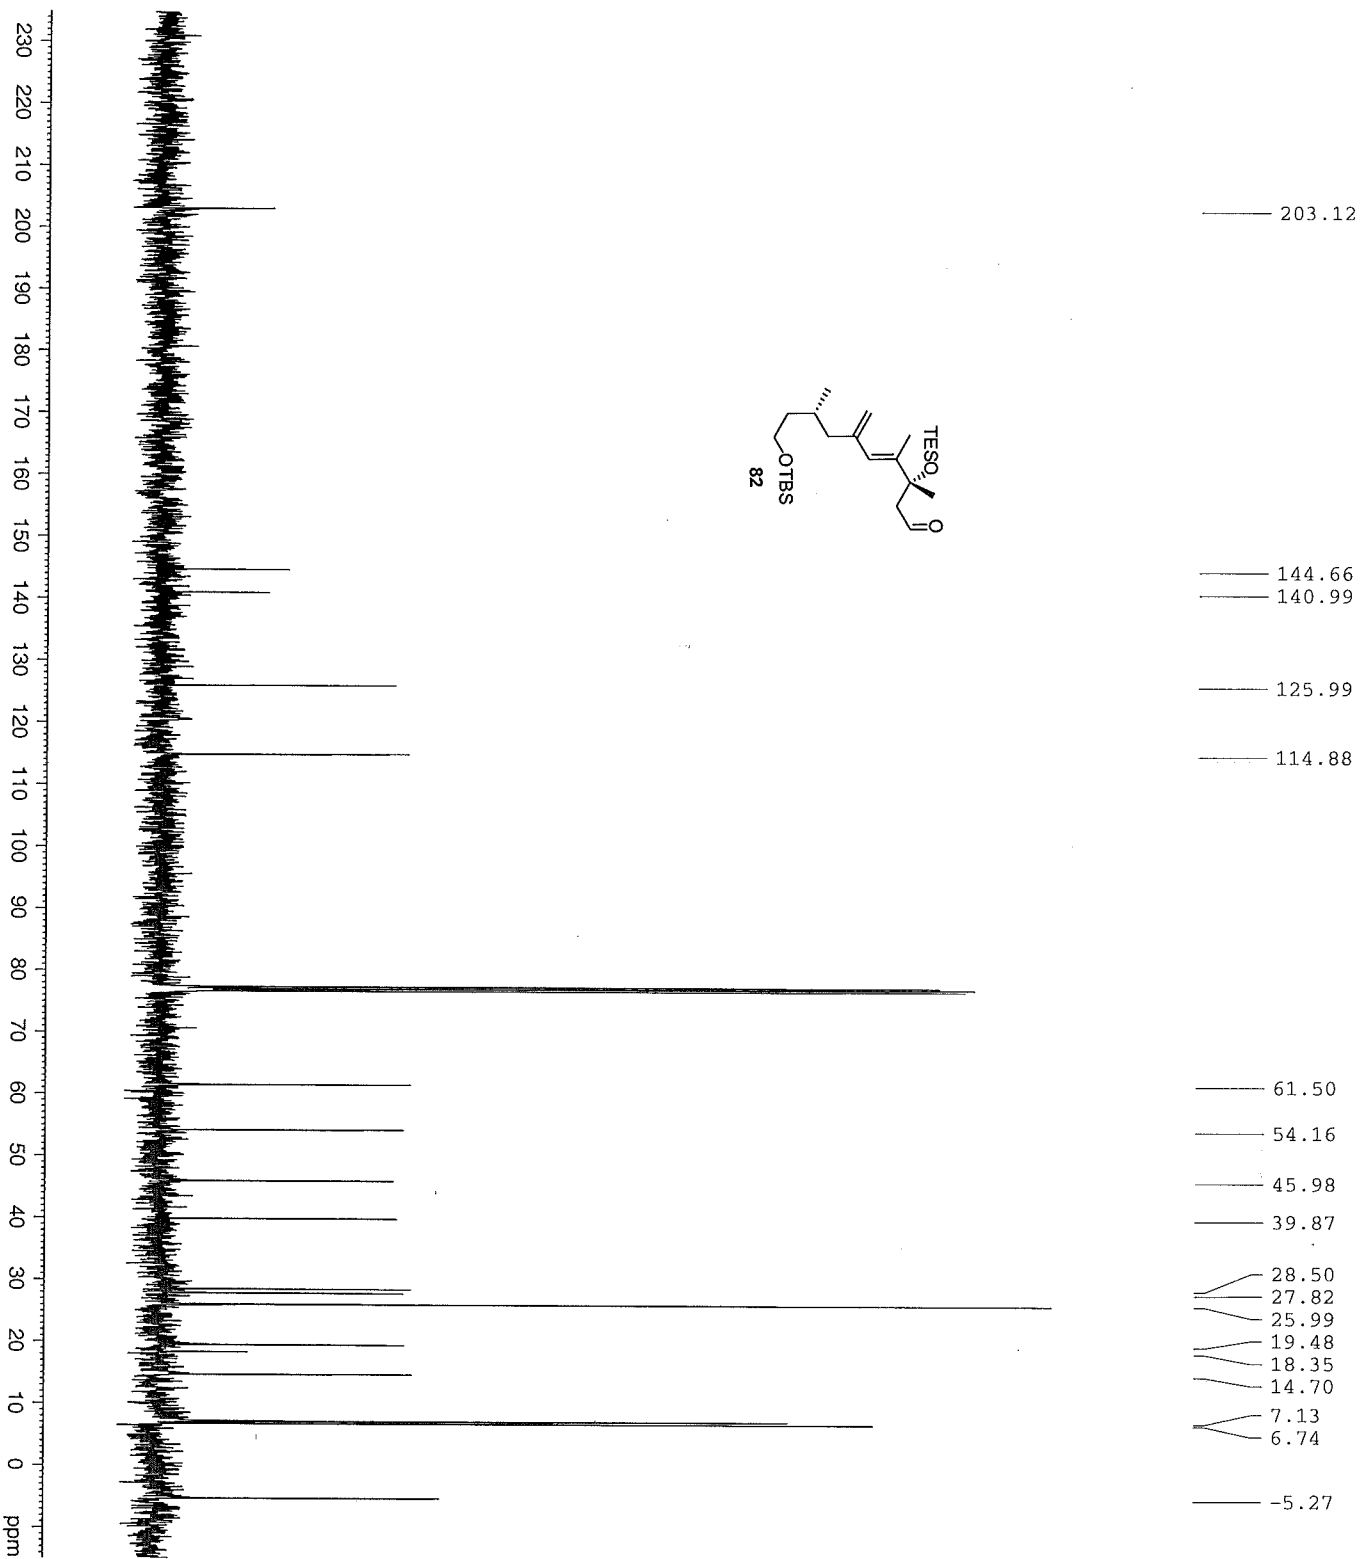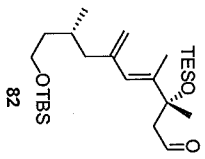

Current Data Parameters  
 NAME ampdd1-IV-14(091506)  
 EXPNO 3  
 PROCNO 1  
 DU /n  
 USER Liang

F2 - Acquisition Parameters  
 Date\_ 20060915  
 Time 17.28  
 INSTRUM DPX400  
 PROBHD 5 mm BBO BB-1H  
 PULPROG zgpg30  
 TD 65536  
 SOLVENT NS  
 NS 112  
 DS 4  
 SMH 25125.629 H2  
 FIDRES 0.383387 H2  
 AQ 1.3042164 sec  
 RG 4597.6  
 DW 19.900 usec  
 DE 6.00 usec  
 TE 298.2 K  
 D1 0.15000001 sec  
 d11 0.03000000 sec  
 DELTA 0.05000000 sec  
 TD0 1

==== CHANNEL F1 =====  
 NUC1 13C  
 P1 7.80 usec  
 PL1 -3.00 dB  
 SFO1 100.5936591 MHz

==== CHANNEL F2 =====  
 CPDPRG2 waltz16  
 NUC2 1H  
 PCPD2 135.00 usec  
 PL2 17.40 dB  
 PL12 17.40 dB  
 PL13 17.40 dB  
 SFO2 400.0116000 MHz

F2 - Processing parameters  
 SI 32768  
 SF 100.5825950 MHz  
 WDW EM  
 SSB 0  
 LB 3.00 Hz  
 GB 0  
 PC 1.40

SI-24

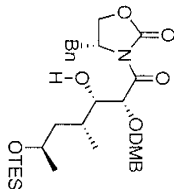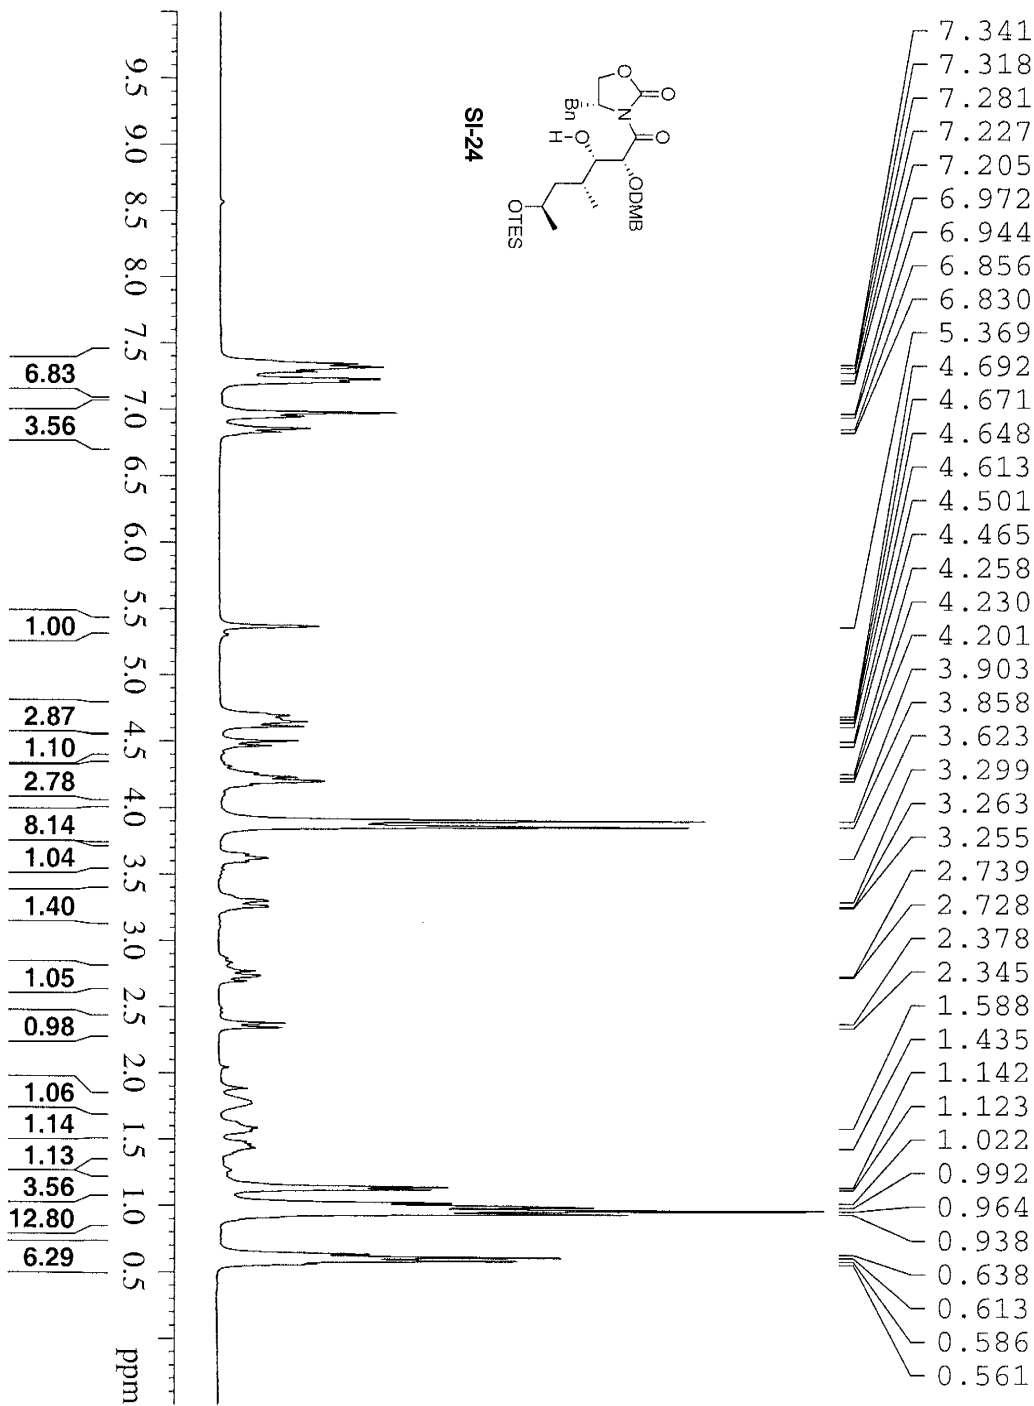

```

Current Data Parameters
EXPNO 4-31-2
PROCNO 1
DS 1
USER Liangs
F2 - Acquisition Parameters
Date_ 20061212
Time 16.45
INSTRUM dp430
PROBHD 5 mm QNP
PULPROG zgpg30
TD 2430
SOLVENT CDCl3
NS 15
DS 15
SWH 4789.272 Hz
FIDRES 0.146157 Hz
AQ 3.4219281 sec
RG 104.400 usac
DE 6.00 usac
TE 298.2 K
D1 2.00000000 sec
D11 1.00
D12 1.00
***** CHANNEL f1 *****
NUC1 1H
P1 9.00 usac
PL 0.00 dB
SFO1 300.1321009 MHz
F2 - Processing parameters
SI 32768
SF 300.130000 MHz
WDW CO
SSB 0
LB 0.00 Hz
GB 0
PC 1.00
  
```

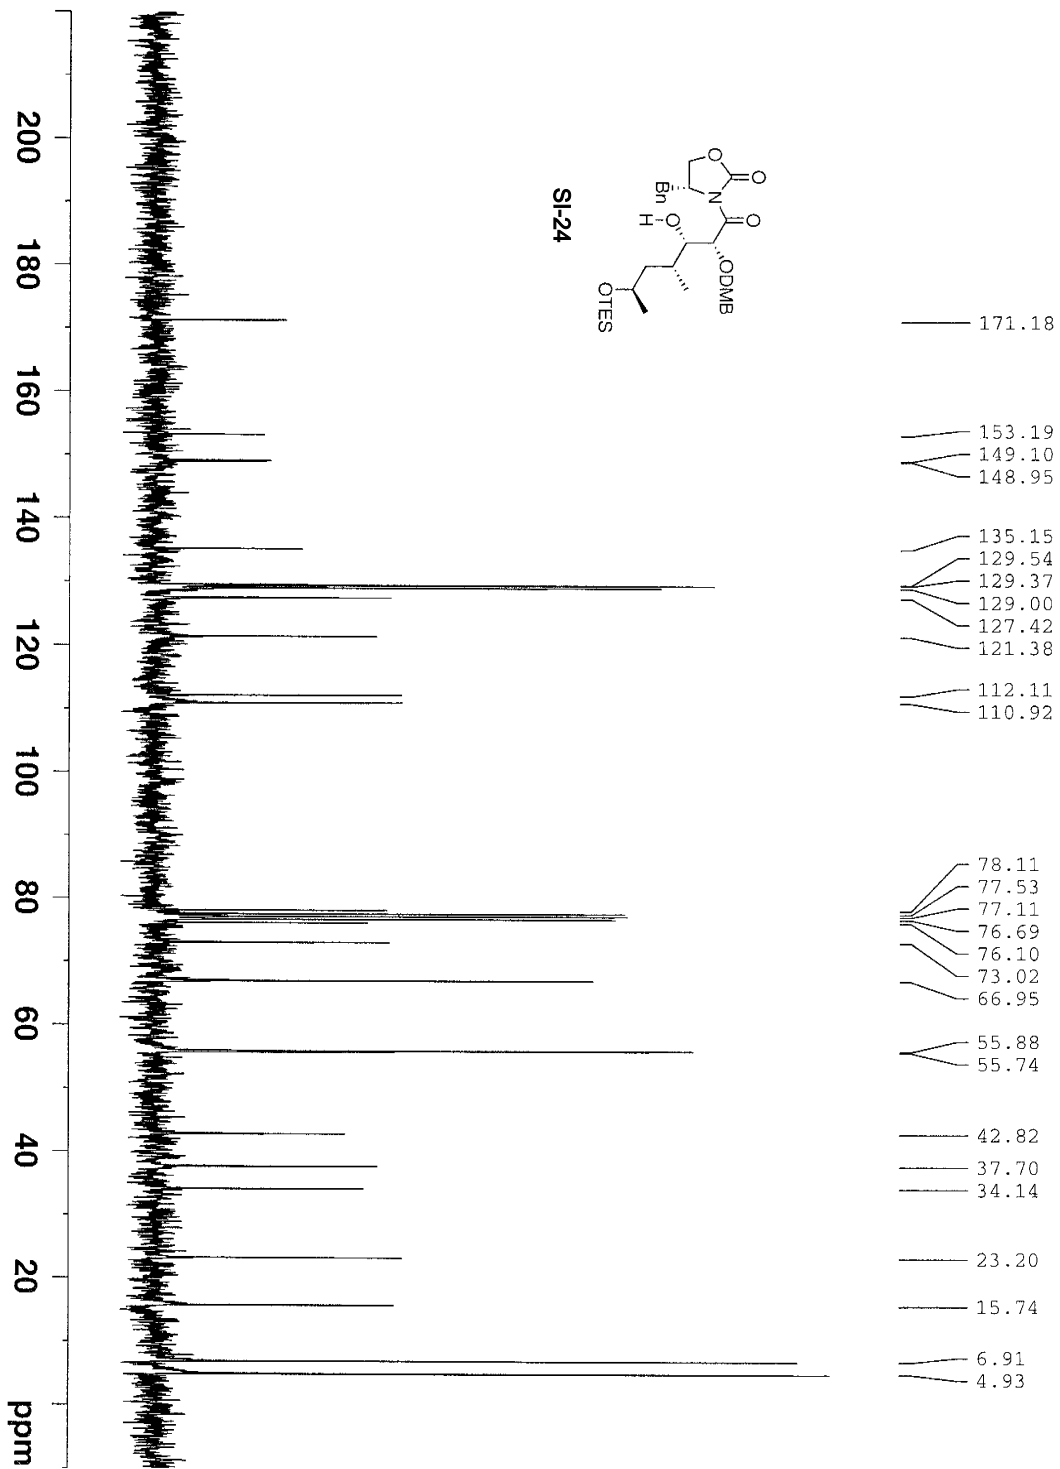

Current Data Parameters

NAME 451-2

EXPNO 4

PROCNO 1

F2 USER Liang

F2 - Acquisition Parameters

Date\_ 20061212

Time 17:03

INSTRUM DPM300

PROBHD 5 mm QNP 1H/1

PULPROG zgpg30

TD 65536

SOLVENT CDCl3

NS 38

DS 2

SWH 18832.303 Hz

FIDRES 0.287360 Hz

AQ 1.7400308 sec

RG 16384

DW 26.550 usec

DE 6.00 usec

TE 298.2 K

D1 0.15000001 sec

d11 0.03000000 sec

DELTA 0.05000000 sec

TDC 1

==== CHANNEL f1 =====

NUC1 13C

F1 8.80 usec

PL1 -3.00 dB

SFO1 75.476505 MHz

==== CHANNEL f2 =====

CPDPRG2 waltz16

NUC2 1H

PCPD2 80.40 usec

PL2 -3.00 dB

PL12 17.55 dB

PL13 17.55 dB

SFO2 300.1312005 MHz

F2 - Processing parameters

SI 32768

SF 75.4677490 MHz

WDW EM

SSB 0

LB 3.00 Hz

GB 0

PC 1.40



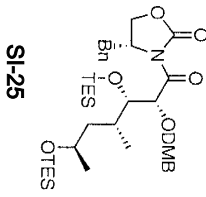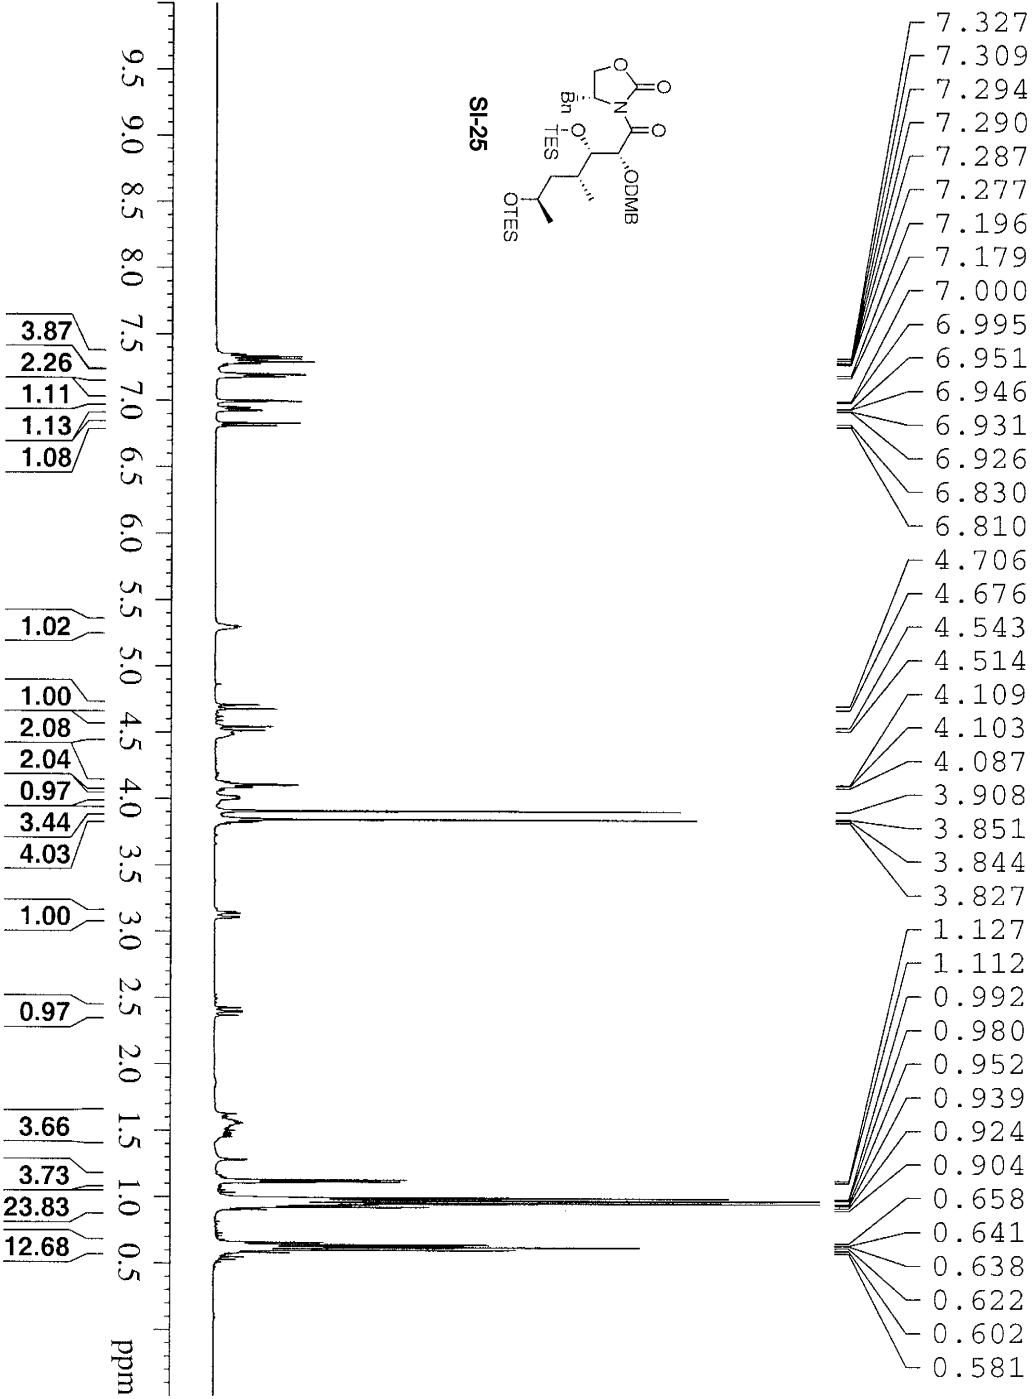

Nutrient Data Parameters  
 Name: SI-25  
 EXPNO: 1  
 PROCNO: 1  
 USR: /n  
 DS: 1  
 F2 - Acquisition Parameters  
 Date\_ Time: 20081125 19:46  
 INSTRUM: PRB400  
 NUC1: 13C  
 PULPROG: zgpg30  
 TD: 65536  
 SOLVENT: CDCl3  
 NS: 128  
 DS: 12  
 SWH: 6410.256 Hz  
 FIDRES: 0.199625 Hz  
 AQ: 2.559240 sec  
 RM: 0.000000  
 DM: 78.000 usec  
 DE: 6.00 usec  
 TE: 298.2 K  
 D1: 2.0000000 sec  
 TDO: 1

===== CHANNEL f1 =====  
 NUC1: 13C  
 P1: 14.70 usec  
 PL1: 0.00 dB  
 SFO1: 399.9926000 MHz

F2 - Processing parameters  
 SI: 32768  
 SF: 399.9926000 MHz  
 WIDW: 65536  
 SSB: 0  
 LB: 0.00 Hz  
 GB: 0  
 PC: 1.00

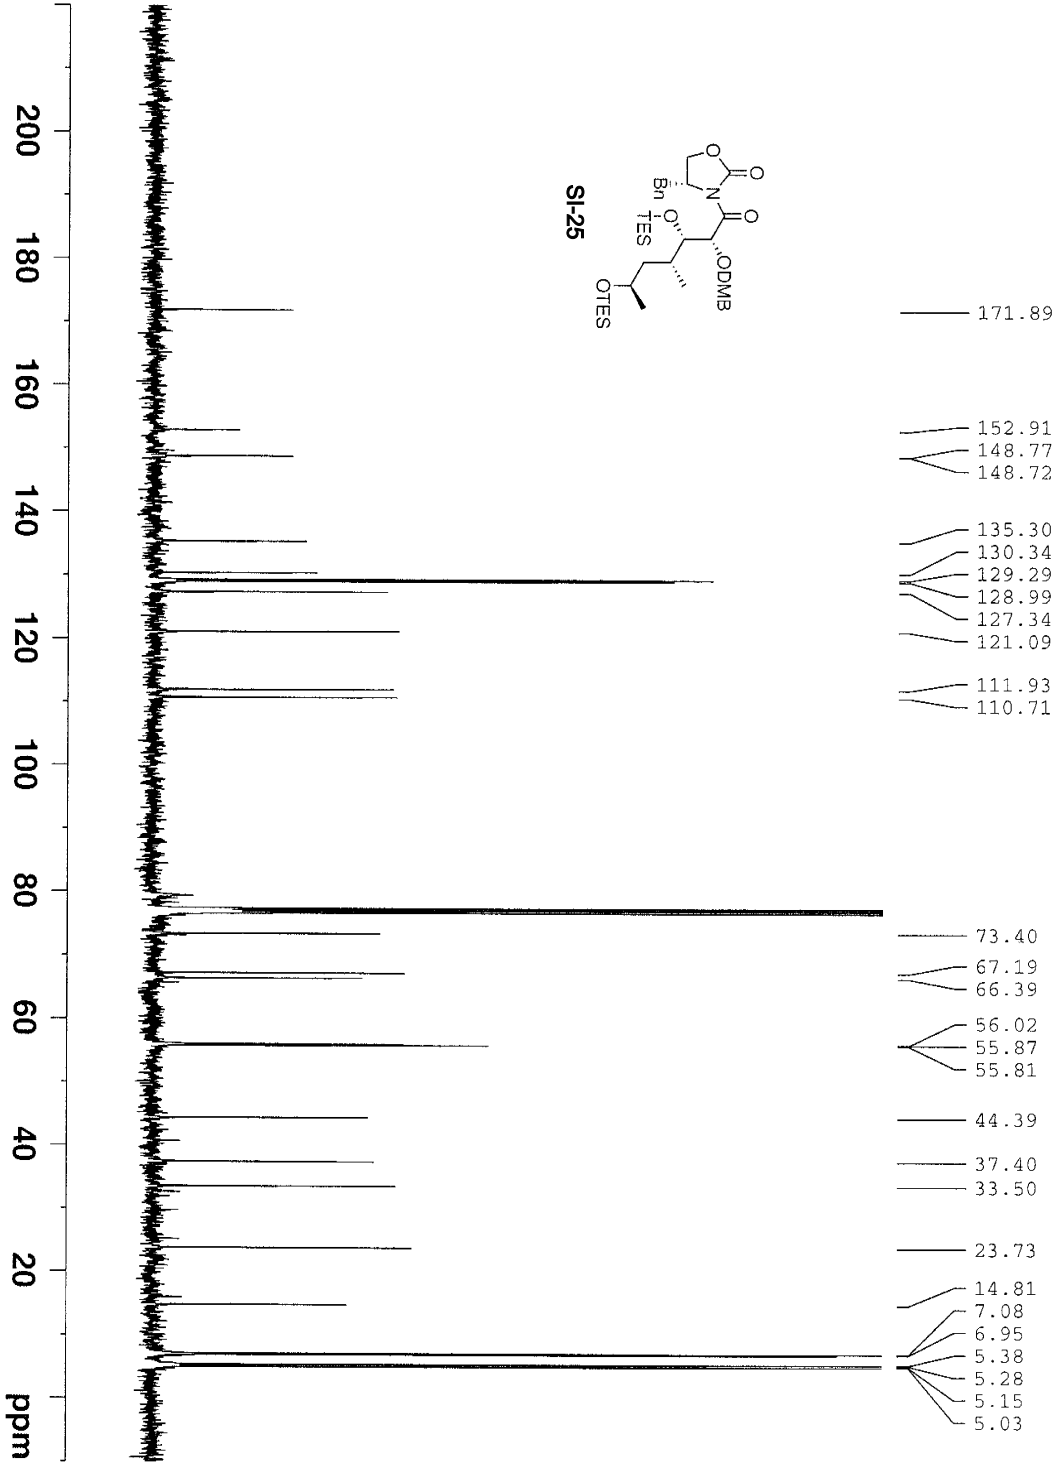

```

Current Data Parameters
NAME      DMB-aldol-RES_eti
EXPNO    3
PROCNO   1
F2       /n
USER
=====
F2 - Acquisition Parameters
Date_    20081125
Time     20.41
INSTRUM  dpx400
PROBHD   5 mm BBO BB-1H
PULPROG  zgpg30
SOLVENT  CDCL3
NS       1641
DS       4
SWH      25125.629 Hz
FIDRES   0.381387 Hz
AQ       1.3042164 s
RG       16384
DW       19.900 us
DE       6.00 us
TE       298.2 K
D1       0.15000001 s
d11      0.03000000 s
DELTA    0.05000000 s
TD0      1
=====
CHANNEL F1
NUC1      13C
P1        7.80 us
PL1       -7.80 dB
SFO1      100.5785700 MHz
=====
CHANNEL F2
CPDPRG2  waltz16
NUC2      1H
PC222    135.00 us
PL2      17.40 dB
PL12     17.40 dB
PL13     17.40 dB
SFO2      399.9515000 MHz
=====
F2 - Processing parameters
SI        32768
SF        100.5675680 MHz
WDW       EM
SSB       0
LB        3.00 Hz
GB        0
PC        1.40
  
```

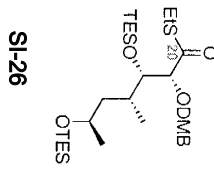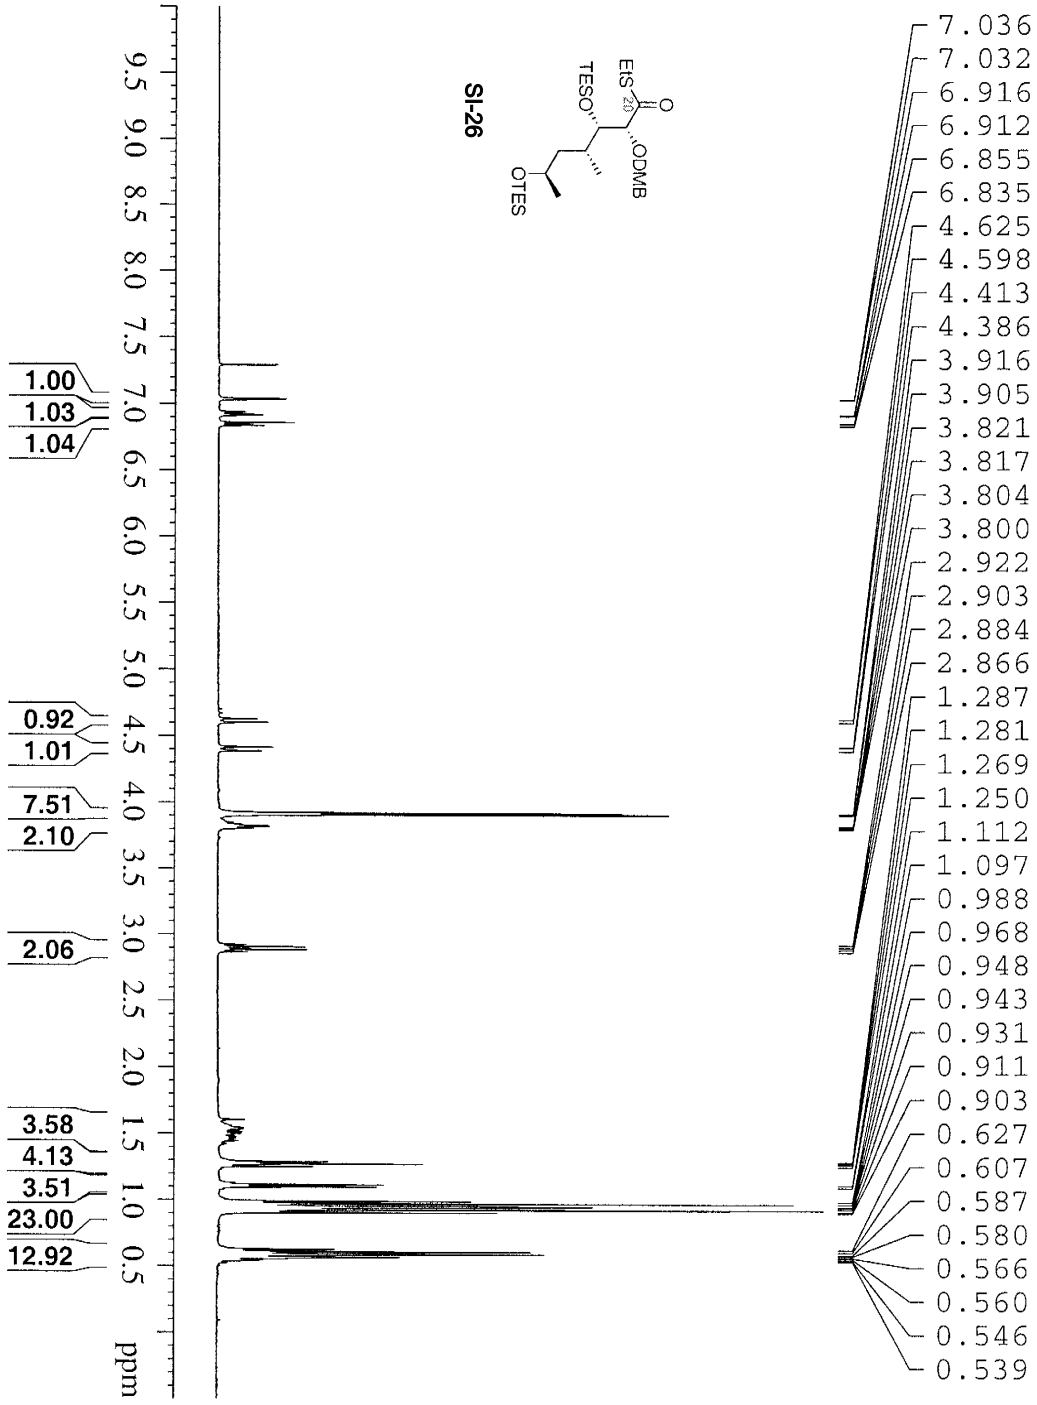

Current Data Parameters  
 EXPNO 1  
 PROCNO 1  
 F2 - Acquisition Parameters  
 Date\_ 20081125  
 Time 20.56  
 INSTRUM DPX400  
 PULPROG zgpg30  
 TD 65536  
 SOLVENT CDCl3  
 NS 1024  
 DS 4  
 SWH 6410.256 Hz  
 FIDRES 0.195625 Hz  
 AQ 2.5519540 sec  
 RG 768.00  
 DW 7.6200 usec  
 DE 6.00 usec  
 TE 298.2 K  
 D1 2.0000000 sec  
 TDO 1

\*\*\*\*\* CHANNEL f1 \*\*\*\*\*  
 NUCL1 1H  
 P1 14.70 usec  
 PL1 0.00 dB  
 SFO1 399.9528000 MHz

F2 - Processing parameters  
 SI 32768  
 SF 399.9500000 MHz  
 WDW 10  
 SSB 0  
 LB 0.00 Hz  
 GB 0  
 PC 1.30



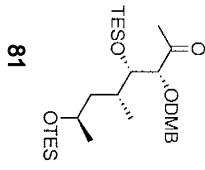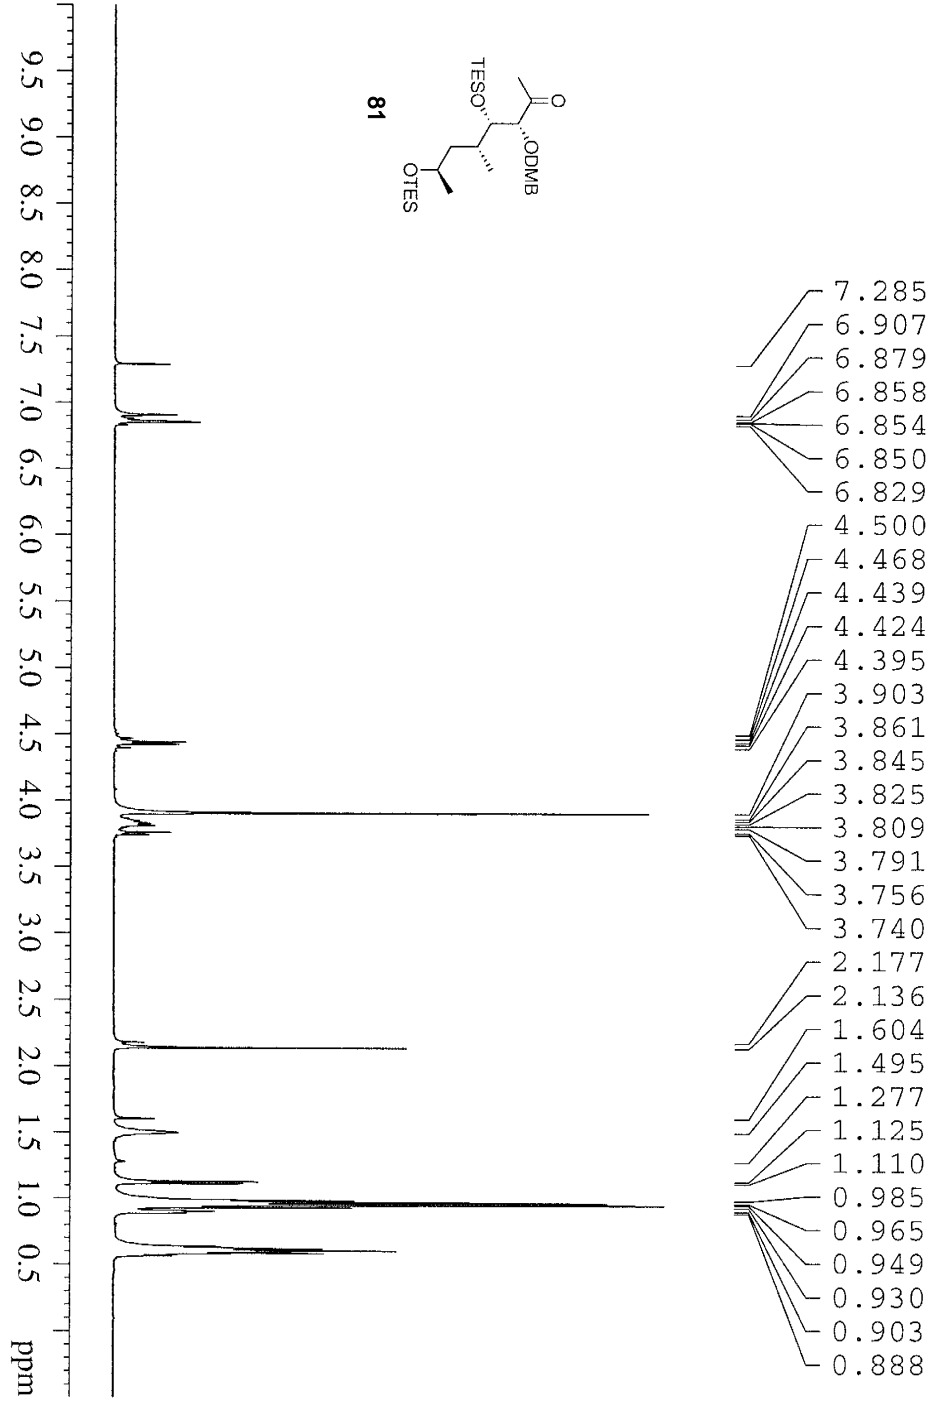

Current Data Parameters  
 Name: 2MP-methyl-1ecnone  
 EXPNO: 1  
 PROCNO: 1  
 DU: /n  
 USER: Liang

F2 - Acquisition Parameters  
 Date\_: 20081125  
 Time: 21.31  
 INSTRUM: zgpg30  
 PULPROG: zgpg30  
 TD: 32768  
 SOLOVENT: CDCl3  
 DS: 10  
 DE: 10  
 SSB: 0  
 Gain: 641C.256 Hz  
 FIDRES: 0.195625 Hz  
 AQ: 2.5519540 sec  
 SFO: 78.000 usec  
 DE: 5.00 usec  
 TE: 298.2 K  
 D1: 2.00000000 sec  
 :30

\*\*\*\*\* CHANNEL f1 \*\*\*\*\*  
 NUC1: 1H  
 P1: 14.70 usec  
 PL1: 0.00 dB  
 SFO1: 399.9928000 MHz

F2 - Processing parameters  
 SI: 32768  
 SF: 399.990000 MHz  
 WDW: pw  
 SSB: 0  
 LB: 3.00 Hz  
 GB: 0  
 PC: 1.40

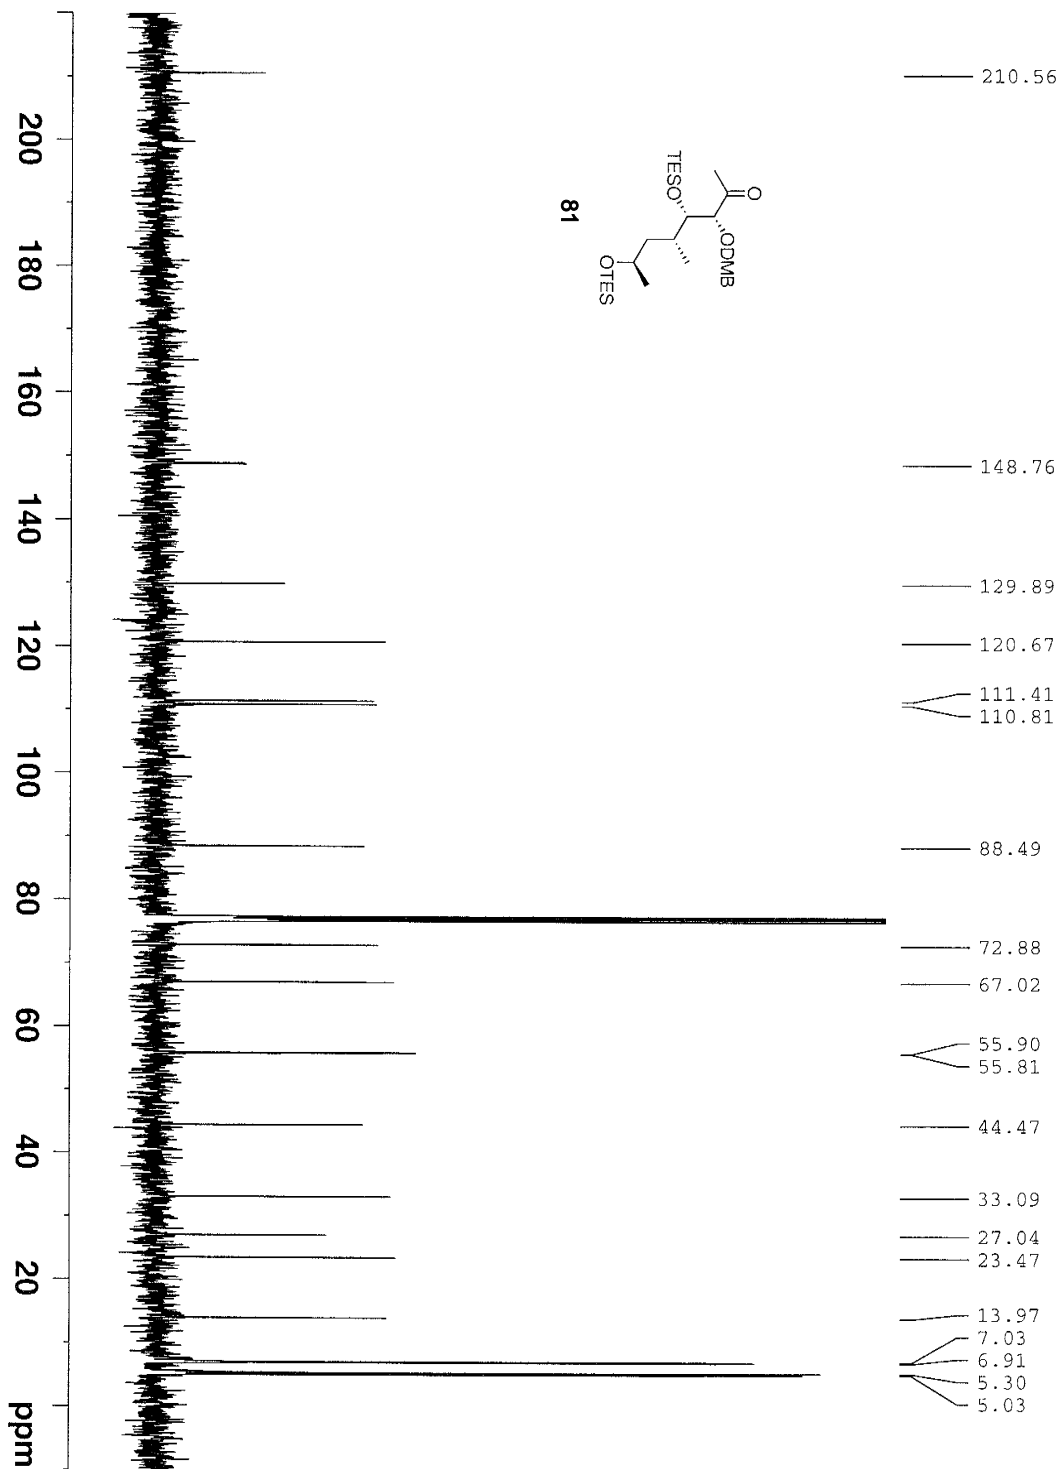

Current Data Parameters  
 NAME: DMS-methylketone  
 EXNO: 1  
 PROCNO: 3  
 DU: 1  
 CSBR: /n  
 Liang

F2 - Acquisition Parameters  
 Date\_: 20081125  
 Time: 21.45  
 INSTRUM: DFX400  
 PROBEHD: 5 mm BBO H3-1H  
 PULPROG: zgpg30  
 TD: 65536  
 SOLVENT: DMS  
 NS: 494  
 DS: 4  
 SWH: 23125.629 Hz  
 FIDRES: 0.1613387 Hz  
 AQ: 1.3042164 sec  
 RG: 5792.6  
 DW: 19.900 usec  
 DE: 6.00 usec  
 TE: 298.2 K  
 D1: 0.15000001 sec  
 g11: 0.03000000 sec  
 DELTA: 6.05000000 sec  
 TDO: 1

==== CHANNEL F1 =====  
 NUCL1: 13C  
 P1: 7.80 usec  
 PL1: -1.00 dB  
 SFO1: 100.5785700 MHz

==== CHANNEL F2 =====  
 CPDPRG2: waltz16  
 NUCL2: 1H  
 PCPD2: 135.00 usec  
 PL2: 17.40 dB  
 PL:2: 17.40 dB  
 PL:3: 17.40 dB  
 SFO2: 399.9510000 MHz

F2 - Processing parameters  
 SI: 32768  
 SF: 100.5675080 MHz  
 WDW: EM  
 SSB: 0  
 LB: 3.00 Hz  
 GB: 0  
 PC: 1.40



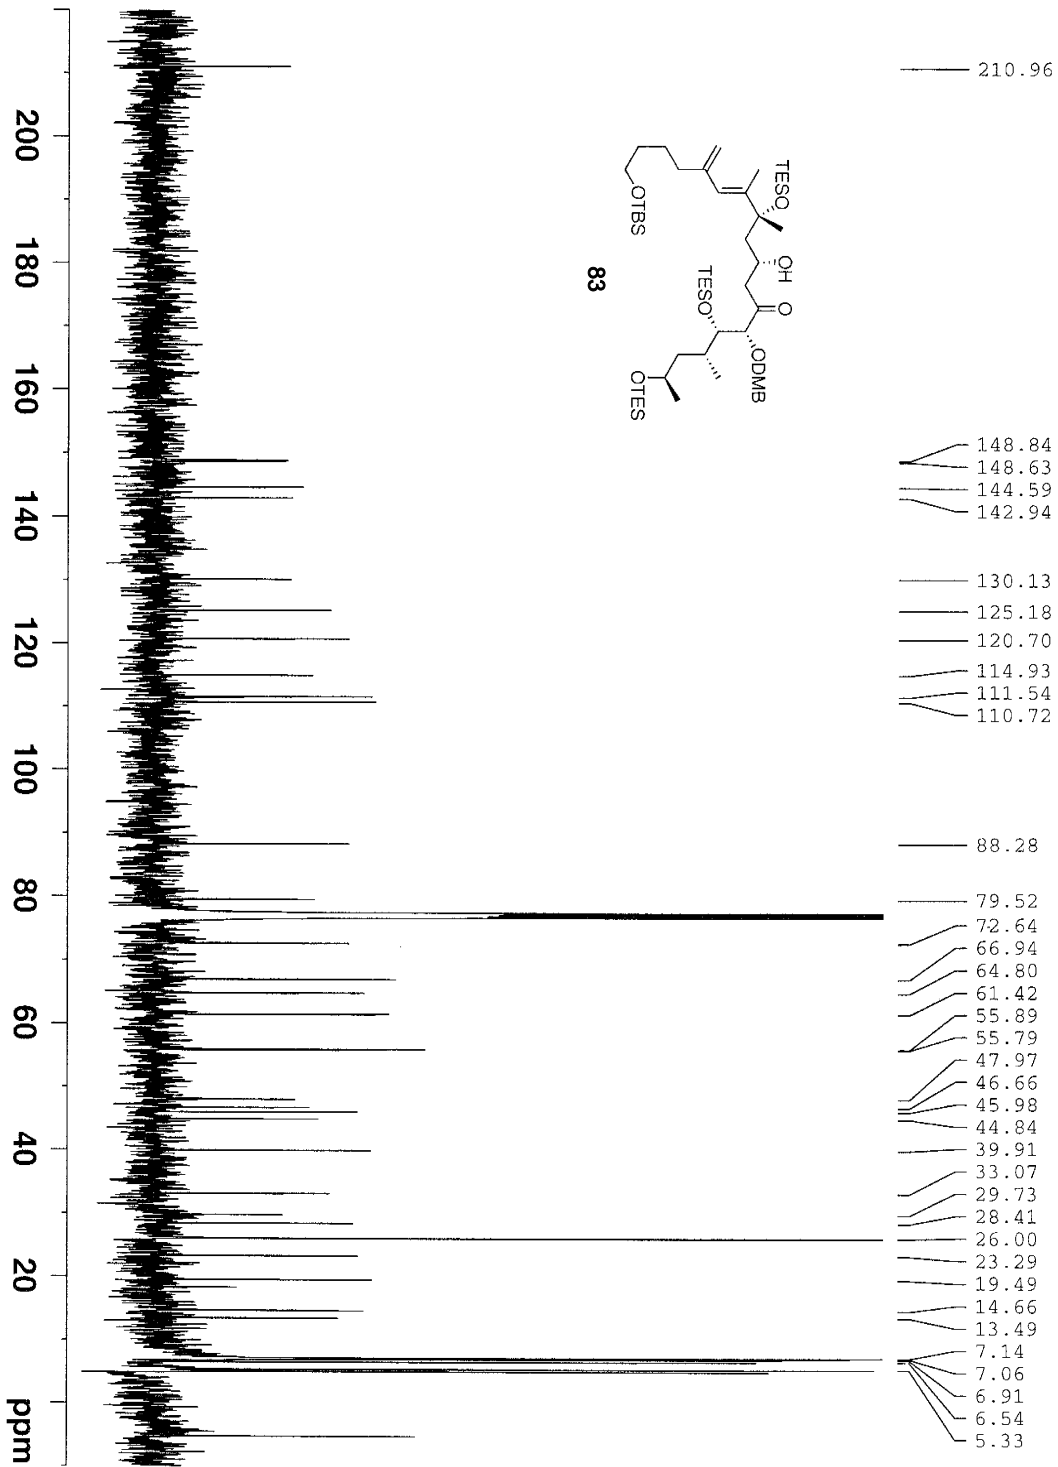

Current Data Parameters  
 NAME 434  
 EXPRNO 1  
 PROCNO 1  
 DT /C  
 USER Li:acg

F2 - Acquisition Parameters  
 Date\_ 20070112  
 Time 17.21  
 INSTRUM DFX400  
 PROBHD 5 mm BBO SB-1H  
 PULPROG zgpg30  
 TD 65536  
 SOLVENT  
 NS 2442  
 DS 4  
 SWH 26126.629 Hz  
 FIDRES 0.389382 Hz  
 AQ 1.3062164 sec  
 RG 18390.4  
 DW 19.900 usec  
 DE 6.00 usec  
 TE 298.2 K  
 D1 0.15000001 sec  
 d11 0.03000000 sec  
 DELTA 0.05000000 sec  
 \*D0 1

==== CHANNEL F1 =====  
 NUCL1 13C  
 P1 7.80 usec  
 PL1 3.00 dB  
 SFO1 100.5985951 MHz  
 ===== CHANNEL F2 =====  
 CPDPRG2 waltz16  
 NUC2 1H  
 ROPD2 135.00 usec  
 PL2 17.40 dB  
 PL12 17.40 dB  
 PL13 17.40 dB  
 SFO2 400.0116000 MHz

F2 - Processing Parameters  
 SI 32768  
 SF 100.5825950 MHz  
 WDM EM  
 SSB 0  
 LB 3.00 Hz  
 GB 0  
 PC 1.40



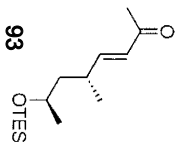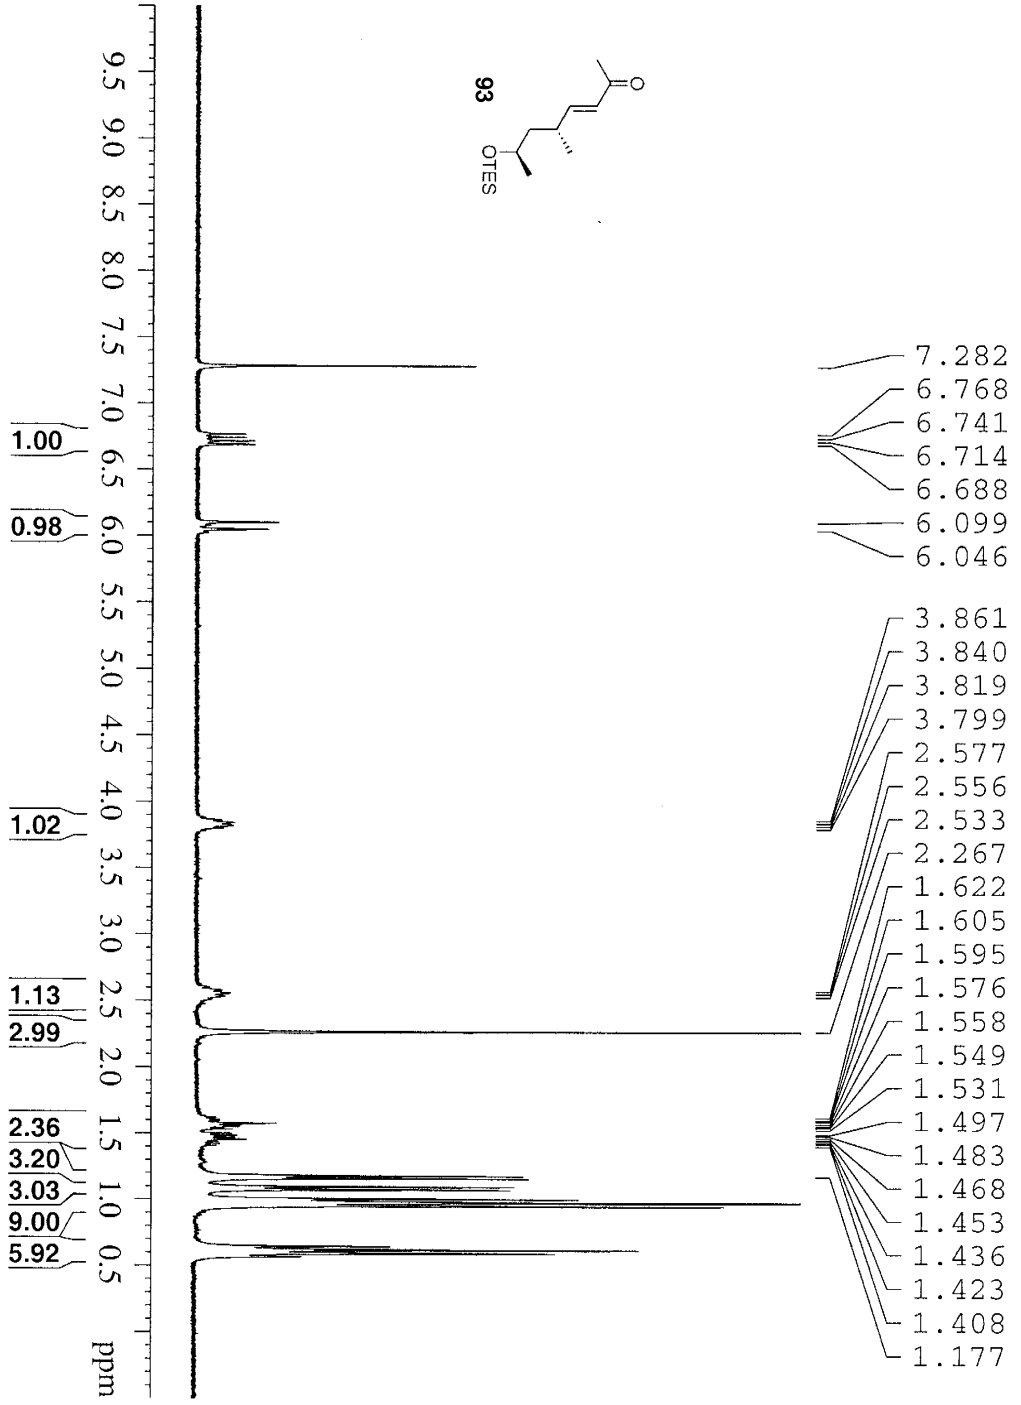

Current Data Parameters  
 EXPNO 3  
 PROCNO 1  
 DU 1  
 USER /n  
 Liang

F2 - Acquisition Parameters  
 Date\_ 20070222  
 Time 14.37  
 INSTRUM D24300  
 PULPROG zg30  
 TD 32768  
 SOLVENT CMC13  
 NS 11  
 DS 1  
 SWH 4789.272 Hz  
 FIDRES 0.146157 Hz  
 AQ 3.4219291 sec  
 DE 104.400 usec  
 TE 298.2 K  
 D1 2.00000000 sec  
 TDO 1

\*\*\*\*\* CHANNEL f1 \*\*\*\*\*  
 NUCL1 1H  
 P1 5.00 usec  
 PL 0.00 dB  
 SFO1 300.1321009 MHz

F2 - Processing parameters  
 SI 32768  
 SF 300.1300000 MHz  
 WDW no  
 SSB 0  
 LB 0.00 Hz  
 GB 0  
 PC 1.00

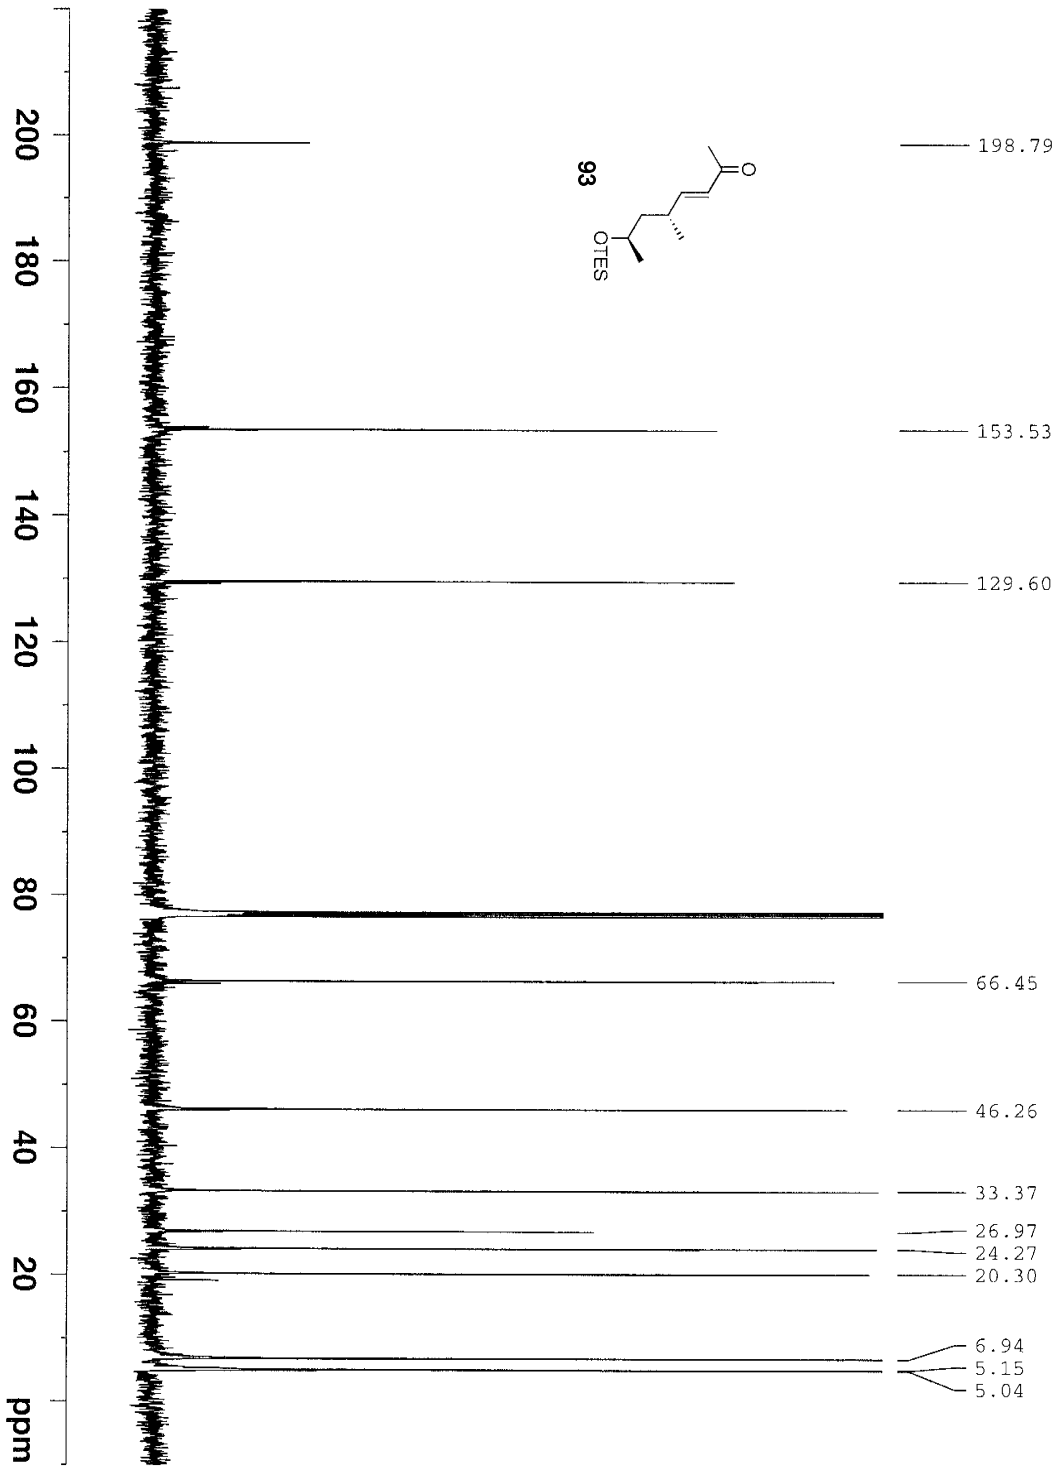

Current Data Parameters

|        |        |
|--------|--------|
| NAME   | 5-3472 |
| EXPNO  | 3      |
| PROCNO | 1      |
| DI     | 1/n    |
| USER   | Liang  |

F2 - Acquisition Parameters

|         |                |
|---------|----------------|
| Date_   | 20070417       |
| Time    | 16.34          |
| INSTRUM | DPX400         |
| PROBHD  | 5 mm BBO BB-1H |
| PULPROG | zgpg30         |
| TD      | 65536          |
| SOLVENT | CDCl3          |
| NS      | 1184           |
| DS      | 1              |
| SWH     | 25125.629 Hz   |
| F2      | 132.9123 Hz    |
| NUC2    | 13C            |
| RG      | 1.3042164 SK   |
| RO      | 4597.6         |
| LB      | 19.900 us      |
| DE      | 6.00 us        |
| TE      | 298.2 K        |
| TD      | 0.15000001 sec |
| DI1     | 0.03000000 sec |
| DELTA   | 0.05000000 sec |
| TD0     | 1              |

==== CHANNEL f1 =====

|      |                 |
|------|-----------------|
| NUC1 | 13C             |
| P1   | 7.88 us         |
| F1   | -3.09 GHz       |
| SFO1 | 100.6259591 MHz |

==== CHANNEL f2 =====

|          |                 |
|----------|-----------------|
| CAPPROG2 | waltz16         |
| NUC2     | 1H              |
| PCPD2    | 135.00 us       |
| PL2      | 17.40 dB        |
| PL12     | 17.40 dB        |
| PL13     | 17.40 dB        |
| SFO2     | 400.0116000 MHz |

F2 - Processing parameters

|     |                 |
|-----|-----------------|
| SI  | 32768           |
| SF  | 100.6259590 MHz |
| WDW | EM              |
| SSB | 0               |
| LB  | 3.00 Hz         |
| GB  | 0               |
| PC  | 1.40            |

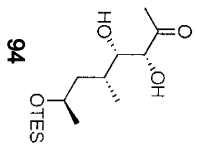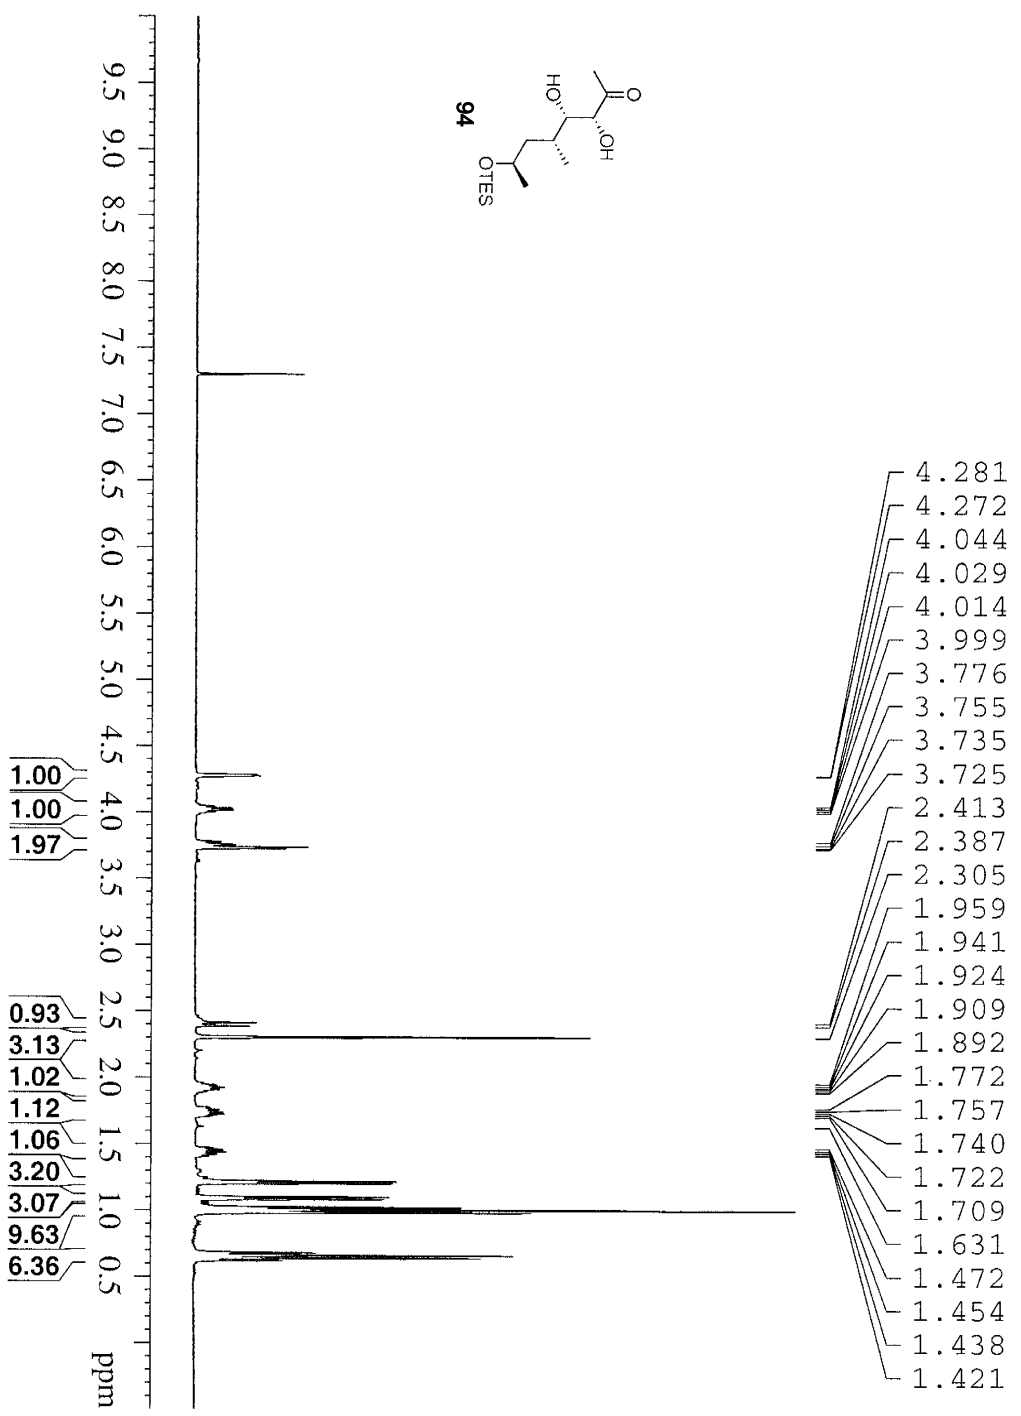

Current Data Parameters  
 EXPNO 5-3  
 PROCNO 1  
 DU /h  
 USER Liang

F2 - Acquisition Parameters  
 Date\_ 20070419  
 Time 21.48  
 INSTRUM DSI400  
 PULPROG zgpg30  
 TD 32768  
 SOLVENT CDCl3  
 NS 32  
 DS 2  
 SWH 6410.295 Hz  
 FIDRES 0.195625 Hz  
 AQ 2.3559540 sec  
 SFO1 400.0128001 MHz  
 DE 78.401 usec  
 TE 298.2 K  
 D1 2.00000000 sec  
 TDO 1

\*\*\*\*\* CHANNEL f1 \*\*\*\*\*  
 NUC1 1H  
 P1 14.70 usec  
 SFO1 400.0128001 MHz

F2 - Processing parameters  
 SI 32768  
 SF 400.0100000 MHz  
 WDW DO  
 SSB 0  
 LA 0.00 Hz  
 LB 0  
 PC 1.00

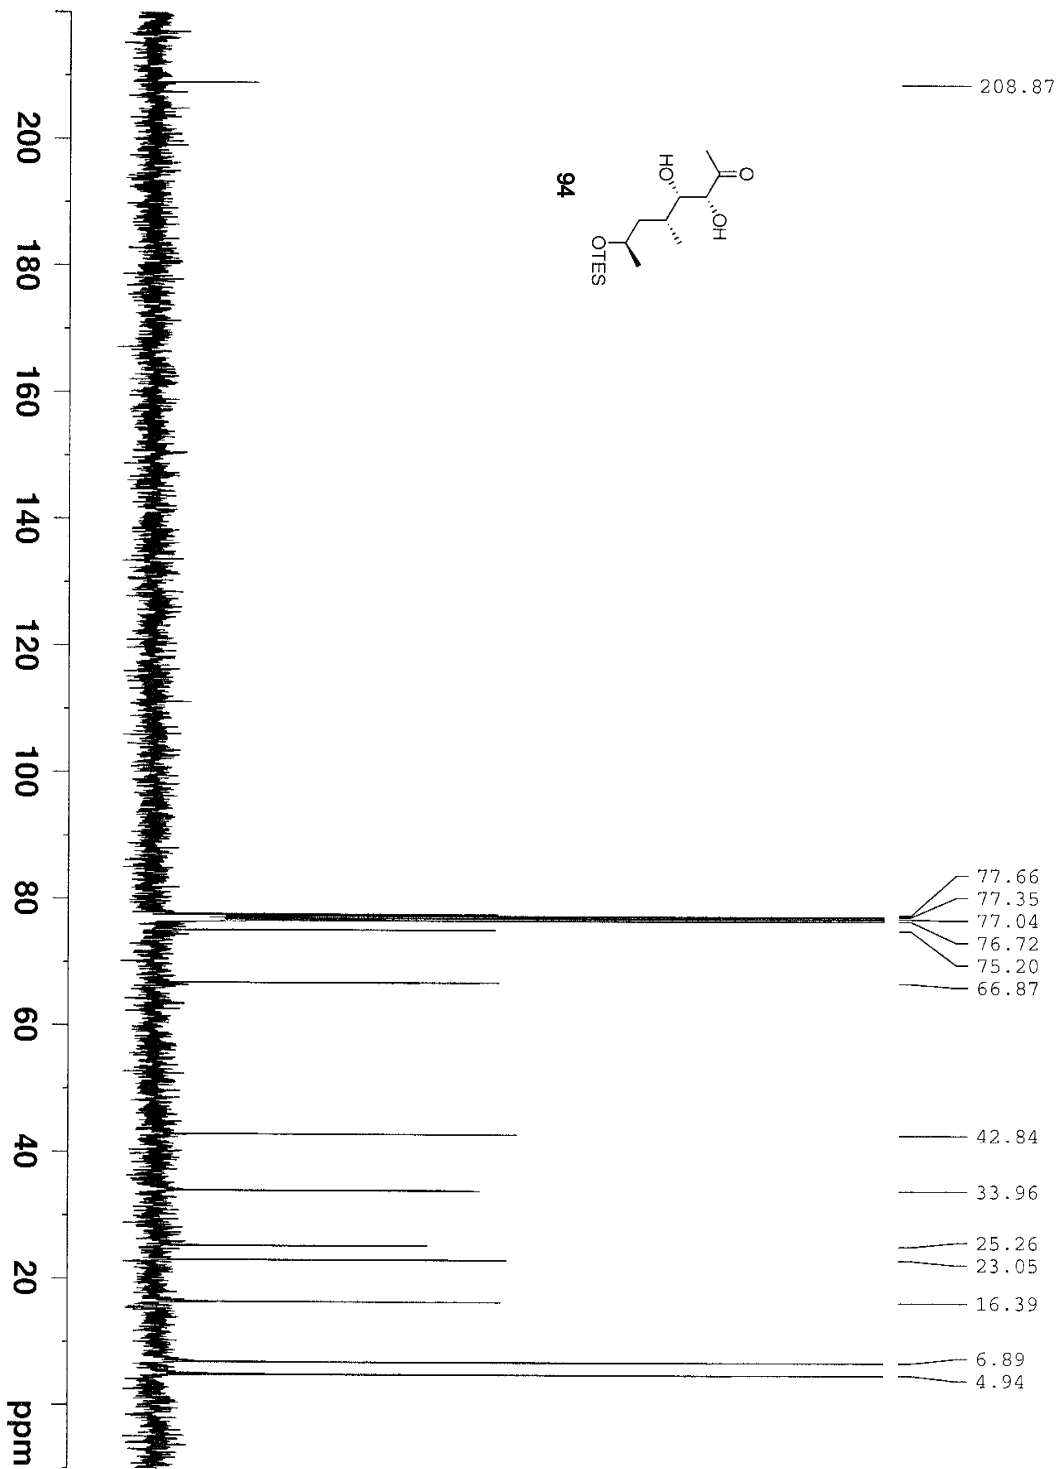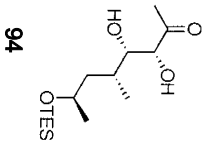

208.87

77.66  
77.35  
77.04  
76.72  
75.20  
66.87

42.84  
33.96  
25.26  
23.05  
16.39

6.89  
4.94

```

Current Data Parameters
NAME          5-37
EXPNO         1
PROCNO       1
F2           /n
USER
===== CHANNEL F1 =====
NUC1          13C
F2            7.80 us
PC1           3.00 us
SFO1         100.5936991 MHz
===== CHANNEL F2 =====
CPDPRG2      waltz16
NMIC2        135.00 us
PCPD2        17.46 us
PL12         17.46 us
PL13         17.46 us
SFO2         400.0116000 MHz
F2 - Processing parameters
SI           32768
SF          100.5825950 MHz
WDW          EM
SSB          0
LB           3.00 Hz
GB           0
PC           1.40
===== Acquisition Parameters =====
Date_        20070419
Time         22.24
INSTRUM     DPX400
PROBHD      5 mm BBO BB-1H
PULPROG     zgpg30
TD           65536
SOLVENT     CDCl3
NS           342
DS           4
SWH          25126.629 Hz
FIDRES       0.181187 Hz
AQ           1.3042164 sec
RG           31585.2
DE           19.900 us
TE           298.2 K
D1           C.15000001 sec
DELTA       C.03000000 sec
TDO         1
  
```

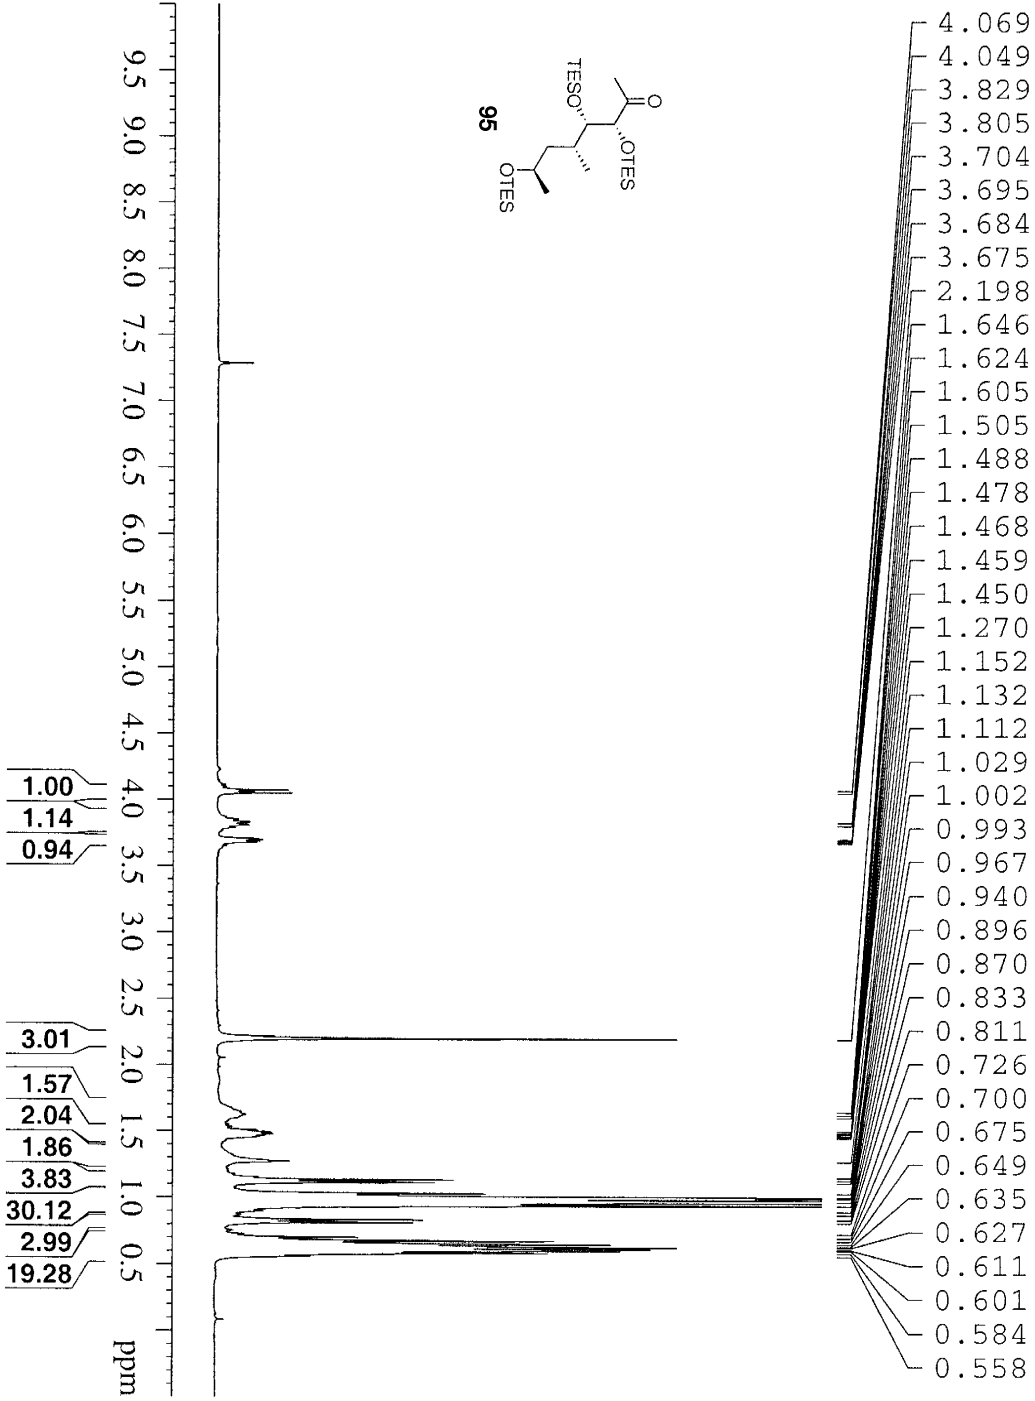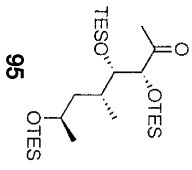

```

Current Data Parameters
NAME          5-37-2
EXPNO        5
PROCNO       1
F2           /h
SOLVENT      2:anis
=====
F2 - Acquisition Parameters
Date_         20070425
Time         15:34
INSTRUM      DSI-300
PROBHD       5 mm QNP 1H/1
PULPROG      zg30
TD           32768
SOLVENT      CDCl3
NS           1
DS           2
SFO1         4789.272 Hz
FIDRES       0.146157 Hz
AQ           3.9210291 sec
RG           409.5
DE           1.04400 usec
TE           298.2 K
TD0          2.00000000 sec
===== CHANNEL f1 =====
NUC1         13
P1           9.10 usec
PL1         -1.00 dB
SFO1        300.1321009 MHz
=====
F2 - Processing parameters
SI          300.1320000 MHz
WDW         wE
SSB         0
GB          0.00 Hz
PC          1.00
  
```





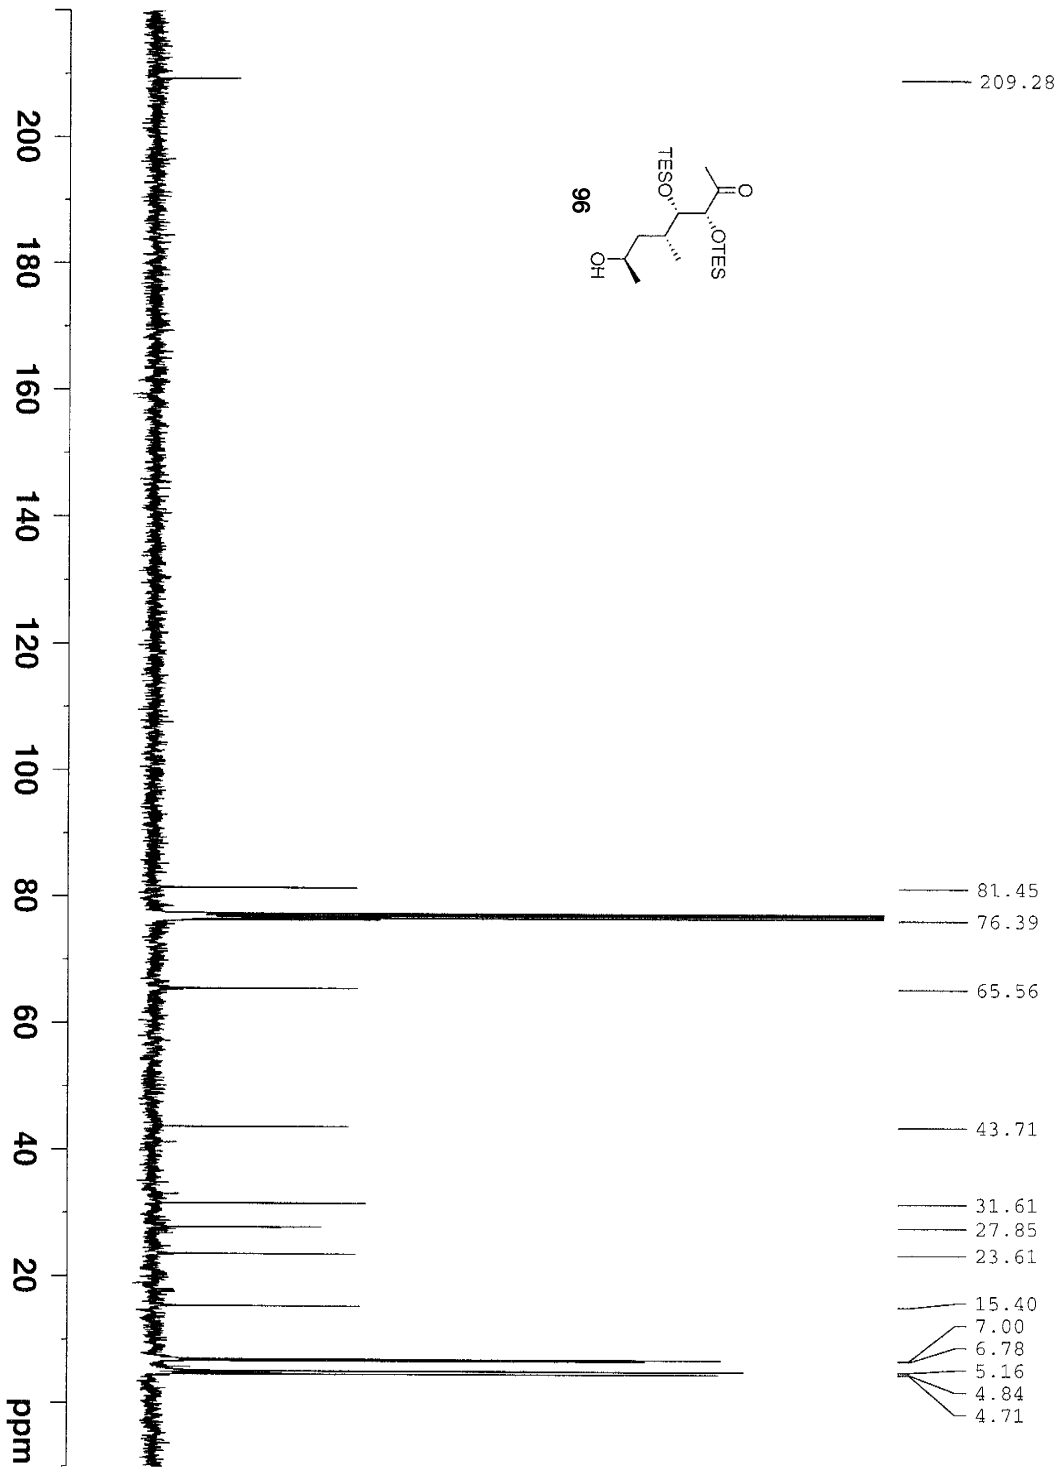

```

Current Data Parameters
NAME          5-33
EXPNO         1
PROCNO        1
DI             /n
USER          .jiang

F2 - Acquisition Parameters
Date_         20070424
Time          18.56
INSTRUM      DPX400
PROBHD       5 mm BBO BB-1H
PULPROG      zgpg30
TD            65536
SOLVENT      SOLVENT
NS            740
DS            4
SWH           2535.629 Hz
FWHM          0.323327 Hz
AQC           1.362164 sec
RG            4597.6
AQ            19.900 us
DE            6.00 us
TE            298.2 K
D1            0.15000001 sec
d11           0.03000000 sec
DELTA        0.05000000 sec
TDC           1

===== CHANNEL f1 =====
NUC1          13C
P1            7.80 us
PC1           -3.00 dB
SFO1         100.6283592 MHz

===== CHANNEL f2 =====
CPDPRG2      waltz16
NUC2          135.00 us
PCPD2        135.00 us
PL2          17.40 dB
PL12         17.40 dB
PL13         17.40 dB
SFO2         400.0116000 MHz

F2 - Processing parameters:
SI           32768
SF           100.6283592 MHz
WDW          EM
SSB          0
L3           3.00 Hz
GB           0
PC           1.40
  
```



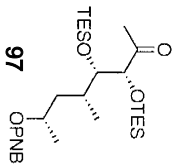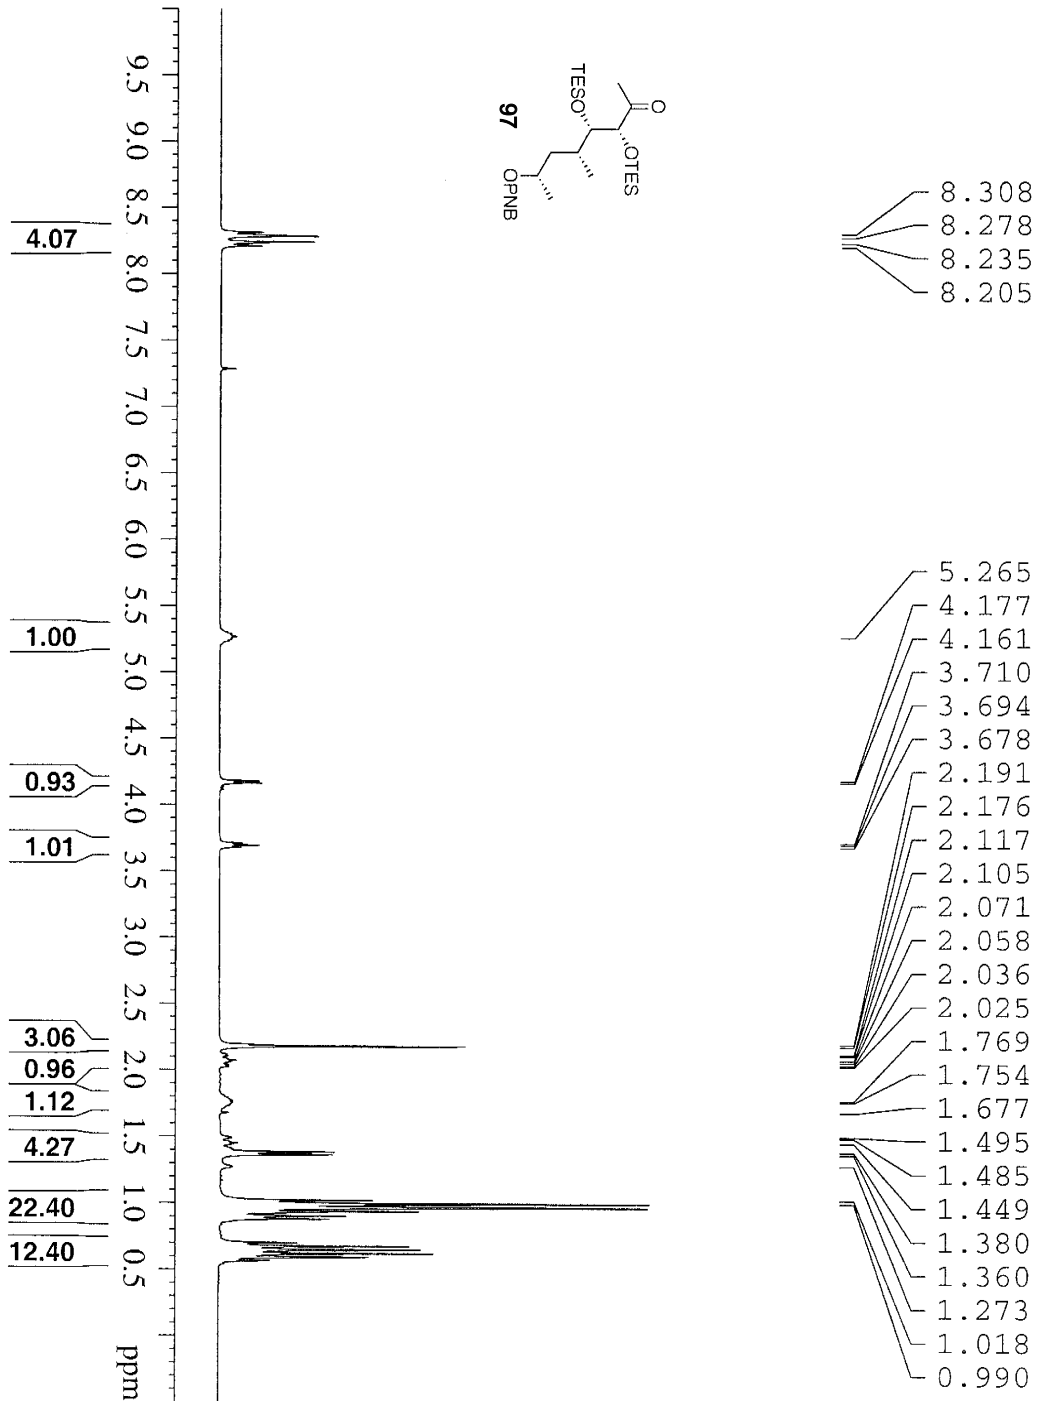

Current Data Parameters  
 Name: 5-32  
 EXNO: 1  
 PROGNO: /n  
 DN: 1  
 USR: 1  
 Chan: 1

F2 - Acquisition Parameters  
 Date\_: 20070424  
 Time: 17.33  
 INSTRUM: PEX300  
 PULPROG: zgpg30  
 TD: 32768  
 SOLVENT: CDCl3  
 NS: 32  
 DS: 2  
 SWH: 4789.272 Hz  
 FIDRES: 0.146157 Hz  
 AQ: 3.421029 sec  
 DE: 104.400 usec  
 TE: 298.2 K  
 D1: 2.00000000 sec  
 TDO: 1

\*\*\*\*\* CHANNEL f2: \*\*\*\*\*  
 NUC1: 13  
 P1: 9.00 usec  
 PL1: 0.00 dB  
 SFO1: 300.132109 MHz

F2 - Processing parameters  
 SI: 32768  
 SF: 300.132109 MHz  
 WCN: 4096  
 SSB: 0  
 LB: 0.00 Hz  
 GB: 0  
 PC: 1.00



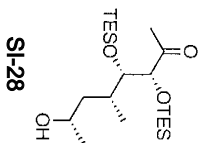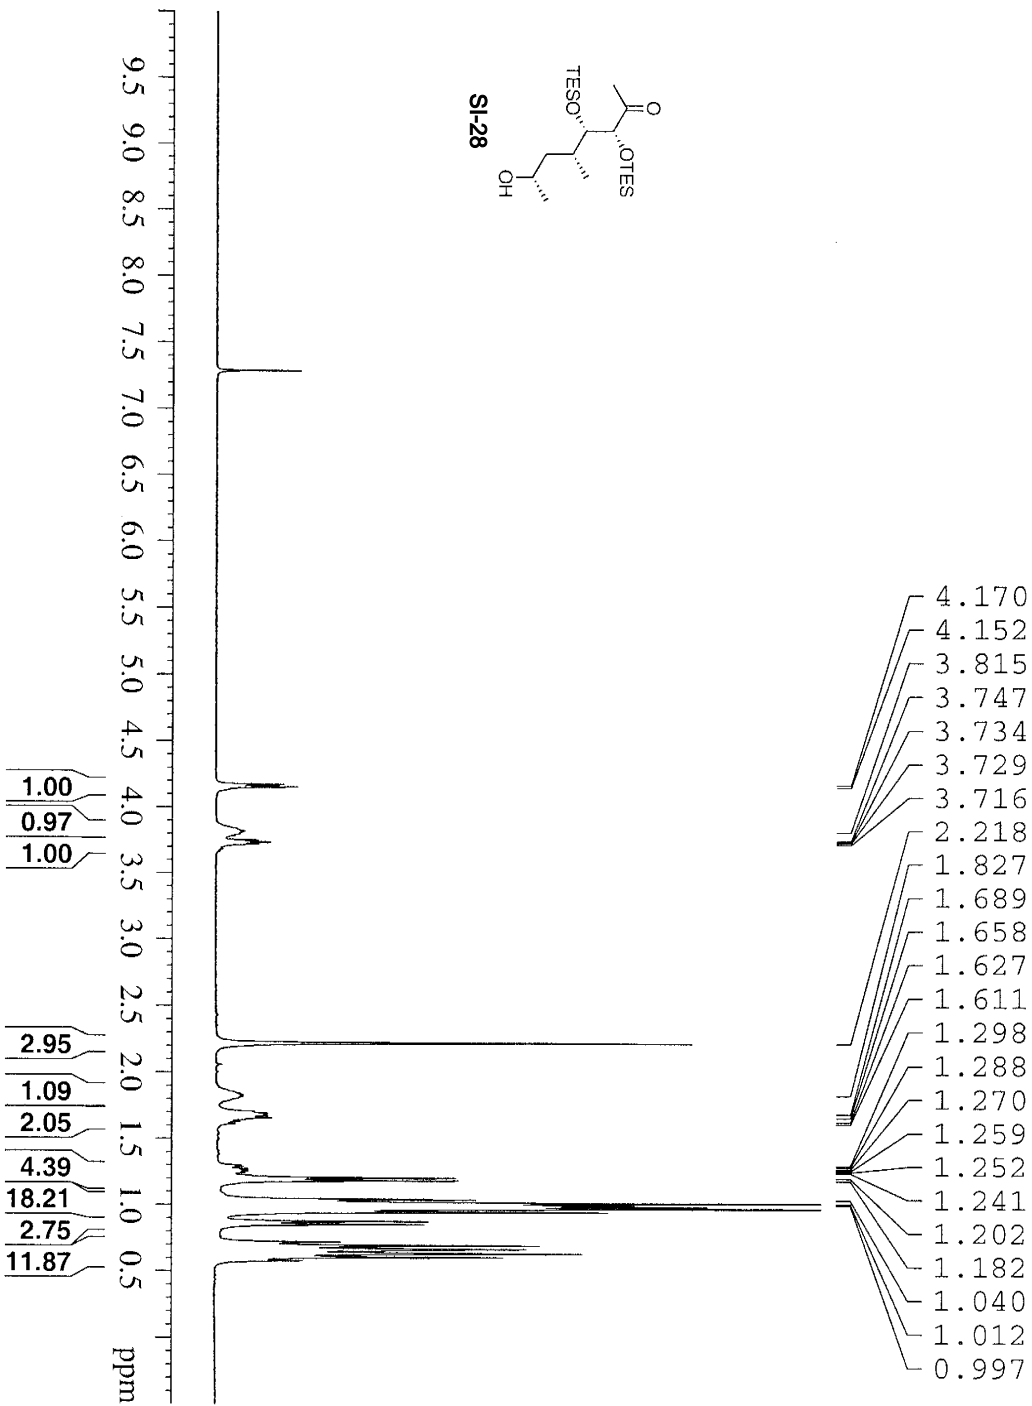

Current Data Parameters  
 NAME: SI-28  
 EXNO: 2  
 PROCNO: 1  
 DIR: /n  
 USER: Listing

F2 - Acquisition Parameters  
 Date\_: 20070426  
 Time: 11.14  
 INSTRUM: DSW446  
 PROBD: HPL  
 PULPROG: zgpg30  
 TD: 2430  
 SFO1: 32768  
 SOLVENT: CDCl3  
 DS: 1  
 SWH: 4789.272 Hz  
 FIDRES: 0.146157 Hz  
 AQ: 3.4219291 sec  
 RG: 104.400 usec  
 CE: 5.00 usec  
 TE: 298.2 K  
 TD0: 2.0000000 sec  
 TDO: 1

\*\*\*\*\* CHANNEL f1 \*\*\*\*\*  
 NUC1: 1H  
 P1: 9.10 usec  
 PL1: -3.00 dB  
 SFO1: 300.1321009 MHz

F2 - Processing parameters  
 SF: 300.1300000 MHz  
 WDW: no  
 SSB: 0  
 GB: 0.00 Hz  
 PC: 1.00

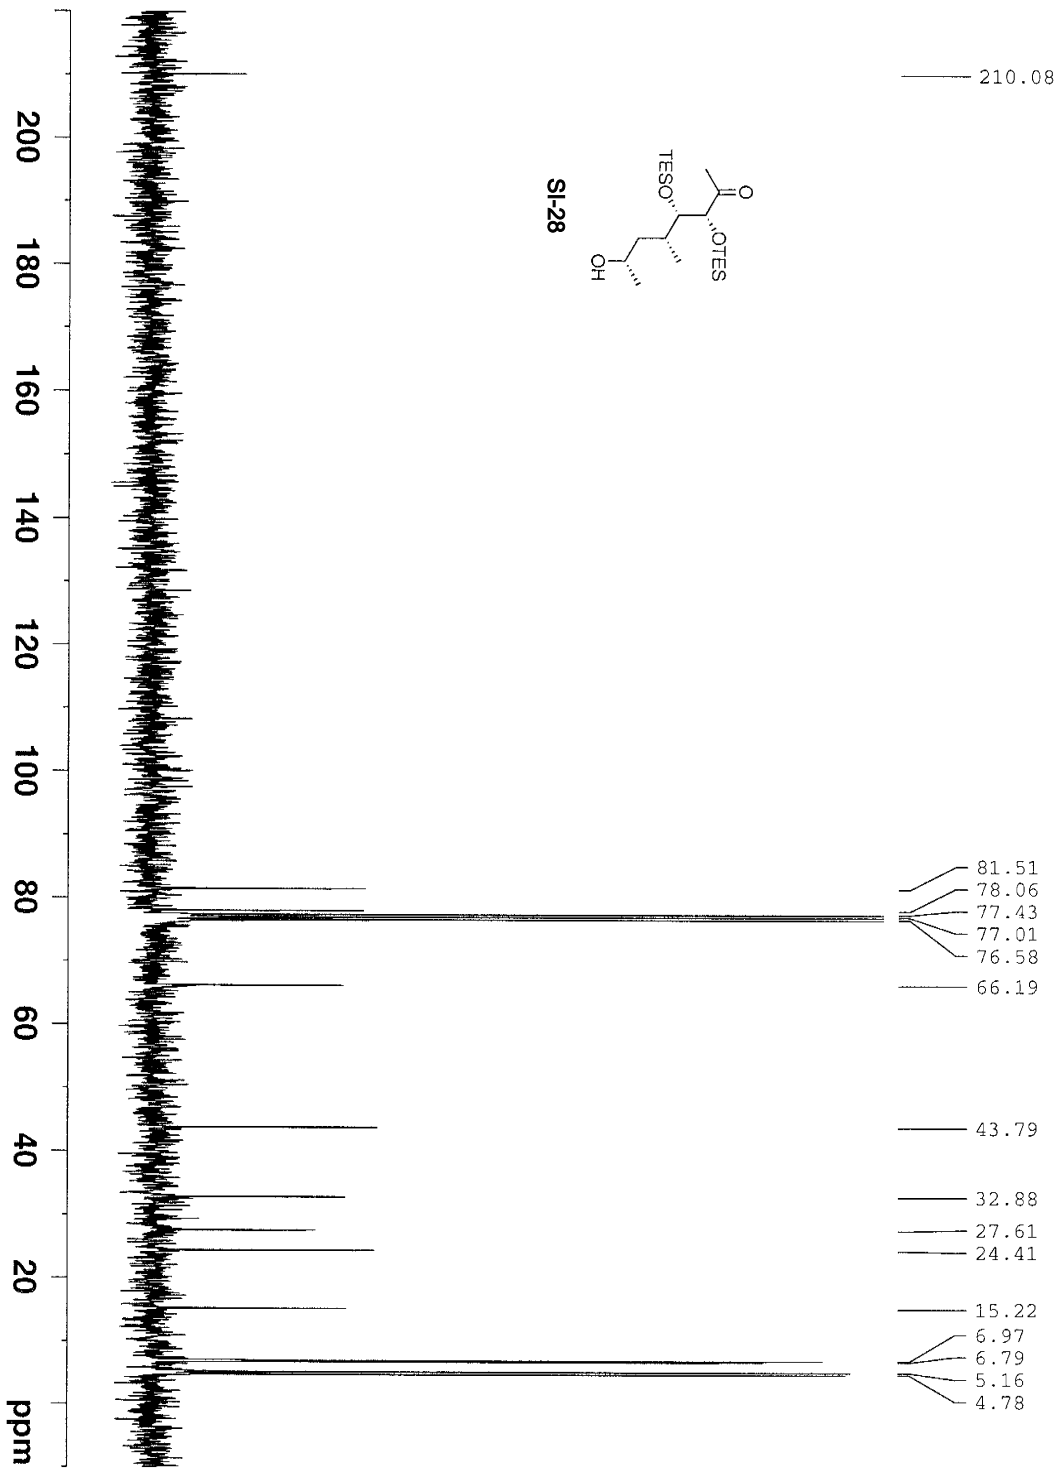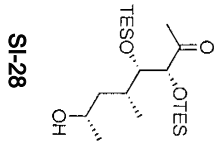

Current Data Parameters  
 NAME 5-40  
 EXPNO 1  
 PROCNO 1  
 DU /n  
 USER  
 LANG

F2 - Acquisition Parameters  
 Date\_ 20070426  
 Time 11.26  
 INSTRUM CPX300  
 PROBRD 5 mm QNP 1H/1  
 PULPROG zgpg30  
 TD 65536  
 SOLVENT CDCl3  
 NS 204  
 DS 4  
 SFO 18932.363 Hz  
 FIDRES 0.287360 Hz  
 AQ 1.7480309 s  
 RG 9.952  
 DW 26.550 us  
 DE 6.00 us  
 TE 298.2 K  
 D1 0.15000001 s  
 d11 0.03000000 s  
 DELTA 0.05000000 s  
 TD0 1

===== CHANNEL f1 =====  
 NUC1 13C  
 P1 8.80 us  
 PL1 -3.00 dB  
 SFO1 75.476305 MHz

===== CHANNEL f2 =====  
 CPDPRG2 waltz16  
 NUC2 1H  
 PCPD2 80.00 us  
 PL2 -3.00 dB  
 PL12 17.55 dB  
 PL13 17.55 dB  
 SFO2 300.131205 MHz

F2 - Processing Parameters  
 SI 32768  
 SF 75.4677490 MHz  
 WDM EM  
 SSB 0  
 LB 3.00 Hz  
 GB 0  
 PC 1.40

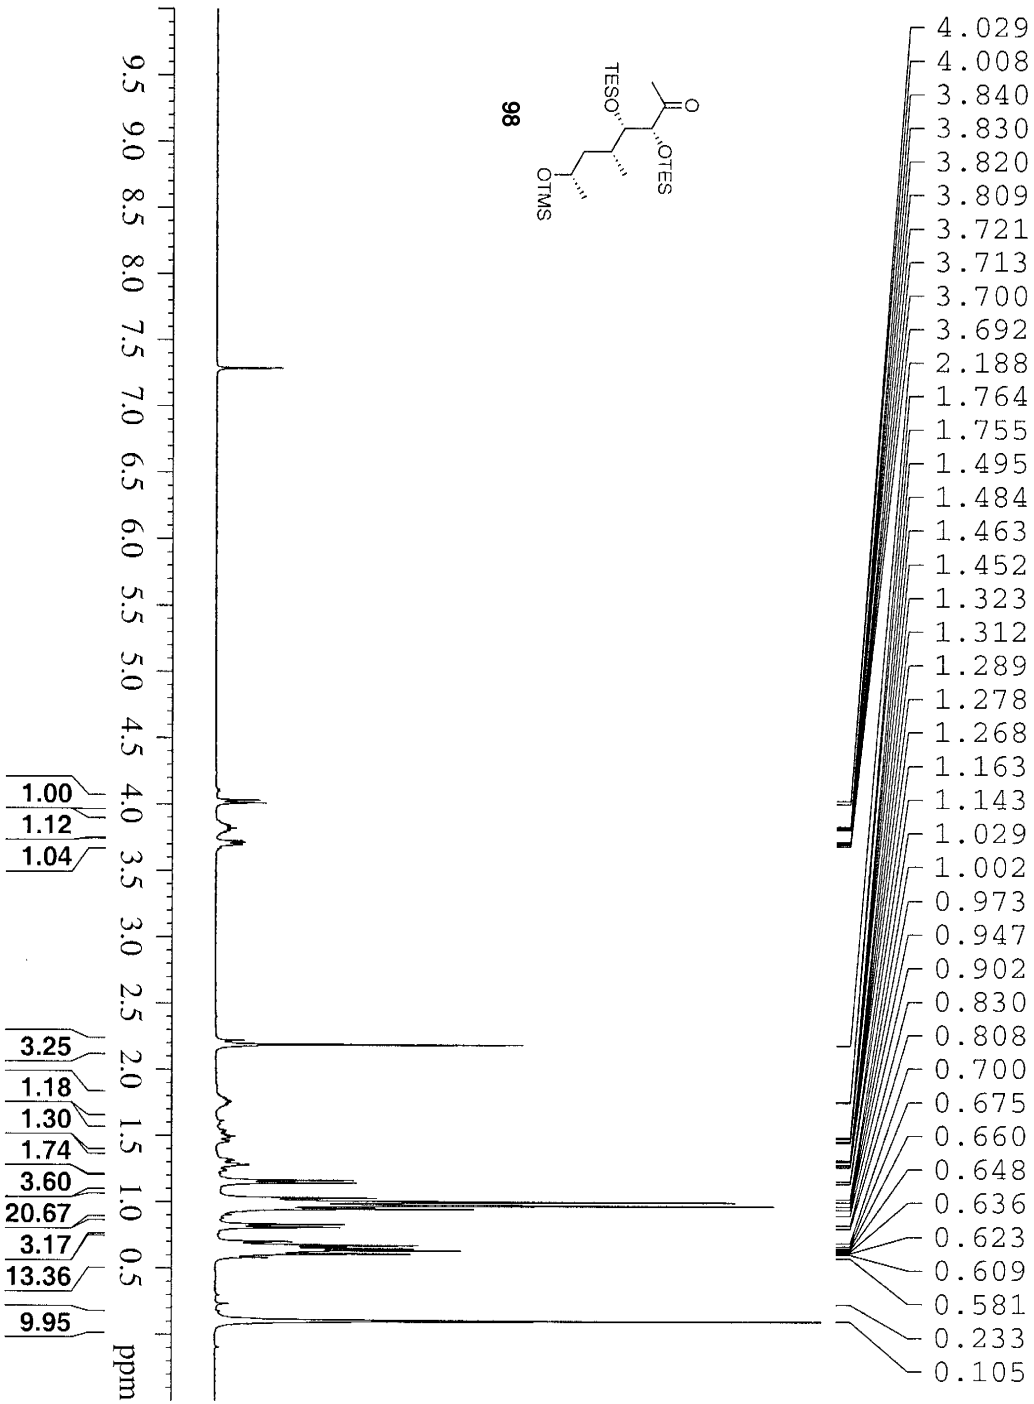

```

Current Data Parameters
NAME: 5-41
EXPNO: 1
PROCNO: 1
DU: /n
USBR: /m
F2 - Acquisition Parameters
Date_: 20070426
Time: 22.31
INSTRUM: DR2
PROBHD: 5 mm QNP
PULPROG: zgpg30
TD: 32768
SOLVENT: CDCl3
DS: 2
AQ: 4.789272 Hz
FIDRES: 0.146157 Hz
AQ: 3.4210281 sec
RG: 655
DE: 104.400 usec
TE: 298.2 K
TD0: 2.0000000 sec
===== CHANNEL f1 =====
NUC1: 1H
P1: 9.10 usec
PL1: -3.00 dB
SFO1: 300.1321009 MHz
F2 - Processing parameters
SI: 300.1300000 MHz
WDW: no
SSB: 0
LB: 0.00 Hz
GB: 0
PC: 1.00

```

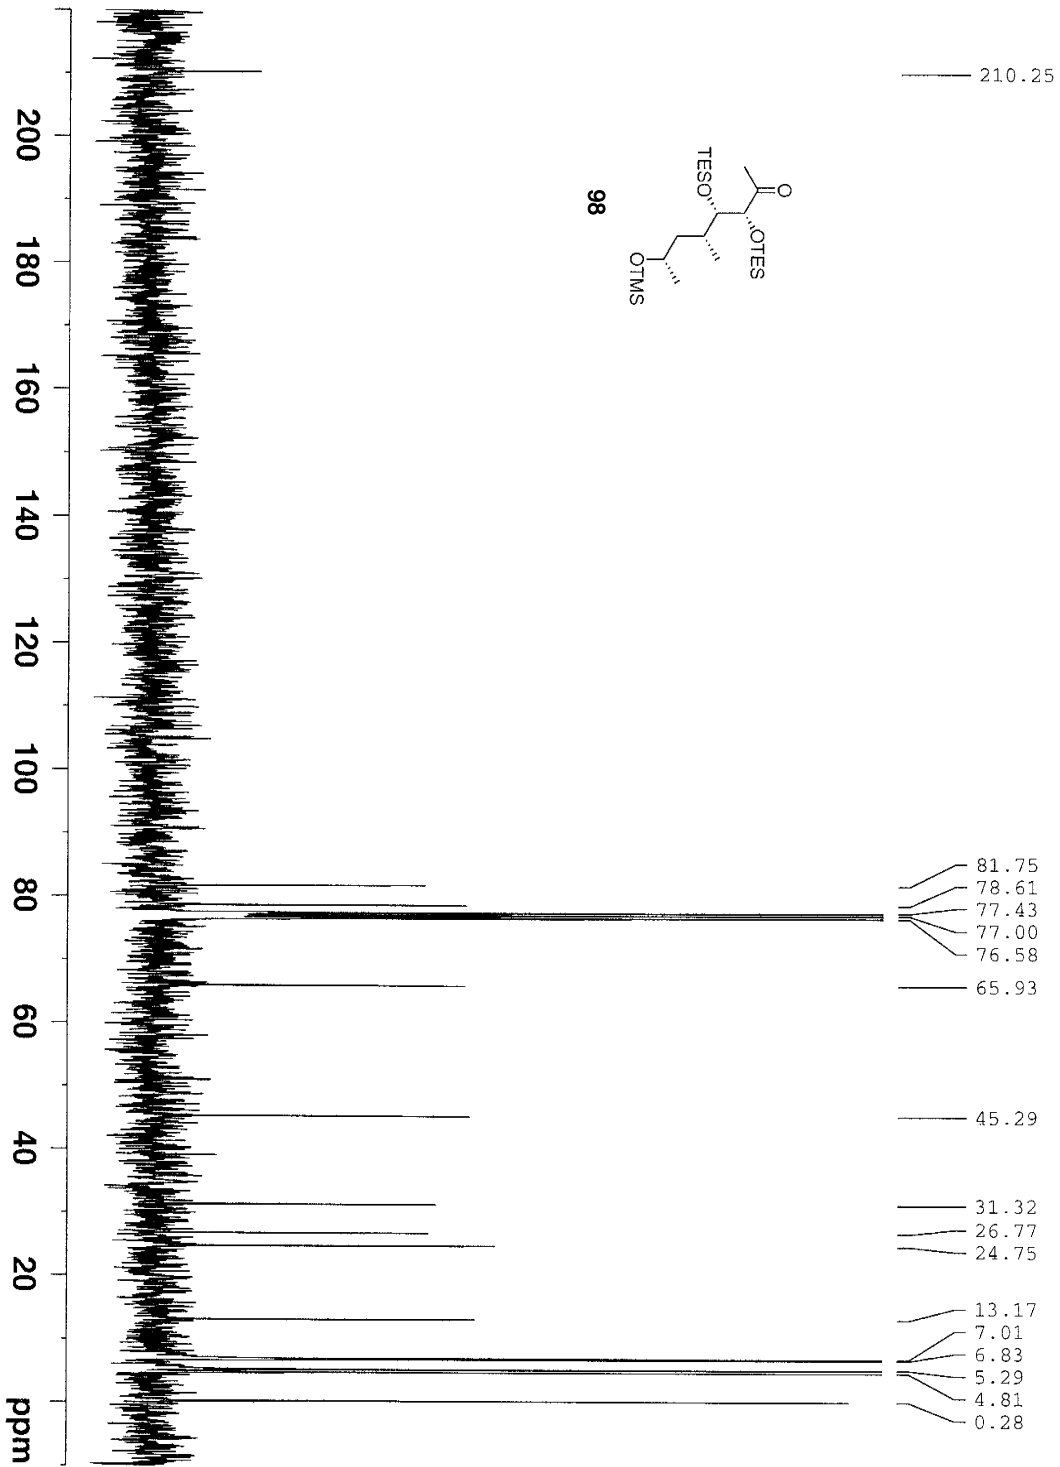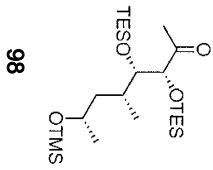

Current Data Parameters  
 NAME 5-42  
 EXPNO 1  
 PROCNO 1  
 DU /5  
 USER Ljanc

F2 - Acquisition Parameters  
 Date\_ 20070426  
 Time 22.45  
 INSTRUM DFX300  
 PROBHD 5 mm QNP 1H/1  
 PULPROG zgpg30  
 TD 65536  
 SOLVENT CDCl3  
 NS 407  
 DS 4  
 SWH 1892.393 Hz  
 FIDRES 0.240320 Hz  
 AQC 1.7460300 s  
 RG 9195.2  
 DE 26.550 us  
 TE 298.2 K  
 D1 0.15000001 s  
 d11 0.03000000 s  
 DELTA 0.05000000 s  
 TDO 1

===== CHANNEL f1 =====  
 NUC1 13C  
 P1 8.80 us  
 PL1 -3.00 dB  
 SFO1 75.476505 MHz

===== CHANNEL f2 =====  
 NUC2 1H  
 WALTZ16  
 RCPD2 80.00 us  
 PL2 -3.00 dB  
 PL12 17.55 dB  
 PL13 17.55 dB  
 SFO2 300.1312005 MHz

F2 - Processing parameters  
 SI 32768  
 SF 75.4677490 MHz  
 WDM EM  
 SSB 0  
 CB 3.00 Hz  
 GB 0  
 PC 1.40



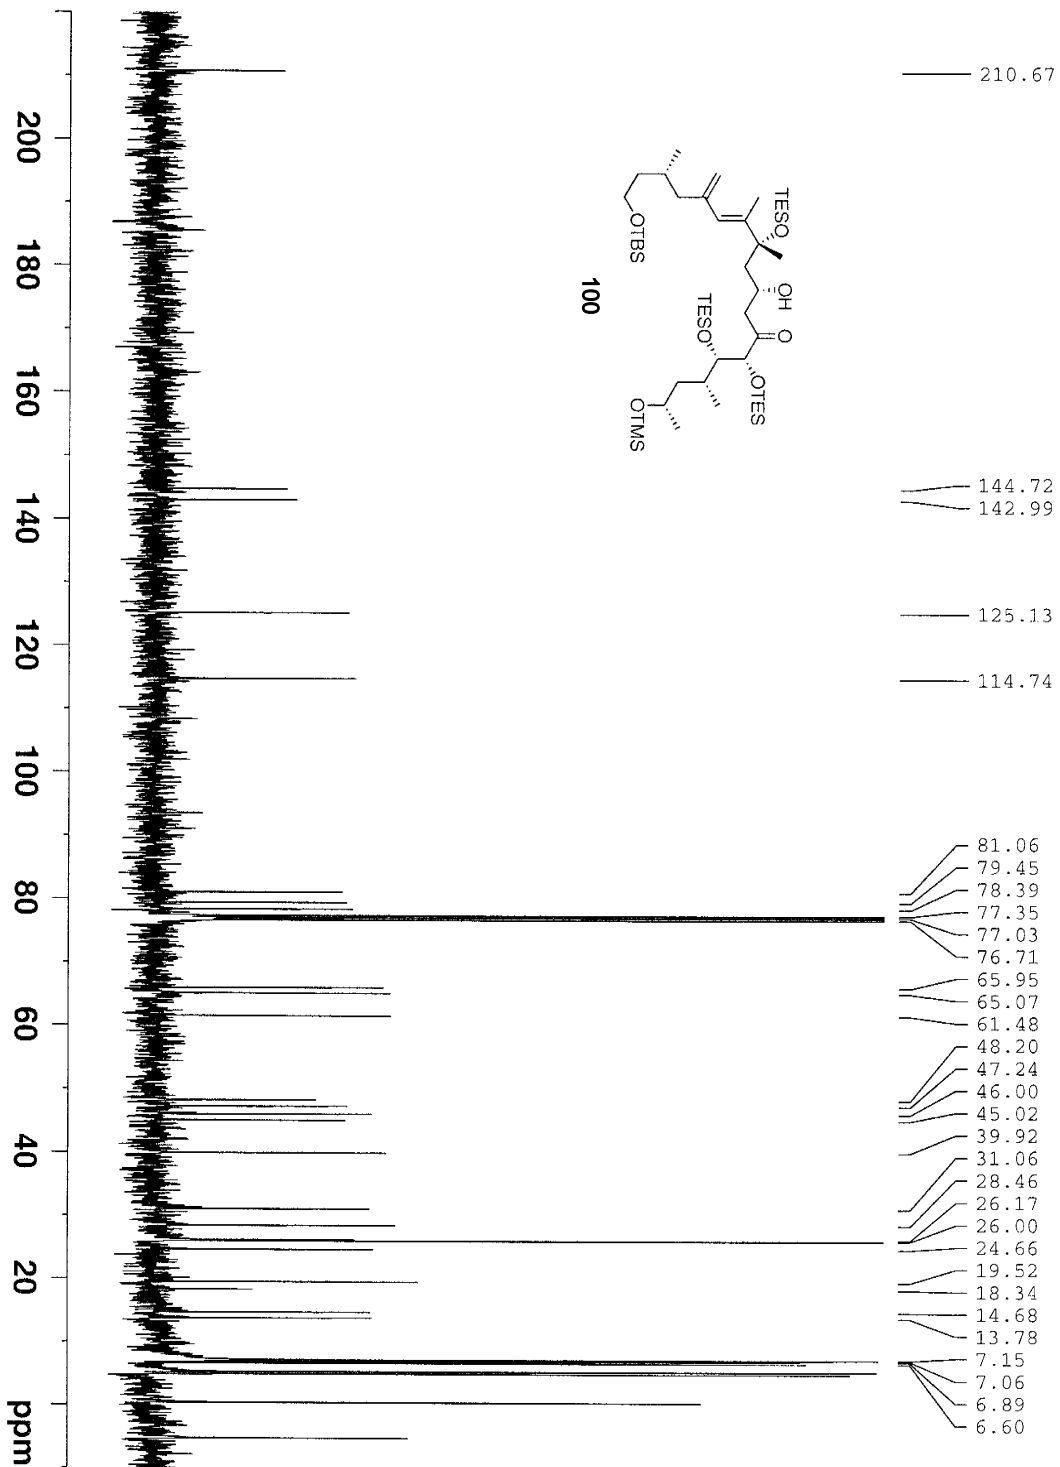

```

Current Data Parameters
NAME          5-50
EXPNO        3
PROCNO       3
PROCRES      /n
USER         J.Lang
F2 - Acquisition Parameters
Date_        20070508
Time         20:38
Pulseprog    zgpg30
PROBHD       5 mm BBO BB-4H
PULPROG      convp30f
TD           2048
SOLVENT      2048
NS           2
DS           2
SWH          4006.410 Hz
FIDRES      1.356255 Hz
AQ          0.2556404 sec
RG          322.5
RQ          124.600 usec
SN          6.00
SS          299.2 X usec
TE          299.2 X
D0          0.00000000 sec
d11         0.00000000 sec
d12         0.00000000 sec
tau         0.00024960 sec
===== CHANNEL f1 =====
NUC1         1H
P1           1.00 usec
PL1          0.00 dB
SFO1         400.0120000 MHz
===== GRADIENT CHANNEL =====
GPMX2        100
SFO2         100.6261316 MHz
GR21         0.00 %
GR22         10.00 %
P16          1000.00 usec
F1 - Acquisition Parameters
HD0          128
TD           128
SFO1         400.012 MHz
FIDRES      31.300079 Hz
SI          0.016 EPM
RG          0
F2 - Processing parameters
SI          32768
SF          100.5825950 MHz
EX          0
SSB         0
GB          0
PC          1.40
  
```



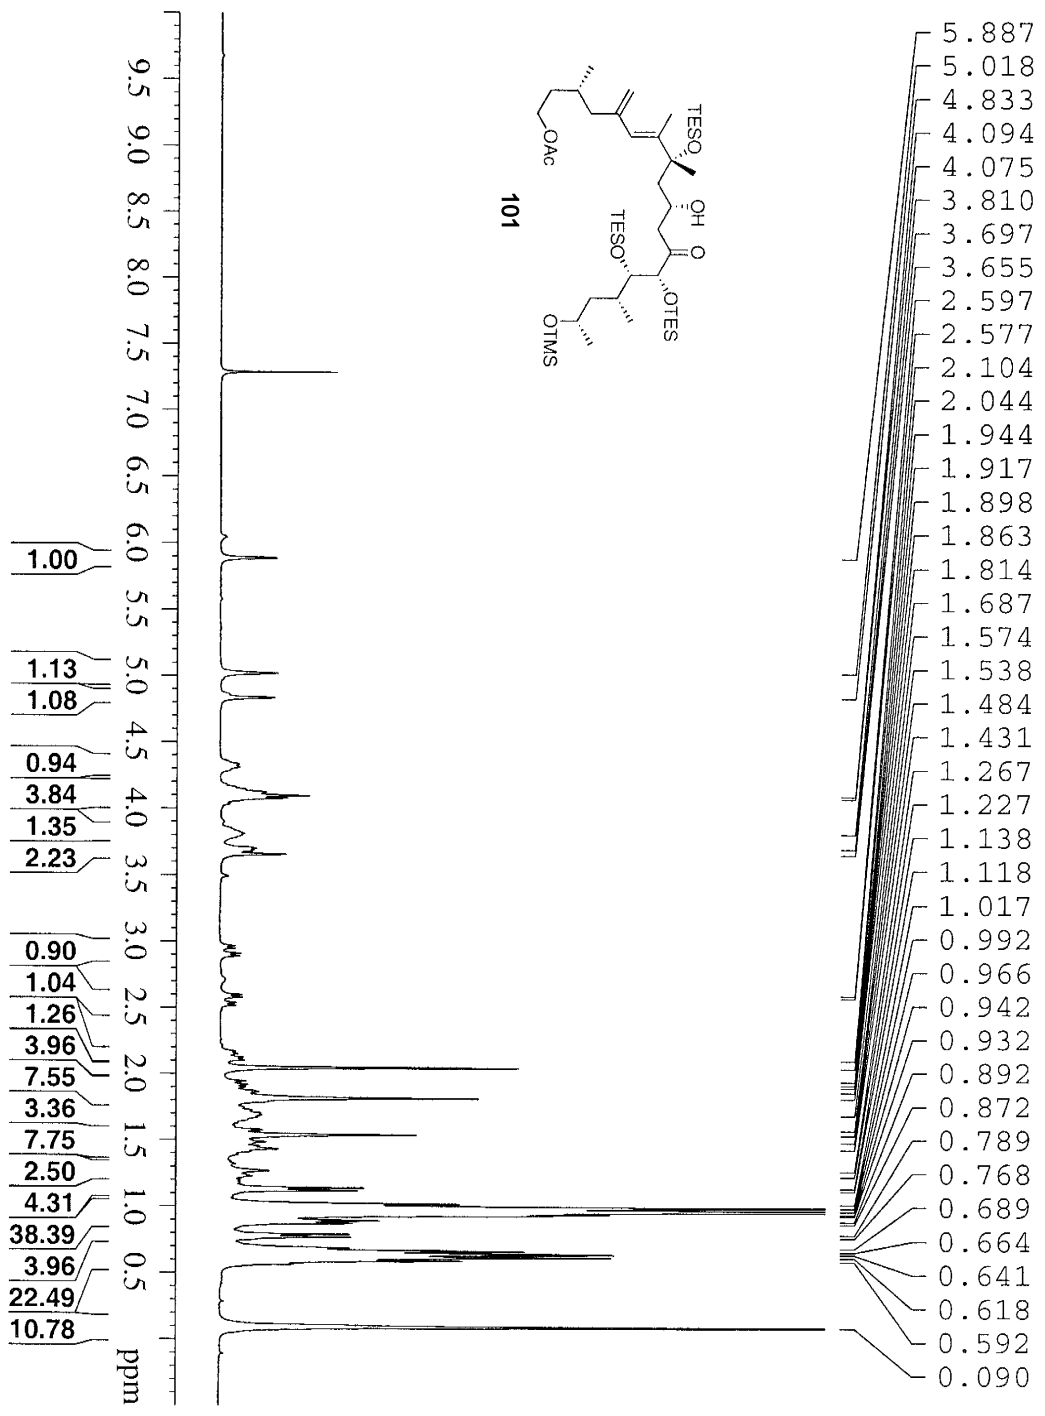

Current Data Parameters  
 Name: 7-84-1  
 ExpNO: 1  
 PROCNO: 1  
 DU: 1  
 USER: Llsmy

F2 - Acquisition Parameters  
 Date\_: 20080310  
 Time: 21.23  
 Instrument: spect  
 Processor: 5 mm QNP  
 PULPROG: zgpg30  
 TD: 32768  
 SOLVENT: CDCl3  
 NS: 2  
 DS: 2  
 SWH: 4789.272 Hz  
 FIDRES: 0.146457 Hz  
 AQ: 1.111 sec  
 RG: 3.4210291  
 DW: 104.400 usec  
 DE: 6.00 usec  
 TE: 298.2 K  
 D1: 2.00000000 sec  
 T20: 1

\*\*\*\*\* CHANNEL f1 \*\*\*\*\*  
 NUC1: 1H  
 P1: 9.00 usec  
 PL1: -3.00 dB  
 SFO1: 300.132109 MHz

F2 - Processing parameters  
 SI: 300.132109 MHz  
 SF: 300.132109 MHz  
 WTW: 0.00 Hz  
 SSB: 0  
 CB: 0  
 PC: 1.00

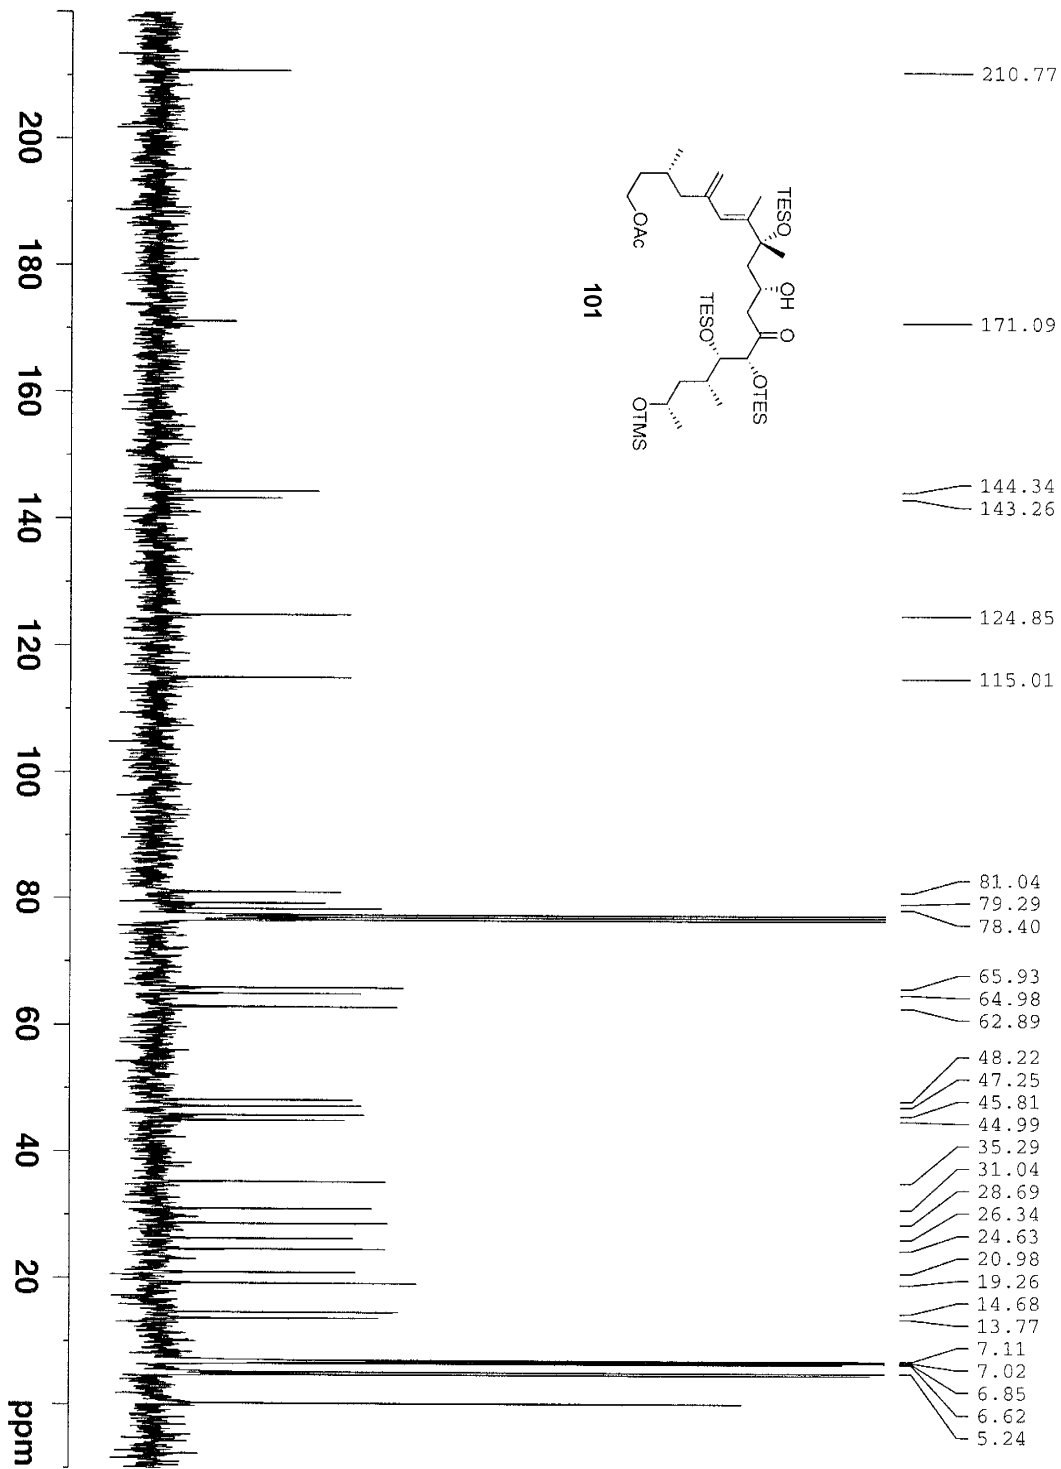

- 210.77
- 171.09
- 144.34
- 143.26
- 124.85
- 115.01
- 81.04
- 79.29
- 78.40
- 65.93
- 64.98
- 62.89
- 48.22
- 47.25
- 45.81
- 44.99
- 35.29
- 31.04
- 28.69
- 26.34
- 24.63
- 20.98
- 19.26
- 14.68
- 13.77
- 7.11
- 7.02
- 6.85
- 6.62
- 5.24

Current Data Parameters  
 NAME 7-84-2  
 EXPNO 3  
 PROCNO 1  
 DU 1/n  
 USER Liang

F2 - Acquisition Parameters  
 Date\_ 20080310  
 Time 21.40  
 INSTRUM DPX300  
 PULPROG zgpg30  
 TD 65536  
 SOLVENT CCl3  
 DS 2/7  
 SWH 18832.393 Hz  
 FIDRES 0.287160 Hz  
 AQ 1.7400308 sec  
 RG 9195.2  
 DW 26.550 usec  
 DE 6.00 usec  
 TE 298.2 K  
 D1 0.15000001 sec  
 d11 0.03000000 sec  
 DELTA 0.05000000 sec  
 TDC 1

==== CHANNEL f1 =====  
 NUCl 13C  
 P1 8.86 usec  
 PC1 -3.00 dB  
 SFO1 75.4760905 MHz

==== CHANNEL f2 =====  
 CPDPRG2 waltz16  
 NUC2 1H  
 P2 80.00 usec  
 PCP2 -3.00 dB  
 PL2 -3.00 dB  
 PL12 17.55 dB  
 PL13 17.55 dB  
 SFO2 300.1312005 MHz

F2 - Processing parameters  
 SI 32768  
 SF 75.4677490 MHz  
 WDW EM  
 SSB 0  
 LB 3.00 Hz  
 GB 0  
 PC 1.40

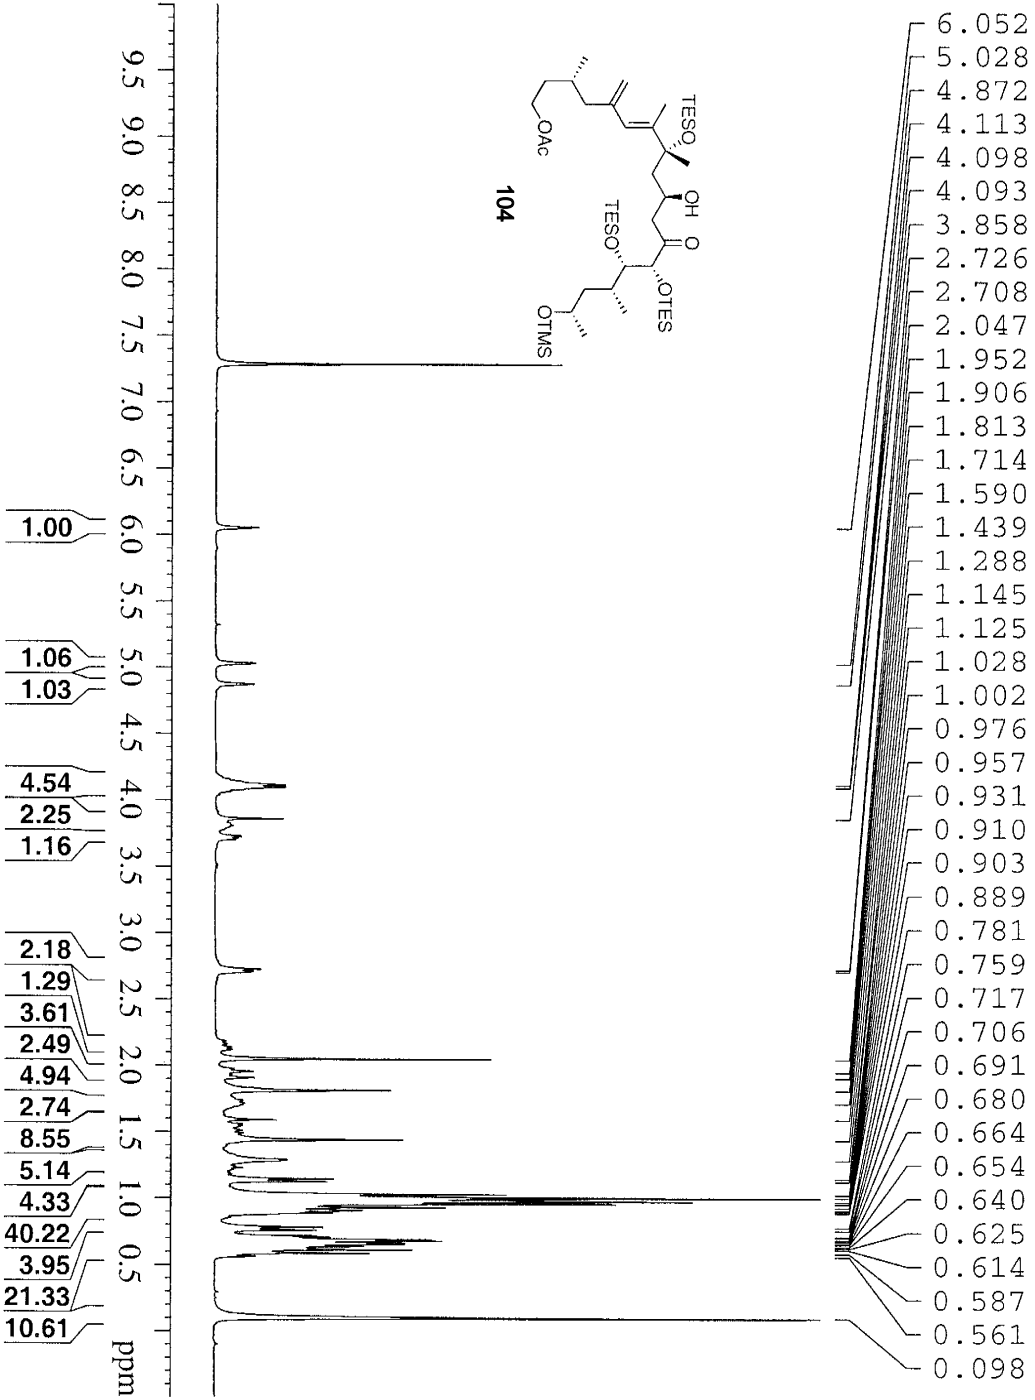

Current Data Parameters  
 Name: 104  
 EXPNO: 5  
 PROCNO: 1  
 DE: /h  
 USR: /n  
 Liang

F2 - Acquisition Parameters  
 Date\_: 20080218  
 Time: 15:36  
 INSTRUM: zgpg30  
 PROBHD: 5 mm QNP 291  
 PULPROG: zgpg30  
 TD: 32768  
 SOLVENT: CDCl3  
 NS: 2  
 DS: 4  
 SWH: 4789.272 Hz  
 FIDRES: 0.146157 Hz  
 AQ: 3.4210291 sec  
 RG: 104  
 IQY: 104.400 usec  
 DE: 6.00 usec  
 TE: 298.2 K  
 D1: 2.00000000 sec  
 D10: 1

\*\*\*\*\* CHANNEL f1 \*\*\*\*\*  
 NUC1: 1H  
 P1: 9.100 usec  
 PL1: -3.00 dB  
 SFO1: 300.132109 MHz

F2 - Processing parameters  
 SI: 300.132000 MHz  
 SF: 300.132000 MHz  
 WDW: EM  
 SSB: 0  
 LB: 0.30 Hz  
 GB: 0  
 PC: 1.00

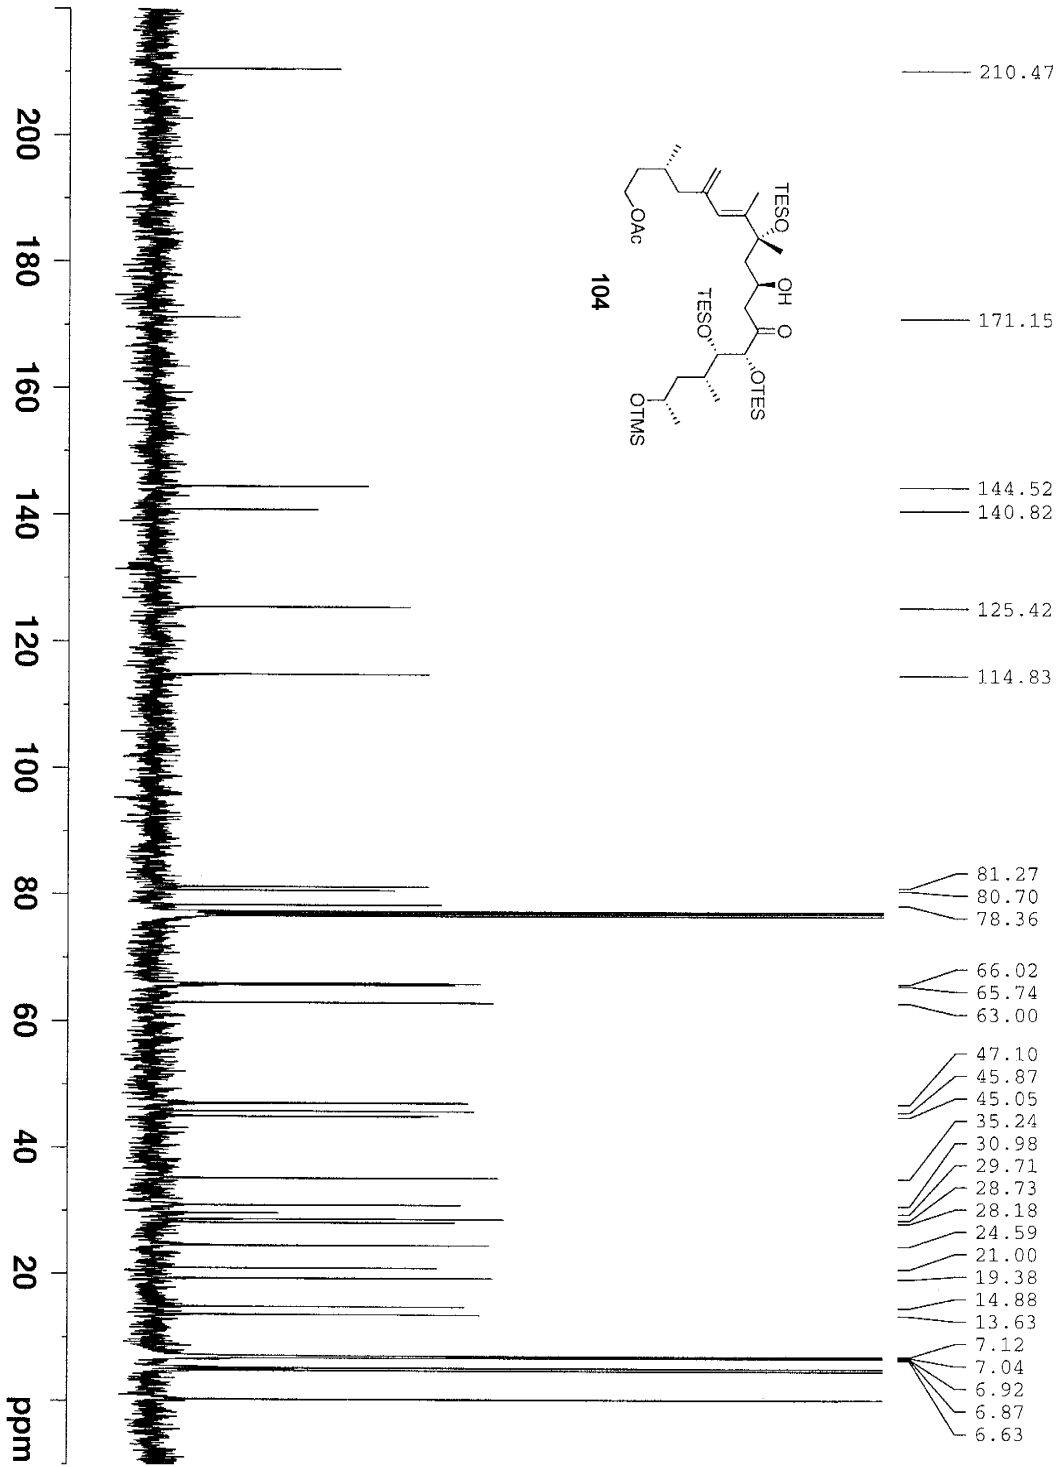

```

Current Data Parameters
NAME      643
EXPNO     2
PROCNO    1
PROCNO    1
F2 - Acquisition Parameters
Date_     20071011
Time      18.28
INSTRUM   DPK400
PROBHD    5 mm BBO BB-1H
PULPROG   zgpg30
TD         65536
SOLVENT   SOLVENT
NS         253
DS         4
SWH        26135.628 Hz
FIDRES     0.381929 Hz
AQ         1.3042186 s
RG         4597.6
WDW        19.900 us
DE         6.00 us
TE         299.2 K
D1         C.15600001 s
d11        C.03000000 s
DELTA     C.05000000 s
TD0        1

===== CHANNEL f1 =====
NUC1       13C
P1         7.80 us
PL1        -3.00 dB
SFO1       100.6261891 MHz

===== CHANNEL f2 =====
CPDPRG2   waltz16
NUC2       135.00 us
PCPD2     135.00 us
PL2        17.40 dB
PL12      17.40 dB
PL13      17.40 dB
SFO2       400.0156000 MHz

F2 - Processing parameters
SI         32768
SF         100.6261891 MHz
WDW        EM
SSB        0
LB         3.00 Hz
GB         0
PC         1.40
  
```

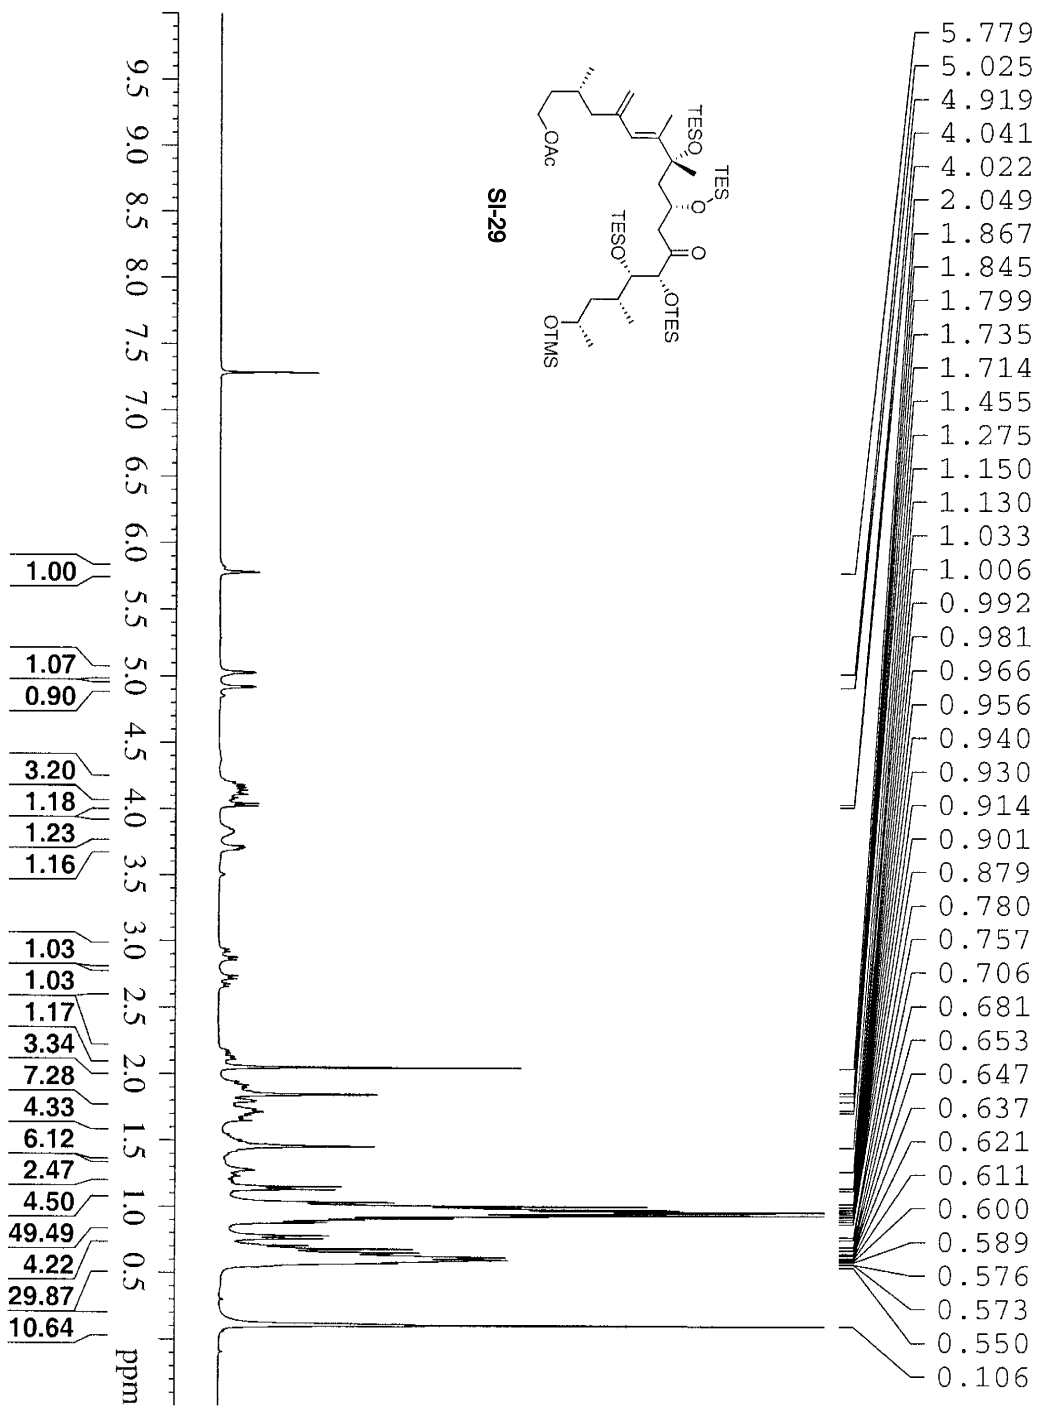

SI-29

```

Current Data Parameters
Date_ 20080315
Time 16.46
INSTRUM DPX300
PROBHD 5 mm QNP
PULPROG zgpg30
TD 32768
SOLVENT CDCl3
DS 2
DE 2.5
SWH 4789.272 Hz
FIDRES 0.14637 Hz
AQ 3.4210291 sec
RG 655.36
DE 104.400 usec
TE 298.2 K
D0 2.0000000 sec
TD0 1
===== CHANNEL f1 =====
NUC1 13C
P1 9.00 usec
PL 0.00 dB
SFO1 300.132109 MHz
F2 - Processing Parameters
SI 320.68 MHz
SF 300.132000 MHz
WDW nc
SSB 0
LB 0.00 Hz
GB 0
MC 1.00
  
```

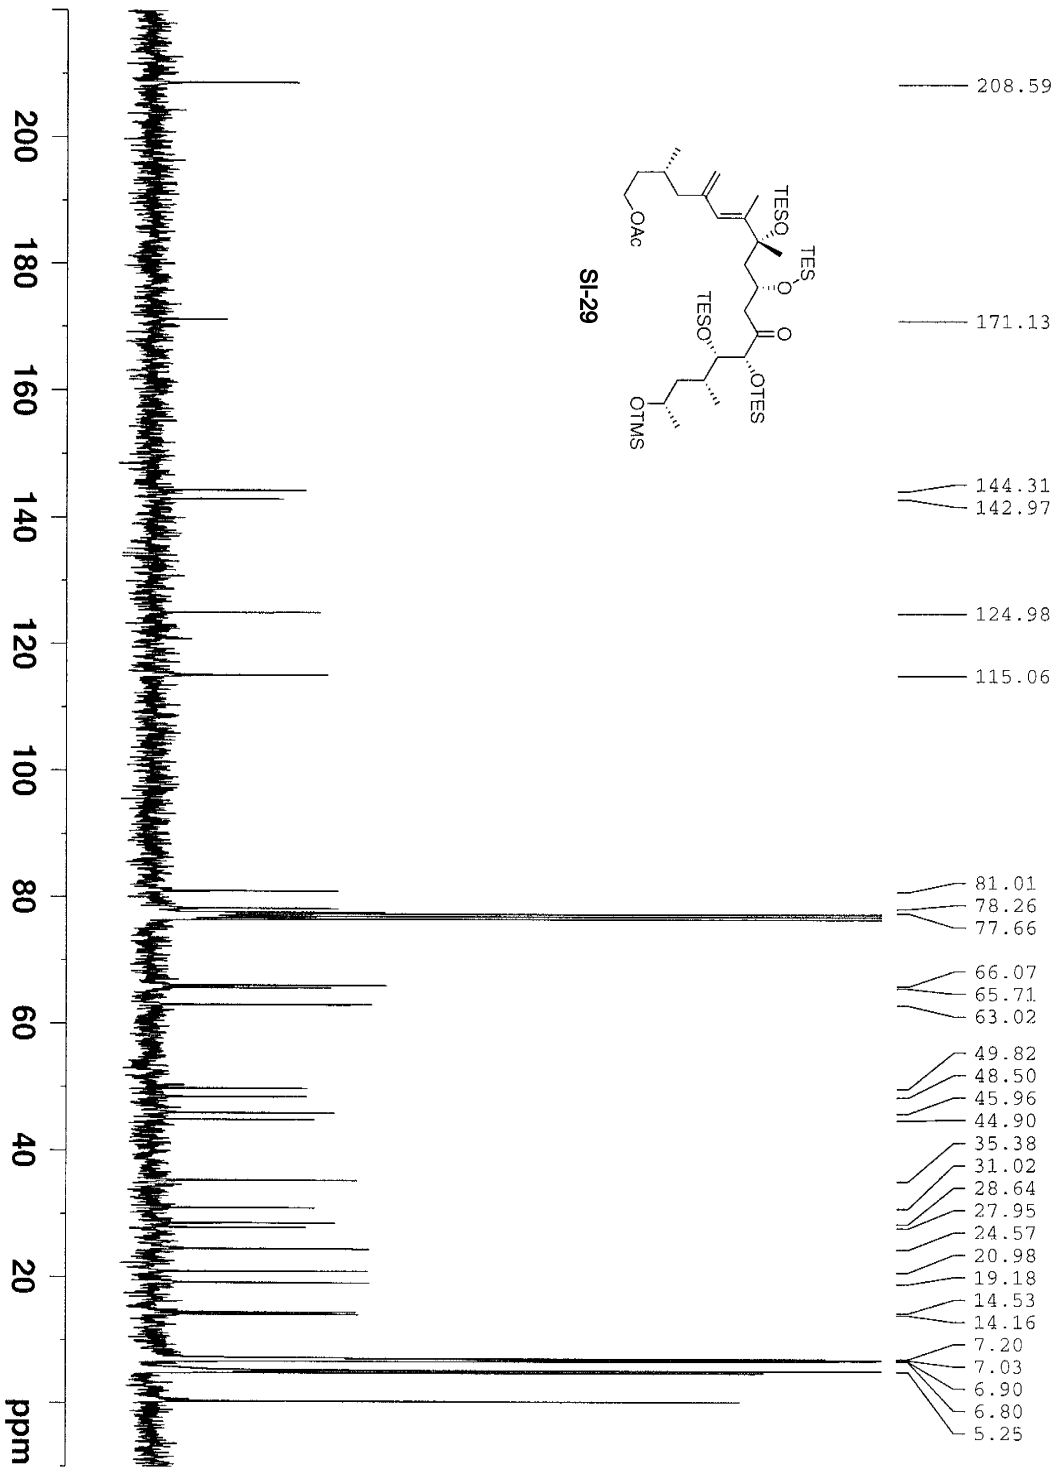

SI-29

- 208.59
- 171.13
- 144.31
- 142.97
- 124.98
- 115.06
- 81.01
- 78.26
- 77.66
- 66.07
- 65.71
- 63.02
- 49.82
- 48.50
- 45.96
- 44.90
- 35.38
- 31.02
- 28.64
- 27.95
- 24.57
- 20.98
- 19.18
- 14.53
- 14.16
- 7.20
- 7.03
- 6.90
- 6.80
- 5.25

```

Current Data Parameters
NAME      7-100-1
EXPNO    3
PROCNO   1
ID       /n
USER     Liang

F2 - Acquisition Parameters
Date_    20080315
Time     17.04
INSTRUM  DPK300
PROBHD   5 mm QNP 1H/1
PULPROG  zgpg30
TD       65536
SFO      300.13
AQ       5.2
RG       32
DS       4
SWH      18832.393 Hz
FIDRES   0.267360 Hz
AQ       1.7400308 sec
RG       9195.2
DE       26.550 uF
TE       6.00 uF
D1       0.15000001 sec
d11      0.03000000 sec
DELTA    0.05000000 sec
TD0      1

===== CHANNEL f1 =====
NUC1     13C
P1       9.80 uF
PL1      3.00 dB
SFO1     75.4763505 MHz

===== CHANNEL f2 =====
CPDPRG2  waltz16
NUC2     1H
PCPD2    80.00 uF
PL2      -3.00 dB
PL12     17.55 dB
PL13     17.55 dB
SFO2     300.1312005 MHz

F2 - Processing parameters
SI       32768
SF       75.4677490 MHz
WDW      EM
SSB      0
GB       0
PC       3.00 MHz
SC       1.40

```



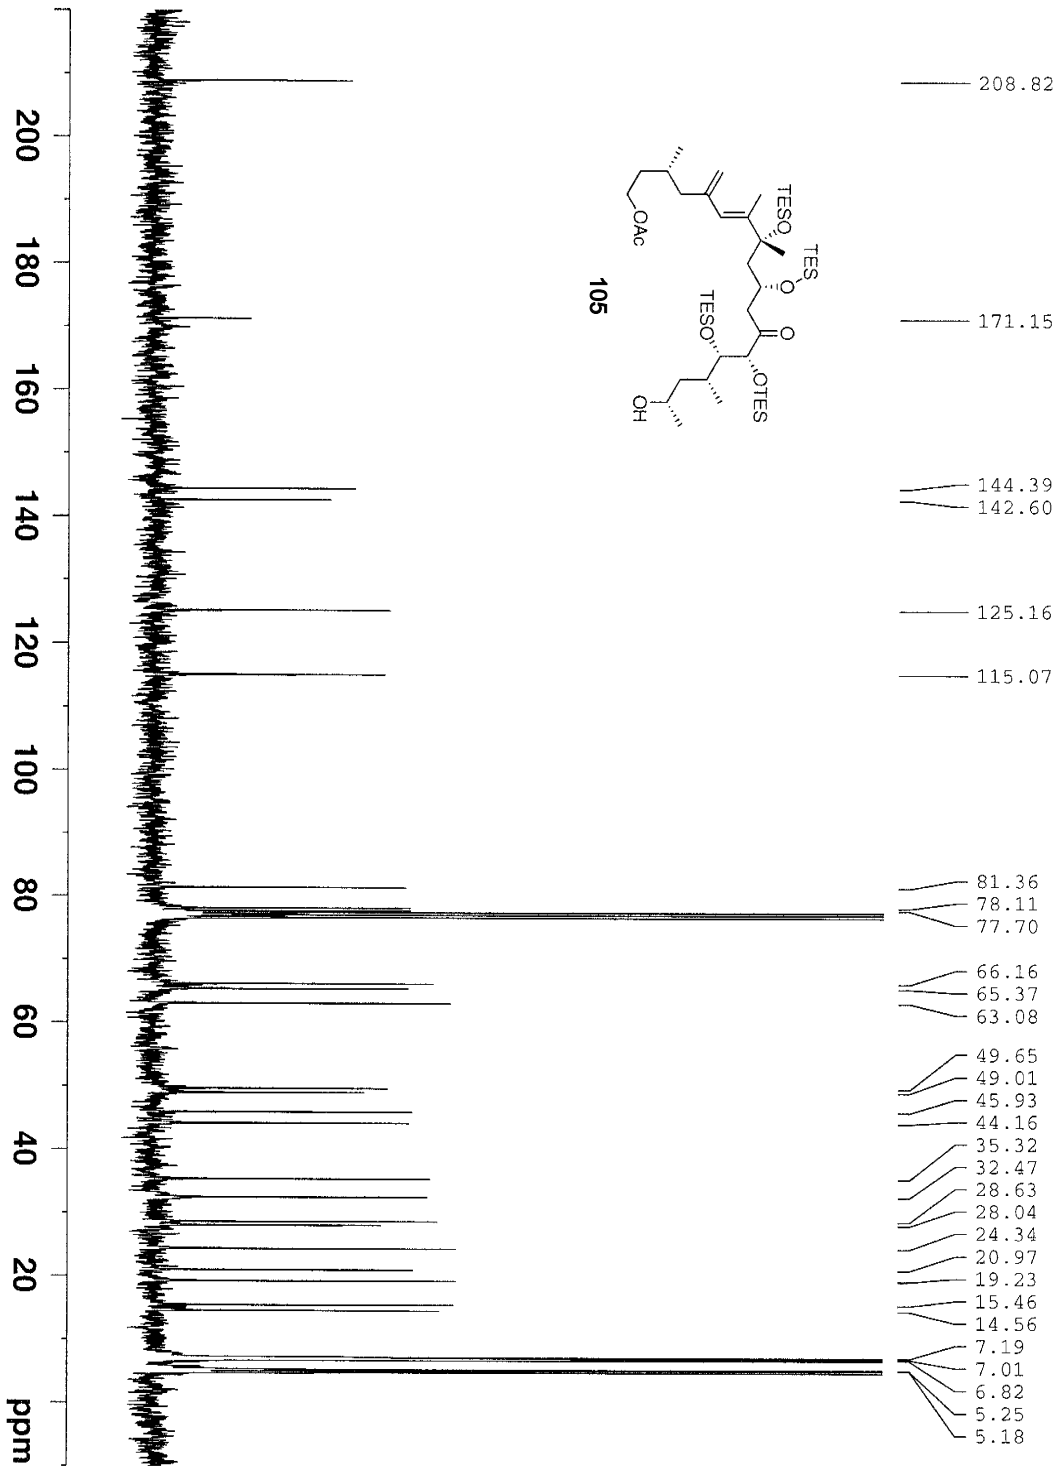

- 208.82
- 171.15
- 144.39
- 142.60
- 125.16
- 115.07
- 81.36
- 78.11
- 77.70
- 66.16
- 65.37
- 63.08
- 49.65
- 49.01
- 45.93
- 44.16
- 35.32
- 32.47
- 28.63
- 28.04
- 24.34
- 20.97
- 19.23
- 15.46
- 14.56
- 7.19
- 7.01
- 6.82
- 5.25
- 5.18

Current Data Parameters  
 NAME: 8-103  
 EXPNO: 1  
 PROCNO: 1  
 DT: 1/n  
 USER: L:ang

F2 - Acquisition Parameters  
 Date\_: 20080317  
 Time: 10.58  
 INSTRUM: DPX100  
 PROBHD: 5 mm QNP 1H/1  
 PULPROG: zgpg30  
 TD: 65536  
 SOLVENT: CDCl3  
 NS: 423  
 DS: 4  
 SWH: 18832.363 Hz  
 STDRS: 0.262760 Hz  
 AQ: 1.7400308 s  
 RG: 91982  
 DW: 26.556 us  
 DE: 6.00 us  
 TE: 298.2 K  
 D1: 0.15000001 s  
 d11: 0.03000000 s  
 DELTA: 0.05000000 s  
 TDO: 1

==== CHANNEL f1 =====  
 NUC1: 13C  
 P1: 8.80 us  
 PL1: -3.00 dB  
 SFO1: 75.4780505 MHz

==== CHANNEL f2 =====  
 NUC2: 1H  
 P2: 80.00 us  
 PL2: -3.00 dB  
 PL12: 17.55 dB  
 PL13: 17.55 dB  
 SFO2: 300.132005 MHz

F2 - Processing parameters  
 SI: 32768  
 SF: 75.4677494 MHz  
 WDW: EM  
 SSB: 0  
 LB: 3.00 Hz  
 GB: 0  
 PC: 1.40







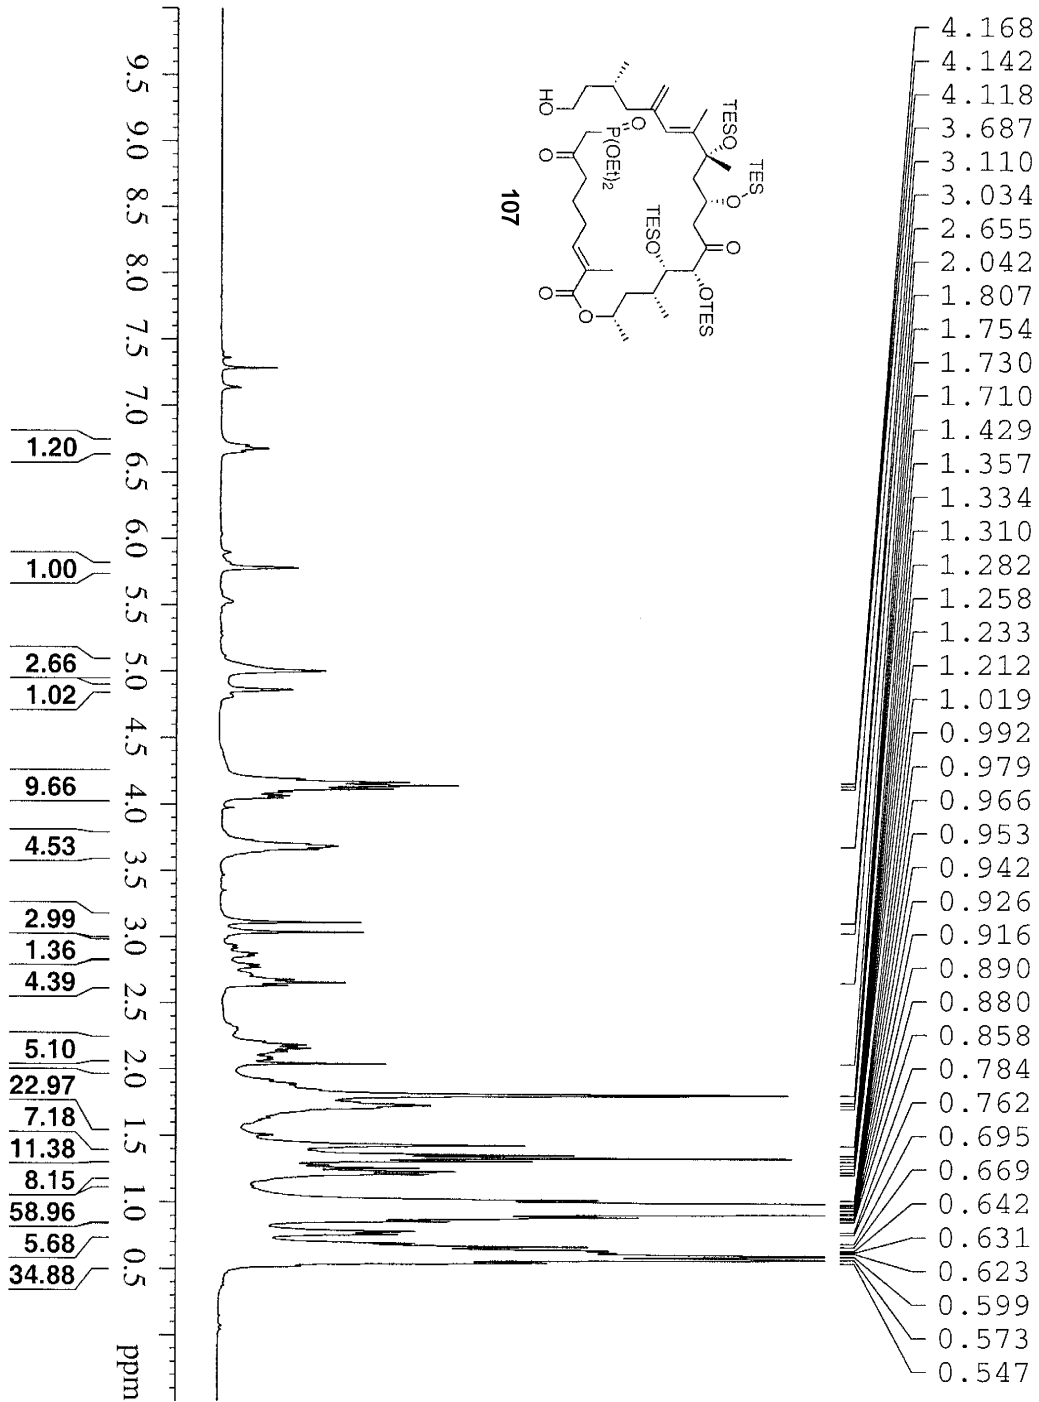

Current Data Parameters  
 Name: 9-12  
 EXNO: 1  
 PROCNO: 1  
 DN: /n  
 USER: Liang

F2 - Acquisition Parameters  
 Date\_: 20080126  
 Time: 12.07  
 Name: D1310  
 INSTRUM: spect  
 PROBD: 5 mm QNP  
 PULPROG: zgpg30  
 TD: 2630  
 SFO1: 32768  
 SOLVENT: CDCl3  
 DS: 12  
 DE: 1.00  
 AS: 4789.272 Hz  
 SMH: 0.146157 Hz  
 FIDRES: 3.4210291 sec  
 AQ: 2.727272727 sec  
 DW: 104.460 usec  
 DE: 6.00 usec  
 TE: 298.2 K  
 D1: 2.00000000 sec  
 TDO: 1

===== CHANNEL f1 =====  
 NUC1: 1H  
 P1: 9.00 usec  
 PL1: -3.00 dB  
 SFO1: 300.1321009 MHz

F2 - Processing parameters  
 SI: 32768  
 SF: 300.130000 MHz  
 KHZ: EM  
 SSB: 0  
 LB: 0.30 Hz  
 GB: 0  
 PC: 1.00

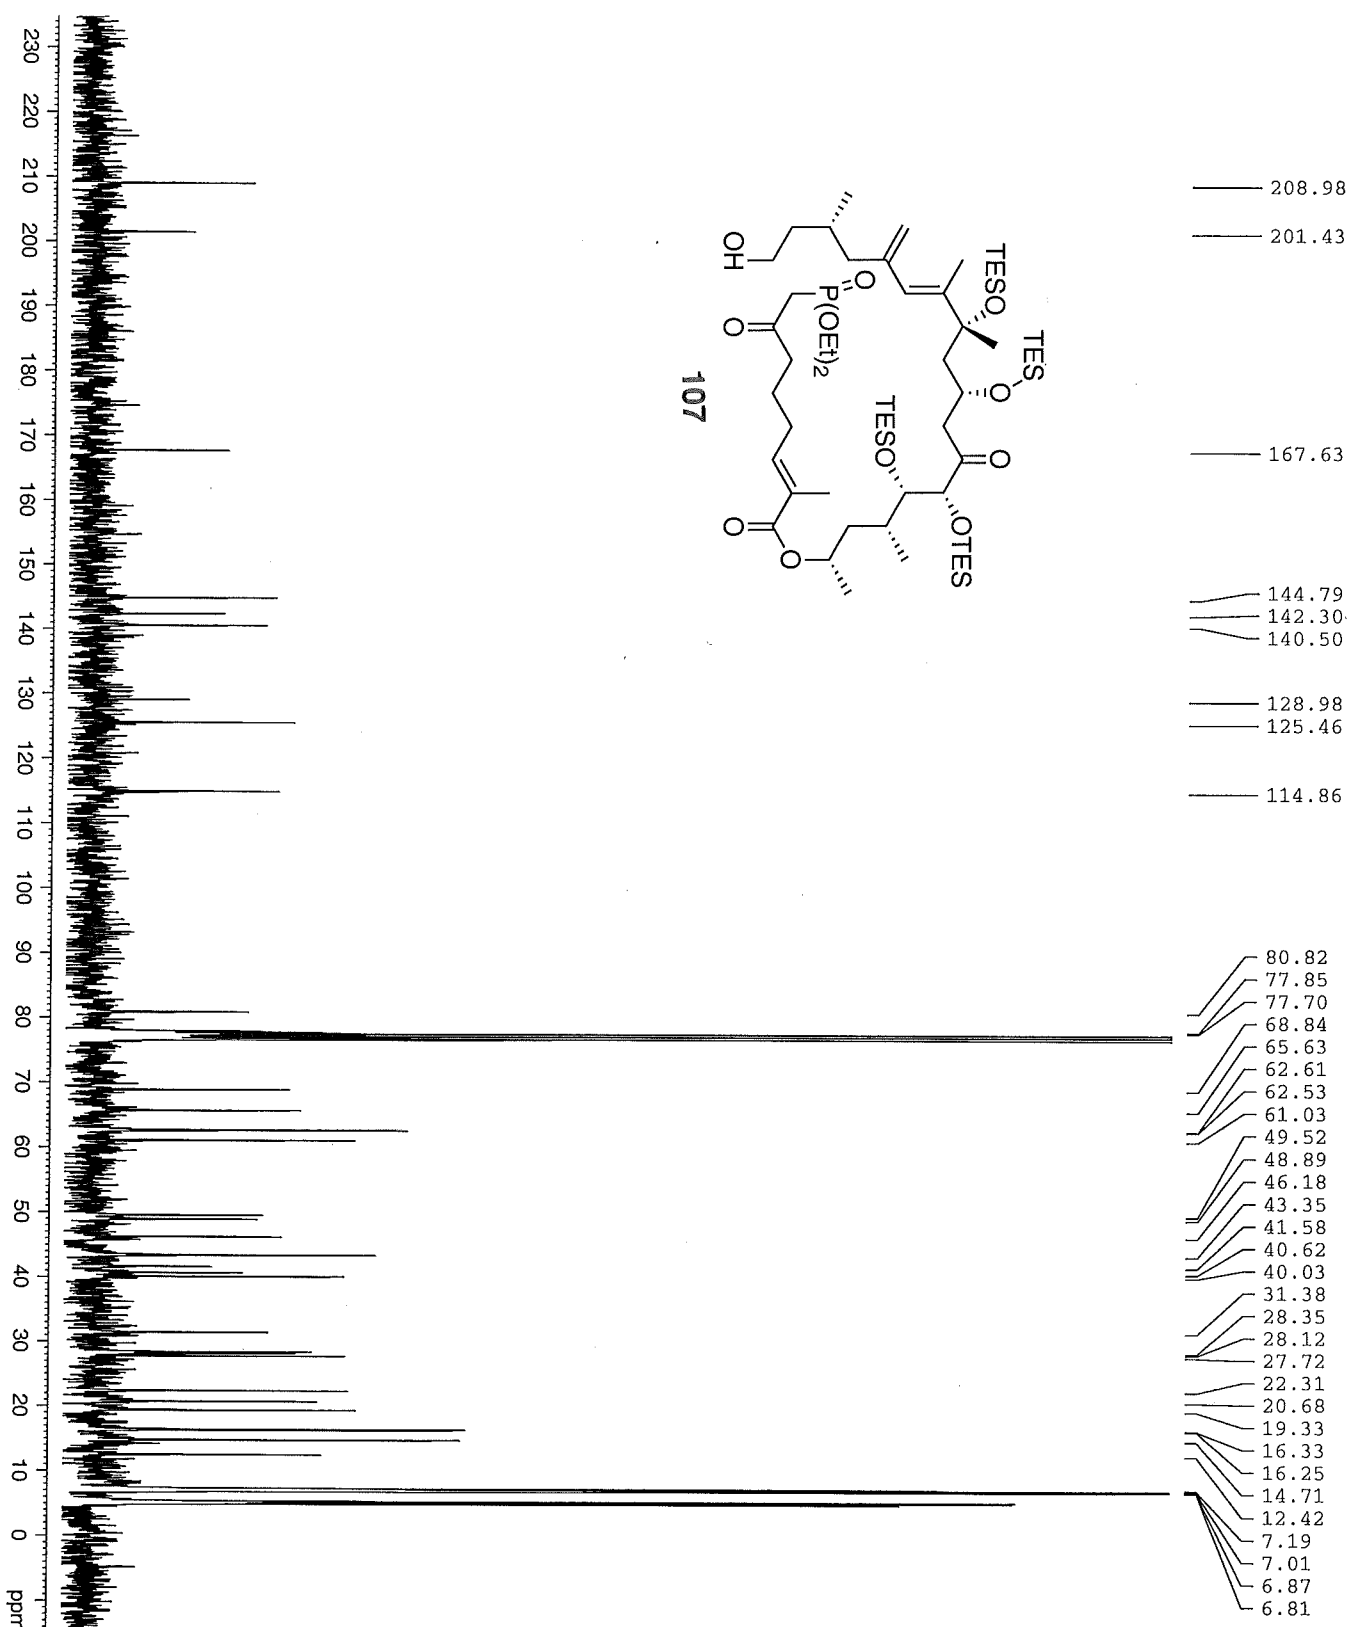

Current Data Parameters  
 NAME 8-18  
 EXPNO 4  
 PROCNO 1  
 DU /n  
 USER Liang

F2 - Acquisition Parameters  
 Date\_ 20080326  
 Time 14.25  
 INSTRUM DPX300  
 PROBHD 5 mm QNP 1H/1  
 PULPROG zgpg30  
 TD 65536  
 SOLVENT CDCl3  
 NS 529  
 DS 4  
 SWH 18832.393 Hz  
 FIDRES 0.287360 Hz  
 AQ 1.740308 sec  
 RG 9195.2  
 DW 26.550 usec  
 DE 6.00 usec  
 TE 298.2 K  
 D1 0.15000001 sec  
 d11 0.03000000 sec  
 DELTA 0.05000000 sec  
 TDO 1

==== CHANNEL F1 =====  
 NUC1 13C  
 P1 8.80 usec  
 PL1 -3.00 dB  
 SF01 75.4760505 MHz

==== CHANNEL F2 =====  
 CPDPRG2 waltz16  
 NUC2 1H  
 PCPD2 80.00 usec  
 PL2 -3.00 dB  
 PL12 17.55 dB  
 PL13 17.55 dB  
 SFO2 300.1312005 MHz

F2 - Processing Parameters  
 SI 32768  
 SF 75.4677490 MHz  
 WDW EM  
 SSB 0  
 LB 3.00 Hz  
 GB 0  
 PC 1.40

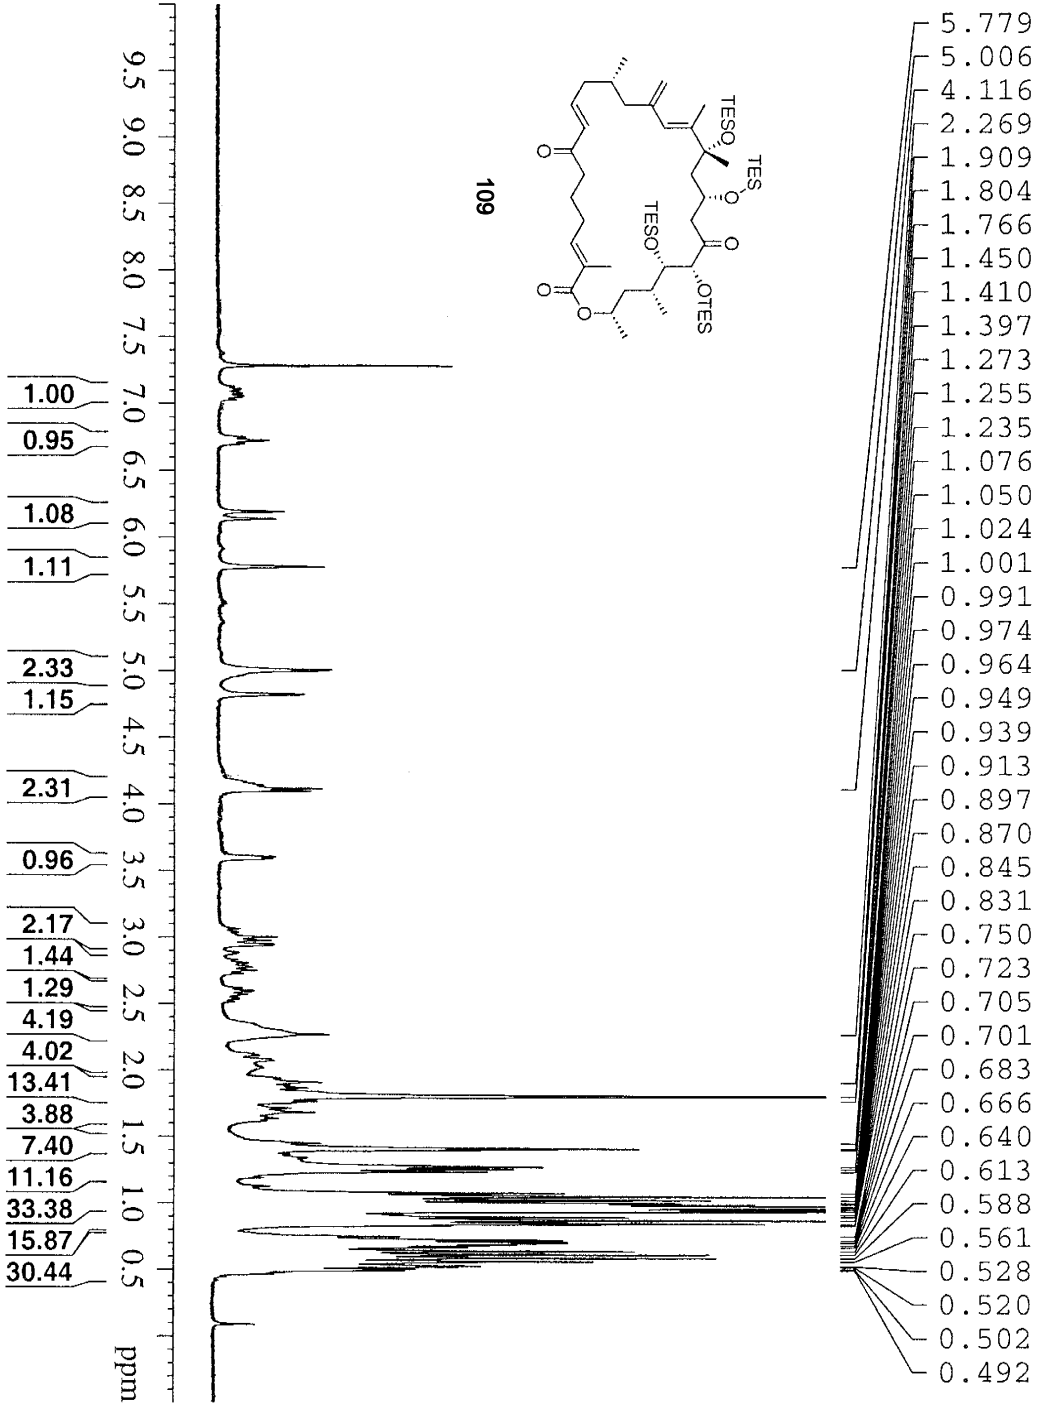

```

Current Data Parameters
NAME          F-18-2
EXPNO        2
PROCNO       1
DS           1
USERS
===== Acquisition Parameters
Date_        20080402
Time         14:11
INSTRUM      DPX11
PROBHD       5 mm QNP 1H/1
PULPROG      zg30
TD           32768
SOLVENTF1    CDCl3
NS           2
DS           2
SWH          4789.272 Hz
FIDRES       0.146157 Hz
AQ           3.4210291 sec
RG           104.400 usec
DE           6.00 usec
TE           298.2 K
D1           2.00000000 sec
TDC          1
===== CHANNEL f1 =====
NUC1         1H
P1           9.00 usec
PL1         -3.00 dB
SFO1         300.1321009 MHz
===== Processing parameters
SI           300.1300000 MHz
WDW          EM
SSB          0
LB           0.00 Hz
GB           0
PC           1.00
  
```





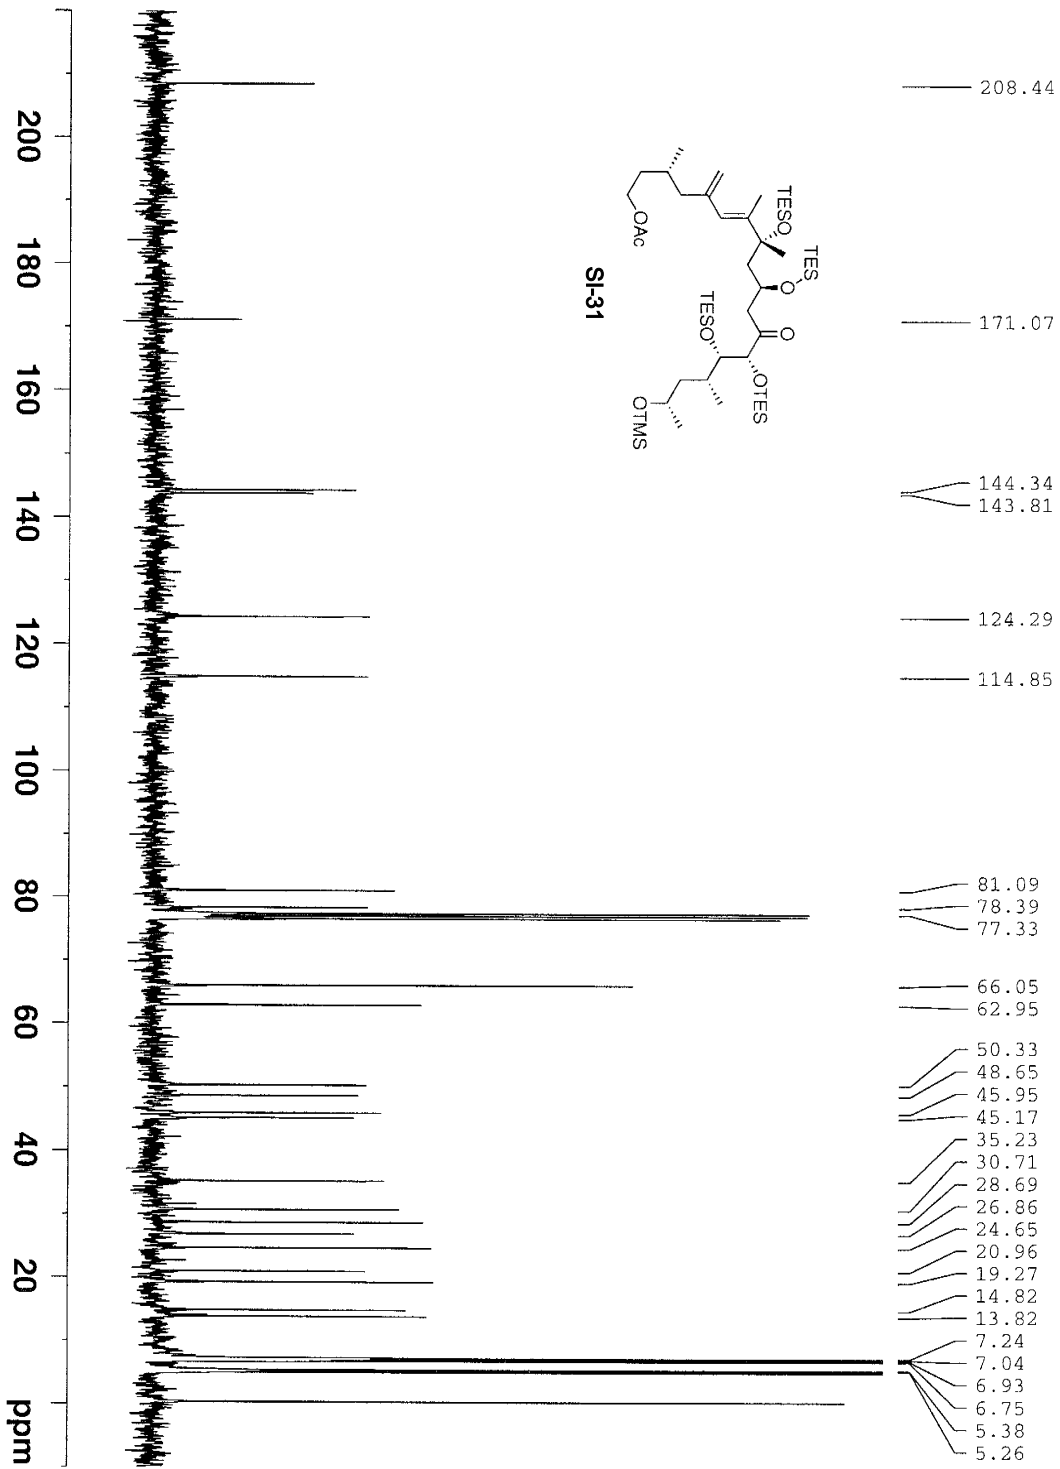

Current Data Parameters  
NAME 6493  
EXPNO 3  
PROCNO 1  
F2 - Acquisition Parameters  
Date\_ 20071014  
Time 21:15  
INSTRUM DPX300  
PROBHD 5 mm QNP 1H/1  
PULPROG zgpg30  
TD 65536  
SOLVENT CDC13  
NS 335  
DS 28  
SWH 18832.349 Hz  
FIDRES 0.2873668 Hz  
AQ 1.7400389 s  
RG 9195.2  
DE 26.550 us  
TE 298.2 K  
D1 0.15000001 s  
d11 0.03000000 s  
DELTA 0.05000000 s  
TD0 1  
===== CHANNEL f1 =====  
NUC1 13C  
P1 8.80 us  
PL1 -3.00 dB  
SFO1 75.4760505 MHz  
===== CHANNEL f2 =====  
CPDPRG2 waltz16  
NUC2 1H  
PCPD2 80.00 us  
PL2 -3.00 dB  
PL12 17.55 dB  
PL13 17.55 dB  
SF02 300.1312005 MHz  
F2 - Processing parameters  
SI 32768  
SE 75.4677490 MHz  
WPM EX  
SSB 0  
LB 3.00 MHz  
GB 0  
PC 1.40





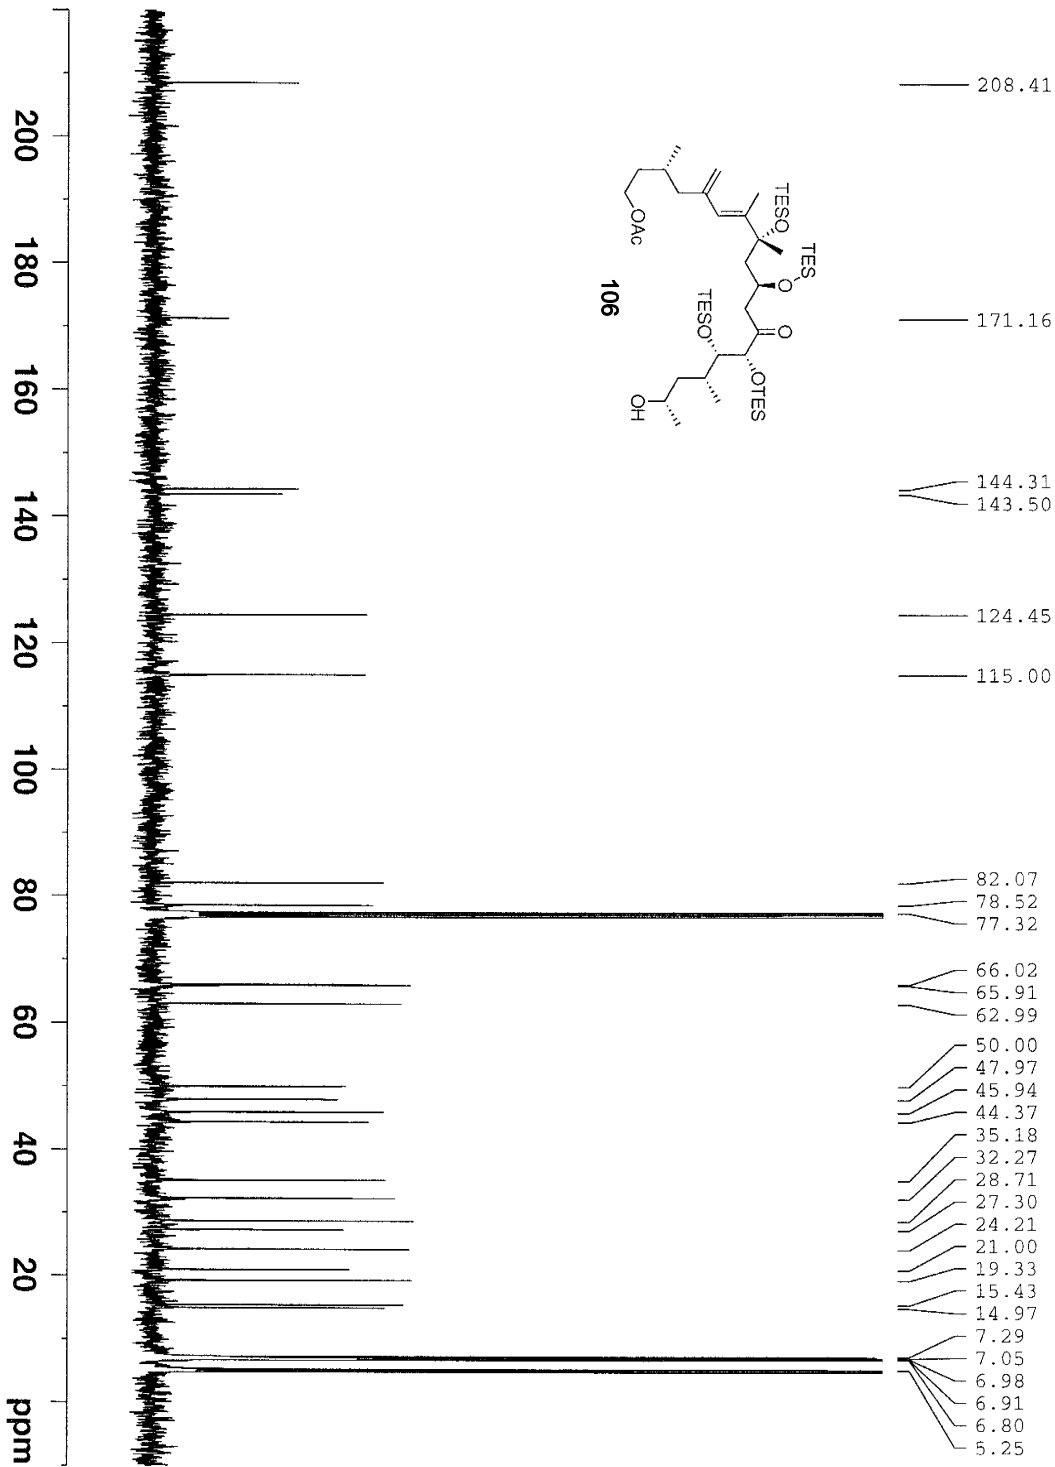

```

Current Data Parameters
NAME          6994
EXPNO         1
PROCNO        1
DU             /s
USER          Llang

F2 - Acquisition Parameters
Date_         20071017
Time          14.51
INSTRUM      DPX400
PROBHD       5 mm BBO BB-1H
PULPROG      zgpg30
TD            65536
SOLVENT      SOLVENT
NS            305
DS            4
SWH           26125.629 Hz
FIDRES        0.1383397 Hz
AQ            1.3042164 s
RG            4597.6
LW           19.900 us
DE            6.00 us
TE            299.2 K
D1            0.15000001 s
d11           0.03000000 s
DELTA        0.05000000 s
TD0           1

===== CHANNEL f1 =====
NUC1          13C
P1            7.88 us
PC1           3.08 dB
SFO1         100.5936991 MHz

===== CHANNEL f2 =====
CPDPRG2      waltz16
NUC2          1H
PCPD2        135.00 us
PL2          17.40 dB
PL12         17.40 dB
PL13         17.40 dB
SFO2         400.0116000 MHz

F2 - Processing parameters
SI            32768
SF            100.5825950 MHz
WDW           EM
SSS           0
GB            0
PC            1.40
  
```





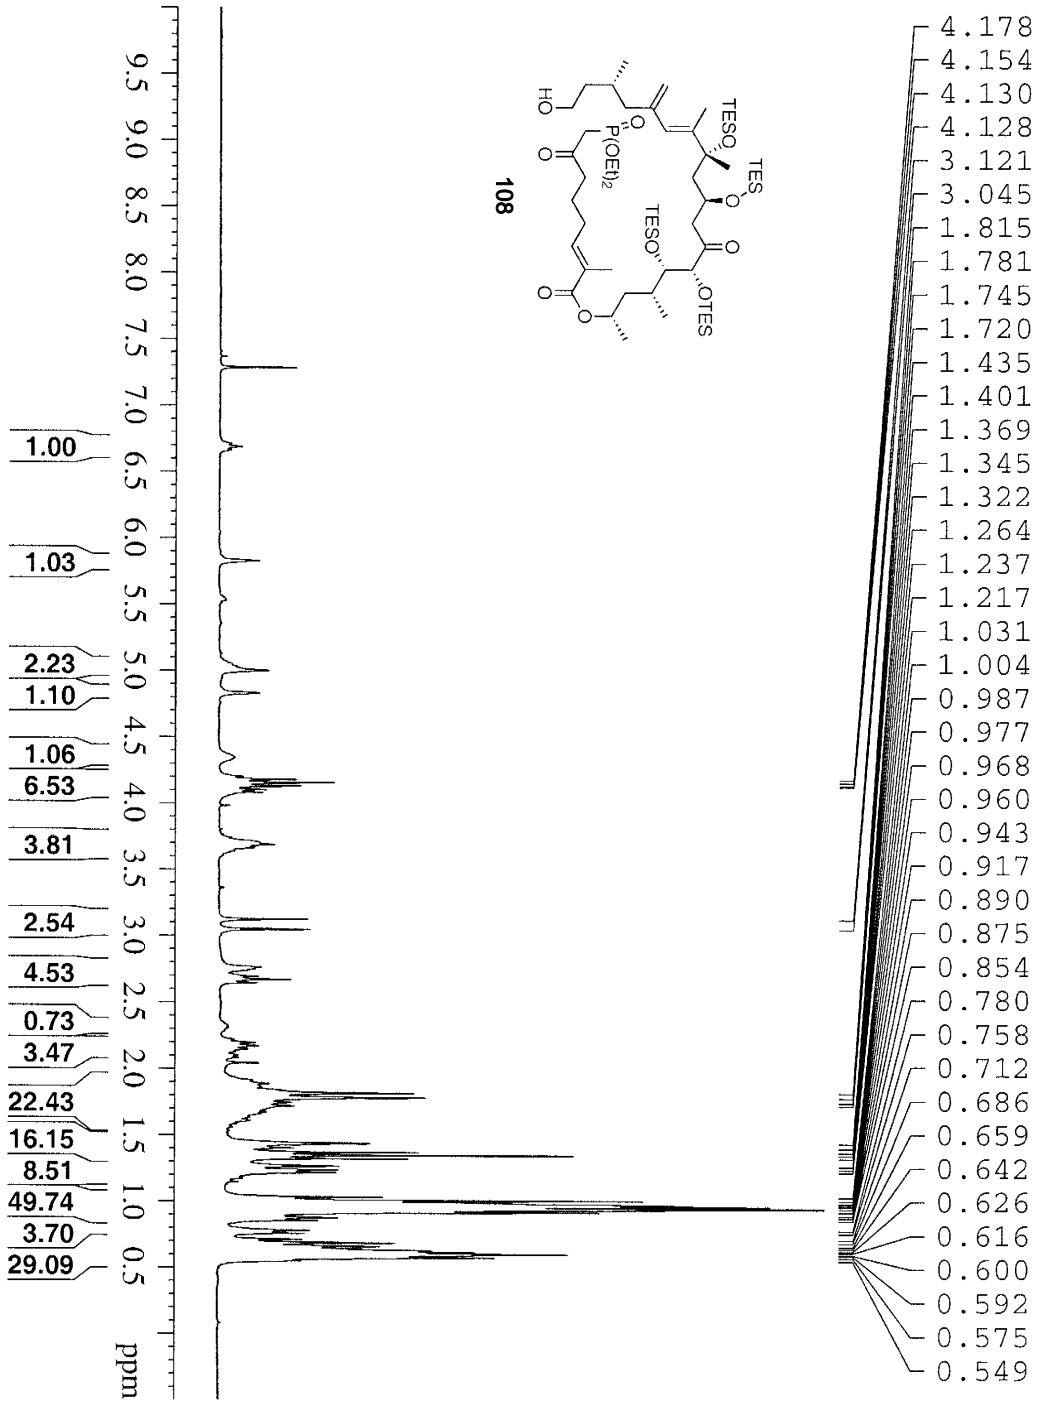

```

Current Data Parameters
NAME: 108
EXPNO: 6
PROCNO: 1
DU: 1
USER:
F2 - Acquisition Parameters
Date_: 20071021
Time: 18.19
INSTRUM: DSI300
PROBHD: 5 mm QNP 1H/13
PULPROG: zgpg30
TD: 32768
SOLVENT: CDCl3
NS: 20
DS: 2
SWH: 4789.372 Hz
FIDRES: 0.146157 Hz
AQ: 3.4210291 sec
RG: 655
AQ: 0.04100 usec
DE: 6.00 usec
TE: 298.2 K
D1: 2.00000000 sec
TD0: 1
===== CHANNEL f1 =====
NUC1: 13
P1: 9.00 usec
PL1: 0.00 dB
SFO1: 300.1321009 MHz
E2 - Processing parameters
SI: 32768
SF: 300.1320000 MHz
WDW: EM
SSB: 0
LB: 3.00 Hz
GB: 0
PC: 1.00
  
```



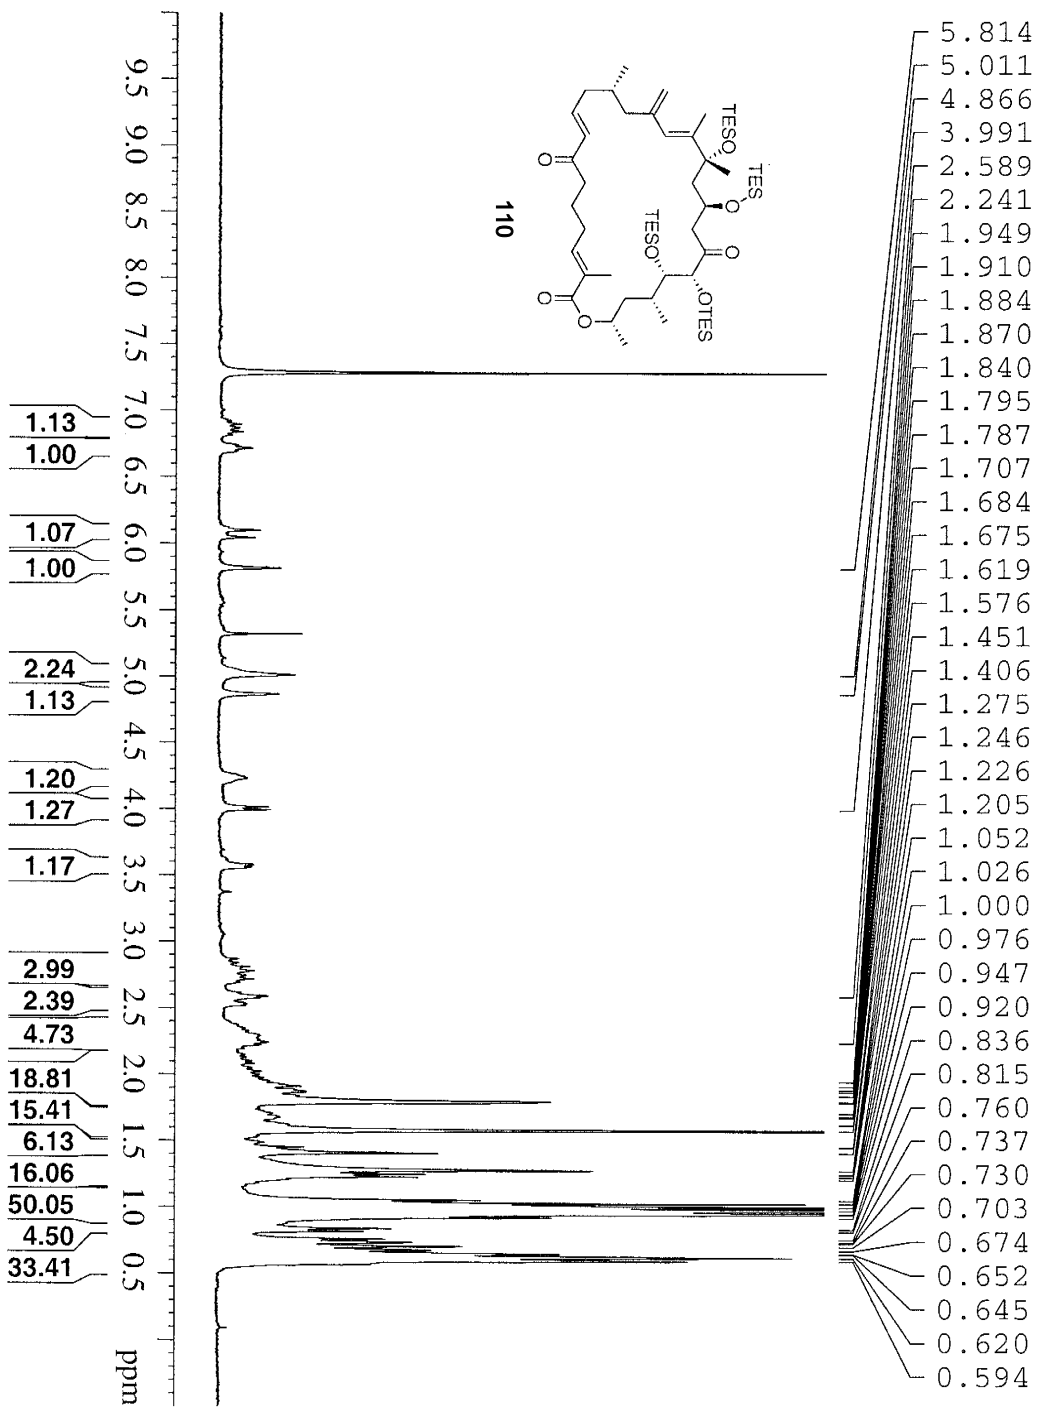

Current Data Parameters  
 EXPNO 6.71  
 PROCNO 1  
 DS 1  
 DE /h  
 USER Liany  
 F2 - Acquisition Parameters  
 Date\_ 20071021  
 Time 21.58  
 INSTRUM JNM-EX200  
 NUC1 13C  
 PULPROG zgpg30  
 TD 32768  
 SOLVENT CDCl3  
 NS 32  
 DS 2  
 SWH 4789.372 Hz  
 FIDRES 0.146157 Hz  
 AQ 3.421024 sec  
 DE 10.4400 usec  
 TE 298.2 K  
 D1 2.0000000 sec  
 T20 1

\*\*\*\*\* CHANNEL f1 \*\*\*\*\*  
 NUC1 13C  
 P1 9.00 usec  
 PL 0.00 dB  
 SFO1 300.132109 MHz

F2 - Processing parameters  
 SI 32768  
 SF 300.132109 MHz  
 MD 4  
 SSB 0  
 LB 0.30 Hz  
 GB 0  
 PC 1.00





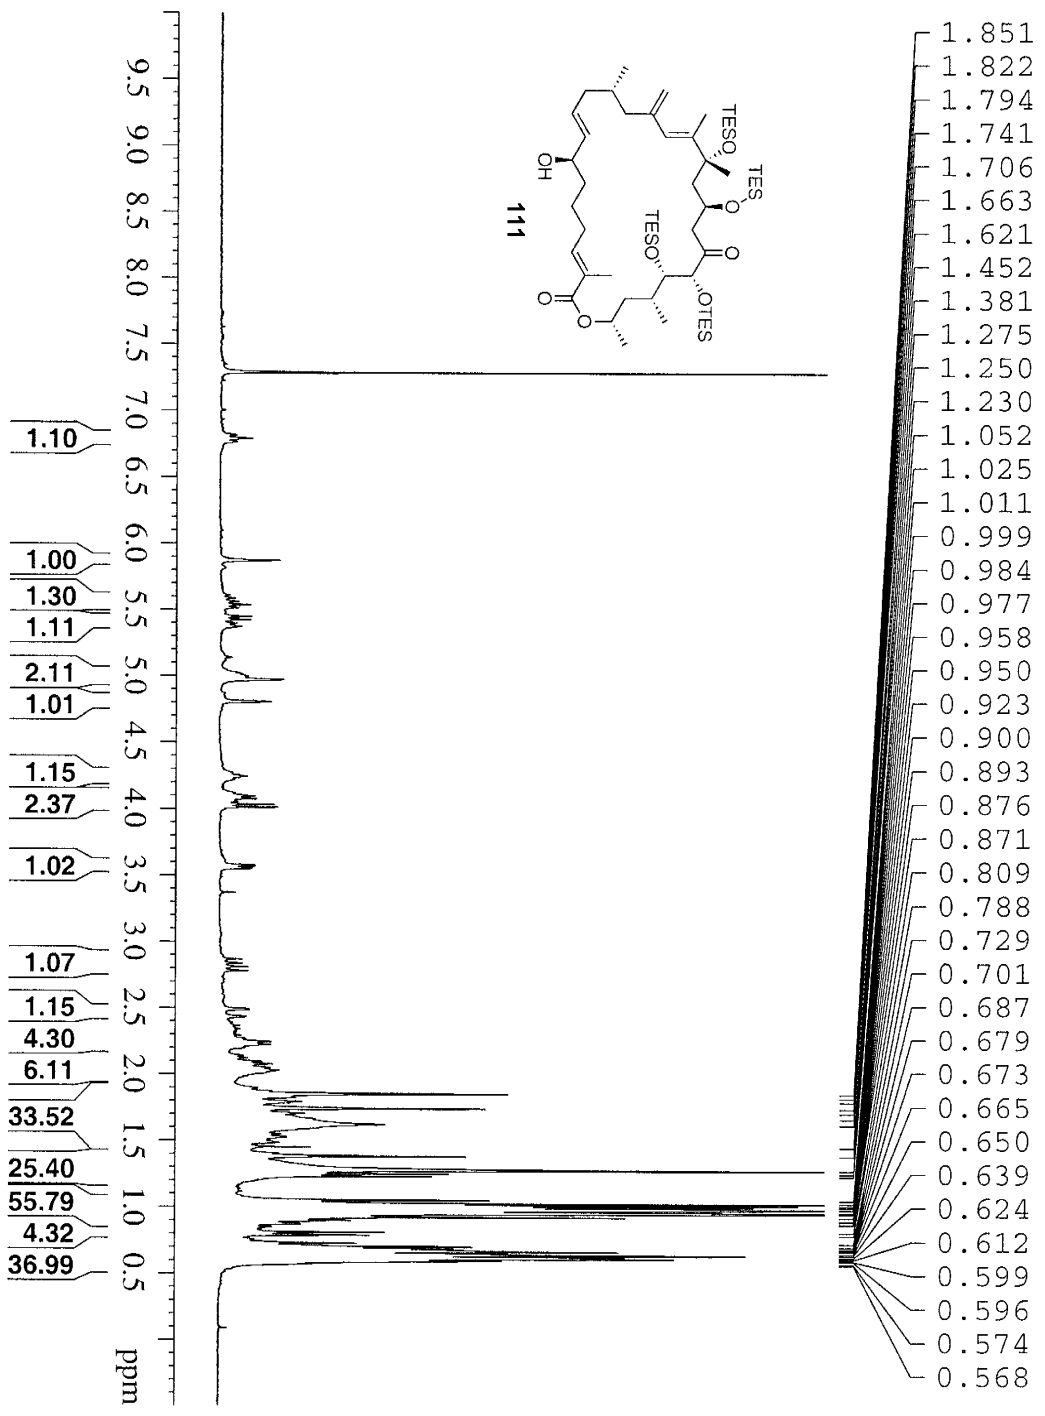

|       |
|-------|
| 1.851 |
| 1.822 |
| 1.794 |
| 1.741 |
| 1.706 |
| 1.663 |
| 1.621 |
| 1.452 |
| 1.381 |
| 1.275 |
| 1.250 |
| 1.230 |
| 1.052 |
| 1.025 |
| 1.011 |
| 0.999 |
| 0.984 |
| 0.977 |
| 0.958 |
| 0.950 |
| 0.923 |
| 0.900 |
| 0.893 |
| 0.876 |
| 0.871 |
| 0.809 |
| 0.788 |
| 0.729 |
| 0.701 |
| 0.687 |
| 0.679 |
| 0.673 |
| 0.665 |
| 0.650 |
| 0.639 |
| 0.624 |
| 0.612 |
| 0.599 |
| 0.596 |
| 0.574 |
| 0.568 |

```

Current Data Parameters
EXPNO 7-02
PROCNO 1
DU /n
USER
F2 - Acquisition Parameters
Date_ 20071024
Time 16.05
INSTRUM DPX300
PROBHD 5 mm QNP
PULPROG zgpg30
TD 32768
SOLVENT CDCl3
NS 32
DS 2
SWH 4789.272 Hz
FIDRES 0.146157 Hz
AQ 3.4210291 sec
RG 104.60
DE 6.00 usec
TE 296.2 K
D1 2.0000000 sec
D10 1
===== CHANNEL f1 =====
NUC1 1H
P1 9.00 usec
PL 0.00 dB
SFO1 300.1321009 MHz
F2 - Processing parameters
SI 32768
SF 300.130000 MHz
WDW EM
SSB 0
LB 0.30 Hz
GB 0
PC 1.00
  
```

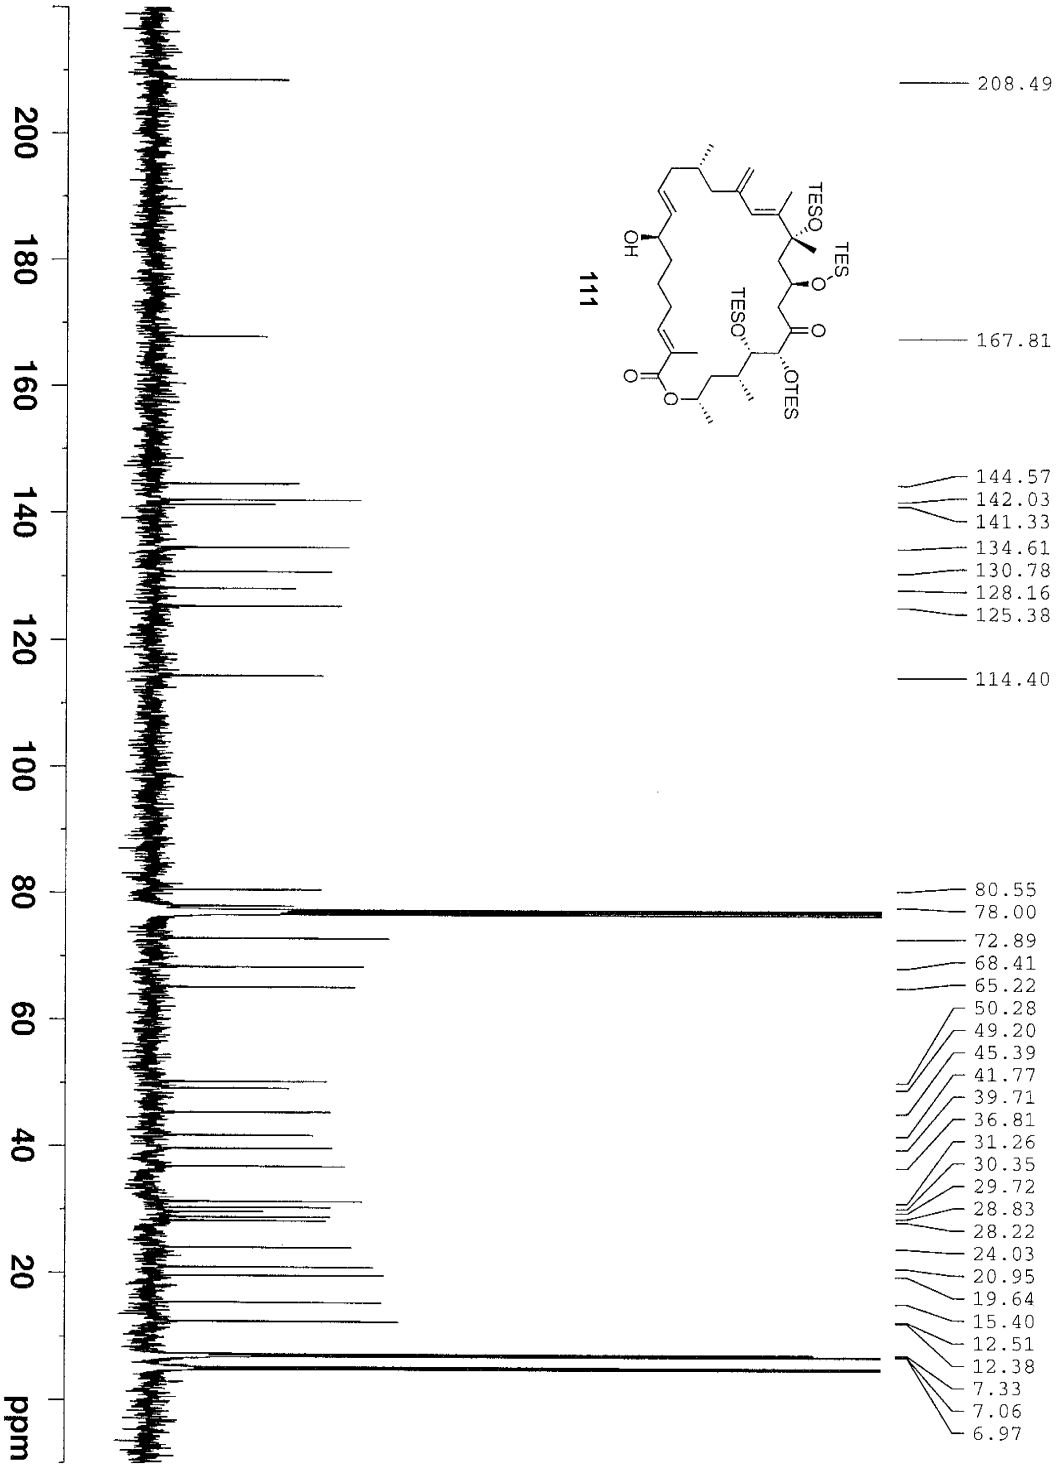

Current Data Parameters  
 NAME 7-11  
 EXPNO 3  
 PROCNO 1  
 F2 USER /n  
 USER /n  
 LANG

F2 - Acquisition Parameters  
 Date\_ 20071028  
 Time 19.33  
 INSTRUM DPM400  
 PROBH1 5 mm BBO BB-1H  
 PULPRG1 zgpg30  
 TD 65536  
 SOLVENT 115  
 NS 1  
 DS 1  
 SWH 25125.679 Hz  
 FIDRES 0.383387 Hz  
 AQ 1.3042164 sec  
 RG 5792.6  
 DW 19.900 usec  
 DE 6.00 usec  
 TE 299.2 K  
 D1 0.15000001 sec  
 d11 0.03000000 sec  
 DELTA 0.05000000 sec  
 TDO 1

===== CHANNEL f1 =====  
 NUC1 13C  
 P1 7.80 usec  
 PL1 -2.00 dB  
 SFO1 100.596951 MHz

===== CHANNEL f2 =====  
 CPDPRG2 waltz16  
 NUC2 1H  
 PCPD2 135.00 usec  
 PL2 17.40 dB  
 PL12 17.40 dB  
 PL13 17.40 dB  
 SFO2 400.011630 MHz

F2 - Processing parameters  
 S1 32768  
 SF 100.5825950 MHz  
 WDW EM  
 SSB 0  
 LB 3.00 Hz  
 GB 0  
 FC 1.40

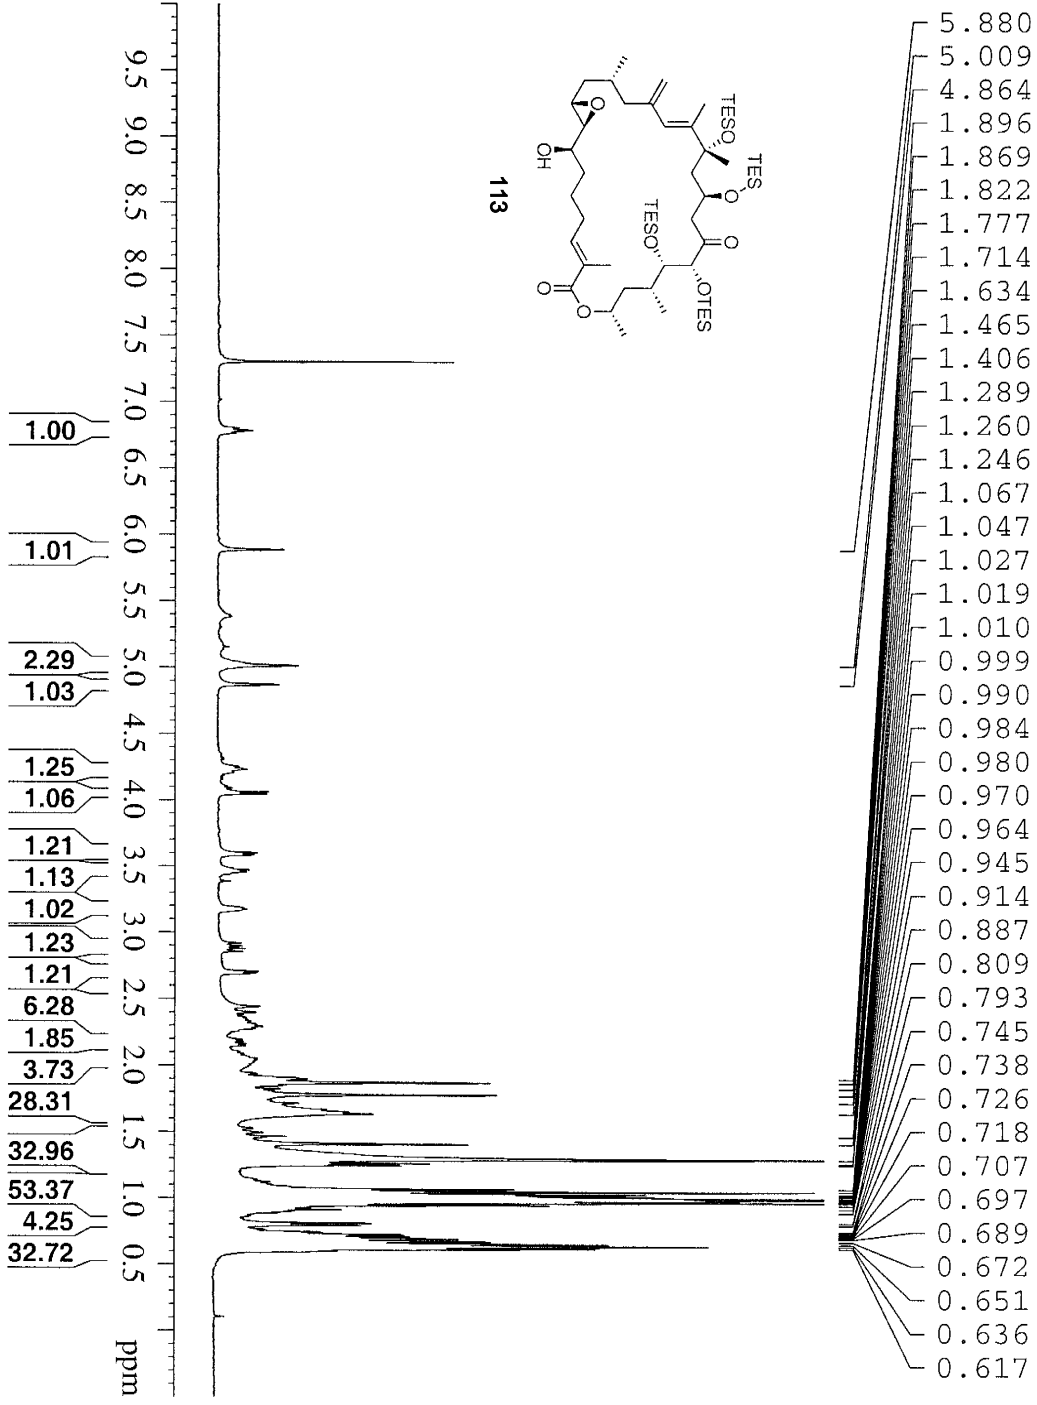

|       |       |       |       |       |       |       |       |       |       |       |       |       |       |       |       |       |       |       |       |       |       |       |       |       |       |       |       |       |       |       |       |       |       |       |       |       |       |       |       |       |
|-------|-------|-------|-------|-------|-------|-------|-------|-------|-------|-------|-------|-------|-------|-------|-------|-------|-------|-------|-------|-------|-------|-------|-------|-------|-------|-------|-------|-------|-------|-------|-------|-------|-------|-------|-------|-------|-------|-------|-------|-------|
| 5.880 | 5.009 | 4.864 | 1.896 | 1.869 | 1.822 | 1.777 | 1.714 | 1.634 | 1.465 | 1.406 | 1.289 | 1.260 | 1.246 | 1.067 | 1.047 | 1.027 | 1.019 | 1.010 | 0.999 | 0.990 | 0.984 | 0.980 | 0.970 | 0.964 | 0.945 | 0.914 | 0.887 | 0.809 | 0.793 | 0.745 | 0.738 | 0.726 | 0.718 | 0.707 | 0.697 | 0.689 | 0.672 | 0.651 | 0.636 | 0.617 |
|-------|-------|-------|-------|-------|-------|-------|-------|-------|-------|-------|-------|-------|-------|-------|-------|-------|-------|-------|-------|-------|-------|-------|-------|-------|-------|-------|-------|-------|-------|-------|-------|-------|-------|-------|-------|-------|-------|-------|-------|-------|

```

Current Data Parameters
EXPNO      7
PROCNO     1
F2         149
Date_      20071104
Time       14.41
INSTRUM    DRB400
PROBHD     5 mm BBO
PULPROG    zg30
TD         32768
SOLVENT    CDCl3
NS         32
DS         4
SWH         6410.256 Hz
FIDRES     0.195625 Hz
AQ         2.5559540 sec
RG         78.000
DE         6.00 usec
TE         299.2 K
D1         2.00000000 sec
TD0        1

***** CHANNEL f1 *****
NUC1       1H
P1         14.70 usec
PL1        0.00 dB
SFO1       400.0128001 MHz

F2 - Processing parameters
SI         32768
SF         400.010000 MHz
WDW        EM
SSB        0
LB         0.70 Hz
GB         0
SN         1.00
  
```

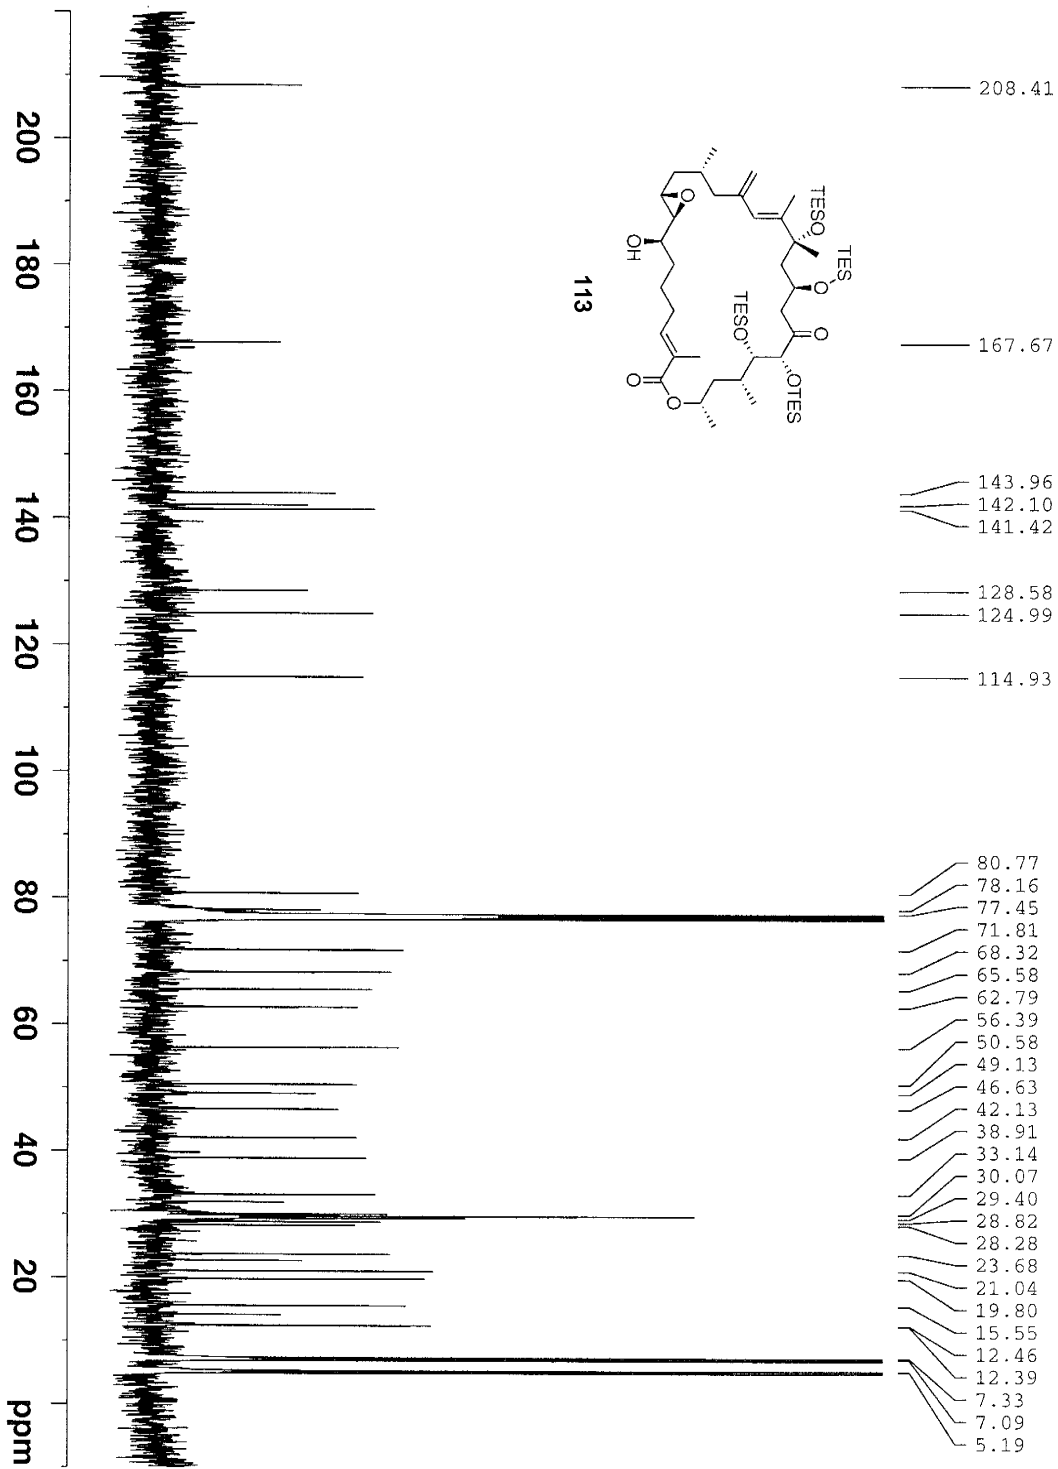

113

```

Current Data Parameters
NAME          7-12
EXPNO         2
PROCNO        1
F2 - Acquisition Parameters
Date_         20071104
Time          14.50
INSTRUM      DPX400
PROBHD       5 mm BBO BB-1H
PULPROG      zgpg30
TD            65536
SOLVENT      CDCl3
NS            4003
DS            4
SWH           26125.628 Hz
FIDRES        0.138387 Hz
AQ            1.3042164 sec
RG            4597.6
SW            19.900 us
DE            6.00 us
TE            299.2 K
D1            0.15000001 sec
d1:1          0.03000000 sec
DELTA        0.05000000 sec
TD0           1

===== CHANNEL f1 =====
NUC1          13C
P1            7.89 us
PL1           3.00 dB
SFO1         100.5938951 MHz

===== CHANNEL f2 =====
CPDPRG2      waltz16
NUC2          1H
PCPD2        135.00 us
PL2           17.40 dB
PL1:2        17.40 dB
PL1:3        17.40 dB
SFO2         400.0116000 MHz

F2 - Processing parameters:
SI            32768
SF            100.5825950 MHz
WDW           EM
SSB           0
GB            0
PC            1.40
  
```

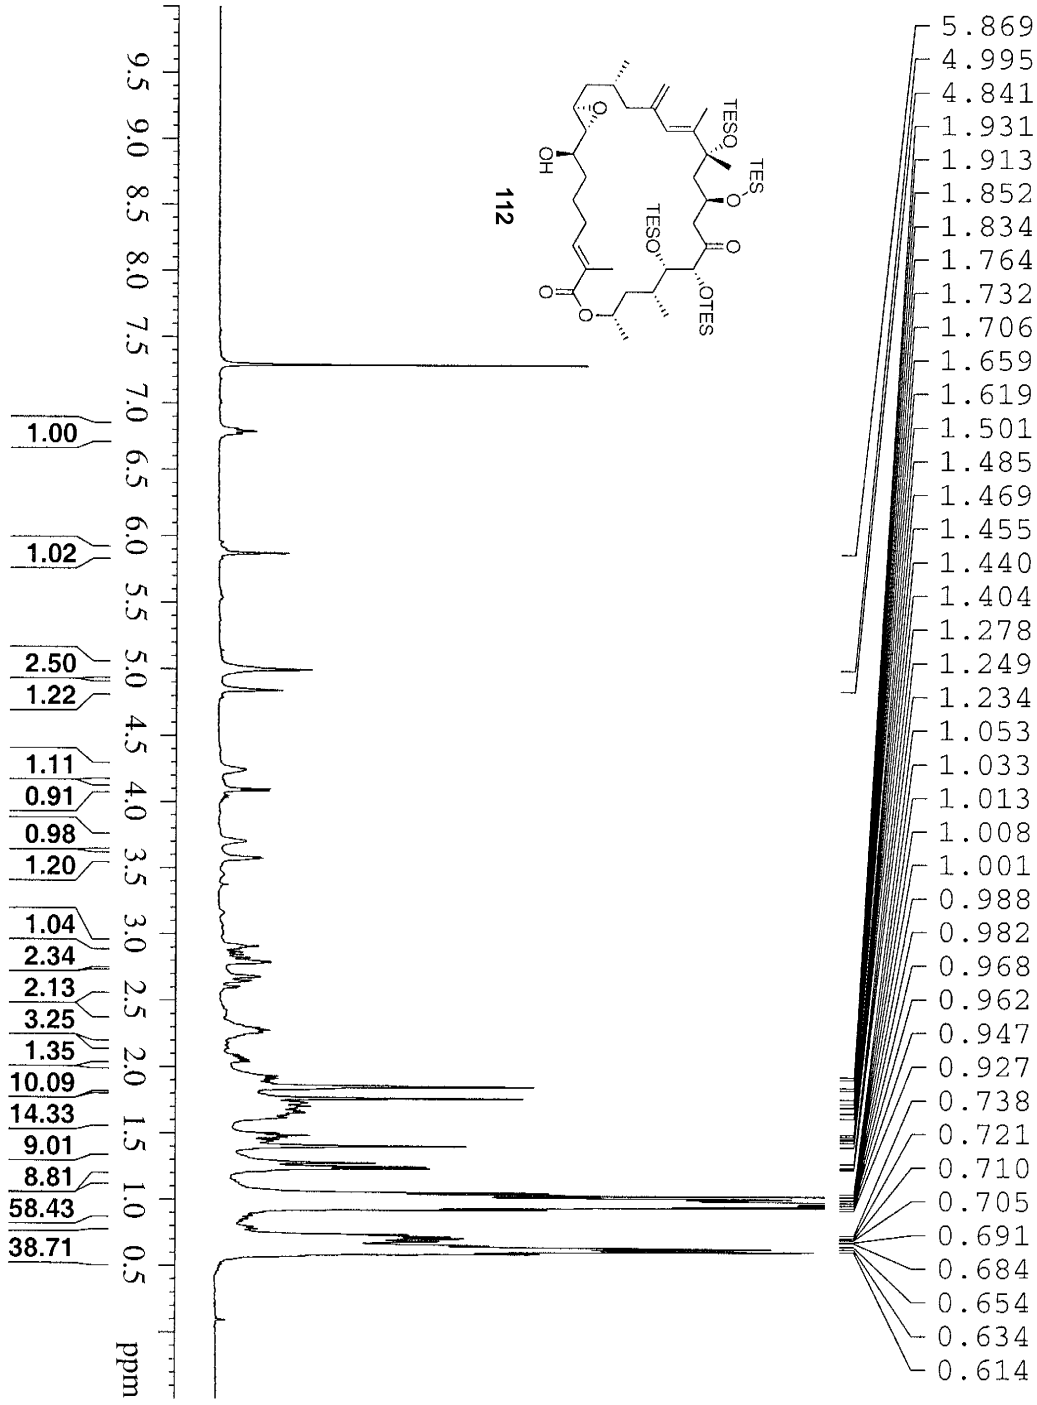

```

Current Data Parameters
NAME: 112
EXPNO: 3
PROCNO: 1
ESJ: /n
USJR: Liang
===== CHANNEL F1 =====
NUC1: 1H
P1: 14.70 usec
PI: 4.70 usec
SF01: 399.5528000 MHz
F2 - Processing parameters
SI: 32768
SF: 399.9530000 MHz
WDW: EM
SSB: 0
LB: 0.70 Hz
GB: 0
PC: 1.00

===== CHANNEL F2 =====
Date_: 20080411
Time: 19.14
INSTRUM: DPX400
PROBHD: 5 mm BBO
PULPROG: zg30
TD: 65536
SOLVENT: CDCl3
DE: 14
DS: 4
AQ: 6.410296 Hz
RG: 0.195625 Hz
FREQ: 2.5559540 sec
AQ: 78.000 usec
DE: 6.00 usec
TE: 298.2 K
C1: 2.00000000 sec
T10: 1
===== CHANNEL F3 =====
NUC1: 1H
P1: 14.70 usec
PI: 4.70 usec
SF01: 399.5528000 MHz
===== CHANNEL F4 =====
Date_: 20080411
Time: 19.14
INSTRUM: DPX400
PROBHD: 5 mm BBO
PULPROG: zg30
TD: 65536
SOLVENT: CDCl3
DE: 14
DS: 4
AQ: 6.410296 Hz
RG: 0.195625 Hz
FREQ: 2.5559540 sec
AQ: 78.000 usec
DE: 6.00 usec
TE: 298.2 K
C1: 2.00000000 sec
T10: 1

```

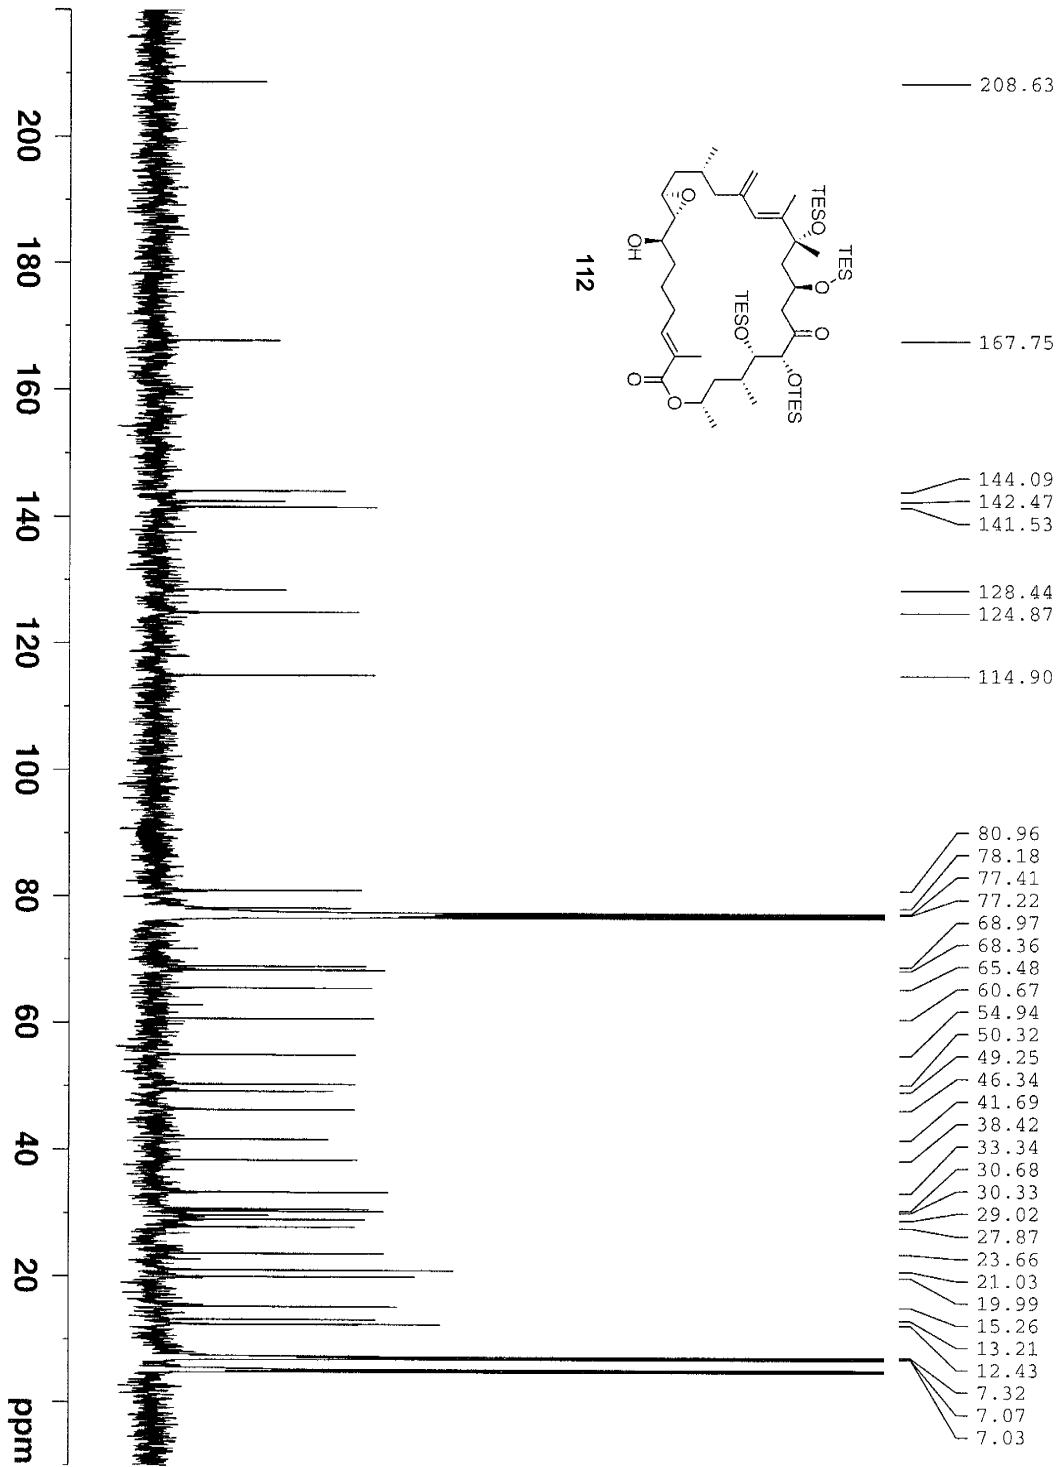

Current Data Parameters

|         |       |
|---------|-------|
| NAME    | 8-32  |
| EXPERNO | 3     |
| PROCNO  | 1     |
| DT      | 1/n   |
| USER    | Liang |

F2 - Acquisition Parameters

|          |                |
|----------|----------------|
| Date_    | 20080411       |
| Time     | 19.32          |
| INSTRUM  | DPX400         |
| PROBHD   | 5 mm BBO BB-1H |
| F1FLPRG3 | ZPGP30         |
| T2       | 65536          |
| SOLVENT  |                |
| NS       | 4030           |
| DS       | 4              |
| SWH      | 25125.629 Hz   |
| FIDRES   | 0.383357 Hz    |
| AQ       | 1.3042164 sec  |
| RG       | 16384          |
| DW       | 15.900 usec    |
| DE       | 6.00 usec      |
| TE       | 298.2 K        |
| D1       | 0.15000001 sec |
| D1.1     | 0.03000000 sec |
| DELTA    | 0.05000000 sec |
| TDC      | 1              |

==== CHANNEL F1 =====

|      |                 |
|------|-----------------|
| NUC1 | 13C             |
| F1   | 7.80 usec       |
| P1   | -3.00 dB        |
| SFO1 | 100.5785700 MHz |

==== CHANNEL F2 =====

|         |                 |
|---------|-----------------|
| CPDPRG2 | waltz16         |
| NUC2    | 1H              |
| PCPD2   | 135.00 usec     |
| PL2     | 17.40 dB        |
| PL12    | 17.40 dB        |
| PL13    | 17.40 dB        |
| SFO2    | 399.9516000 MHz |

F2 - Processing Parameters

|     |                 |
|-----|-----------------|
| SF  | 32768           |
| SR  | 100.5675080 MHz |
| WDW | EM              |
| SSB | 0               |
| GB  | 0               |
| FC  | 1.40            |

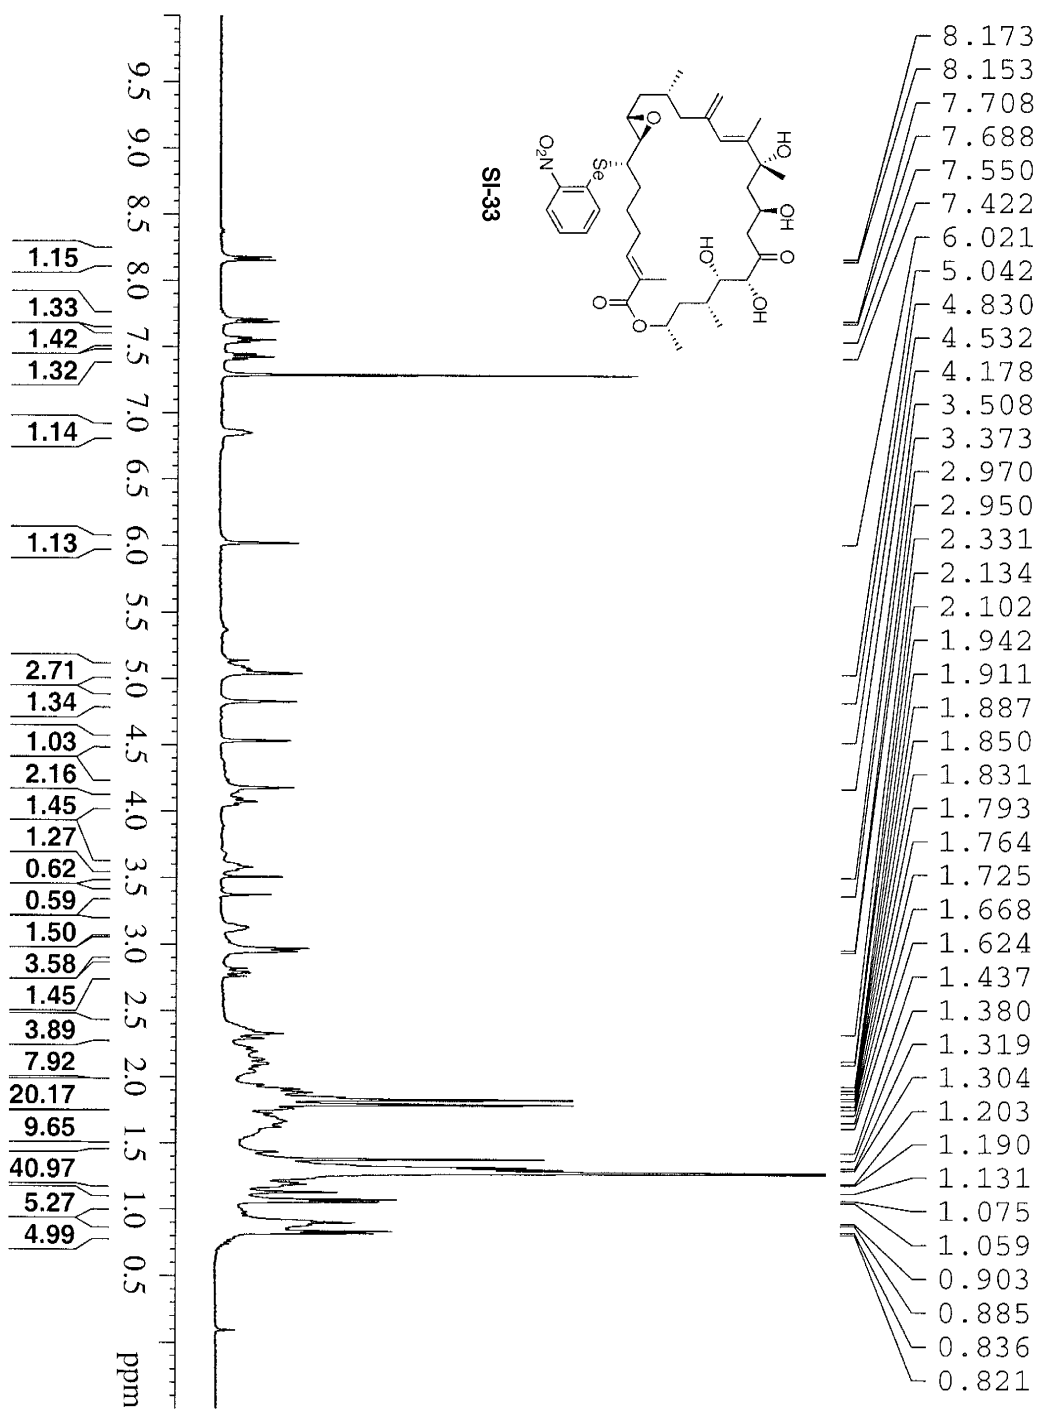

Current Data Parameters  
 Name: SI-33  
 EXNO: 1  
 PROCN: 2  
 DS: 1  
 USER: Liang

F2 - Acquisition Parameters  
 Date\_: 20080313  
 Time: 17.13  
 P1: 0.2400  
 P2: 0.1000  
 P3: 0.1000  
 P4: 0.1000  
 P5: 0.1000  
 P6: 0.1000  
 P7: 0.1000  
 P8: 0.1000  
 P9: 0.1000  
 P10: 0.1000  
 P11: 0.1000  
 P12: 0.1000  
 P13: 0.1000  
 P14: 0.1000  
 P15: 0.1000  
 P16: 0.1000  
 P17: 0.1000  
 P18: 0.1000  
 P19: 0.1000  
 P20: 0.1000  
 P21: 0.1000  
 P22: 0.1000  
 P23: 0.1000  
 P24: 0.1000  
 P25: 0.1000  
 P26: 0.1000  
 P27: 0.1000  
 P28: 0.1000  
 P29: 0.1000  
 P30: 0.1000  
 P31: 0.1000  
 P32: 0.1000  
 P33: 0.1000  
 P34: 0.1000  
 P35: 0.1000  
 P36: 0.1000  
 P37: 0.1000  
 P38: 0.1000  
 P39: 0.1000  
 P40: 0.1000  
 P41: 0.1000  
 P42: 0.1000  
 P43: 0.1000  
 P44: 0.1000  
 P45: 0.1000  
 P46: 0.1000  
 P47: 0.1000  
 P48: 0.1000  
 P49: 0.1000  
 P50: 0.1000  
 P51: 0.1000  
 P52: 0.1000  
 P53: 0.1000  
 P54: 0.1000  
 P55: 0.1000  
 P56: 0.1000  
 P57: 0.1000  
 P58: 0.1000  
 P59: 0.1000  
 P60: 0.1000  
 P61: 0.1000  
 P62: 0.1000  
 P63: 0.1000  
 P64: 0.1000  
 P65: 0.1000  
 P66: 0.1000  
 P67: 0.1000  
 P68: 0.1000  
 P69: 0.1000  
 P70: 0.1000  
 P71: 0.1000  
 P72: 0.1000  
 P73: 0.1000  
 P74: 0.1000  
 P75: 0.1000  
 P76: 0.1000  
 P77: 0.1000  
 P78: 0.1000  
 P79: 0.1000  
 P80: 0.1000  
 P81: 0.1000  
 P82: 0.1000  
 P83: 0.1000  
 P84: 0.1000  
 P85: 0.1000  
 P86: 0.1000  
 P87: 0.1000  
 P88: 0.1000  
 P89: 0.1000  
 P90: 0.1000  
 P91: 0.1000  
 P92: 0.1000  
 P93: 0.1000  
 P94: 0.1000  
 P95: 0.1000  
 P96: 0.1000  
 P97: 0.1000  
 P98: 0.1000  
 P99: 0.1000  
 P100: 0.1000

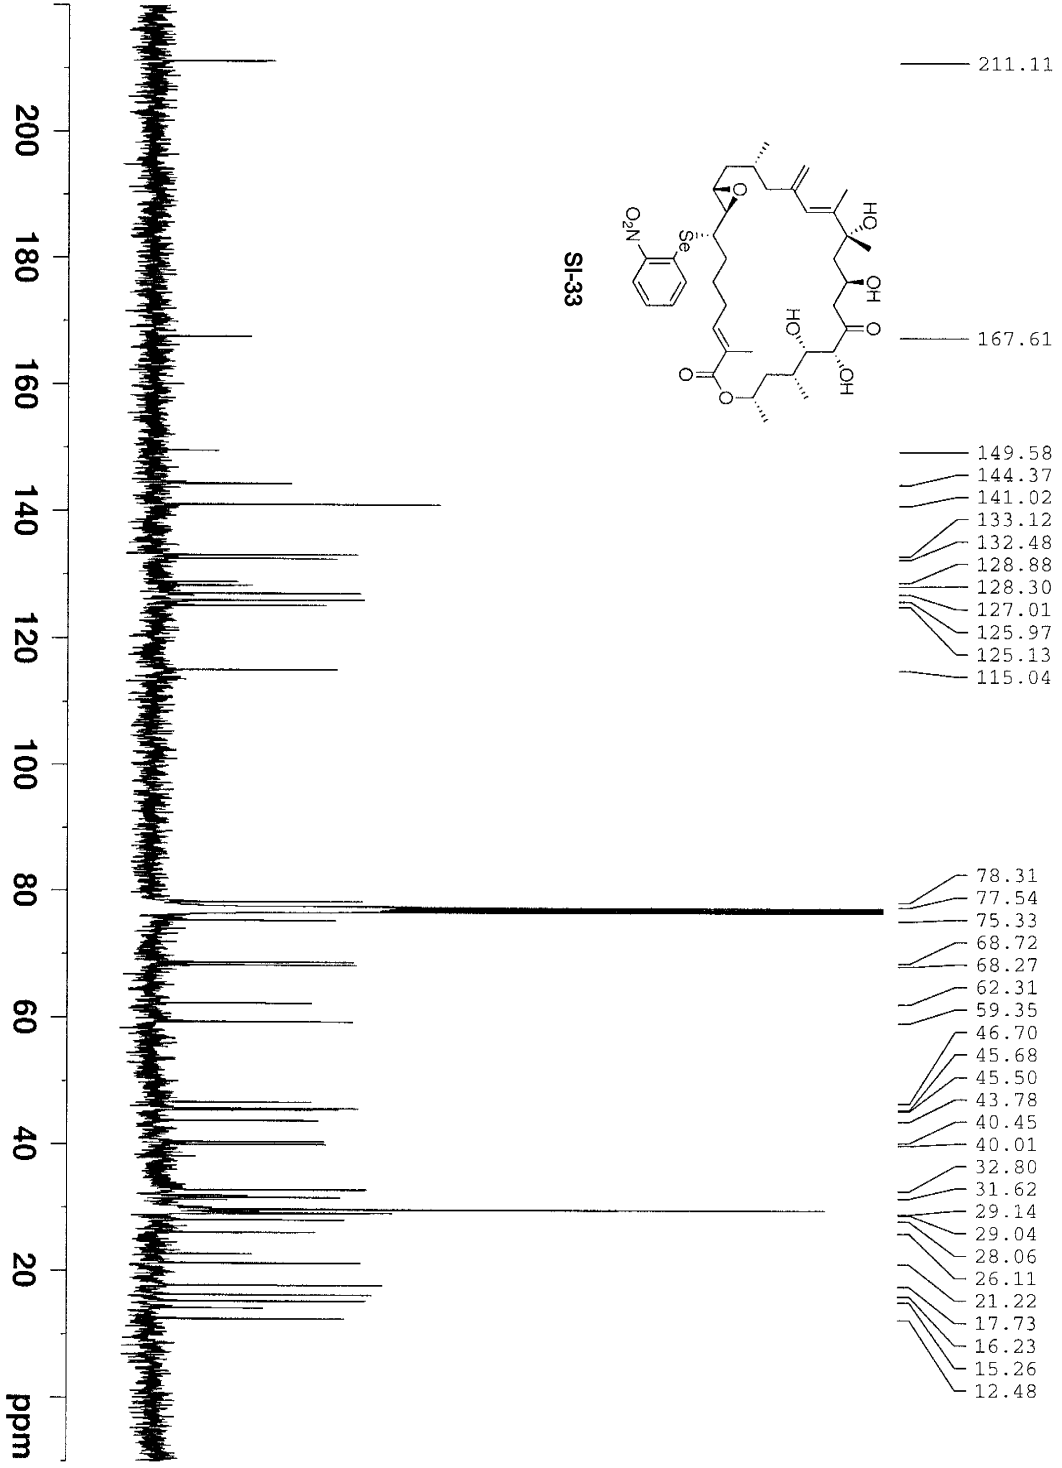

- 211.11
- 167.61
- 149.58
- 144.37
- 141.02
- 133.12
- 132.48
- 128.88
- 128.30
- 127.01
- 125.97
- 125.13
- 115.04
- 78.31
- 77.54
- 75.33
- 68.72
- 68.27
- 62.31
- 59.35
- 46.70
- 45.68
- 45.50
- 43.78
- 40.45
- 40.01
- 32.80
- 31.62
- 29.14
- 29.04
- 28.06
- 26.11
- 21.22
- 17.73
- 16.23
- 15.26
- 12.48

Current Data Parameters  
 NAME 7-94  
 EXNO 1  
 PROCNO 4  
 DV /n  
 USER Liang

F2 - Acquisition Parameters  
 Date\_ 20080313  
 Time 17.32  
 INSTRUM DPK405  
 PROBD 5 mm BBO-BB-1H  
 PULPROG zgpg30  
 SOLVENT g5558  
 NS 4199  
 DS 4  
 SWH 25125.629 Hz  
 FIDRES 0.381387 Hz  
 AQ 1.3042164 sec  
 RG 16384  
 DW 19.900 usec  
 DE 6.00 usec  
 TE 298.2 K  
 D1 0.15000001 sec  
 D11 0.03000000 sec  
 DELTA 0.05000000 sec  
 TD0 1

==== CHANNEL F1 =====  
 NUC1 13C  
 P1 7.00 usec  
 PL1 -3.00 dB  
 SFO1 100.5785700 MHz

==== CHANNEL F2 =====  
 CPDPRG2 waltz16  
 NUC2 1H  
 PCPD2 135.00 usec  
 PL2 17.40 dB  
 PL12 17.40 dB  
 PL13 17.40 dB  
 SFO2 399.9516000 MHz

F2 - Processing parameters  
 S1 32768  
 SF 100.5675880 MHz  
 WDM 0  
 SSB 0  
 GB 3.00 Hz  
 PC 1.40



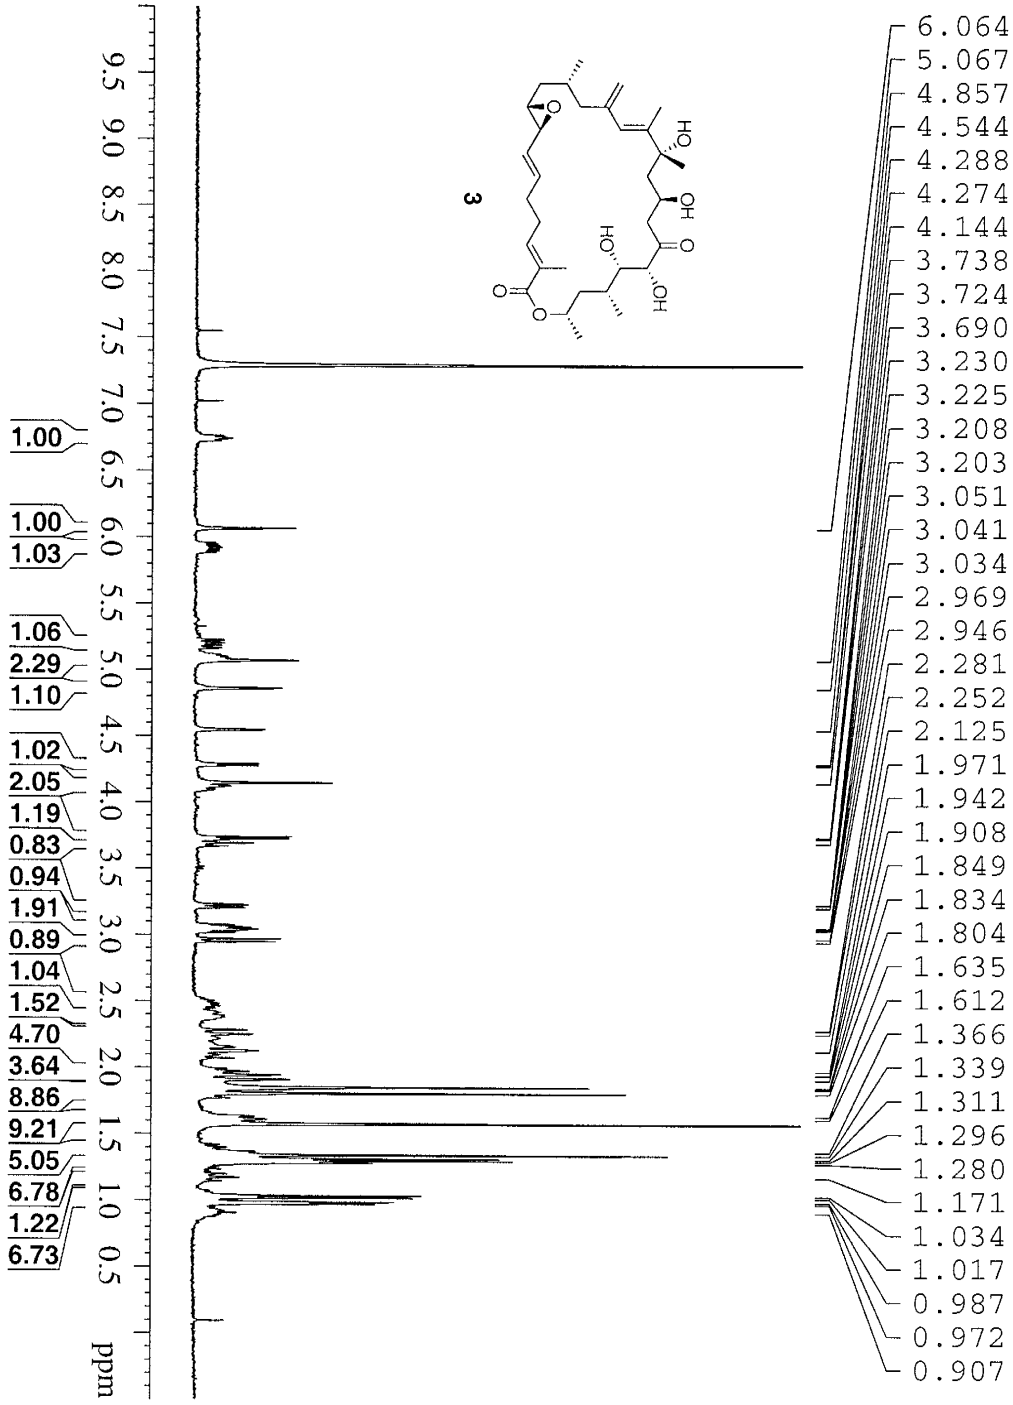

```

Current Data Parameters
Date_ 20080417
Time 22.15
EXPNO 1
PROCNO 1
PROBHD 5 mm BBO
PULPROG zgpg30
SOLVENT CPC13
NS 72
DS 2
SWH 6410.256 Hz
FIDRES 0.195635 Hz
AQ 2.555940 sec
RG 784.00
DE 784.00 usec
TE 298.2 K
D1 2.00000000 sec
TD0 1

===== CHANNEL f1 =====
NUC1 1H
P1 14.70 usec
PL 0.00 dB
SFO1 399.9528000 MHz

F2 - Processing parameters
SI 32768
WDW EM
SSB 0
LB 0
GB 0
PC 1.00
  
```

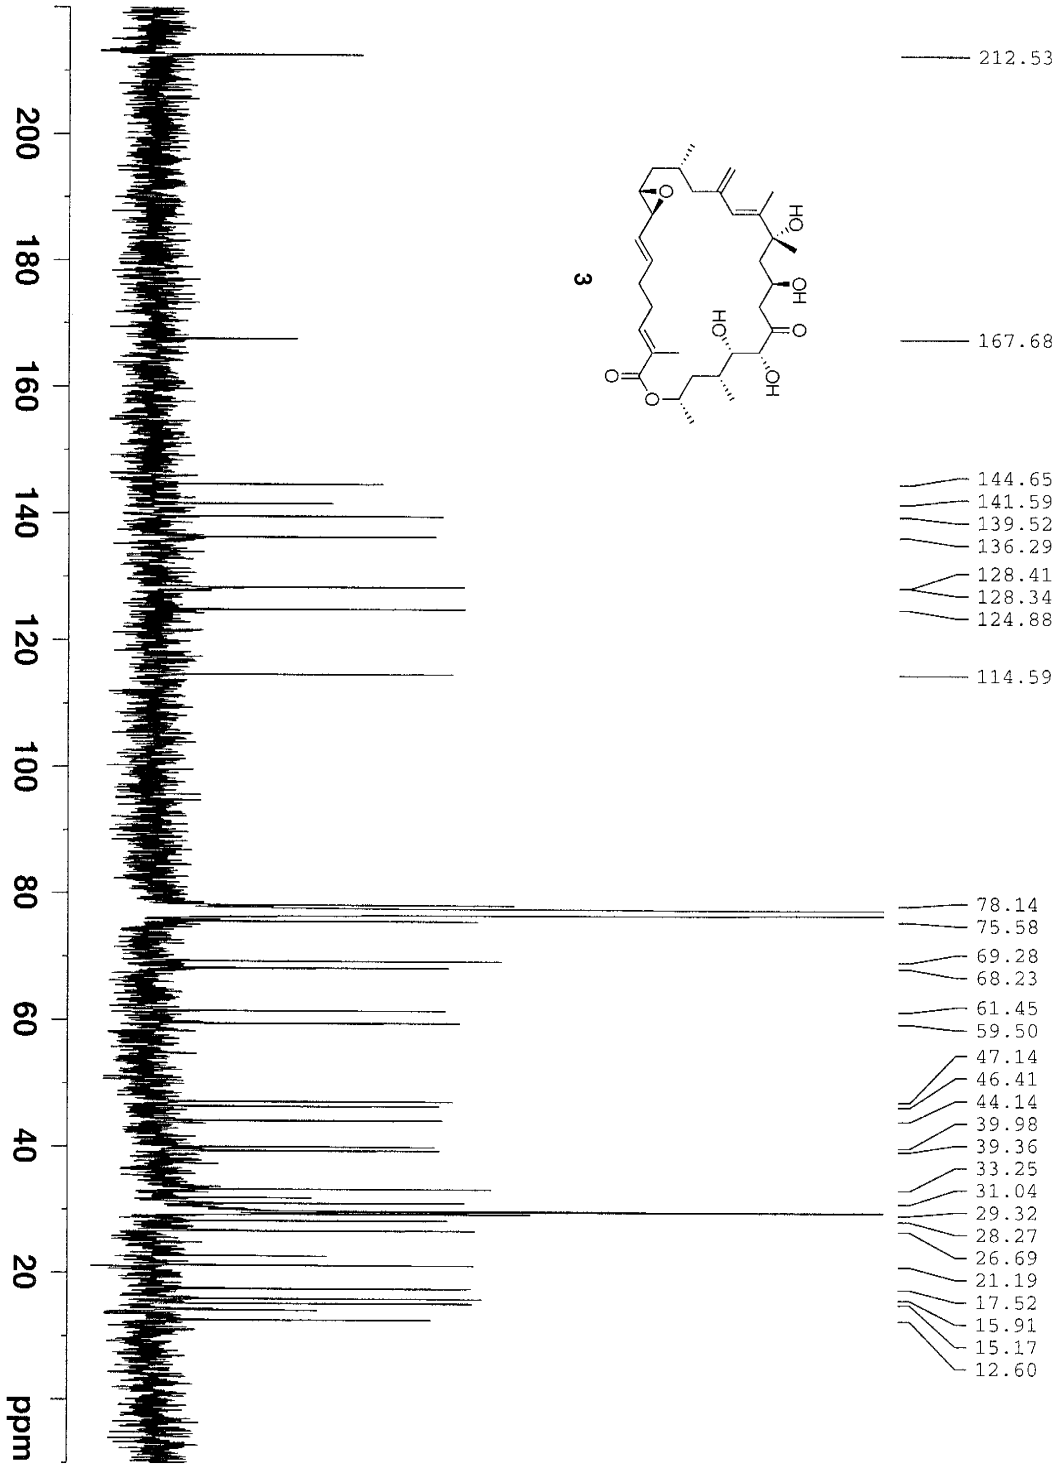

```

Current Data Parameters
NAME          7-97
EXPNO         1
PROCNO        1
DU             /-
USER          Liang

F2 - Acquisition Parameters
Date_         20080313
Time          7.57
INSTRUM      DPX400
PROBHD       5 mm BBO BB-1H
PULPROG      zgpg30
TD            65536
SOLVENT      22500
NS            2500
DS            4
SWH           25125.629 Hz
FIDRES        0.393387 Hz
AQ            1.3082164 s
RG            5792.6
DR            19.500 us
DE            6.00 us
TE            298.2 K
D1            0.15000001 s
d11           0.03000000 s
DELTA        0.05000000 s
TDC           1

===== CHANNEL f1 =====
NUC1          13C
P1            7.80 us
PL1          -3.00 dB
SFO1         100.5785700 MHz

===== CHANNEL f2 =====
CPDPRG2      waltz16
NUC2          1H
PCPD2        135.00 us
PL2          17.40 dB
PL12         17.40 dB
PL13         17.40 dB
SFO2         399.9516000 MHz

F2 - Processing parameters
SI            32768
SF           100.5675080 MHz
WDW          EM
SSB          3
LB           3.00 Hz
GB           0
PC           1.40
  
```

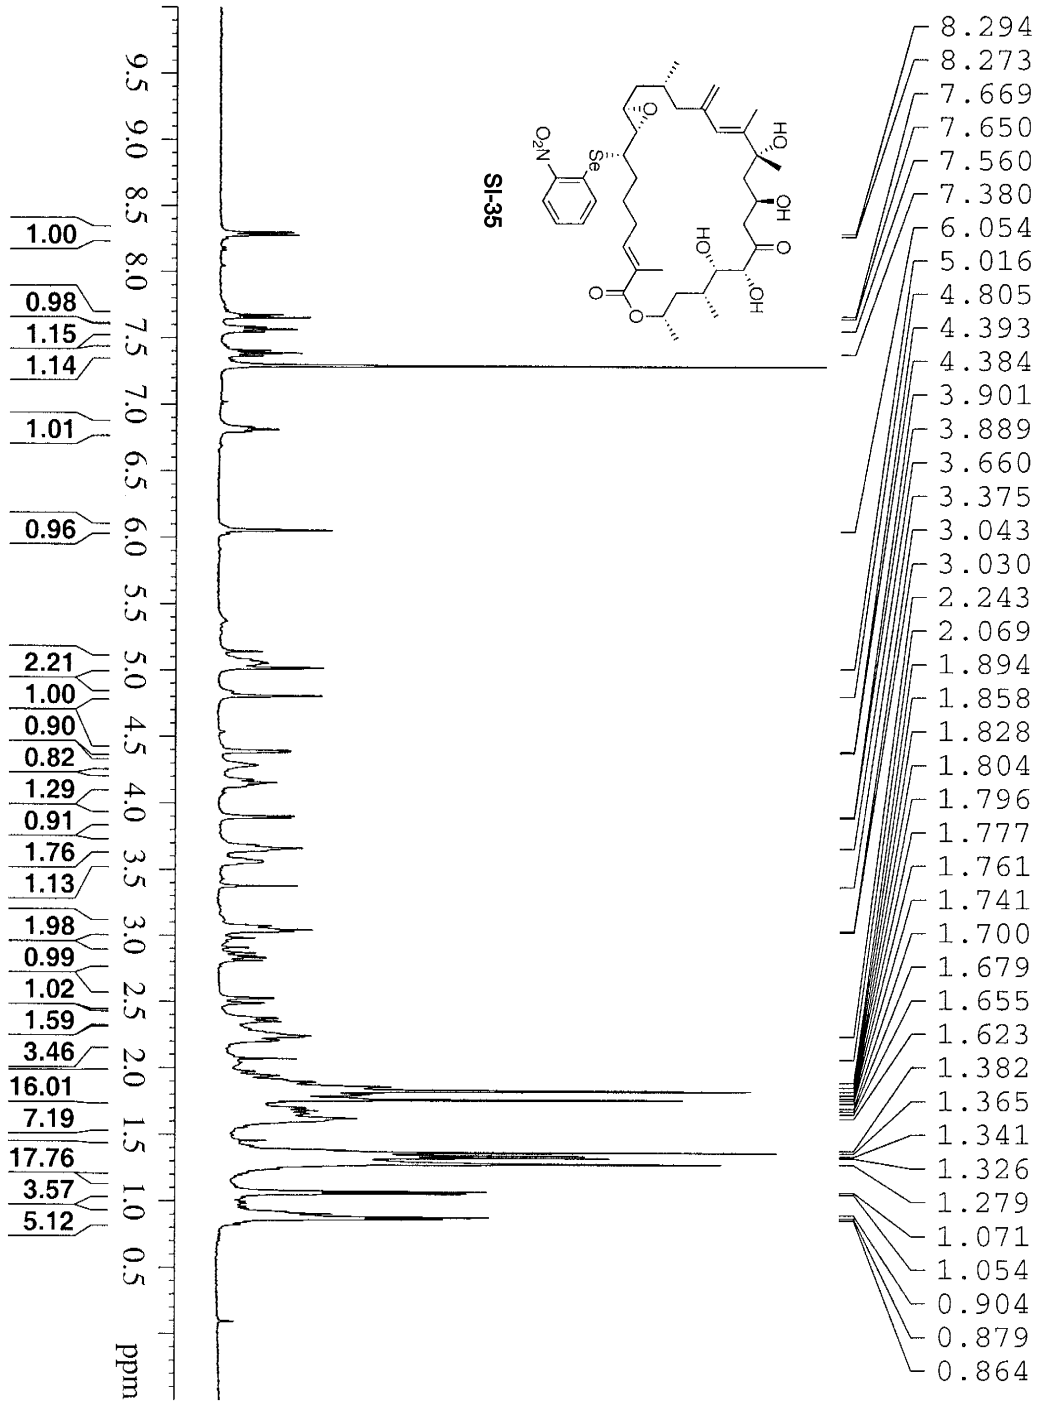

- 8.294
- 8.273
- 7.669
- 7.650
- 7.560
- 7.380
- 6.054
- 5.016
- 4.805
- 4.393
- 4.384
- 3.901
- 3.889
- 3.660
- 3.375
- 3.043
- 3.030
- 2.243
- 2.069
- 1.894
- 1.858
- 1.828
- 1.804
- 1.796
- 1.777
- 1.761
- 1.741
- 1.700
- 1.679
- 1.655
- 1.623
- 1.382
- 1.365
- 1.341
- 1.326
- 1.279
- 1.071
- 1.054
- 0.904
- 0.879
- 0.864

- 1.00
- 0.98
- 1.15
- 1.14
- 1.01
- 0.96
- 2.21
- 1.00
- 0.90
- 0.82
- 1.29
- 0.91
- 1.76
- 1.13
- 1.98
- 0.99
- 1.02
- 1.59
- 3.46
- 16.01
- 7.19
- 17.76
- 3.57
- 5.12

Current Data Parameters  
 Name: SI-35  
 EXPNO: 1  
 PROCNO: 1  
 DU: /n  
 USER: Liang

F2 - Acquisition Parameters  
 Date\_: 20080413  
 Time: 23.14  
 INSTRUM: spect  
 P1: 0.00000000  
 P2: 0.00000000  
 PULPROG: zgpg30  
 TD: 32768  
 SOLVENT: CDCl3  
 NS: 21  
 DS: 2  
 SWH: 6410.256 Hz  
 FIDRES: 0.195625 Hz  
 AQ: 2.5559540 sec  
 SFO: 399.9528000 MHz  
 DSI: 78.000 usec  
 DE: 6.00 usec  
 TE: 298.2 K  
 D1: 2.00000000 sec  
 TDO: 1

\*\*\*\*\* CHANNEL f1 \*\*\*\*\*  
 NUCL1: 1H  
 P1: 14.70 usec  
 PL1: 0.00000000  
 SFO1: 399.9528000 MHz

F2 - Processing parameters  
 SI: 32768  
 SF: 399.9528000 MHz  
 WIDW: 0  
 SSB: 0  
 LB: 0.70 Hz  
 GB: 0  
 PC: 1.00





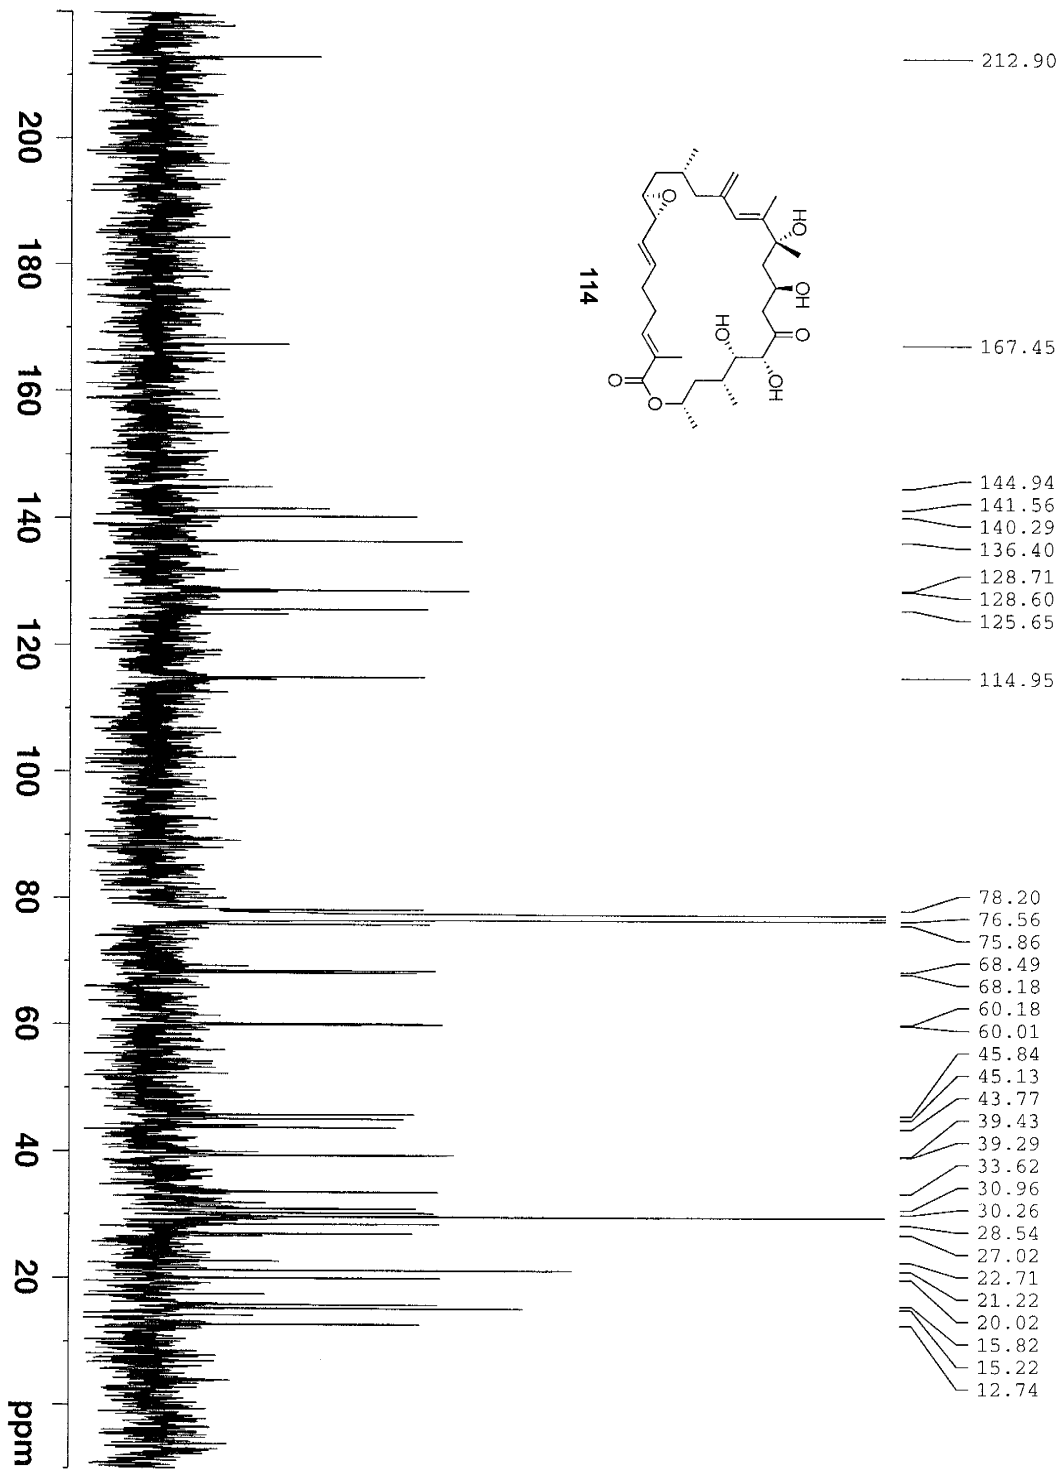

```

Current Data Parameters
NAME 7-97-2
EXPNO 3
PROCNO 1
DU /h
USER Liang

F2 - Acquisition Parameters
Date_ 20080314
Time 7.52
INSTRUM DFX400
PROBHD 5 mm BBO ES-1H
PULPROG zgpg30
TD 65536
SOLVENT
NS 19200
DS 4
SWH 25125.629 Hz
FIDRES 0.383387 Hz
AQ 3.022164 sec
RG 11585.2
DE 19.900 us
TE 298.2 K
D1 0.15000001 sec
D11 0.03000000 sec
DELTA 0.05000000 sec
TD0 1

===== CHANNEL f1 =====
NUC1 13C
P1 13C
RG1 12.80 us
SF01 100.5785100 MHz

===== CHANNEL f2 =====
CPDPRG2 waltz16
NUC2 1H
PCPD2 135.00 us
PL2 17.40 dB
PL12 17.40 dB
PL13 17.40 dB
SFO2 399.9516000 MHz

F2 - Processing Parameters
SI 32768
SF 100.5675080 MHz
WDW EM
SSB 0
LB 3.00 Hz
GB 0
PC 1.40

```







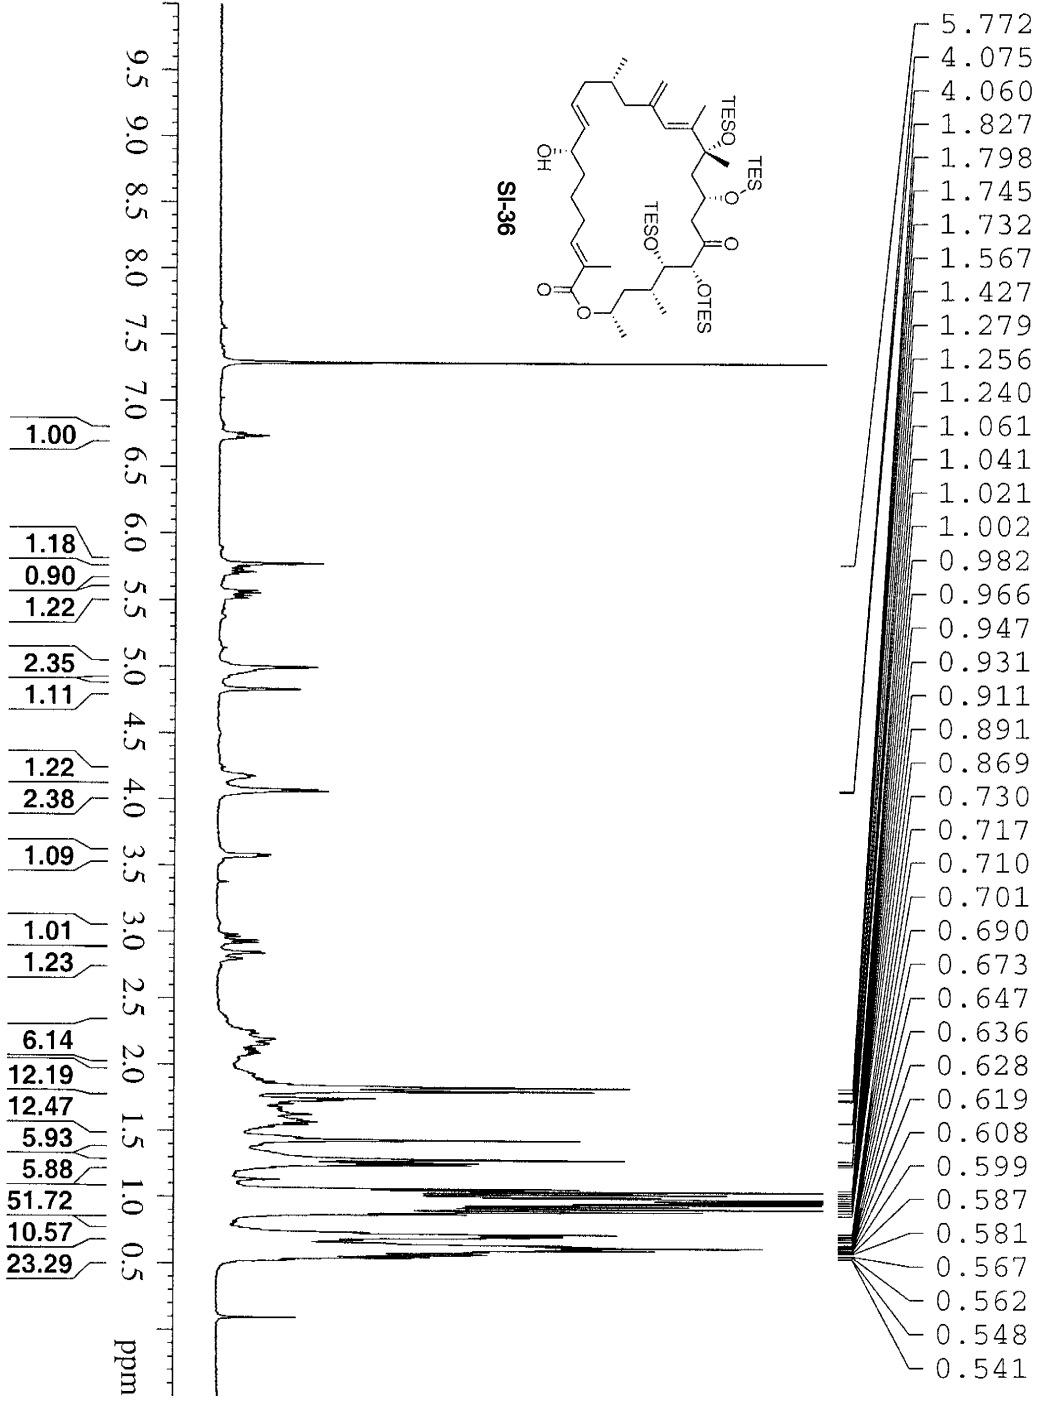

| Chemical Shift (ppm) |
|----------------------|
| 5.772                |
| 4.075                |
| 4.060                |
| 1.827                |
| 1.798                |
| 1.745                |
| 1.732                |
| 1.567                |
| 1.427                |
| 1.279                |
| 1.256                |
| 1.240                |
| 1.061                |
| 1.041                |
| 1.021                |
| 1.002                |
| 0.982                |
| 0.966                |
| 0.947                |
| 0.931                |
| 0.911                |
| 0.891                |
| 0.869                |
| 0.730                |
| 0.717                |
| 0.710                |
| 0.701                |
| 0.690                |
| 0.673                |
| 0.647                |
| 0.636                |
| 0.628                |
| 0.619                |
| 0.608                |
| 0.599                |
| 0.587                |
| 0.581                |
| 0.567                |
| 0.562                |
| 0.548                |
| 0.541                |

Current Data Parameters  
 EXPNO 8-26  
 PROCNO 1  
 DU 1/n  
 USER Liang

F2 - Acquisition Parameters  
 Date\_ 20080421  
 Time 17.57  
 INSTRUM DPX400  
 PULPROG zgpg30  
 TD 32768  
 SOLVENT CDCl3  
 NS 19  
 DS 4  
 SWH 6410.256 Hz  
 FIDRES 0.195635 Hz  
 AQ 2.5595940 sec  
 RG 78.181  
 BQ 78.181 ussec  
 DE 6.00 ussec  
 TE 298.2 K  
 D1 2.00000000 sec  
 TDO 1

===== CHANNEL f1 =====  
 NUC1 1H  
 P1 4.70 ussec  
 PL 0.00 dB  
 SFO 399.952800 MHz

F2 - Processing parameters  
 SI 399.953768 MHz  
 SF 399.953000 MHz  
 WDW 0  
 SSB 0  
 LB 0.70 Hz  
 GB 0  
 PC 1.00



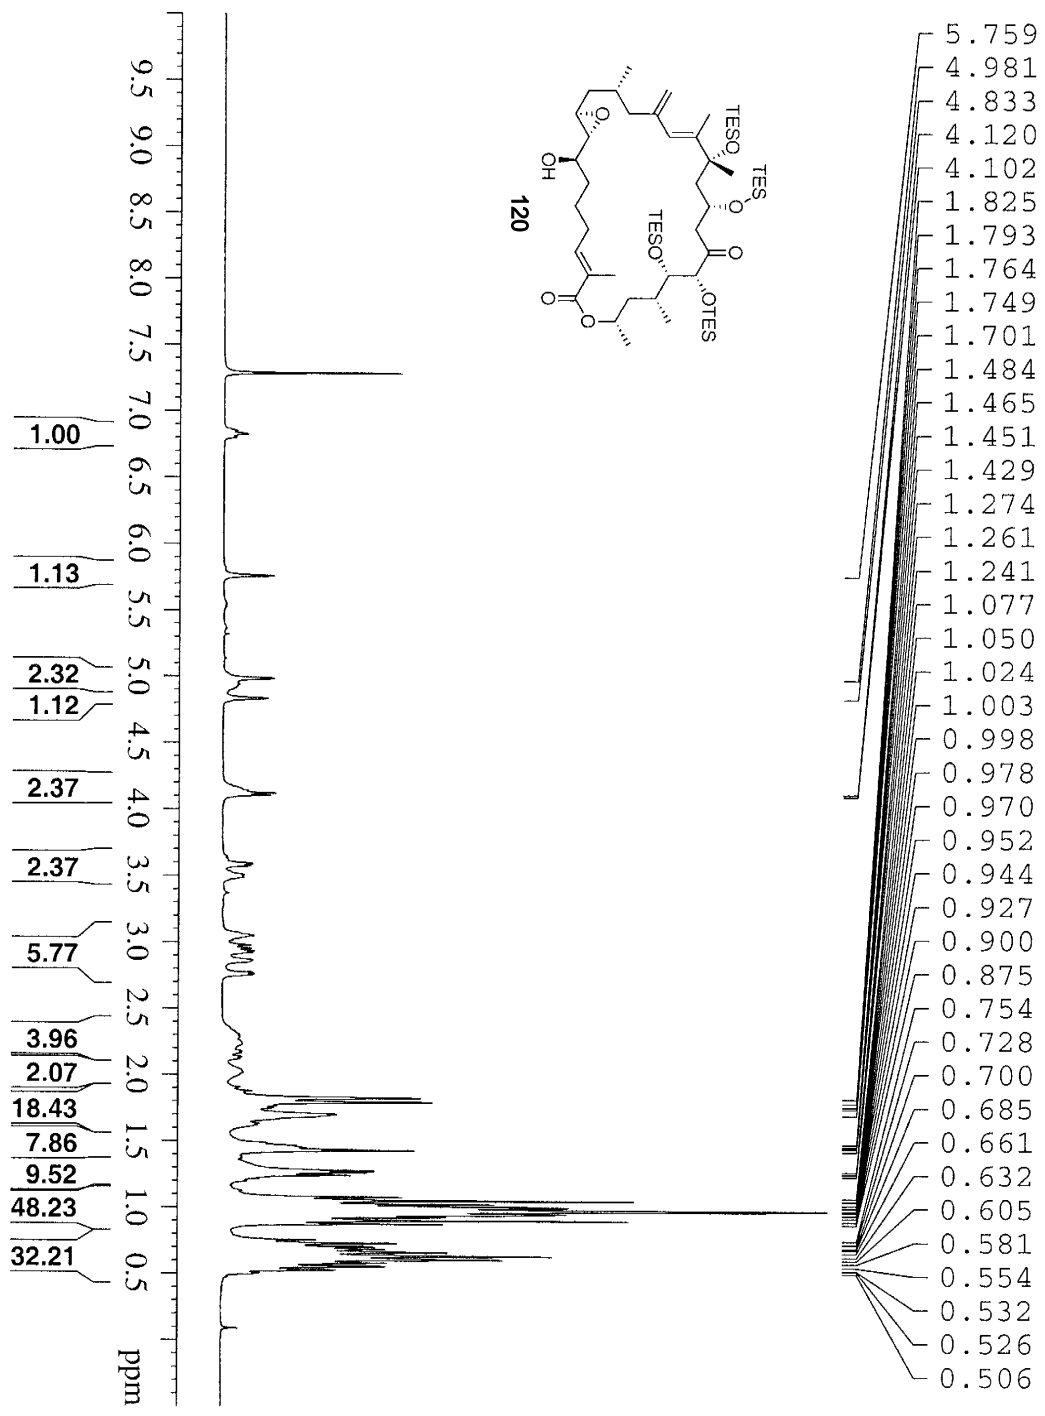

|       |
|-------|
| 5.759 |
| 4.981 |
| 4.833 |
| 4.120 |
| 4.102 |
| 1.825 |
| 1.793 |
| 1.764 |
| 1.749 |
| 1.701 |
| 1.484 |
| 1.465 |
| 1.451 |
| 1.429 |
| 1.274 |
| 1.261 |
| 1.241 |
| 1.077 |
| 1.050 |
| 1.024 |
| 1.003 |
| 0.998 |
| 0.978 |
| 0.970 |
| 0.952 |
| 0.944 |
| 0.927 |
| 0.900 |
| 0.875 |
| 0.754 |
| 0.728 |
| 0.700 |
| 0.685 |
| 0.661 |
| 0.632 |
| 0.605 |
| 0.581 |
| 0.554 |
| 0.532 |
| 0.526 |
| 0.506 |

```

Current Data Parameters
NAME          8-22
EXPNO        2
PROCNO       1
DS            1
USBR         /n
LARG         /m

F2 - Acquisition Parameters
Date_         20080403
Time         22:50
INSTRUM      spect
PROBHD       5 mm QNP
PULPROG      zg30
TD           32768
SOLVENT      CDCl3
NS           32
DS           2
SWH          4789.272 Hz
FIDRES      0.146157 Hz
AQ          3.421291 sec
RG          104.400
AQ          104.400 usec
DE          6.00 usec
TE          298.2 K
T20        2.00000000 sec
T30        1

***** CHANNEL f1 *****
NUC1         1H
P1           9.10 usec
PL1         -3.00 dB
SFO1        300.1321009 MHz

F2 - Processing parameters
SI          300.1321009 MHz
WDW         EM
SSB         0
LB          0.30 Hz
GB          0
PC          1.00
  
```

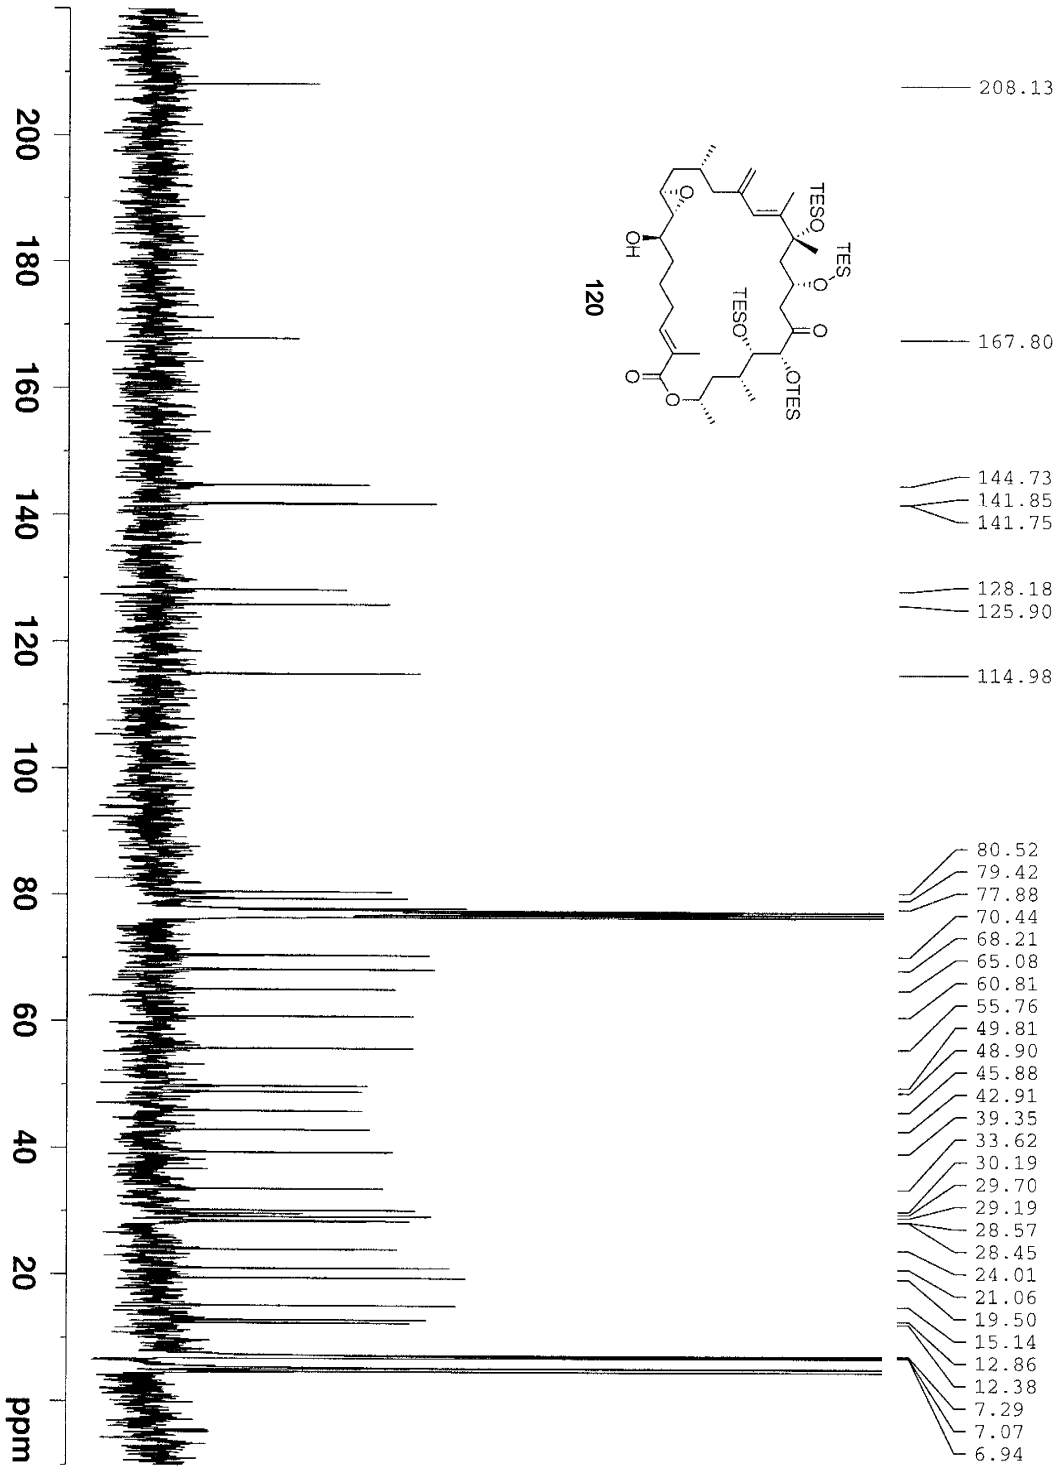

120

```

Current Data Parameters
NAME      8-22
EXPNO    4
PROCNO   1
F2       /n
USER     Liang

F2 - Acquisition Parameters
Date_    20080403
Time     23.05
INSTRUM  5 mm QNP
PROBHD   DFX100
PULPROG  zgpg30
SOLVENT  CDCl3
NS       1392
DS       2
SWH      18812.393 Hz
FIDRES   0.287360 Hz
AQ       1.7460308 sec
RG       812.7
DE       26.550 um
TE       298.2 K
D1       0.15000001 sec
c11      0.03000000 sec
DELTA    0.05000000 sec
TDU      1

===== CHANNEL f1 =====
NUC1     13C
P1       9.126 um
PL1      -3.00 dB
SFO1     75.4760505 MHz

===== CHANNEL f2 =====
CPDPRG2  waltz16
NUC2     1H
PCPDZ    80.00 um
PL2      -3.00 dB
PL12     17.55 dB
PL13     17.55 dB
SFO2     300.1312005 MHz

F2 - Processing parameters
SI       32768
SF       75.4677499 MHz
WDW      EM
SSB      0
GB       0
PC       1.40
  
```



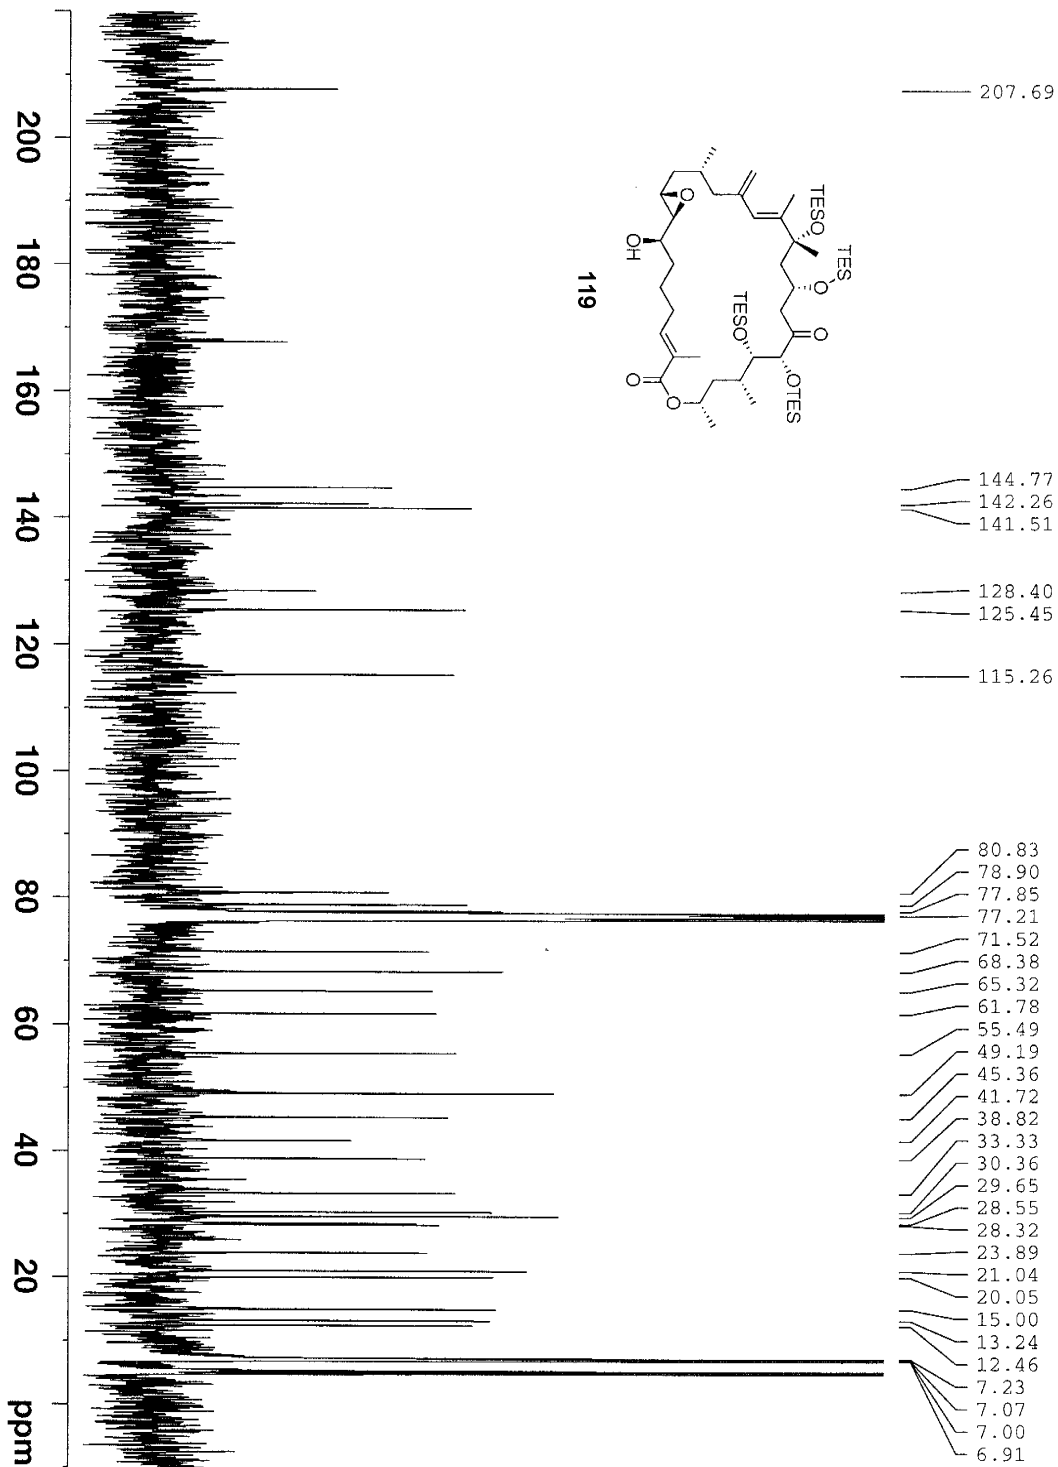

119

```

Current Data Parameters
NAME      8-22-2
EXPNO    1
PROCNO   1
CU       /n
USER     Liang

F2 - Acquisition Parameters
Date_    20080406
Time     12.20
INSTRUM  5 mm QNP 1H/1
PROBHD   DFX100
PULPROG  zgpg30
TD        65536
CQ13     13.62
SOLVENT  CDCl3
NS       3364
DS       4
SWH      19832.393 Hz
FIDRES   0.287360 Hz
AQ        1.7400308 sec
RG         912.3
DE        26.550 us
TE        6.00 us
D1        298.2 K
d11       0.15000001 sec
DELTA    0.03000000 sec
DELTA2   0.05000000 sec
TD0       1

===== CHANNEL f1 =====
NUC1      13C
P1        13.00 us
PC1       3.20 dB
RF1       75.4760505 MHz

===== CHANNEL f2 =====
CPDPRG2   waltz16
NUC2       1H
PCPD2     80.00 us
PL2       -3.00 dB
PL12      17.55 dB
PL13      17.55 dB
SFO2      300.1312005 MHz

F2 - Processing parameters
SI         32768
SF         75.4677490 MHz
WDW        EM
SSB        0
LB         3.00 Hz
GB         0
PC         1.40
  
```

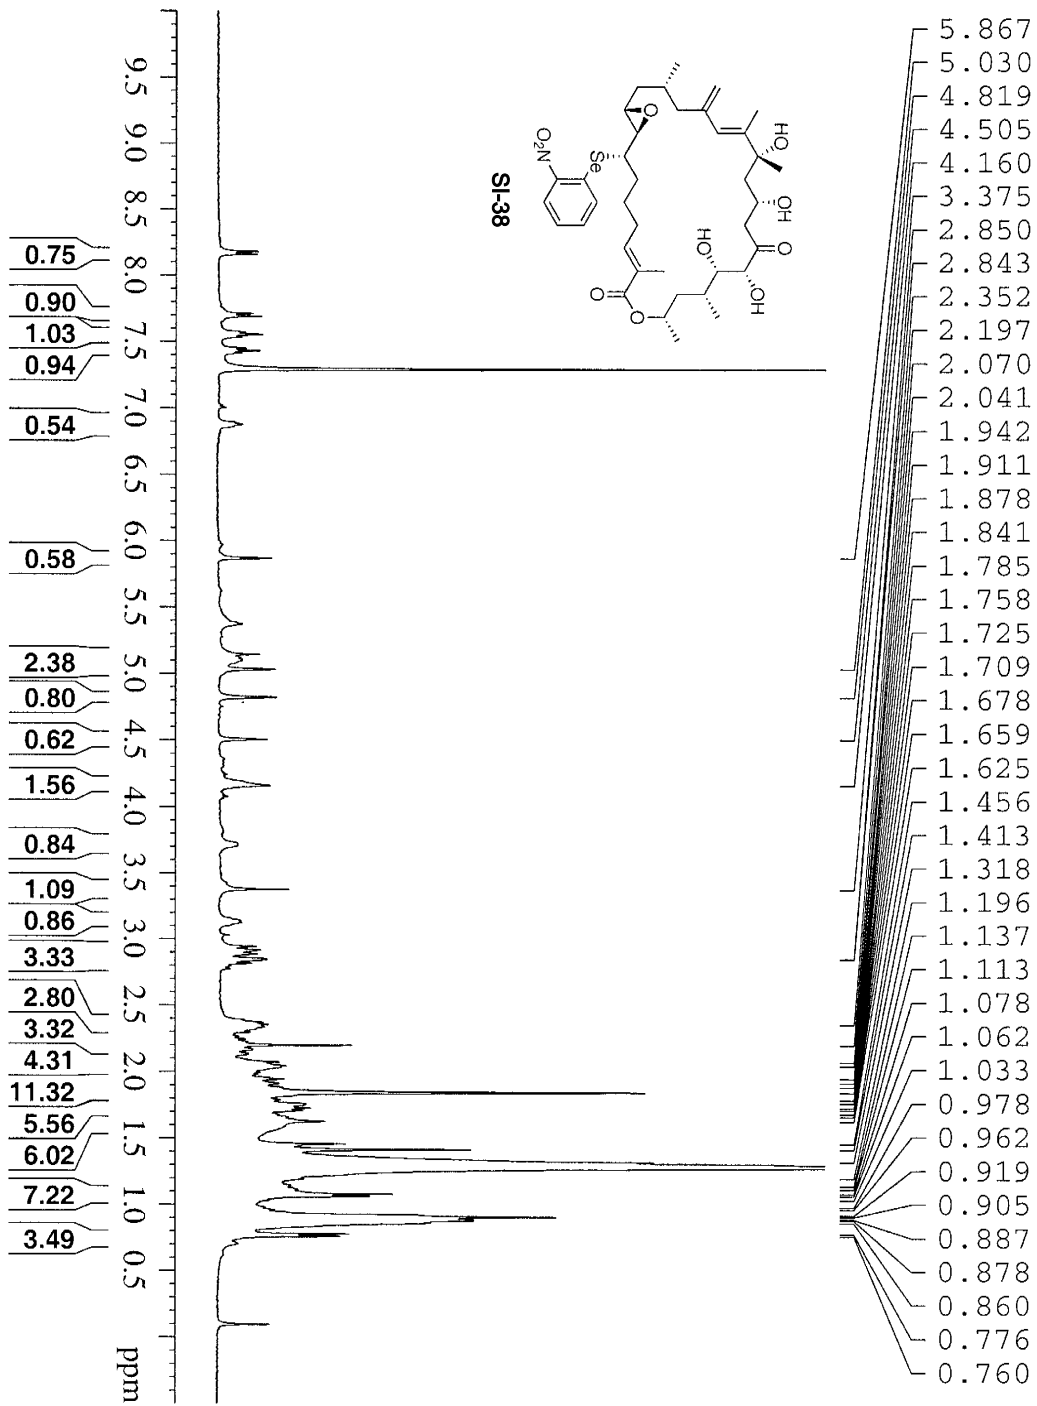

Current Data Parameters  
 Name: SI-38  
 EXPNO: 9-2  
 PROCNO: 1  
 DU: 1  
 USER: Llang

F2 - Acquisition Parameters  
 Date\_: 20080407  
 Time: 12.34  
 P1: 12.34  
 P2: 64.19  
 PROBHD: 5 mm BBO  
 PULPROG: zgpg30  
 TD: 2630  
 SOLVENT: CDCl3  
 NS: 32  
 DS: 2  
 SWH: 6410.256 Hz  
 FIDRES: 0.195625 Hz  
 AQ: 2.5559540 sec  
 RG: 441  
 DQ: 78.000 usec  
 DE: 6.30 usec  
 TE: 298.2 K  
 D1: 2.00000000 sec  
 L1: 1

===== CHANNEL f1 =====  
 NUC1: 1H  
 P1: 14.00 usec  
 PL1: 0.00 dB  
 SFO1: 399.9528000 MHz

F2 - Processing parameters  
 SI: 200000  
 SF: 399.9500000 MHz  
 WDW: EM  
 SSB: 0  
 LB: 0.70 Hz  
 GB: 0  
 PC: 1.00





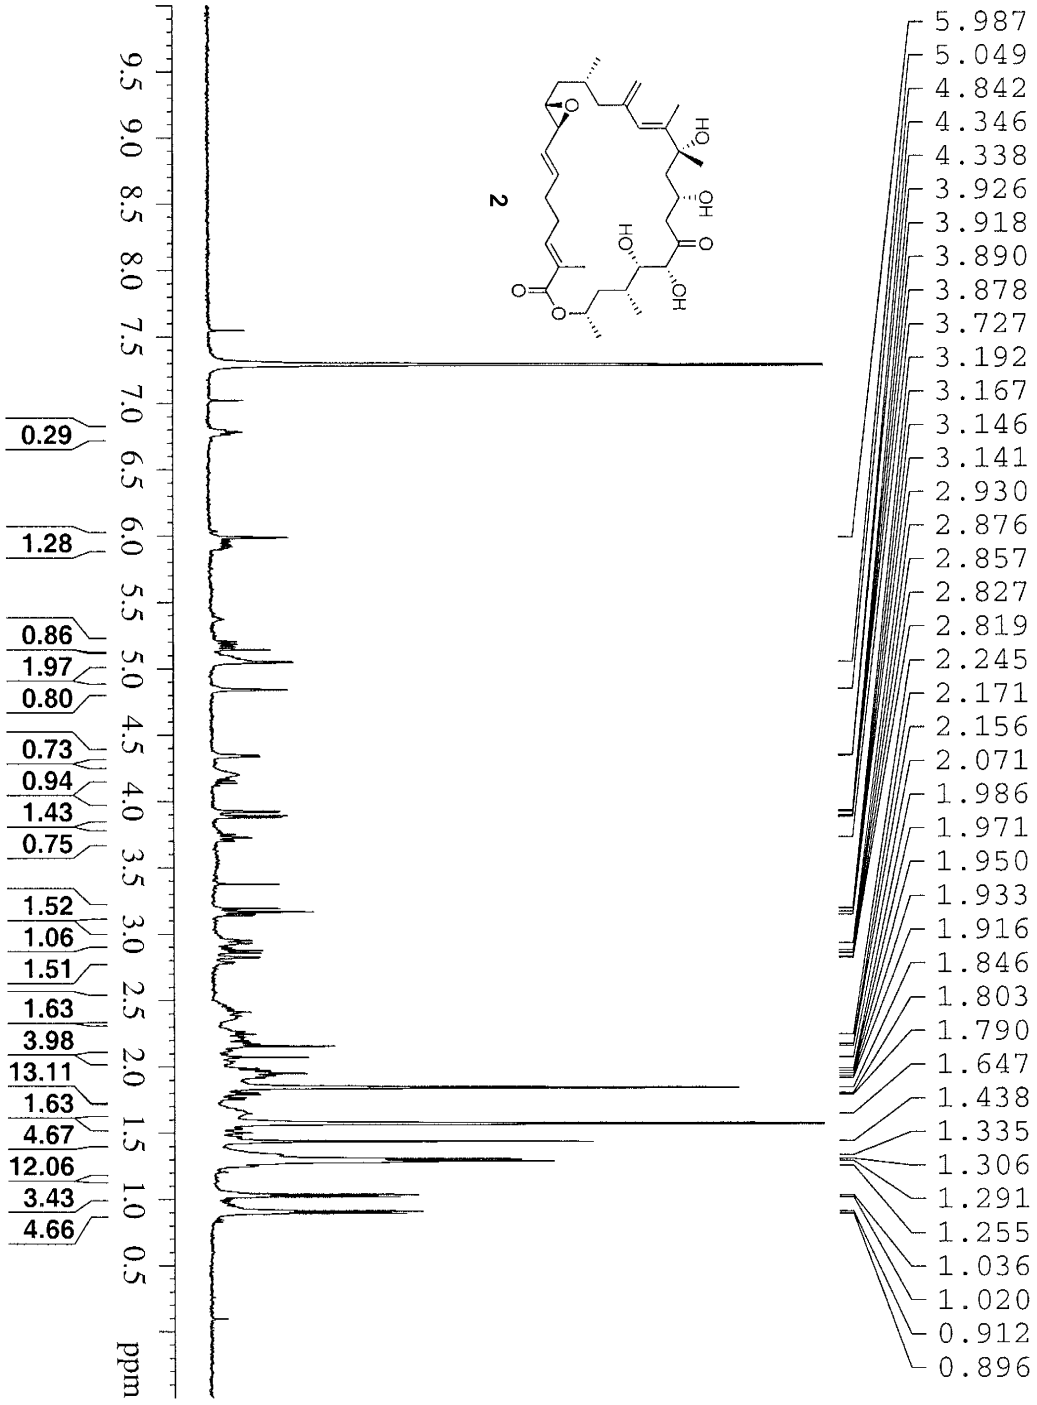

Current Data Parameters  
 NAME: 8-52  
 EXNO: 5  
 PRONO: 1  
 CN: 1  
 USR: /n  
 F2 - Acquisition Parameters  
 Date\_: 20080410  
 Time: 17.12  
 Name: P1712  
 PULPROG: zgpg30  
 BRGDND: 5 mm BBO BB-1H  
 PULPROG: zgpg30  
 TD: 32768  
 SOLVENT: CDCl3  
 NS: 6  
 DS: 2  
 SWH: 6410.256 Hz  
 FIDRES: 0.195625 Hz  
 AQ: 2.155940 sec  
 RG: 1296  
 CW: 78.000 usec  
 CE: 6.00 usec  
 TE: 298.2 K  
 TD0: 2.00000000 sec  
 ===== CHANNEL f1 =====  
 NUC1: 1H  
 P1: 14.00 usec  
 PL1: 0.00 dB  
 SFO1: 399.9528000 MHz  
 F2 - Processing parameters  
 SF: 399.9500000 MHz  
 WIDW: EM  
 SSB: 0  
 LB: 0.70 Hz  
 GB: 0  
 PC: 1.00

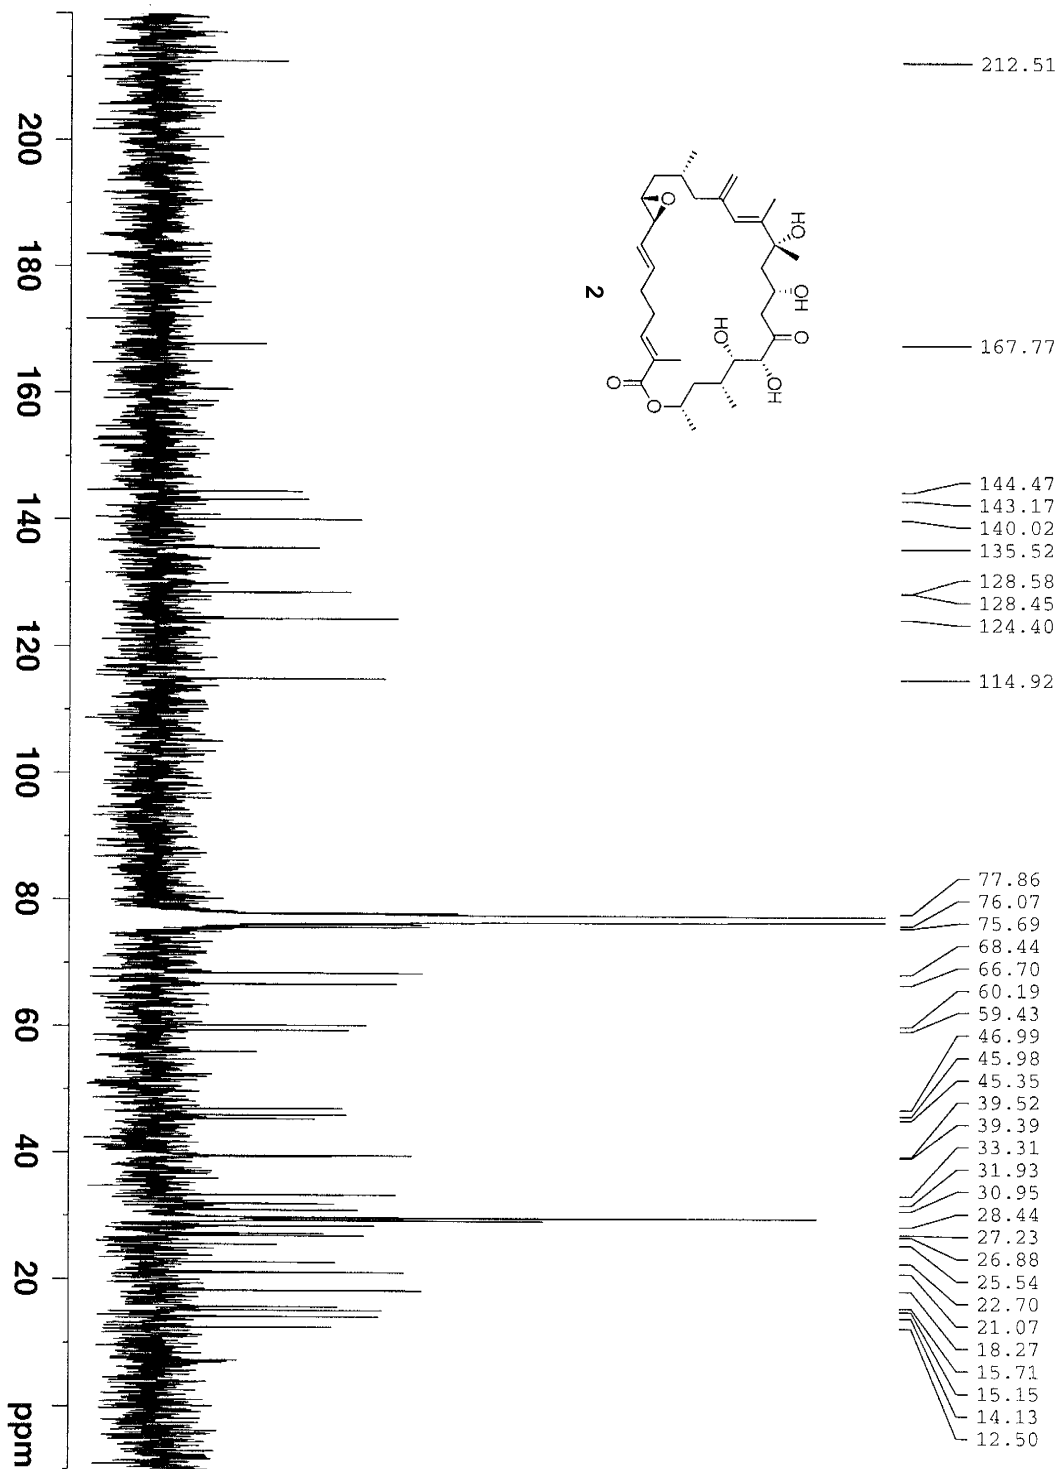

Current Data Parameters  
 NAME 8-32  
 EXPRG 10  
 PROCNO 1  
 DU /h  
 USER Liang

F2 - Acquisition Parameters  
 Date\_ 20080411  
 Time 21.28  
 INSTRUM CPX400  
 PROBNB 5 mm BBO BB-1H  
 FREQH0 299.930  
 F2PRG0 65536  
 TD  
 SOLVENT  
 NS 57641  
 DS 1  
 SFR1 25125.629 Hz  
 R1DRBS 0.381387 Hz  
 AQ 1.3042164 sec  
 RG 3649.1  
 DW 19.900 usec  
 DE 6.00 usec  
 CE 298.2 K  
 D1 0.15000001 sec  
 D11 0.03000000 sec  
 DELTA 0.05000000 sec  
 TDO 1

==== CHANNEL f1 =====  
 NUC1 13C  
 P1 7.80 usec  
 P2 -3.100 usec  
 SFO1 100.5785700 MHz

==== CHANNEL f2 =====  
 CPDPRG2 waltz16  
 NUC2 1H  
 P1 135.00 usec  
 P2 17.40 usec  
 P12 17.40 usec  
 P13 17.40 usec  
 SFO2 399.9516000 MHz

F2 - Processing parameters  
 SI 32768  
 SF 100.5575080 MHz  
 WDM 0  
 SSB EM  
 LB 3.00 Hz  
 GB 0  
 FC 1.40

# Comparison of $^1\text{H}$ NMR Data for Synthesis and Natural Amphidinolide B<sub>1</sub> (2)

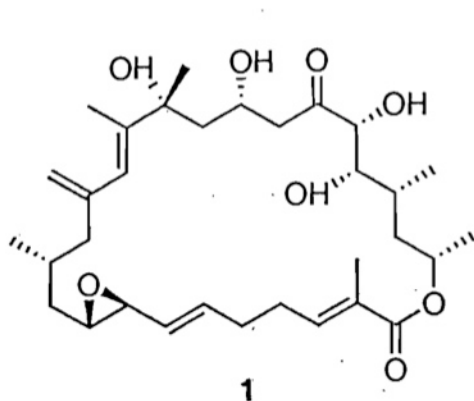

Natural 2

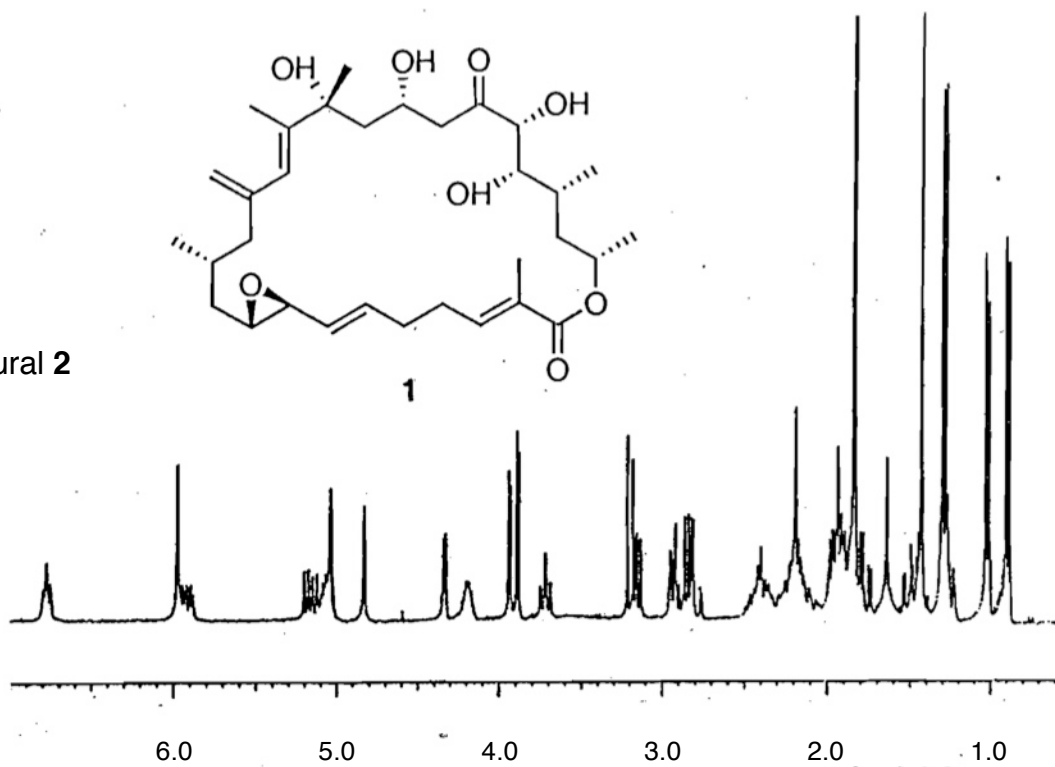

Synthetic 2

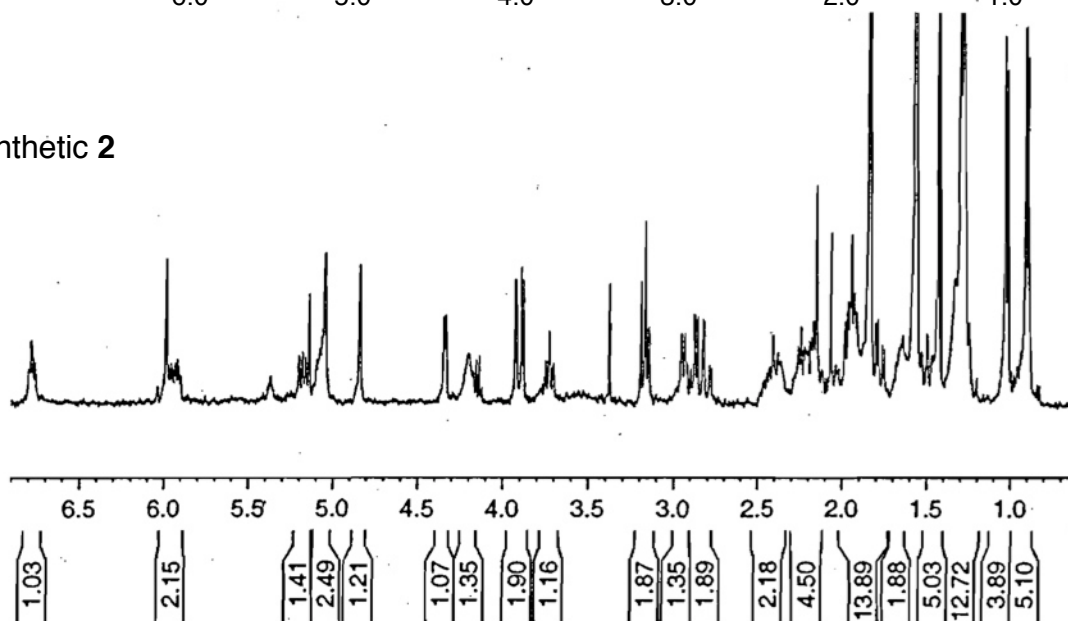

## Comparison of $^{13}\text{C}$ NMR Data for Synthesis and Natural Amphidinolide B<sub>1</sub> (2)

| Synthetic 2 $^{13}\text{C}$ NMR Data<br>(CDCl <sub>3</sub> , 100 MHz) | Natural 2 $^{13}\text{C}$ NMR Data <sup>a</sup><br>(CDCl <sub>3</sub> , 150 MHz) |
|-----------------------------------------------------------------------|----------------------------------------------------------------------------------|
| 212.51                                                                | 212.49                                                                           |
| 167.77                                                                | 167.77                                                                           |
| 144.47                                                                | 144.47                                                                           |
| 143.17                                                                | 143.16                                                                           |
| 140.02                                                                | 140.04                                                                           |
| 135.52                                                                | 135.45                                                                           |
| 128.58                                                                | 128.60                                                                           |
| 128.45                                                                | 128.44                                                                           |
| 124.40                                                                | 124.37                                                                           |
| 114.92                                                                | 114.89                                                                           |
| 77.86                                                                 | 77.84                                                                            |
| 76.07                                                                 | 76.01                                                                            |
| 75.69                                                                 | 75.62                                                                            |
| 68.44                                                                 | 68.46                                                                            |
| 66.70                                                                 | 66.58                                                                            |
| 60.19                                                                 | 60.11                                                                            |
| 46.99                                                                 | 46.96                                                                            |
| 45.98                                                                 | 45.97                                                                            |
| 45.35                                                                 | 45.36                                                                            |
| 39.52                                                                 | 39.51                                                                            |
| 39.39                                                                 | 39.45                                                                            |
| 33.31                                                                 | 33.27                                                                            |
| 30.95                                                                 | 30.92                                                                            |
| 29.35                                                                 | 29.26                                                                            |
| 28.44                                                                 | 28.40                                                                            |
| 26.88                                                                 | 26.87                                                                            |
| 21.07                                                                 | 21.04                                                                            |
| 18.27                                                                 | 18.33                                                                            |
| 15.71                                                                 | 15.71                                                                            |
| 15.15                                                                 | 15.10                                                                            |
| 12.50                                                                 | 12.48                                                                            |

<sup>a</sup> Tsuda, M.; Kubota, T.; Sakuma, Y.; Kobayashi, J. *Chem. Pharm. Bull.* **2001**, *49*, 1366-67. See also, Ishibashi, M.; Ohizumi, Y.; Hamashima, M.; Nakamura, H.; Hirata, Y.; Sasaki, T.; Kobayashi, J. *J. Chem. Soc., Chem. Commun.* **1987**, 1127-29.

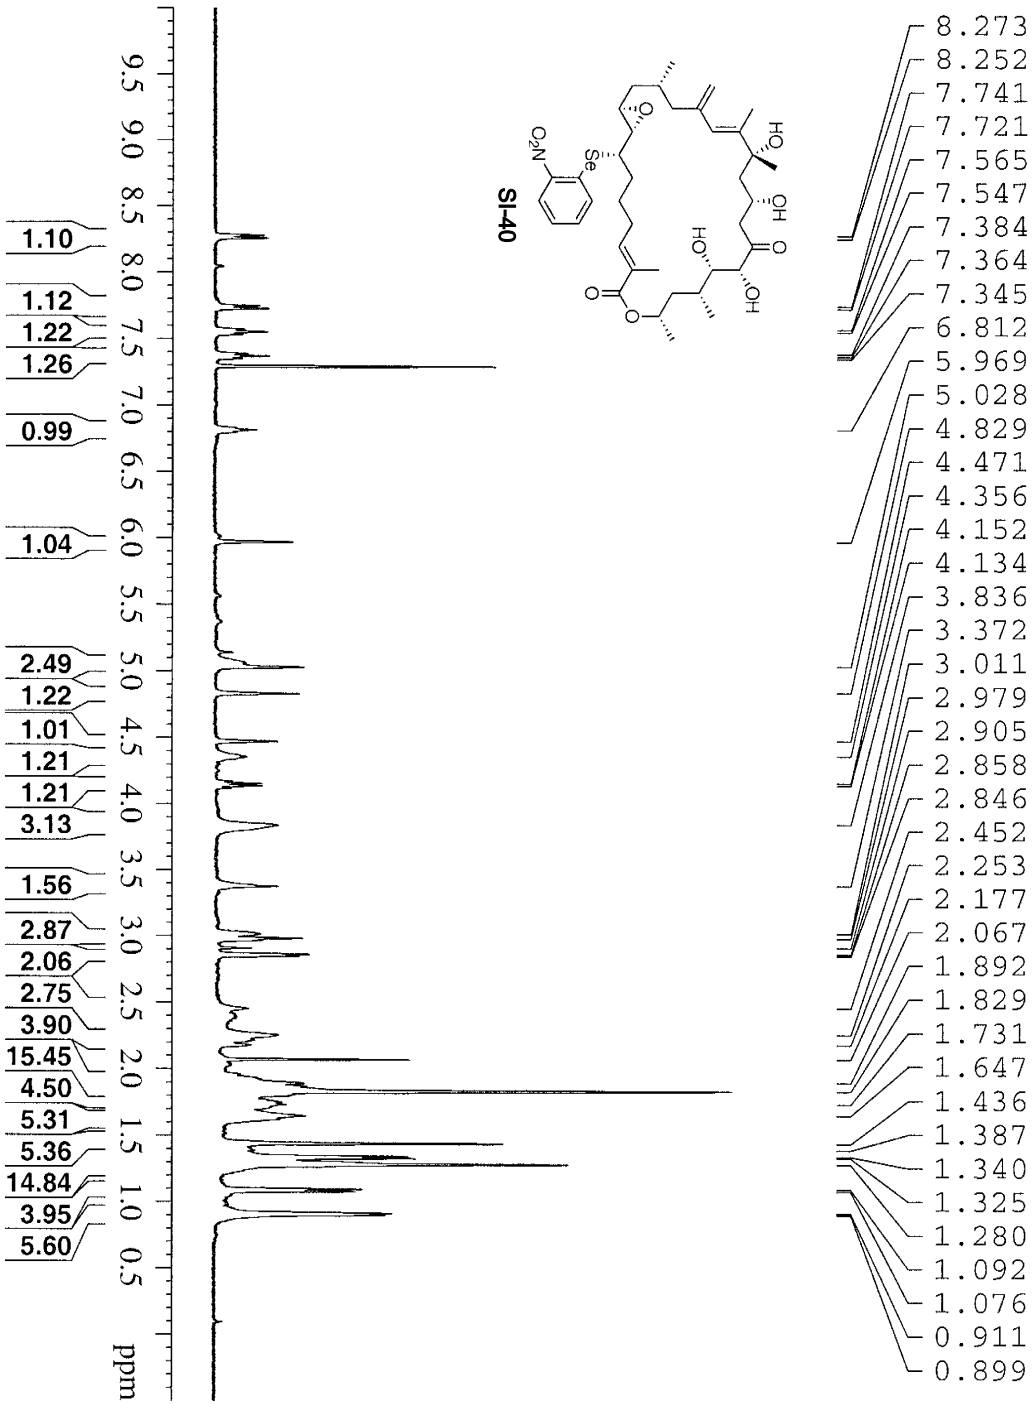

```

Current Data Parameters
NAME          8.22
EXPNO        2
PROCNO       1
DS            1
USER         /n

F2 - Acquisition Parameters
Date_         20080405
Time         16.05
Date_        20080405
PROBHD       5 mm BBO BB-1H
PULPROG      zg30
TD           32768
SOLVENT      CHCl3
NUC1          13
DS            2
SWH           6410.256 Hz
FIDRES       0.195625 Hz
AQ           2.1559542 sec
RG           78.500
DE           6.00 usec
TE           298.2 K
TD0          2.0030000 sec

***** CHANNEL f1 *****
NUC1          1H
PUL1          zgpg30
SFO1          399.9528000 MHz

F2 - Processing parameters
SI           399.9500000 MHz
SF           0
SSB          0
GB           0
PC           1.00
  
```

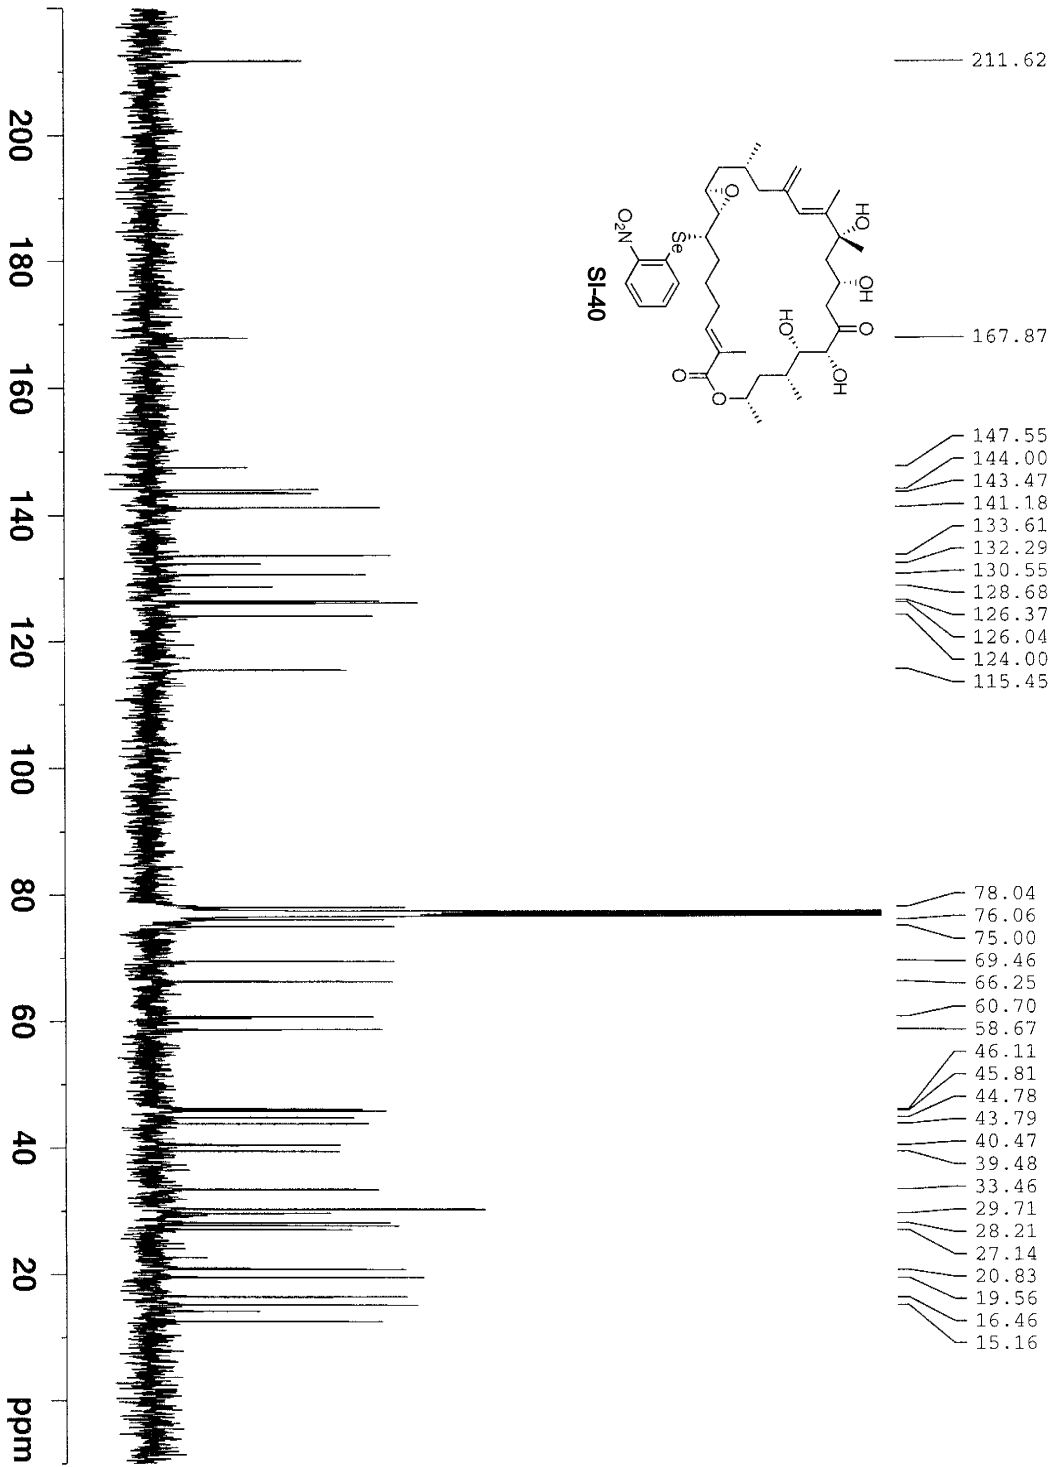

211.62

167.87

147.55  
144.00  
143.47  
141.18  
133.61  
132.29  
130.55  
128.68  
126.37  
126.04  
124.00  
115.45

78.04  
76.06  
75.00  
69.46  
66.25  
60.70  
58.67  
46.11  
45.81  
44.78  
43.79  
40.47  
39.48  
33.46  
29.71  
28.21  
27.14  
20.83  
19.56  
16.46  
15.16

```

Current Data Parameters
NAME      8-26
EXPNO     4
PROCNO    1
PU         1/h
USER      Lang
F2 - Acquisition Parameters
Date_     20080405
Time      16.55
INSTRUM   DEK400
PROBHD    5 mm BBO BB-1H
PULPROG   zgpg30
TD         65536
SOLVENT    CDCl3
NS         3726
DS         4
SFO        25125.629 Hz
F1DRHS     0.383387 Hz
AQ         1.3042164 sec
RG         4096
DM         19.900 us
DE         6.00 us
TE         298.2 K
D1         0.15000001 sec
D1.1       0.03000000 sec
DELTA     0.05000000 sec
TDO        1

===== CHANNEL f1 =====
NUC1       13C
P1         7.88 us
PC         3.00 dB
SFO1       100.5785100 MHz

===== CHANNEL f2 =====
CPDPRG2    waltz16
NUC2       135.00 us
PCPD2      17.40 dB
PL2        17.40 dB
PL12       17.40 dB
PL13       17.40 dB
SFO2       399.9516000 MHz

F2 - Processing Parameters
SI         32768
SF         100.5675080 MHz
WDW        EM
SS         0
SBS        3.00 Hz
GB         0
PC         1.40
  
```

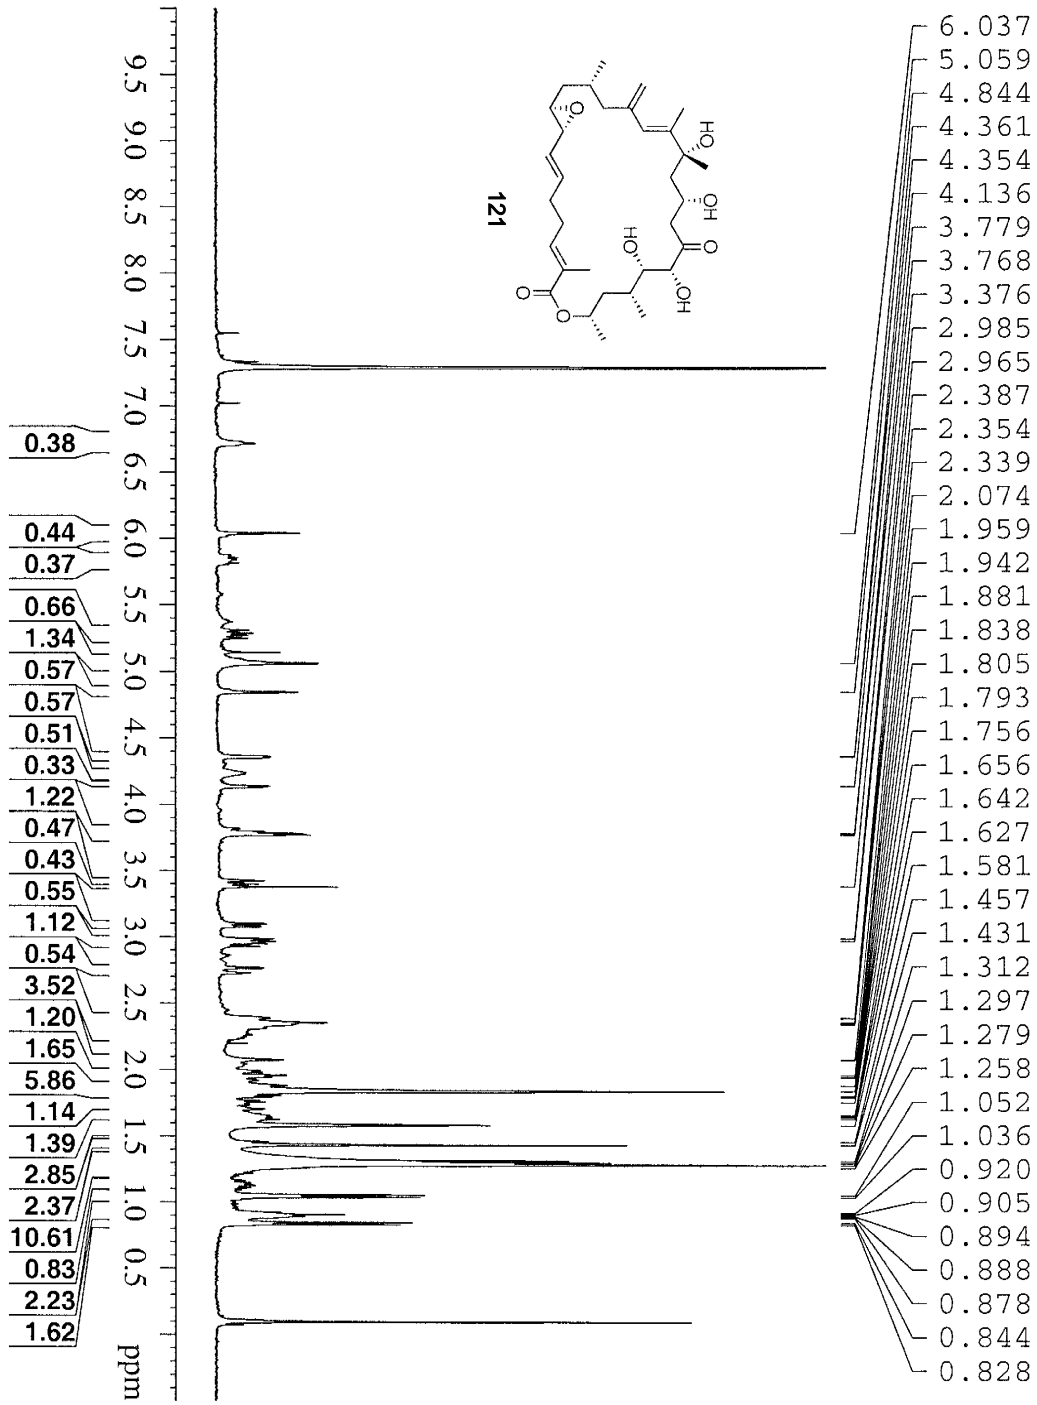

- 6.037
- 5.059
- 4.844
- 4.361
- 4.354
- 4.136
- 3.779
- 3.768
- 3.376
- 2.985
- 2.965
- 2.387
- 2.354
- 2.339
- 2.074
- 1.959
- 1.942
- 1.881
- 1.838
- 1.805
- 1.793
- 1.756
- 1.656
- 1.642
- 1.627
- 1.581
- 1.457
- 1.431
- 1.312
- 1.297
- 1.279
- 1.258
- 1.052
- 1.036
- 0.920
- 0.905
- 0.894
- 0.888
- 0.878
- 0.844
- 0.828

```

Current Data Parameters
NAME          57
EXTN          3
PROCNO       1
DE            /n
USER
===== CHANNEL F1 =====
INSTR        1H
NUC1          1H
PUL1         14
PL1          0.00 dB
SFO1         399.9528000 MHz

F2 - Processing parameters
S          5
SF         399.9500000 MHz
WDW        EM
SSB        0
GB          0
PC          1.00

===== Acquisition Parameters
Date_      20080414
Time       22:44
INSTRUM    spect
PROBHD     5 mm BBO BB-1H
PULPROG    zg30
TD         65536
FIDRES     0.32768
SOLVENT    CDCl3
DS          2
SWH         6410.256 Hz
FIDRES     0.195625 Hz
AQ         2.559540 sec
RG         78.000 usec
DE         78.000 usec
TE         298.2 K
TD0        2.00000000 sec
=====

```

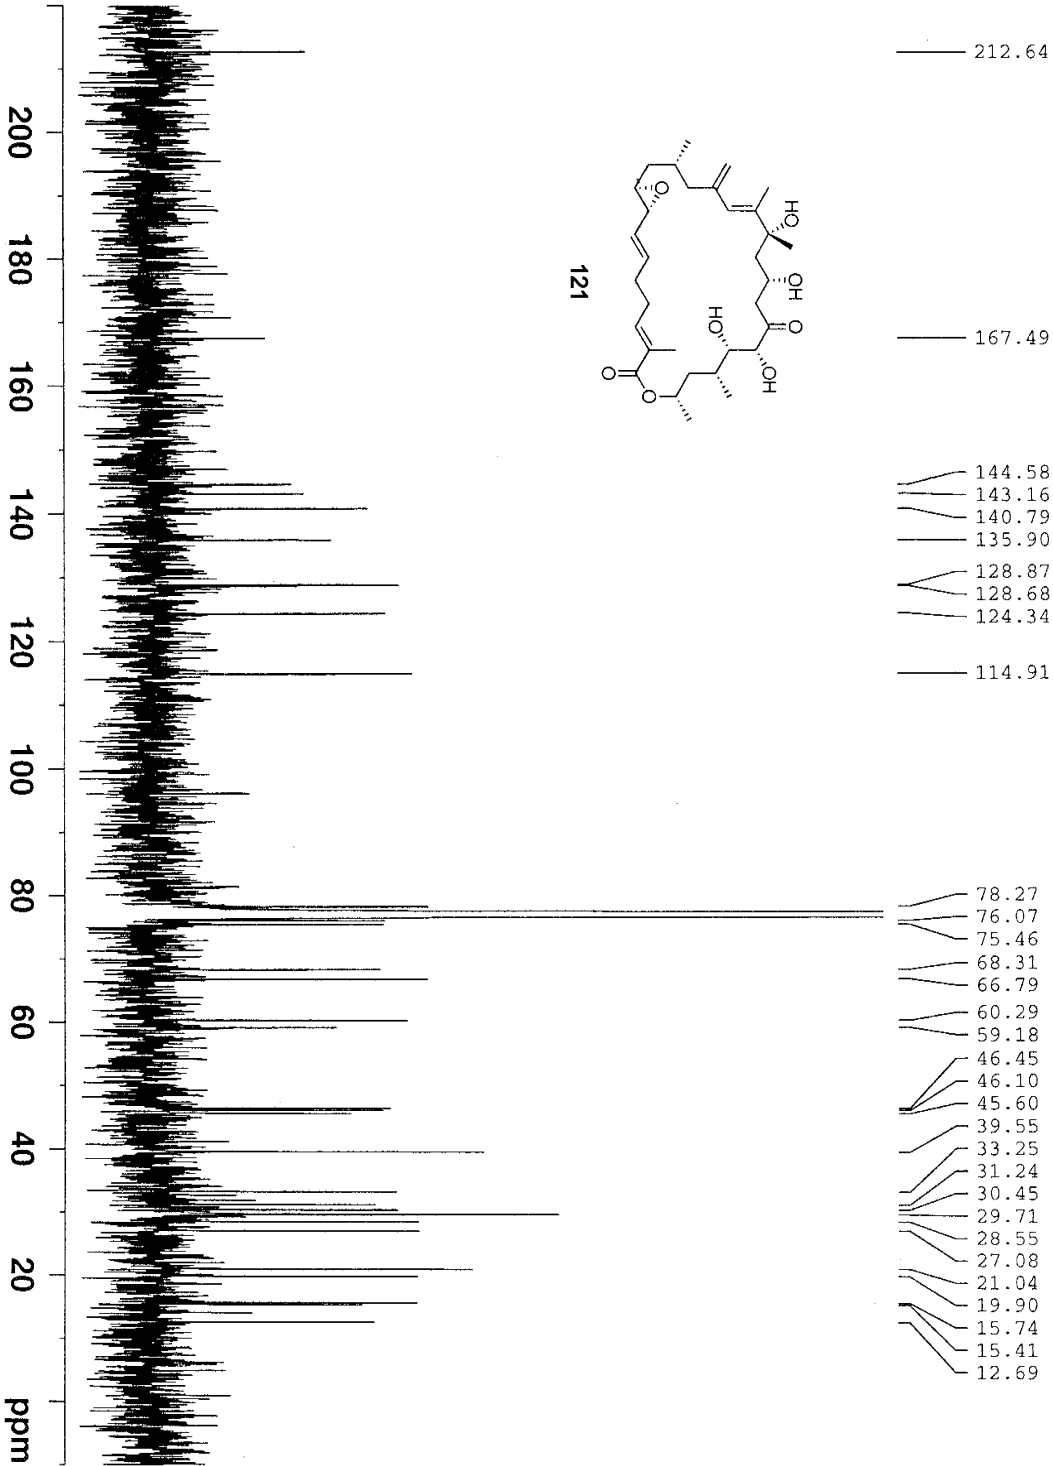

Current Data Parameters  
 NAME 8-27  
 EXNO 5  
 PROCNO 1  
 DU /n  
 USER Ljang

F2 - Acquisition Parameters  
 Date\_ 20080414  
 Time 23:58  
 INSTRUM DPK400  
 PROBMID 5 mm BBO BB-1H  
 PULPROG zgpg30  
 TD 65536  
 SOLVENT  
 NS 18937  
 DS 4  
 SSB 25125.629 Hz  
 FT2RES 0.1383387 Hz  
 AC 1.1042164 sec  
 RG 6502  
 LW 19.900 us  
 DE 6.00 us  
 FE 298.2 K  
 DI1 0.15000001 sec  
 DI2 0.03000000 sec  
 DELTA 0.05000000 sec  
 T30 1

==== CHANNEL F1 =====  
 NUCL1 13C  
 P1 7.80 us  
 F1 100.5785700 MHz  
 SF01 100.5785700 MHz

==== CHANNEL F2 =====  
 CPDPRG2 waltz16  
 NUC2 1H  
 PCPD2 135.00 us  
 P2 17.40 dt  
 P42 17.40 dt  
 P43 17.40 dt  
 SFO2 399.9516000 MHz

F2 - Processing Parameters  
 SI 32768  
 SF 100.5675080 MHz  
 WDW EM  
 SSB 0  
 LB 3.00 Hz  
 GB 0  
 PC 1.40
